# Supplementary material for: Nitrative bicyclization of 1,7-diynes for accessing skeletally diverse tricyclic pyrroles
Source: Royal Society of Chemistry journal article supplement (doi:10.1039/d2cc00206j), 2022-01-01
Supplement: d2cc00206j1.pdf [file d2cc00206j1.pdf]

## Supporting Information

### Nitrative Bicyclization of 1,7-Diynes for Accessing Skeletally Diverse Tricyclic Pyrroles

Lu Wang,<sup>a</sup> Yin Zhang,<sup>a</sup> An-Qi Miao,<sup>a</sup> Tian-Shu Zhang,<sup>\*,b</sup> Xiang Wang,<sup>c</sup> Wen-Juan Hao,<sup>\*,a</sup> Shu-Jiang Tu<sup>a</sup> and Bo Jiang<sup>\*,a</sup>

<sup>a</sup>School of Chemistry & Materials Science, Jiangsu Normal University, Xuzhou, 221116, P. R. China; email: wjhao@jsnu.edu.cn (WJH); jiangchem@jsnu.edu.cn (BJ)

<sup>b</sup>School of Materials and Chemical Engineering, Xuzhou University of Technology, Xuzhou 221018, P. R. China; Email: zts11975@xzit.edu.cn

<sup>c</sup>School of Chemistry and Chemical Engineering, Huaiyin Normal University, Huaian 223300, People's Republic of China

### Contents

|                                                                                                               |           |
|---------------------------------------------------------------------------------------------------------------|-----------|
| General Information.....                                                                                      | S2        |
| Optimization of the Reaction Conditions.....                                                                  | S2-S3     |
| Synthetic Applications of <b>3a</b> .....                                                                     | S3        |
| Control Experiments.....                                                                                      | S4        |
| X-Ray Structure of Product <b>3l</b> .....                                                                    | S4        |
| Radical-Trapping Experiment.....                                                                              | S4        |
| Intermediate Detection.....                                                                                   | S5        |
| Mechanistic Investigations Control Experiment with H <sub>2</sub> <sup>18</sup> O.....                        | S5-S6     |
| General Procedure for the Synthesis of Substrates <b>1</b> .....                                              | S7-S8     |
| Characterization Data of Compounds <b>1</b> .....                                                             | S9-S14    |
| General Procedure for the Synthesis of Substrates <b>3</b> .....                                              | S14       |
| Characterization Data of Compounds <b>3a-3ff</b> .....                                                        | S14-S23   |
| General Procedure for the Synthesis of Products <b>5</b> .....                                                | S23       |
| Characterization Data of Compounds <b>5a-5h</b> .....                                                         | S23-S25   |
| General Procedure for the Synthesis of Products <b>7</b> .....                                                | S25       |
| Characterization Data of Compounds <b>7a-7e</b> .....                                                         | S25-S27   |
| General Procedure for the Scale-Up Experiment of <b>3a</b> .....                                              | S27       |
| General Procedure for the Synthesis of <b>8</b> .....                                                         | S27       |
| Characterization Data of Compounds <b>8</b> .....                                                             | S28       |
| Copies of <sup>1</sup> H and <sup>13</sup> C NMR Spectra for Compounds <b>1</b> .....                         | S29-S68   |
| Copies of <sup>1</sup> H and <sup>13</sup> C NMR Spectra for Compounds <b>3a-3ff</b> .....                    | S69-S128  |
| Copies of <sup>1</sup> H and <sup>13</sup> C NMR Spectra for Compounds <b>5a-5g, 7a-7e</b> and <b>8</b> ..... | S129-S154 |

## General Information

<sup>1</sup>H NMR (<sup>13</sup>C NMR) spectra were measured on a Bruker DPX 400 MHz spectrometer in CDCl<sub>3</sub> (DMSO-*d*<sub>6</sub>) with chemical shift ( $\delta$ ) given in ppm relative to TMS as internal standard [(s = singlet, d = doublet, t = triplet, brs = broad singlet, m = multiplet), coupling constant (Hz)]. HRMS (APCI and ESI) was determined by using microTOF-QII HRMS/MS instrument (BRUKER). X-Ray crystallographic analysis was performed with a Siemens SMART CCD and a Siemens P4 diffractometer. The melting points were measured with digital melting point detector.

**Table S1. Optimization of the Reaction Conditions for Forming 3a<sup>a</sup>**

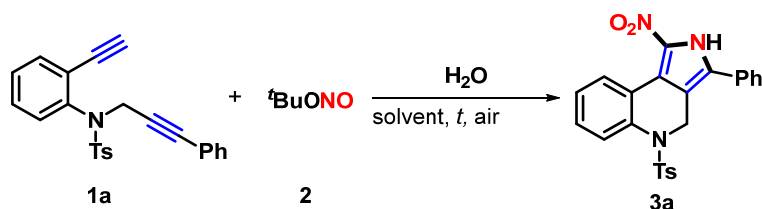

| entry           | solvent     | H <sub>2</sub> O (mmol) | <i>t</i> (°C) | yield (%) <sup>b</sup> |
|-----------------|-------------|-------------------------|---------------|------------------------|
| 1               | DMSO        | 0.46                    | 60            | 68                     |
| 2               | MeCN        | 0.46                    | 60            | trace                  |
| 3               | 1,4-dioxane | 0.46                    | 60            | trace                  |
| 4               | DMF         | 0.46                    | 60            | trace                  |
| 5               | DCE         | 0.46                    | 60            | 36                     |
| 6               | Toluene     | 0.46                    | 60            | 43                     |
| 7               | THF         | 0.46                    | 60            | 65                     |
| 8               | DMSO        | 0.46                    | 25            | 34                     |
| 9               | DMSO        | 0.46                    | 80            | 70                     |
| 10              | DMSO        | 0.46                    | 100           | 82                     |
| 11              | DMSO        | 0.46                    | 110           | 66                     |
| 12 <sup>c</sup> | DMSO        | 0.46                    | 100           | 58                     |
| 13              | DMSO        | 0.23                    | 100           | 55                     |
| 14              | DMSO        | 0.69                    | 100           | 57                     |
| 15 <sup>d</sup> | DMSO        | 7.8                     | 100           | 70                     |

<sup>a</sup>Reaction conditions: **1a** (0.2 mmol), <sup>t</sup>BuONO (**2**, 3.5 equiv.) and DMSO (3 mL) under air conditions for 5 h.

<sup>b</sup>Isolated yield. <sup>c</sup>Under Ar atmosphere. <sup>d</sup>**1a** (1.54 g, 4 mmol).

**Table S2. Optimization of the Reaction Conditions for Forming 5a<sup>a</sup>**

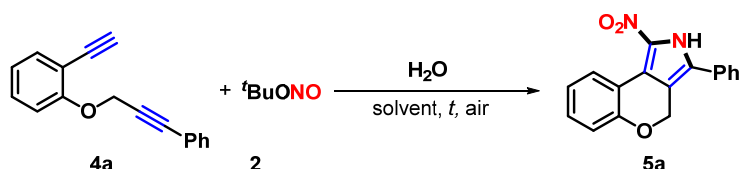

| entry | solvent | H <sub>2</sub> O (mmol) | <i>t</i> (°C) | yield (%) <sup>b</sup> |
|-------|---------|-------------------------|---------------|------------------------|
| 1     | DMSO    | 0.46                    | 100           | 40                     |
| 2     | DMSO    | 0.46                    | 70            | 42                     |
| 4     | DMSO    | 0.46                    | 50            | 48                     |
| 5     | DMSO    | 0.46                    | 30            | trace                  |

|   |             |      |    |       |
|---|-------------|------|----|-------|
| 6 | THF         | 0.46 | 50 | 64    |
| 7 | Toluene     | 0.46 | 50 | trace |
| 8 | 1,4-dioxane | 0.46 | 50 | 20    |
| 9 | MeCN        | 0.46 | 50 | 40    |

<sup>a</sup> Reaction conditions: **4** (0.2 mmol), <sup>t</sup>BuONO (**2**, 3.5 equiv), and solvent (3 mL) under air conditions for 8 h.

**Table S3. Optimization of the Reaction Conditions for Forming 7a<sup>a</sup>**

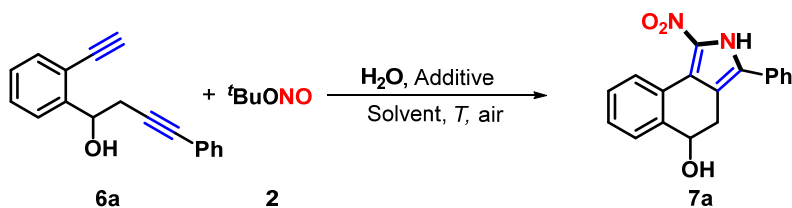

| entry | solvent     | H <sub>2</sub> O (mmol) | additive (equiv)                                                    | <i>t</i> (°C) | yield (%) <sup>b</sup> |
|-------|-------------|-------------------------|---------------------------------------------------------------------|---------------|------------------------|
| 1     | DMSO        | 0.46                    | -                                                                   | 100           | 25                     |
| 2     | DMSO        | 0.46                    | -                                                                   | 80            | 28                     |
| 3     | DMSO        | 0.46                    | -                                                                   | 60            | 31                     |
| 4     | THF         | 0.46                    | -                                                                   | 60            | 40                     |
| 5     | MeCN        | 0.46                    | -                                                                   | 60            | 32                     |
| 6     | DMF         | 0.46                    | -                                                                   | 60            | trace                  |
| 7     | Toluene     | 0.46                    | -                                                                   | 60            | 22                     |
| 8     | 1,4-dioxane | 0.46                    | -                                                                   | 60            | trace                  |
| 9     | THF         | 0.46                    | -                                                                   | 55            | 46                     |
| 10    | THF         | 0.46                    | -                                                                   | 50            | 43                     |
| 11    | THF         | 0.46                    | Co(NO <sub>3</sub> ) <sub>2</sub> •6H <sub>2</sub> O                | 55            | 60                     |
| 12    | THF         | 0.46                    | Co(C <sub>5</sub> H <sub>7</sub> O <sub>2</sub> ) <sub>2</sub>      | 100           | trace                  |
| 13    | THF         | 0.46                    | CH <sub>3</sub> CO <sub>2</sub> ) <sub>2</sub> Co•4H <sub>2</sub> O | 100           | 20                     |
| 14    | THF         | 0.46                    | CoCl <sub>2</sub>                                                   | 100           | 40                     |

<sup>a</sup> Reaction conditions: **6a** (0.2 mmol), <sup>t</sup>BuONO (**2**, 3.5 equiv), Co(NO<sub>3</sub>)<sub>2</sub>•6H<sub>2</sub>O (1.0 equiv) and solvent (3 mL) under air conditions for 8 h.

The presence of the nitro group provides great possibilities for late-stage modifications (Scheme S1). For instance, treatment of **3a** with Zn powder in the presence of HCl resulted in product **8** in 93% yield.<sup>1</sup>

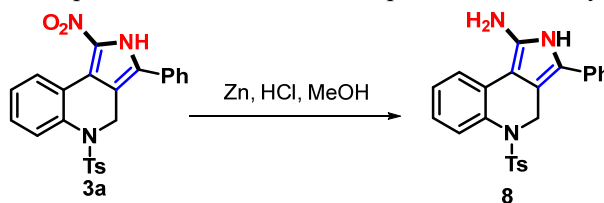

**Scheme S1. Synthetic Application of 3a**

To gain insight into this mechanism of the nitrative bicyclization, some controlled experiments were carried out (Scheme S2). Firstly, the formation of product **3a** was substantially inhibited and starting material **1a** was almost completely recovered with the existence of the dehydrating agents such as 4Å molecular sieve (4Å MS) and anhydrous magnesium, revealing that H<sub>2</sub>O is crucial for this transformation (Scheme S2a). Then, the reaction process was severely suppressed when 2,2,6,6-tetramethyl-piperidine-*N*-oxyl (TEMPO) as the radical scavenger was placed into the reaction system, in which TEMPO-NO adduct was detected by HR-MS analysis (Scheme S2b),

indicating that a radical process may be included. Next, an  $^{18}\text{O}$ -labeling experiment gave a mixture of  $^{18}\text{O}$ -**3a** and  $^{16}\text{O}$ -**3a** with a 4.5:1 ratio (Scheme S2c), thus demonstrating that one of the oxygen atoms of the nitro group may come from  $\text{H}_2\text{O}$  and oxygen in air. Moreover, 1,7-diyne **1gg** with two internal alkyne units was subjected with standard conditions. The reaction did not proceed with starting material **1gg** being recovered (Scheme S2d). These results showed that the terminal alkyne at the 1,7-diyne substrate is essential for this transformation.

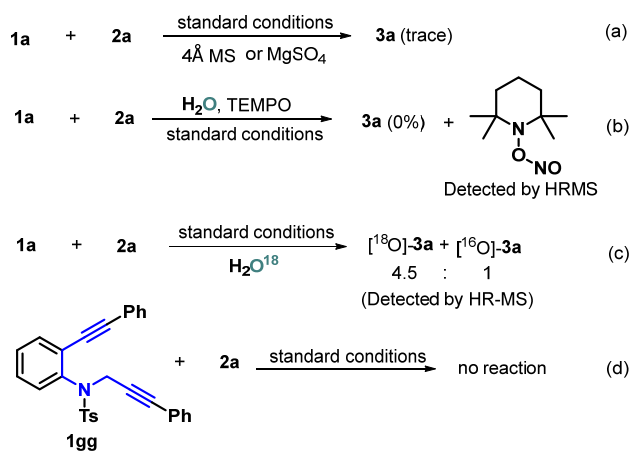

Scheme S2. Control Experiments

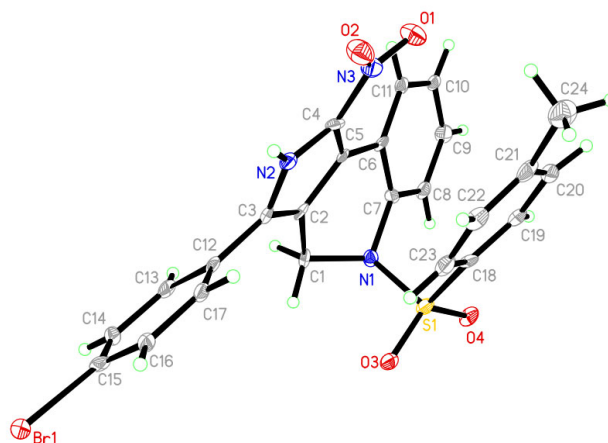

Figure S1 X-Ray Structure of **3l** (2141386)

### Radical-Trapping Experiment:

TEMPO as the radical trapping reagent — General procedure

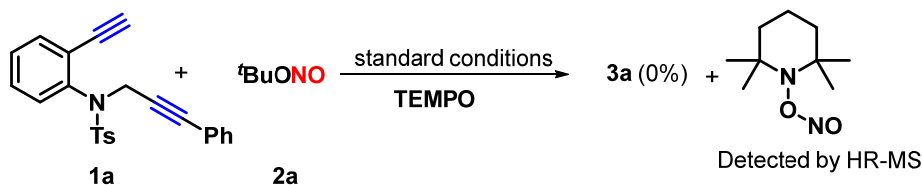

To a 25-mL Pressure tube under air conditions, 1,7-diyne **1a** (0.2 mmol, 77 mg), *tert*-butyl nitrite (**2a**, 0.7 mmol, 72.1mg, 3.5 equiv) and TEMPO (0.6 mmol, 94 mg) in DMSO (3.0 mL, about 0.46 mmol  $\text{H}_2\text{O}$  in 3mL DMSO) was stirred at 100 °C for 5 hours. The corresponding product (**3a**) was not detected according to TLC analysis. After completion of the reaction, the solution was detected by HR-MS analysis (Figure S2).



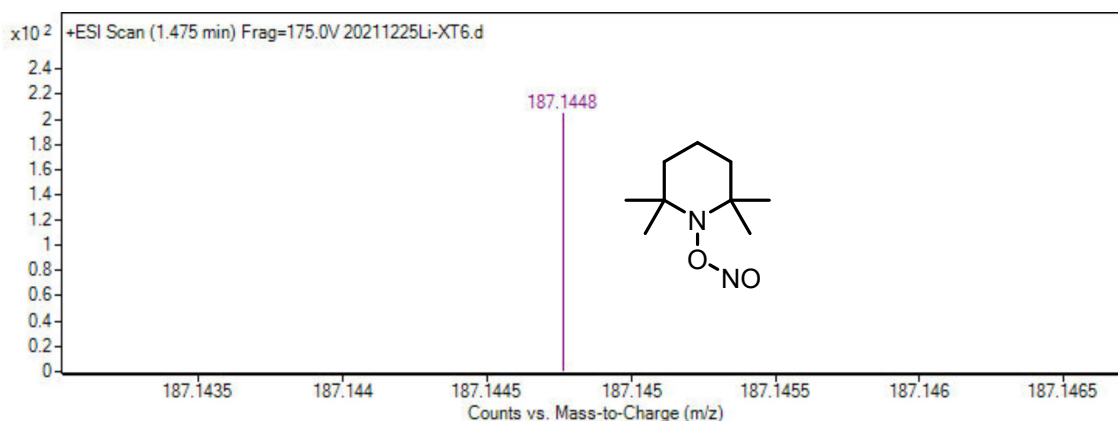

Figure S2. Copy of HR-MS Spectrum of TEMPO-NO adduct  $[M+H]^+$

## Intermediate Detection

To a 25-mL Pressure tube under air conditions, 1,7-diyne **1a** (0.2 mmol, 77 mg), *tert*-butyl nitrite (**2a**, 0.7 mmol, 72.1mg, 3.5 equiv), H<sub>2</sub>O (0.46 mmol, 8 mg,) and DMSO (3.0 mL, about 0.46 mmol H<sub>2</sub>O in 3mL DMSO) was stirred at 100 °C for 1 hours. Then the reaction system was directly measured by LC-MS analysis. The key intermediates **C** and **F** were detected by HR-MS (Figures S3-S4).

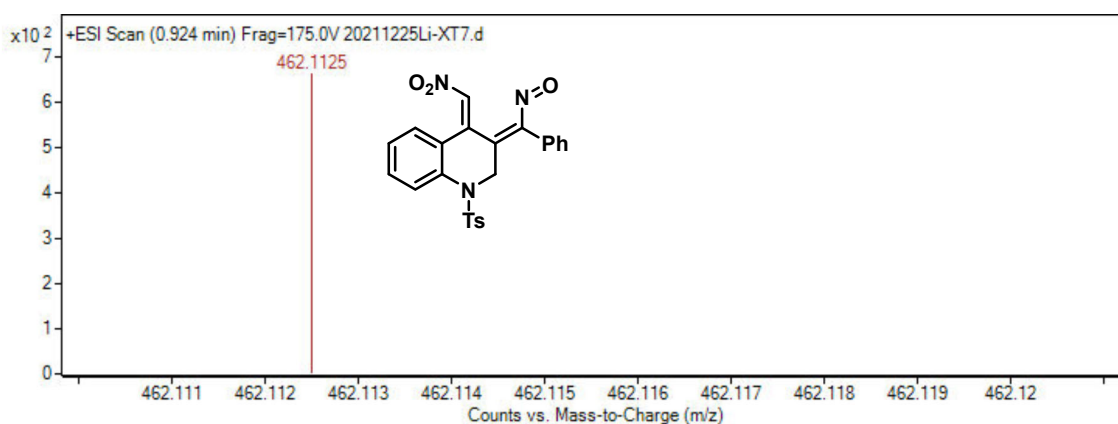

Figure S3. Copy of HR-MS Spectrum of Intermediate C  $[M+H]^+$

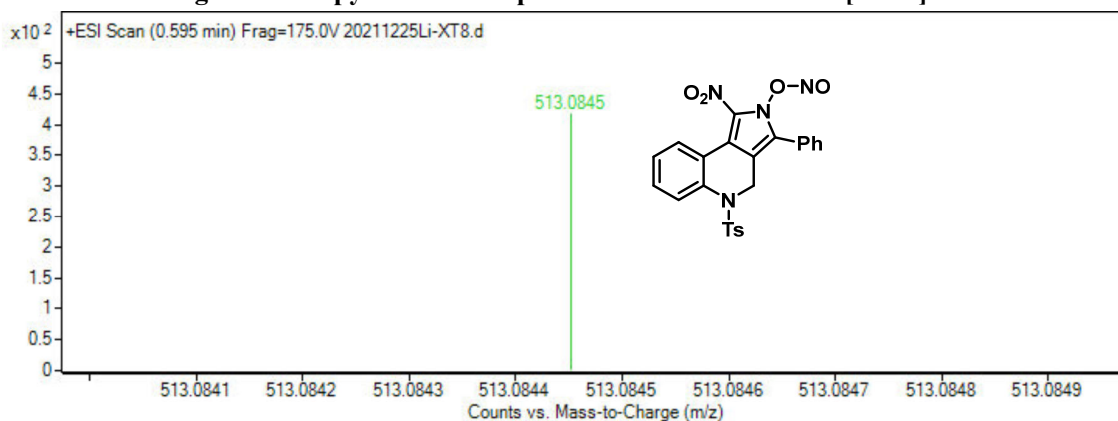

Figure S4. Copy of HR-MS Spectrum of Intermediate F  $[M+Na]^+$

## Mechanistic Investigations Control Experiment with H<sub>2</sub><sup>18</sup>O

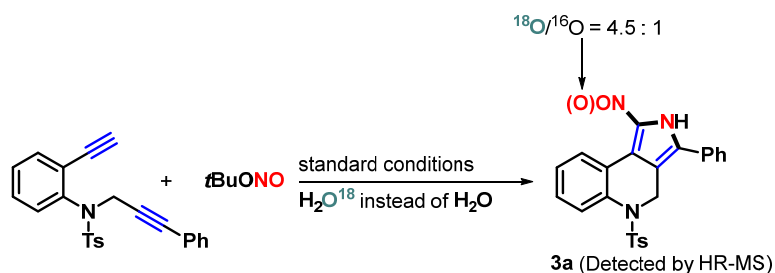

To a 25-mL Pressure tube under air conditions, 1,7-diyne **1a** (0.2 mmol, 77 mg), *tert*-butyl nitrite (**2**, 0.7 mmol, 72.1 mg, 3.5 equiv), H<sub>2</sub><sup>18</sup>O (0.46 mmol, 10 mg,) and DMSO (3.0 mL, about 0.46 mmol H<sub>2</sub>O in 3mL DMSO) was stirred at 100 °C for 5 hours until complete consumption of **1a** as monitored by TLC analysis. The product was detected by HRMS (Figure S5).

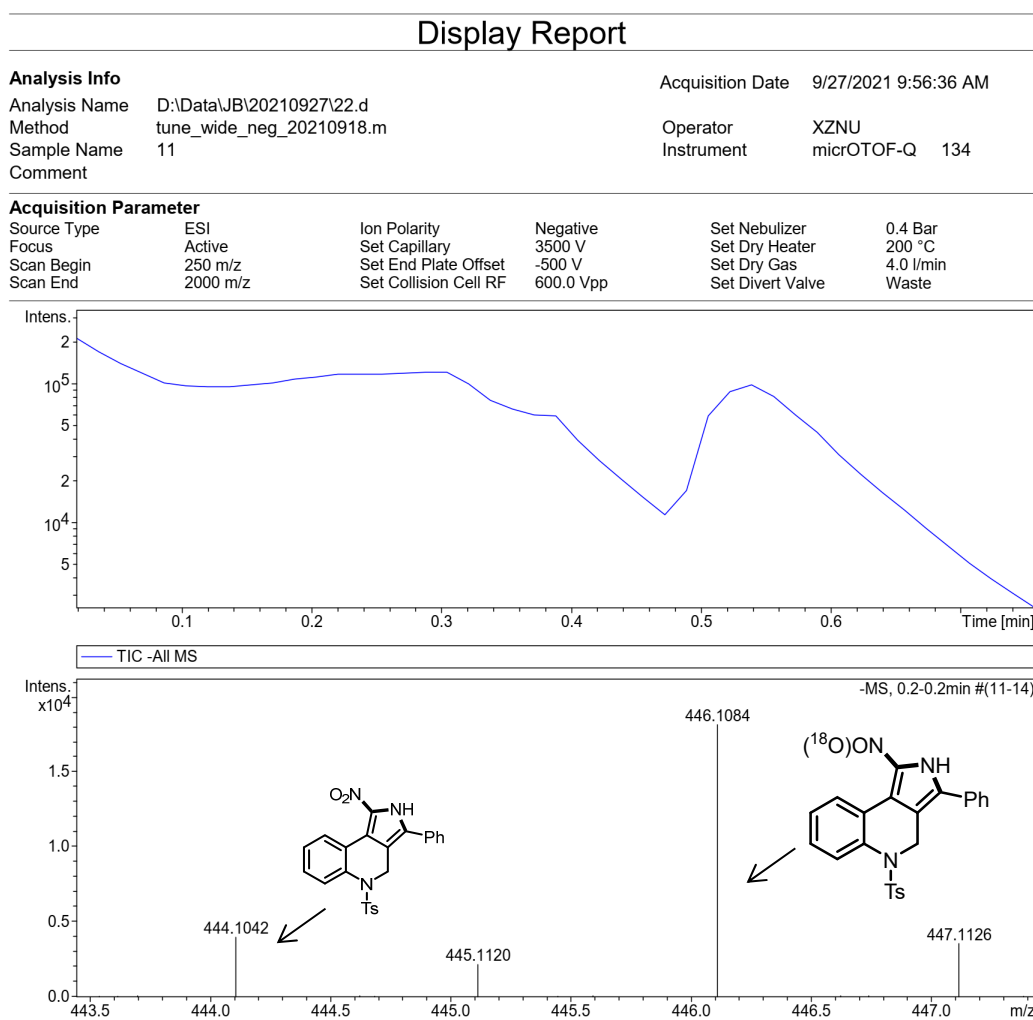

**Figure S5. Copy of HR-MS Spectrum of O<sup>18</sup>-containing Product 3a [M-H]<sup>-</sup>**

## General procedure for the synthesis of substrates 1a-1ff<sup>2</sup>

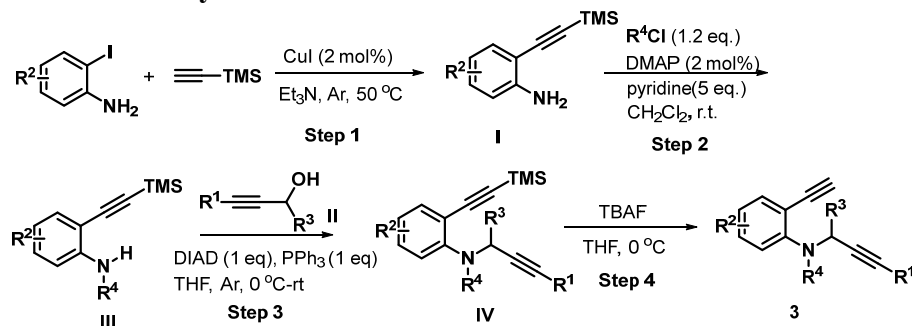

**Step 1:** Under Ar conditions, a mixture of 2-iodoaniline (10.0 mmol), CuI (38 mg, 2 mol %), PdCl<sub>2</sub>(PPh<sub>3</sub>)<sub>2</sub> (140 mg, 2 mol %), and Et<sub>3</sub>N (60 mL) was stirred at 50 °C in oil bath. Then, trimethylsilylacetylene (1.0 g, 10.5 mmol, 1.05 equiv) was dropwise added into the reaction system. The resulting reaction mixture was stirred until thin-layer chromatography (TLC) indicated complete consumption of the starting material., the residue was purified by chromatography on silica gel with petroleum ether/ethyl acetate as the eluent to afford compound **I** (90-95% yield).

**Step 2:** To a solution of **I** (1.0 equiv) in CH<sub>2</sub>Cl<sub>2</sub> (solvent, c = 0.2 M) was added pyridine (5.0 equiv), catalytic DMAP (2 mol %), and R<sup>4</sup>Cl (1.2 equiv) sequentially. After the reaction was completed at room temperature (monitored by TLC), the reaction mixture was quenched with 1 N HCl and extracted with CH<sub>2</sub>Cl<sub>2</sub>. The combined organic phase was washed with brine, dried over Na<sub>2</sub>SO<sub>4</sub>, filtered, and concentrated under reduced pressure. The resulting residue was subjected to flash column chromatography (eluent: hexanes/EtOAc) on silica gel to afford product **V**.

**Step 3:** To an 100-mL oven-dried flask containing a magnetic stirring bar, **III** (9 mmol), PPh<sub>3</sub> (2.358 g, 9 mmol), and **II** (9 mmol) in distilled THF (30 mL), DIAD (diisopropyl azodicarboxylate, 9 mmol) was added dropwise at 0 °C under nitrogen. Then the solution stirred for 30 minutes and the temperature was warmed to room temperature slowly. The reaction was quenched by adding aqueous sodium hydroxide solution (0.5 M, 50 mL). The mixture was then diluted with Et<sub>2</sub>O (50 mL) and washed with NaOH (0.5 M, 50 mL) and brine (50 mL) in sequence. The combined organic layers were dried with Na<sub>2</sub>SO<sub>4</sub>, and concentrated in vacuo after filtration. The residue was purified by flash chromatography on silica gel (eluted with petroleum ether/ethyl acetate = 10:1) to give pure compound **IV**.

**Step 4:** Under Ar conditions, compound **IV** (6 mmol), TBAF·3H<sub>2</sub>O (4.8 mmol, 1.56 g, 0.8 equiv) and THF (10 mL) were added into a dried flask. Then, the mixture was cooled down to 0 °C. After stirring at this temperature for 1.0 h, and it was quenched by saturated aqueous NH<sub>4</sub>Cl. Then the mixture was extracted with DCM and concentrated under vacuum. The residue was purified by flash column chromatography on silica gel (200-300 mesh) using mixtures of petroleum ether/ethyl acetate (5:1, v/v) afforded substrate **3** (78%-90% yield).

## General procedure for the synthesis of substrate 1gg

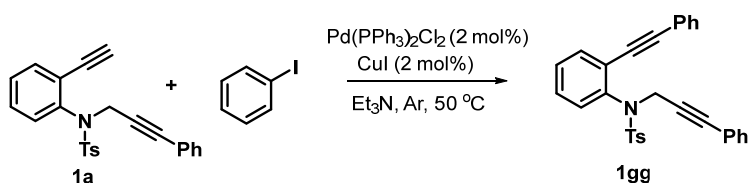

Under Ar conditions, a mixture of **1a** (5 mmol), CuI (19 mg, 2 mol %), PdCl<sub>2</sub>(PPh<sub>3</sub>)<sub>2</sub> (70 mg, 2 mol %), iodobenzene (1.1 equiv) and Et<sub>3</sub>N (20 mL) was stirred at 50 °C in oil bath. The resulting reaction mixture was stirred until thin-layer chromatography (TLC) indicated complete consumption of the starting material. The residue was purified by chromatography on silica gel with petroleum ether/ethyl acetate as the eluent to afford product **1gg** (1.84 g, 80% yield).

## Reference

1. B. M. Trost, D. A. Bringley and B. M. O'Keefe, *Org. Lett.* 2013, **15**, 5630.
2. (a) D. Wu, W.-J. Hao, Q. Rao, Y. Lu, S.-J. Tu and B. Jiang, *Chem. Commun.*, 2021, **57**, 1911. (b) M. He, N. Chen, T. Zhou, Q. Li, H.-G. Li, M. Lang, J. Wang, S.-Y. Peng, *Org. Lett.*, 2019, **21**, 9559.

***N*-(3-(4-ethylphenyl)prop-2-yn-1-yl)-*N*-(2-ethynylphenyl)-4-methylbenzenesulfonamide (1f)**

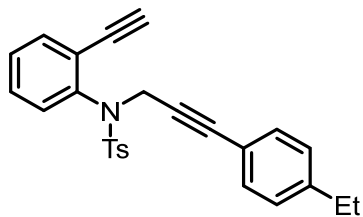

Isolation by column chromatography (PE/EA= 5/1 v/v) White solid; 2.85 g, 69% yield; <sup>1</sup>H NMR (400 MHz, CDCl<sub>3</sub>) (δ, ppm): 7.73 (d, *J* = 8.0 Hz, 2H), 7.57–7.51 (m, 1H), 7.34–7.28 (m, 2H), 7.25 (d, *J* = 5.2 Hz, 3H), 7.13–7.05 (m, 4H), 4.74 (s, 2H), 3.12 (s, 1H), 2.61 (q, *J* = 7.6 Hz, 2H), 2.41 (s, 3H), 1.20 (t, *J* = 7.6 Hz, 3H). <sup>13</sup>C NMR (100 MHz, CDCl<sub>3</sub>) (δ, ppm): 144.9, 143.6, 140.6, 137.2, 134.1, 131.5, 131.1, 129.5, 129.3, 128.6, 128.1, 127.8, 123.8, 119.7, 85.7, 82.8, 82.2, 80.0, 41.4, 28.8, 21.6, 15.4. HRMS (ESI -TOF) *m/z*: [M+Na]<sup>+</sup> Calcd for C<sub>26</sub>H<sub>23</sub>NO<sub>2</sub>SNa 436.1347; Found 436.1346

***N*-(3-(4-(tert-butyl)phenyl)prop-2-yn-1-yl)-*N*-(2-ethynylphenyl)-4-methylbenzenesulfonamide (1g)**

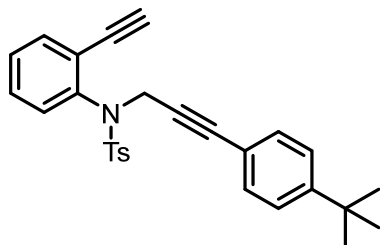

Isolation by column chromatography (PE/EA= 5/1 v/v) White solid; 2.87 g, 65% yield; <sup>1</sup>H NMR (400 MHz, CDCl<sub>3</sub>) (δ, ppm): 7.73 (d, *J* = 8.0 Hz, 2H), 7.57–7.51 (m, 1H), 7.34–7.28 (m, 3H), 7.27–7.23 (m, 4H), 7.13 (d, *J* = 8.0 Hz, 2H), 4.75 (s, 2H), 3.13 (s, 1H), 2.41 (s, 3H), 1.29 (s, 9H). <sup>13</sup>C NMR (100 MHz, CDCl<sub>3</sub>) (δ, ppm): 151.7, 143.6, 140.6, 137.2, 134.1, 131.3, 131.1, 129.5, 129.3, 128.6, 128.1, 125.2, 123.8, 119.5, 85.7, 82.8, 82.2, 80.0, 41.4, 34.8, 31.2, 21.6. HRMS (ESI -TOF) *m/z*: [M+Na]<sup>+</sup> Calcd for C<sub>28</sub>H<sub>27</sub>NO<sub>2</sub>SNa 464.166; Found 464.1636

***N*-(3-(2-chlorophenyl)prop-2-yn-1-yl)-*N*-(2-ethynylphenyl)-4-methylbenzenesulfonamide (1k)**

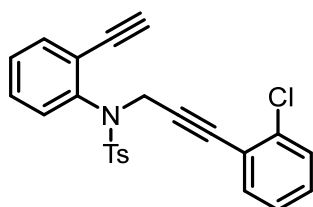

Isolation by column chromatography (PE/EA= 5/1 v/v) White solid; 2.51 g, 60% yield; <sup>1</sup>H NMR (400 MHz, CDCl<sub>3</sub>) (δ, ppm): 7.72 (d, *J* = 8.0 Hz, 2H), 7.57–7.51 (m, 1H), 7.36–7.28 (m, 4H), 7.26–7.18 (m, 4H), 7.13 (d, *J* = 7.2 Hz, 1H), 4.83 (s, 2H), 3.13 (s, 1H), 2.39 (s, 3H). <sup>13</sup>C NMR (100 MHz, CDCl<sub>3</sub>) (δ, ppm): 143.7, 140.4, 137.0, 135.8, 134.2, 133.5, 131.3, 129.5, 129.5, 129.4, 129.2, 128.7, 128.1, 126.4, 123.7, 122.4, 88.8, 82.3, 82.3, 80.0, 41.4, 21.6. HRMS (ESI -TOF) *m/z*: [M+Na]<sup>+</sup> Calcd for C<sub>24</sub>H<sub>18</sub>ClNO<sub>2</sub>SNa 442.0644; Found 442.0641

***N*-(3-(4-cyanophenyl)prop-2-yn-1-yl)-*N*-(2-ethynylphenyl)-4-methylbenzenesulfonamide (1m)**

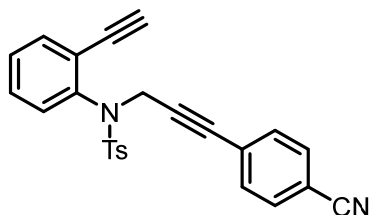

Isolation by column chromatography (PE/EA= 5/1 v/v) White solid; 2.30 g, 56% yield; <sup>1</sup>H NMR (400 MHz, CDCl<sub>3</sub>) (δ, ppm): 7.69 (d, *J* = 8.0 Hz, 2H), 7.54 (d, *J* = 8.0 Hz, 3H), 7.36–7.28 (m, 4H), 7.27–7.24 (m, 3H), 4.76 (s, 2H), 3.07 (s, 1H), 2.41 (s, 3H). <sup>13</sup>C NMR (100 MHz, CDCl<sub>3</sub>) (δ, ppm): 143.9, 140.4, 136.9, 134.3, 132.1, 132.0, 131.2, 129.6, 129.52, 128.9, 128.1, 127.4, 123.5, 118.4, 111.9, 88.4, 83.9, 82.4, 79.9, 41.3, 21.7. HRMS (ESI -TOF) *m/z*: [M+Na]<sup>+</sup> Calcd for C<sub>25</sub>H<sub>18</sub>N<sub>2</sub>O<sub>2</sub>SNa 433.0987; Found 433.0951

***N*-(3-cyclopropylprop-2-yn-1-yl)-*N*-(2-ethynylphenyl)-4-methylbenzenesulfonamide (1o)**

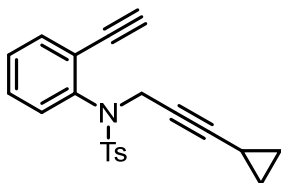

Isolation by column chromatography (PE/EA= 5/1 v/v) White solid; 1.99 g, 57% yield; <sup>1</sup>H NMR (400 MHz, CDCl<sub>3</sub>) (δ, ppm): 7.67 (d, *J* = 8.0 Hz, 2H), 7.53–7.48 (m, 1H), 7.34–7.28 (m, 2H), 7.25 (d, *J* = 5.2 Hz, 2H), 7.20–7.15 (m, 1H), 4.46 (s, 2H), 3.06 (s, 1H), 2.43 (s, 3H), 1.14–0.98 (m, 1H), 0.67–0.60 (m, 2H), 0.45–0.39 (m, 2H). <sup>13</sup>C NMR (100 MHz, CDCl<sub>3</sub>) (δ, ppm): 143.5, 140.7, 137.3, 134.1, 131.2, 129.4, 129.2, 128.5, 128.1, 123.7, 89.4, 82.1, 80.0, 77.3, 69.4, 41.1, 21.7, 7.99, 0.1. HRMS (ESI -TOF) *m/z*: [M+Na]<sup>+</sup> Calcd for C<sub>21</sub>H<sub>19</sub>NO<sub>2</sub>SNa 372.1034; Found 372.1029

***N*-(2-ethynyl-3-methylphenyl)-4-methyl-*N*-(3-phenylprop-2-yn-1-yl)benzenesulfonamide (1p)**

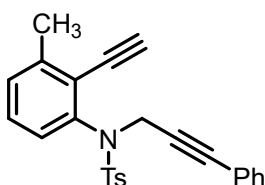

Isolation by column chromatography (PE/EA= 5/1 v/v) White solid; 1.40 g, 35% yield; <sup>1</sup>H NMR (400 MHz, CDCl<sub>3</sub>) (δ, ppm): 7.76 (d, *J* = 8.0 Hz, 2H), 7.25 (d, *J* = 12.0 Hz, 5H), 7.22–7.13 (m, 4H), 7.03 (d, *J* = 7.6 Hz, 1H), 4.73 (s, 2H), 3.39 (s, 1H), 2.46 (s, 3H), 2.41 (s, 3H). <sup>13</sup>C NMR (100 MHz, CDCl<sub>3</sub>) (δ, ppm): 143.5, 143.1, 140.8, 137.4, 131.5, 129.9, 129.4, 128.5, 128.4, 128.2, 128.1, 127.9, 123.8, 122.6, 86.5, 85.4, 83.8, 78.7, 41.4, 21.6, 21.1. HRMS (ESI -TOF) *m/z*: [M+Na]<sup>+</sup> Calcd for C<sub>25</sub>H<sub>21</sub>NO<sub>3</sub>SNa 422.1191; Found 422.1198.

***N*-(2-ethynyl-4-methoxyphenyl)-4-methyl-*N*-(3-phenylprop-2-yn-1-yl)benzenesulfonamide (1r)**

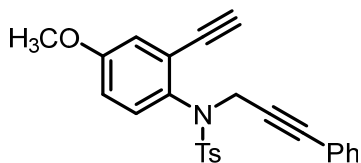

Isolation by column chromatography (PE/EA= 5/1 v/v) White solid; 2.24 g, 54% yield; <sup>1</sup>H NMR (400 MHz, CDCl<sub>3</sub>) (δ, ppm): 7.72 (d, *J* = 8.0 Hz, 2H), 7.28 (d, *J* = 7.2 Hz, 5H), 7.21 (d, *J* = 6.8 Hz, 2H), 7.14 (d, *J* = 8.8 Hz, 1H), 7.04 (d, *J* = 2.8 Hz, 1H), 6.83 (m, 1H), 4.73 (s, 2H), 3.79 (s, 3H), 3.10 (s, 1H), 2.41 (s, 3H). <sup>13</sup>C NMR (100 MHz, CDCl<sub>3</sub>) (δ, ppm): 159.2, 143.5, 137.2, 133.2, 132.0, 131.6, 129.5, 128.4, 128.2, 128.1, 124.8, 122.5, 118.5, 115.6, 85.4, 83.8, 81.9, 79.9, 55.6, 41.6, 21.6. HRMS (ESI -TOF) *m/z*: [M+Na]<sup>+</sup> Calcd for C<sub>25</sub>H<sub>21</sub>NO<sub>3</sub>SNa 438.1140; Found 438.1146.

***methyl 4-ethynyl-3-((4-methyl-*N*-(3-phenylprop-2-yn-1-yl)phenyl)sulfonamido)benzoate (1t)***

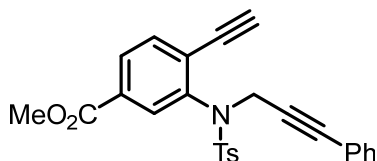

Isolation by column chromatography (PE/EA= 5/1 v/v) White solid; 2.44 g, 55% yield; <sup>1</sup>H NMR (400 MHz, CDCl<sub>3</sub>) (δ, ppm): 8.21 (d, *J* = 2.0 Hz, 1H), 8.00–7.96 (m, 1H), 7.71 (d, *J* = 8.0 Hz, 2H), 7.38 (d, *J* = 8.4 Hz, 1H), 7.29–7.24 (m, 5H),

7.19 (d,  $J = 7.2$  Hz, 2H), 4.77 (s, 2H), 3.92 (s, 3H), 3.17 (s, 1H), 2.41 (s, 3H).  $^{13}\text{C}$  NMR (100 MHz,  $\text{CDCl}_3$ ) ( $\delta$ , ppm): 165.6, 144.4, 144.0, 136.7, 135.4, 131.6, 131.2, 130.4, 130.3, 129.6, 128.6, 128.3, 128.1, 123.9, 122.2, 85.9, 83.2, 83.1, 79.1, 52.6, 41.2, 21.6. HRMS (ESI -TOF)  $m/z$ :  $[\text{M}+\text{Na}]^+$  Calcd for  $\text{C}_{26}\text{H}_{21}\text{NO}_4\text{SNa}$  466.1089; Found 466.1076

***N*-(2-ethynylphenyl)-*N*-(3-phenylprop-2-yn-1-yl)benzenesulfonamide (1v)**

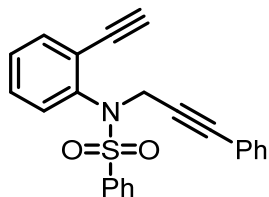

Isolation by column chromatography (PE/EA= 5/1 v/v) White solid; 2.78 g, 75% yield;  $^1\text{H}$  NMR (400 MHz,  $\text{CDCl}_3$ ) ( $\delta$ , ppm): 7.90 (d,  $J = 8.0$  Hz, 2H), 7.65–7.58 (m, 2H), 7.55–7.50 (m, 2H), 7.40–7.36 (m, 2H), 7.34–7.29 (m, 4H), 7.26 (d,  $J = 6.8$  Hz, 2H), 4.84 (s, 2H), 3.13 (s, 1H).  $^{13}\text{C}$  NMR (100 MHz,  $\text{CDCl}_3$ ) ( $\delta$ , ppm): 140.4, 140.1, 134.3, 132.9, 131.6, 131.4, 129.5, 129.0, 128.8, 128.6, 128.3, 128.1, 123.7, 122.5, 85.7, 83.5, 82.3, 79.9, 41.5. HRMS (ESI -TOF)  $m/z$ :  $[\text{M}+\text{Na}]^+$  Calcd for  $\text{C}_{23}\text{H}_{17}\text{NO}_2\text{SNa}$  394.0878; Found 394.0851

***N*-(2-ethynylphenyl)-4-methoxy-*N*-(3-phenylprop-2-yn-1-yl)benzenesulfonamide (1w)**

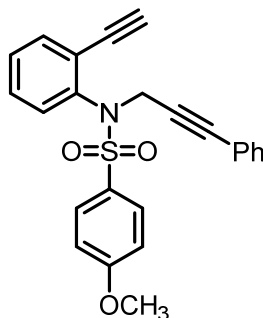

Isolation by column chromatography (PE/EA= 5/1 v/v) White solid; 3.05g, 76% yield;  $^1\text{H}$  NMR (400 MHz,  $\text{CDCl}_3$ ) ( $\delta$ , ppm): 7.83 (d,  $J = 8.8$  Hz, 2H), 7.62–7.58 (m, 1H), 7.39–7.36 (m, 2H), 7.35–7.30 (m, 4H), 7.26 (d,  $J = 7.2$  Hz, 2H), 6.97 (d,  $J = 8.8$  Hz, 2H), 4.80 (s, 2H), 3.88 (s, 3H), 3.20 (s, 1H).  $^{13}\text{C}$  NMR (100 MHz,  $\text{CDCl}_3$ ) ( $\delta$ , ppm): 163.2, 140.7, 134.2, 131.7, 131.6, 131.1, 130.3, 129.6, 129.4, 128.7, 128.5, 128.3, 123.8, 122.6, 114.3, 114.1, 85.6, 83.7, 82.3, 80.1, 55.7, 41.4. HRMS (ESI -TOF)  $m/z$ :  $[\text{M}+\text{Na}]^+$  Calcd for  $\text{C}_{24}\text{H}_{19}\text{NO}_3\text{SNa}$  424.0983; Found 424.0959

***4*-chloro-*N*-(2-ethynylphenyl)-*N*-(3-phenylprop-2-yn-1-yl)benzenesulfonamide (1x)**

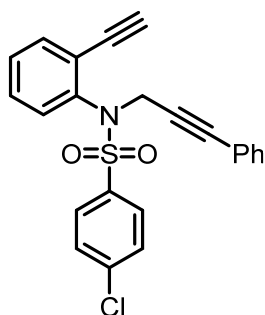

Isolation by column chromatography (PE/EA= 5/1 v/v) White solid; 2.59g, 64% yield;  $^1\text{H}$  NMR (400 MHz,  $\text{CDCl}_3$ ) ( $\delta$ , ppm): 7.77 (d,  $J = 8.8$  Hz, 2H), 7.58–7.53 (m, 1H), 7.43 (d,  $J = 8.4$  Hz, 2H), 7.36–7.32 (m, 2H), 7.30–7.24 (m, 4H), 7.20 (d,  $J = 7.6$  Hz, 2H), 4.76 (s, 2H), 3.11 (s, 1H).  $^{13}\text{C}$  NMR (100 MHz,  $\text{CDCl}_3$ ) ( $\delta$ , ppm): 140.1, 139.4, 138.6, 134.3, 131.5, 131.3, 129.5, 129.5, 129.2, 128.9, 128.6, 128.3, 123.5, 122.3, 85.8, 83.2, 82.4, 79.8, 41.6. HRMS (ESI -TOF)  $m/z$ :  $[\text{M}+\text{Na}]^+$  Calcd for  $\text{C}_{23}\text{H}_{16}\text{ClNO}_2\text{SNa}$  428.0488; Found 428.0486

***N*-(2-ethynylphenyl)-4-nitro-*N*-(3-phenylprop-2-yn-1-yl)benzenesulfonamide (1y)**

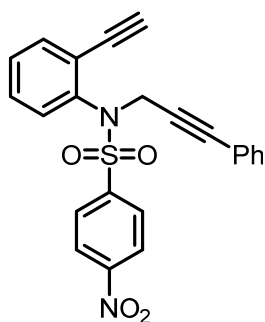

Isolation by column chromatography (PE/EA= 5/1 v/v) White solid; 2.37g, 57% yield;  $^1\text{H}$  NMR (400 MHz,  $\text{CDCl}_3$ ) ( $\delta$ , ppm): 8.28 (d,  $J = 8.0$  Hz, 2H), 8.00 (d,  $J = 7.6$  Hz, 2H), 7.58–7.52 (m, 1H), 7.40–7.35 (m, 2H), 7.34–7.26 (m, 3H), 7.26–7.19 (m, 3H), 4.80 (s, 2H), 3.05 (s, 1H).  $^{13}\text{C}$  NMR (100 MHz,  $\text{CDCl}_3$ ) ( $\delta$ , ppm): 150.2, 145.9, 139.6, 134.5, 131.5, 131.4, 129.8, 129.3, 129.3, 128.9, 128.5, 124.1, 123.3, 122.0, 86.2, 82.8, 82.6, 79.6, 41.9. HRMS (ESI -TOF)  $m/z$ :  $[\text{M}+\text{Na}]^+$  Calcd for  $\text{C}_{23}\text{H}_{16}\text{N}_2\text{O}_4\text{SNa}$  439.0728; Found 439.0725

***N*-(2-ethynylphenyl)-1-phenyl-*N*-(3-phenylprop-2-yn-1-yl)methanesulfonamide (1z)**

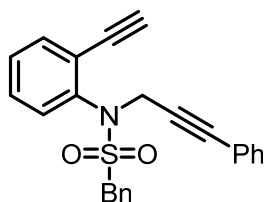

Isolation by column chromatography (PE/EA= 5/1 v/v) White solid; 2.70g, 70% yield;  $^1\text{H}$  NMR (400 MHz,  $\text{CDCl}_3$ ) ( $\delta$ , ppm): 7.63–7.58 (m, 1H), 7.52–7.48 (m, 2H), 7.38–7.29 (m, 10H), 7.24–7.20 (m, 1H), 4.69 (s, 2H), 4.51 (s, 2H), 3.39 (s, 1H).  $^{13}\text{C}$  NMR (100 MHz,  $\text{CDCl}_3$ ) ( $\delta$ , ppm): 140.8, 134.3, 131.9, 131.7, 131.2, 129.8, 128.8, 128.8, 128.7, 128.5, 123.4, 122.5, 85.8, 84.0, 83.0, 80.7, 60.2, 41.9. HRMS (ESI -TOF)  $m/z$ :  $[\text{M}+\text{H}]^+$  Calcd for  $\text{C}_{24}\text{H}_{20}\text{NO}_2\text{S}$  386.1215; Found 386.1211

***N*-(2-ethynylphenyl)-*N*-(3-phenylprop-2-yn-1-yl)cyclopropanesulfonamide (1aa)**

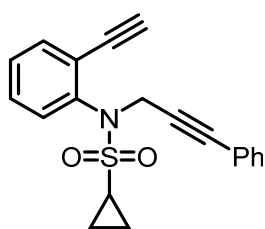

Isolation by column chromatography (PE/EA= 5/1 v/v) White solid; 2.28g, 68% yield;  $^1\text{H}$  NMR (400 MHz,  $\text{CDCl}_3$ ) ( $\delta$ , ppm): 7.64 (s, 1H), 7.60 (d,  $J = 8.8$  Hz, 1H), 7.42 (s, 1H), 7.38–7.27 (m, 6H), 4.77 (s, 2H), 3.35 (s, 1H), 2.71–2.63 (m, 1H), 1.16–1.10 (m, 2H), 1.02–0.96 (m, 2H).  $^{13}\text{C}$  NMR (100 MHz,  $\text{CDCl}_3$ ) ( $\delta$ , ppm): 140.8, 134.1, 132.0, 131.6, 129.7, 128.7, 128.5, 128.4, 123.5, 122.6, 85.5, 84.2, 82.5, 80.5, 41.5, 31.0, 6.1. HRMS (ESI -TOF)  $m/z$ :  $[\text{M}+\text{H}]^+$  Calcd for  $\text{C}_{20}\text{H}_{18}\text{NO}_2\text{S}$  336.1058; Found 336.1057

***N*-(2-ethynylphenyl)-*N*-(3-phenylprop-2-yn-1-yl)isobutyramide (1bb)**

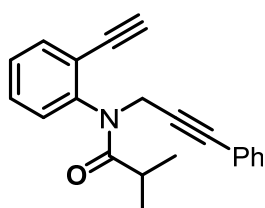



Isolation by column chromatography (PE/EA= 5/1 v/v) White solid; 2.14g, 71% yield;  $^1\text{H}$  NMR (400 MHz,  $\text{CDCl}_3$ ) ( $\delta$ , ppm): 7.62 (d,  $J = 7.6$  Hz, 1H), 7.47–7.35 (m, 3H), 7.31–7.25 (m, 5H), 5.27 (d,  $J = 17.6$  Hz, 1H), 4.31 (d,  $J = 17.2$  Hz, 1H), 3.27 (s, 1H), 2.41–2.33 (m, 1H), 1.10 (d,  $J = 6.4$  Hz, 3H), 1.03 (d,  $J = 6.4$  Hz, 3H).  $^{13}\text{C}$  NMR (100 MHz,  $\text{CDCl}_3$ ) ( $\delta$ , ppm): 177.0, 143.5, 133.9, 131.7, 130.1, 129.9, 128.5, 128.3, 128.2, 123.1, 122.4, 84.7, 84.5, 82.9, 79.7, 38.0, 32.0, 19.9, 19.5. HRMS (ESI -TOF)  $m/z$ :  $[\text{M}+\text{Na}]^+$  Calcd for  $\text{C}_{21}\text{H}_{19}\text{NONa}$  324.1364; Found 324.1351

***N*-(2-ethynylphenyl)-*N*-(3-phenylprop-2-yn-1-yl)cyclopropanecarboxamide (1cc)**

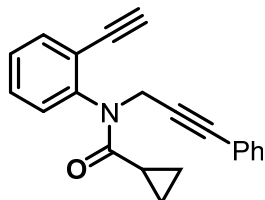

Isolation by column chromatography (PE/EA= 5/1 v/v) White solid; 2.03g, 68% yield;  $^1\text{H}$  NMR (400 MHz,  $\text{CDCl}_3$ ) ( $\delta$ , ppm): 7.63 (d,  $J = 7.6$  Hz, 1H), 7.50–7.42 (m, 2H), 7.40–7.35 (m, 1H), 7.32–7.29 (m, 2H), 7.28–7.25 (m, 3H), 5.27 (d,  $J = 17.2$  Hz, 1H), 4.36 (d,  $J = 17.6$  Hz, 1H), 3.27 (s, 1H), 1.27–1.21 (m, 1H), 1.10–1.01 (m, 2H), 0.72–0.59 (m, 2H).  $^{13}\text{C}$  NMR (100 MHz,  $\text{CDCl}_3$ ) ( $\delta$ , ppm): 173.3, 143.5, 133.9, 131.7, 130.5, 129.9, 128.4, 128.4, 128.3, 128.2, 123.1, 122.7, 84.7, 84.4, 82.8, 79.7, 38.1, 12.8, 9.1, 8.6. HRMS (ESI -TOF)  $m/z$ :  $[\text{M}+\text{H}]^+$  Calcd for  $\text{C}_{21}\text{H}_{18}\text{NO}$  300.1388; Found 300.1385

***N*-(2-ethynylphenyl)-*N*-(3-phenylprop-2-yn-1-yl)cyclohexanecarboxamide (1dd)**

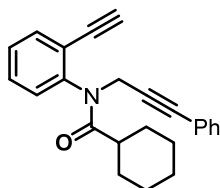

Isolation by column chromatography (PE/EA= 5/1 v/v) White solid; 2.28g, 67% yield;  $^1\text{H}$  NMR (400 MHz,  $\text{CDCl}_3$ ) ( $\delta$ , ppm): 7.62 (d,  $J = 6.8$  Hz, 1H), 7.47–7.35 (m, 3H), 7.31–7.23 (m, 6H), 5.26 (d,  $J = 17.62$  Hz, 1H), 4.29 (d,  $J = 17.2$  Hz, 1H), 3.25 (s, 1H), 2.09–2.00 (m, 1H), 1.78 (d,  $J = 12.8$  Hz, 1H), 1.70–1.44 (m, 6H), 1.23–1.12 (m, 1H), 1.06–0.87 (m, 2H).  $^{13}\text{C}$  NMR (100 MHz,  $\text{CDCl}_3$ ) ( $\delta$ , ppm): 175.9, 143.5, 133.9, 131.7, 130.1, 129.8, 128.5, 128.3, 128.2, 123.1, 122.4, 84.8, 84.4, 82.9, 79.7, 42.2, 37.8, 29.8, 29.2, 25.7, 25.5. HRMS (ESI -TOF)  $m/z$ :  $[\text{M}+\text{Na}]^+$  Calcd for  $\text{C}_{24}\text{H}_{23}\text{NONa}$  364.1677; Found 364.1690

***N*-(2-ethynylphenyl)-4-methyl-*N*-(3-phenylprop-2-yn-1-yl)benzamide (1ee)**

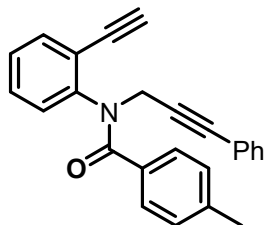

Isolation by column chromatography (PE/EA= 5/1 v/v) White solid; 2.51g, 72% yield;  $^1\text{H}$  NMR (400 MHz,  $\text{CDCl}_3$ ) ( $\delta$ , ppm): 7.48 (d,  $J = 6.4$  Hz, 1H), 7.35–7.28 (m, 4H), 7.27–7.16 (m, 6H), 6.96 (d,  $J = 7.2$  Hz, 2H), 5.37 (d,  $J = 16.8$  Hz, 1H), 4.58 (d,  $J = 17.2$  Hz, 1H), 3.37 (s, 1H), 2.24 (s, 3H).  $^{13}\text{C}$  NMR (100 MHz,  $\text{CDCl}_3$ ) ( $\delta$ , ppm): 170.7, 144.7, 140.2, 133.8, 132.7, 131.8, 131.8, 130.7, 129.6, 128.7, 128.4, 128.3, 127.8, 123.0, 121., 84.6, 83.4, 80.2, 53.6, 39.2, 21.5. HRMS (ESI -TOF)  $m/z$ :  $[\text{M}+\text{H}]^+$  Calcd for  $\text{C}_{25}\text{H}_{20}\text{NO}$  350.1545; Found 350.1543

**(1*R*,2*S*,5*R*)-2-isopropyl-5-methylcyclohexyl**

**74-(3-((*N*-(2-ethynylphenyl)-4-methylphenyl)sulfonamido)prop-1-yn-1-yl)benzoate (1ff)**

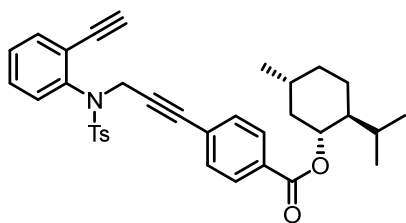

Isolation by column chromatography (PE/EA= 5/1 v/v) White solid; 2.83g, 50% yield;  $^1\text{H}$  NMR (400 MHz,  $\text{CDCl}_3$ ) ( $\delta$ , ppm): 7.97 (d,  $J = 8.4$  Hz, 2H), 7.77 (d,  $J = 8.0$  Hz, 2H), 7.62–7.57 (m, 1H), 7.41–7.36 (m, 2H), 7.33 (s, 2H), 7.30 (d,  $J = 7.8$  Hz, 3H), 5.01–4.92 (m, 1H), 4.82 (s, 2H), 3.16 (s, 1H), 2.47 (s, 3H), 2.15 (d,  $J = 11.2$  Hz, 1H), 2.01–1.93 (m, 1H), 1.78 (d,  $J = 11.6$  Hz, 2H), 1.69–1.58 (m, 3H), 1.18 (s, 2H), 1.02–0.93 (m, 7H), 0.83 (d,  $J = 6.8$  Hz, 3H).  $^{13}\text{C}$  NMR (100 MHz,  $\text{CDCl}_3$ ) ( $\delta$ , ppm): 165.5, 143.7, 140.5, 137.0, 134.2, 131.4, 131.1, 130.5, 129.5, 129.4, 129.4, 128.7, 128.1, 126.9, 123.7, 86.53, 84.9, 82.3, 79.9, 75.2, 47.3, 41.3, 41.0, 34.3, 31.5, 26.6, 23.7, 22.1, 21.6, 20.8, 16.6.

HRMS (ESI -TOF)  $m/z$ :  $[\text{M}+\text{H}]^+$  Calcd for  $\text{C}_{35}\text{H}_{38}\text{NO}_4\text{S}$  568.2522; Found 568.2519

#### 4-methyl-N-(2-(phenylethynyl)phenyl)-N-(3-phenylprop-2-yn-1-yl)benzenesulfonamide (1gg)

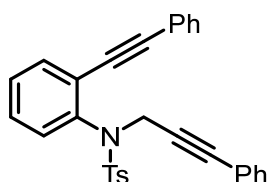

Isolation by column chromatography (PE/EA= 5/1 v/v) White solid; 1.84 g, 80% yield;  $^1\text{H}$  NMR (400 MHz,  $\text{CDCl}_3$ ) ( $\delta$ , ppm): 7.75 (d,  $J = 8.0$  Hz, 2H), 7.57 (d,  $J = 9.2$  Hz, 1H), 7.45–7.29 (m, 10H), 7.23 (d,  $J = 7.6$  Hz, 3H), 7.15 (d,  $J = 8.0$  Hz, 2H), 4.83 (s, 2H), 2.27 (s, 3H).  $^{13}\text{C}$  NMR (100 MHz,  $\text{CDCl}_3$ ) ( $\delta$ , ppm): 143.5, 139.9, 137.4, 133.4, 132.1, 131.8, 131.7, 131.6, 129.7, 129.6, 128.9, 128.7, 128.6, 128.6, 128.4, 128.3, 128.2, 127.9, 127.3, 124.3, 122.9, 122.6, 94.5, 86.0, 85.4, 83.8, 51.7, 41.2, 21.5. HRMS (ESI -TOF)  $m/z$ :  $[\text{M}+\text{H}]^+$  Calcd for  $\text{C}_{30}\text{H}_{24}\text{NO}_2\text{S}$  462.1528; Found 462.1524

### General Procedure for the Synthesis of Product 3.

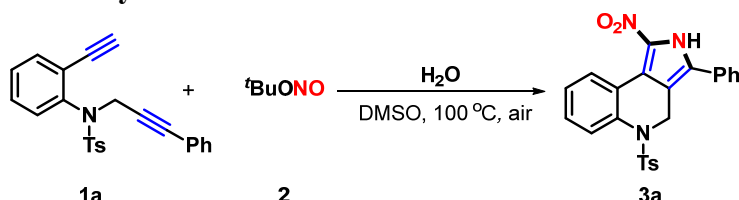

To a pressure tube were added 1,7-diyne **1a** (0.2 mmol, 77 mg), *tert*-butyl nitrite (**2**, 0.7 mmol, 72.1 mg, 3.5 equiv), and DMSO (3 mL, about 0.46 mmol  $\text{H}_2\text{O}$  in 3 mL). Then the mixture was stirred at 100 °C (metal bath temperature) for 8 h until complete consumption of starting material as monitored by TLC. After the reaction was finished, the reaction mixture was cooled to room temperature, diluted in ethyl acetate, and washed with  $\text{H}_2\text{O}$ . The aqueous phase was re-extracted with ethyl acetate. The combined organic extracts were dried over  $\text{Na}_2\text{SO}_4$  and concentrated in vacuum, and the resulting residue was purified by silica gel column chromatography (eluent, petroleum ether/ethyl acetate = 10:1) to afford the desired product **3a** as yellow solid in 82% yield.

#### 1-nitro-3-phenyl-5-tosyl-4,5-dihydro-2H-pyrrolo[3,4-c]quinoline (3a)

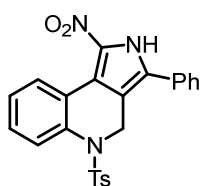

Isolation by column chromatography (PE/EA= 10/1 v/v) Yellow solid; 73.0 mg, 82% yield; mp: 240-241 °C; <sup>1</sup>H NMR (400 MHz, CDCl<sub>3</sub>) (δ, ppm): 9.24 (s, 1H), 8.27 (d, *J* = 7.2 Hz, 1H), 7.81 (d, *J* = 7.6 Hz, 1H), 7.63–7.43 (m, 7H), 6.90–6.80 (m, 4H), 4.85 (s, 2H), 2.25 (s, 3H). <sup>13</sup>C NMR (100 MHz, CDCl<sub>3</sub>) (δ, ppm): 143.7, 136.5, 133.8, 131.4, 130.2, 130.0, 129.9, 129.2, 128.6, 128.5, 128.4, 128.0, 127.1, 127.0, 125.5, 119.68, 117.0, 43.5, 21.3. IR (KBr, ν, cm<sup>-1</sup>): 3262, 1596, 1473, 1397, 1244, 1154, 1052, 844, 775; HRMS (ESI -TOF) *m/z*: [M+H]<sup>+</sup> Calcd for C<sub>24</sub>H<sub>20</sub>N<sub>3</sub>O<sub>4</sub>S 446.1175; Found 446.1176;

**1-nitro-3-(*p*-tolyl)-5-tosyl-4,5-dihydro-2H-pyrrolo[3,4-*c*]quinoline (3b)**

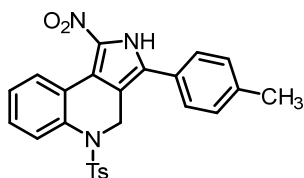

Isolation by column chromatography (PE/EA= 10/1 v/v) Yellow solid; 80.8 mg, 88% yield; mp: 260-261 °C; <sup>1</sup>H NMR (400 MHz, DMSO-*d*<sub>6</sub>) (δ, ppm): 12.99 (s, 1H), 8.16 (d, *J* = 7.6 Hz, 1H), 7.65 (d, *J* = 7.6 Hz, 1H), 7.55–7.48 (m, 4H), 7.43 (d, *J* = 8.0 Hz, 2H), 6.98 (d, *J* = 7.6 Hz, 2H), 6.61 (d, *J* = 8.0 Hz, 2H), 4.74 (s, 2H), 2.44 (s, 3H), 2.22 (s, 3H). <sup>13</sup>C NMR (100 MHz, DMSO-*d*<sub>6</sub>) (δ, ppm): 143.8, 139.6, 136.4, 133.6, 133.4, 132.6, 130.1, 129.5, 129.1, 128.8, 128.6, 128.5, 128.1, 126.5, 126.5, 126.1, 118.7, 116.6, 43.7, 21.5, 21.1. IR (KBr, ν, cm<sup>-1</sup>): 3258, 1472, 1395, 1275, 1156, 1053, 842, 749; HRMS (ESI -TOF) *m/z*: [M+H]<sup>+</sup> Calcd for C<sub>25</sub>H<sub>22</sub>N<sub>3</sub>O<sub>4</sub>S 460.1331; Found 460.1332;

**1-nitro-3-(*m*-tolyl)-5-tosyl-4,5-dihydro-2H-pyrrolo[3,4-*c*]quinoline (3c)**

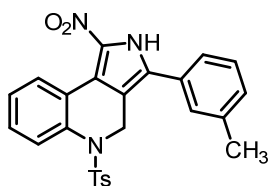

Isolation by column chromatography (PE/EA= 10/1 v/v) Yellow solid; 76.2 mg, 83% yield; mp: 218-219 °C; <sup>1</sup>H NMR (400 MHz, CDCl<sub>3</sub>) (δ, ppm): 9.26 (s, 1H), 8.26 (d, *J* = 7.6 Hz, 1H), 7.80 (d, *J* = 8.0 Hz, 1H), 7.52–7.43 (m, 3H), 7.35 (d, *J* = 7.6 Hz, 1H), 7.22 (d, *J* = 12.4 Hz, 2H), 6.88–6.81 (m, 4H), 4.84 (s, 2H), 2.50 (s, 3H), 2.25 (s, 3H). <sup>13</sup>C NMR (100 MHz, CDCl<sub>3</sub>) (δ, ppm): 143.6, 139.8, 136.5, 133.8, 131.7, 131.0, 129.9, 129.8, 129.2, 128.5, 128.4, 128.3, 127.9, 127.6, 127.0, 125.5, 124.1, 119.6, 116.9, 43.5, 21.7, 21.2. IR (KBr, ν, cm<sup>-1</sup>): 3447, 1637, 1473, 1350, 1221, 1163, 1056, 855, 764; HRMS (ESI -TOF) *m/z*: [M+H]<sup>+</sup> Calcd for C<sub>25</sub>H<sub>22</sub>N<sub>3</sub>O<sub>4</sub>S 460.1331; Found 460.1331;

**1-nitro-3-(*o*-tolyl)-5-tosyl-4,5-dihydro-2H-pyrrolo[3,4-*c*]quinoline (3d)**

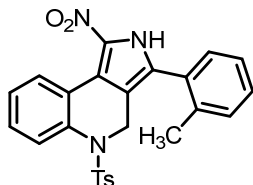

Isolation by column chromatography (PE/EA= 10/1 v/v) Yellow solid; 71.6 mg, 78% yield; mp: 224-225 °C; <sup>1</sup>H NMR (400 MHz, CDCl<sub>3</sub>) (δ, ppm): 9.17 (s, 1H), 8.29 (d, *J* = 7.6 Hz, 1H), 7.80 (d, *J* = 7.6 Hz, 1H), 7.52–7.38 (m, 5H), 7.33 (d, *J* = 7.6 Hz, 1H), 6.95–6.86 (m, 4H), 4.59 (s, 2H), 2.29 (s, 3H), 2.26 (s, 3H). <sup>13</sup>C NMR (100 MHz, CDCl<sub>3</sub>) (δ, ppm): 143.8, 136.9, 136.4, 134.0, 131.8, 131.7, 131.0, 130.4, 129.9, 129.3, 129.2, 128.5, 128.5, 128.0, 127.9, 127.0, 126.9, 125.8, 118.7, 118.4, 43.78, 21.27, 19.9. IR (KBr, ν, cm<sup>-1</sup>): 3263, 1596, 1474, 1392, 1273, 1162, 1059, 850, 765; HRMS (ESI -TOF) *m/z*: [M+H]<sup>+</sup> Calcd for C<sub>25</sub>H<sub>22</sub>N<sub>3</sub>O<sub>4</sub>S 460.1331; Found 460.1325;

**3-(3,4-dimethylphenyl)-1-nitro-5-tosyl-4,5-dihydro-2H-pyrrolo[3,4-*c*]quinoline (3e)**

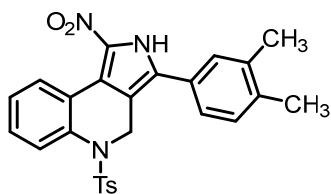

Isolation by column chromatography (PE/EA= 10/1 v/v) Yellow solid; 80.4 mg, 85% yield; mp: 238-239 °C; <sup>1</sup>H NMR (400 MHz, CDCl<sub>3</sub>) (δ, ppm): 9.23 (s, 1H), 8.26 (d, *J* = 7.6 Hz, 1H), 7.80 (d, *J* = 7.6 Hz, 1H), 7.52–7.43 (m, 2H), 7.33 (d, *J* = 7.6 Hz, 1H), 7.18 (d, *J* = 8.4 Hz, 2H), 6.88–6.80 (m, 4H), 4.83 (s, 2H), 2.40 (s, 3H), 2.38 (s, 3H), 2.24 (s, 3H). <sup>13</sup>C NMR (100 MHz, CDCl<sub>3</sub>) (δ, ppm): 143.7, 139.4, 138.5, 136.5, 133.9, 132.0, 131.8, 131.2, 129.9, 129.2, 128.6, 128.3, 128.1, 127.9, 127.0, 126.0, 125.7, 124.5, 119.8, 116.7, 43.6, 21.3, 20.2, 19.9. IR (KBr, ν, cm<sup>-1</sup>): 3445, 1636, 1471, 1352, 1267, 1164, 1056, 855, 749; HRMS (ESI -TOF) *m/z*: [M+H]<sup>+</sup> Calcd for C<sub>26</sub>H<sub>24</sub>N<sub>3</sub>O<sub>4</sub>S 474.1488; Found 474.1487;

### 3-(4-ethylphenyl)-1-nitro-5-tosyl-4,5-dihydro-2H-pyrrolo[3,4-c]quinoline (3f)

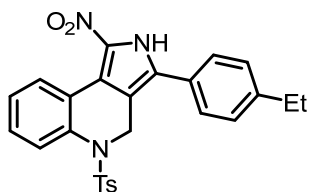

Isolation by column chromatography (PE/EA= 10/1 v/v) Yellow solid; 80.4 mg, 85% yield; mp: 213-214 °C; <sup>1</sup>H NMR (400 MHz, CDCl<sub>3</sub>) (δ, ppm): 9.21 (s, 1H), 8.27 (d, *J* = 7.6 Hz, 1H), 7.80 (d, *J* = 7.6 Hz, 1H), 7.52–7.40 (m, 4H), 7.36 (d, *J* = 8.0 Hz, 2H), 6.92–6.79 (m, 4H), 4.84 (s, 2H), 2.77 (q, *J* = 7.6 Hz, 2H), 2.24 (s, 3H), 1.33 (t, *J* = 7.6 Hz, 3H). <sup>13</sup>C NMR (100 MHz, CDCl<sub>3</sub>) (δ, ppm): 146.8, 143.7, 136.5, 133.9, 131.9, 131.8, 129.9, 129.5, 129.2, 128.6, 128.34, 127.9, 127.0, 127.0, 125.9, 125.6, 119.8, 116.8, 43.5, 28.9, 21.3, 15.4. IR (KBr, ν, cm<sup>-1</sup>): 3258, 1471, 1393, 1271, 1150, 1049, 834, 749; HRMS (ESI -TOF) *m/z*: [M+H]<sup>+</sup> Calcd for C<sub>26</sub>H<sub>24</sub>N<sub>3</sub>O<sub>4</sub>S 474.1488; Found 474.1489;

### 3-(4-(tert-butyl)phenyl)-1-nitro-5-tosyl-4,5-dihydro-2H-pyrrolo[3,4-c]quinoline (3g)

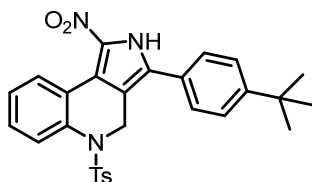

Isolation by column chromatography (PE/EA= 10/1 v/v) Yellow solid; 76.2 mg, 76% yield; mp: 166-167 °C; <sup>1</sup>H NMR (400 MHz, CDCl<sub>3</sub>) (δ, ppm): 9.19 (s, 1H), 8.27 (d, *J* = 8.0 Hz, 1H), 7.81 (d, *J* = 7.6 Hz, 1H), 7.61 (d, *J* = 8.0 Hz, 2H), 7.53–7.42 (m, 2H), 7.38 (d, *J* = 8.0 Hz, 2H), 6.90–6.79 (m, 4H), 4.86 (s, 2H), 2.25 (s, 3H), 1.42 (s, 9H). <sup>13</sup>C NMR (100 MHz, CDCl<sub>3</sub>) (δ, ppm): 153.7, 143.7, 136.5, 133.8, 131.9, 131.7, 129.9, 129.2, 128.6, 128.3, 128.0, 127.0, 127.0, 126.8, 125.7, 125.6, 119.8, 116.8, 43.5, 35.1, 31.2, 21.3. IR (KBr, ν, cm<sup>-1</sup>): 3218, 1476, 1395, 1242, 1165, 1059, 838, 765; HRMS (ESI -TOF) *m/z*: [M+H]<sup>+</sup> Calcd for C<sub>28</sub>H<sub>28</sub>N<sub>3</sub>O<sub>4</sub>S 502.1801; Found 502.1799;

### 3-(4-methoxyphenyl)-1-nitro-5-tosyl-4,5-dihydro-2H-pyrrolo[3,4-c]quinoline (3h)

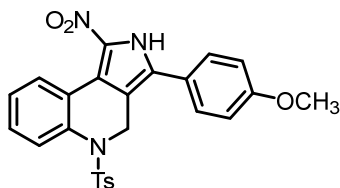

Isolation by column chromatography (PE/EA= 10/1 v/v) Yellow solid; 80.8 mg, 85% yield; mp: 227-228 °C; <sup>1</sup>H NMR (400 MHz, DMSO-*d*<sub>6</sub>) (δ, ppm): 12.92 (s, 1H), 8.17 (d, *J* = 7.6 Hz, 1H), 7.64 (d, *J* = 7.6 Hz, 1H), 7.58 (d, *J* = 8.4 Hz, 2H), 7.55–7.45 (m, 2H), 7.18 (d, *J* = 8.4 Hz, 2H), 6.97 (d, *J* = 8.0 Hz, 2H), 6.62 (d, *J* = 8.0 Hz, 2H), 4.73 (s, 2H), 3.89 (s, 3H), 2.22 (s, 3H). <sup>13</sup>C NMR (100 MHz, DMSO-*d*<sub>6</sub>) (δ, ppm): 160.6, 143.8, 136.4, 133.6, 133.4, 132.4, 130.2, 129.5,

129.1, 128.8, 128.5, 128.1, 126.6, 126.5, 121.3, 118.9, 116.3, 115.0, 55.9, 43.7, 21.1. IR (KBr,  $\nu$ ,  $\text{cm}^{-1}$ ): 3445, 1634, 1469, 1391, 1265, 1156, 832, 745; HRMS (ESI -TOF)  $m/z$ :  $[\text{M}+\text{H}]^+$  Calcd for  $\text{C}_{25}\text{H}_{22}\text{N}_3\text{O}_5\text{S}$  476.1280; Found 476.1281;

**3-(4-chlorophenyl)-1-nitro-5-tosyl-4,5-dihydro-2H-pyrrolo[3,4-c]quinoline (3i)**

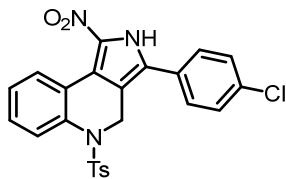

Isolation by column chromatography (PE/EA= 10/1 v/v) Yellow solid; 63.2 mg, 66% yield; mp: 224-225 °C;  $^1\text{H}$  NMR (400 MHz,  $\text{DMSO}-d_6$ ) ( $\delta$ , ppm): 13.14 (s, 1H), 8.16 (d,  $J$  = 8.0 Hz, 1H), 7.75–7.58 (m, 5H), 7.56–7.46 (m, 2H), 6.98 (d,  $J$  = 8.0 Hz, 2H), 6.62 (d,  $J$  = 8.0 Hz, 2H), 4.73 (s, 2H), 2.21 (s, 3H).  $^{13}\text{C}$  NMR (100 MHz,  $\text{DMSO}-d_6$ ) ( $\delta$ , ppm): 144.0, 136.5, 134.7, 133.7, 133.0, 131.8, 130.5, 129.7, 129.2, 129.0, 128.6, 128.3, 127.8, 126.6, 126.4, 118.6, 117.3, 43.7, 21.2. IR (KBr,  $\nu$ ,  $\text{cm}^{-1}$ ): 3459, 1471, 1338, 1262, 1161, 1016, 800, 764; HRMS (ESI -TOF)  $m/z$ :  $[\text{M}+\text{H}]^+$  Calcd for  $\text{C}_{24}\text{H}_{19}\text{ClN}_3\text{O}_4\text{S}$  480.0785; Found 480.0781;

**3-(3-chlorophenyl)-1-nitro-5-tosyl-4,5-dihydro-2H-pyrrolo[3,4-c]quinoline (3j)**

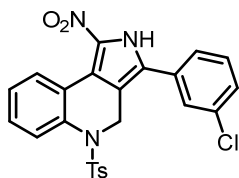

Isolation by column chromatography (PE/EA= 10/1 v/v) Yellow solid; 71.9 mg, 75% yield; mp: 223-224 °C;  $^1\text{H}$  NMR (400 MHz,  $\text{CDCl}_3$ ) ( $\delta$ , ppm): 9.28 (s, 1H), 8.26 (d,  $J$  = 8.0 Hz, 1H), 7.81 (d,  $J$  = 7.6 Hz, 1H), 7.56–7.45 (m, 4H), 7.38 (s, 1H), 7.34 (d,  $J$  = 6.4 Hz, 1H), 6.89–6.81 (m, 4H), 4.82 (s, 2H), 2.25 (s, 3H).  $^{13}\text{C}$  NMR (100 MHz,  $\text{CDCl}_3$ ) ( $\delta$ , ppm): 143.8, 136.5, 136.0, 133.8, 131.2, 130.2, 130.1, 130.0, 129.5, 129.2, 128.5, 128.3, 128.0, 126.9, 125.2, 125.2, 119.4, 117.5, 43.3, 21.2. IR (KBr,  $\nu$ ,  $\text{cm}^{-1}$ ): 3054, 1563, 1470, 1304, 1265, 1160, 1056, 847, 766; HRMS (ESI -TOF)  $m/z$ :  $[\text{M}+\text{H}]^+$  Calcd for  $\text{C}_{24}\text{H}_{19}\text{ClN}_3\text{O}_4\text{S}$  480.0785; Found 480.0783;

**3-(2-chlorophenyl)-1-nitro-5-tosyl-4,5-dihydro-2H-pyrrolo[3,4-c]quinoline (3k)**

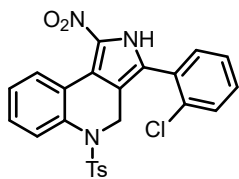

Isolation by column chromatography (PE/EA= 10/1 v/v) Yellow solid; 70.9 mg, 74% yield; mp: 217-218 °C;  $^1\text{H}$  NMR (400 MHz,  $\text{CDCl}_3$ ) ( $\delta$ , ppm): 9.56 (s, 1H), 8.25 (d,  $J$  = 7.6 Hz, 1H), 7.81 (d,  $J$  = 7.2 Hz, 1H), 7.63–7.58 (m, 1H), 7.53–7.43 (m, 4H), 7.37–7.32 (m, 1H), 6.91 (d,  $J$  = 8.0 Hz, 2H), 6.85 (d,  $J$  = 8.0 Hz, 2H), 4.71 (s, 2H), 2.25 (s, 3H).  $^{13}\text{C}$  NMR (100 MHz,  $\text{CDCl}_3$ ) ( $\delta$ , ppm): 143.8, 136.4, 133.7, 132.6, 132.0, 131.4, 131.4, 131.1, 129.9, 129.2, 128.6, 128.5, 128.0, 127.9, 127.9, 127.0, 125.6, 119.3, 118.5, 44.1, 21.2. IR (KBr,  $\nu$ ,  $\text{cm}^{-1}$ ): 3272, 1596, 1470, 1306, 1238, 1163, 1059, 848, 764; HRMS (ESI -TOF)  $m/z$ :  $[\text{M}+\text{H}]^+$  Calcd for  $\text{C}_{24}\text{H}_{19}\text{ClN}_3\text{O}_4\text{S}$  480.0785; Found 480.0782;

**3-(4-bromophenyl)-1-nitro-5-tosyl-4,5-dihydro-2H-pyrrolo[3,4-c]quinoline (3l)**

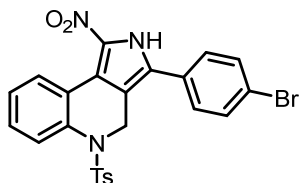

Isolation by column chromatography (PE/EA= 10/1 v/v) Yellow solid; 64.9 mg, 62% yield; mp: 245-246 °C; <sup>1</sup>H NMR (400 MHz, DMSO-*d*<sub>6</sub>) (δ, ppm): 13.14 (s, 1H), 8.15 (d, *J* = 7.6 Hz, 1H), 7.83 (d, *J* = 8.0 Hz, 2H), 7.65 (d, *J* = 7.6 Hz, 1H), 7.58 (d, *J* = 8.4 Hz, 2H), 7.54–7.46 (m, 2H), 6.98 (d, *J* = 7.6 Hz, 2H), 6.62 (d, *J* = 8.0 Hz, 2H), 4.73 (s, 2H), 2.21 (s, 3H). <sup>13</sup>C NMR (100 MHz, DMSO-*d*<sub>6</sub>) (δ, ppm): 143.9, 136.5, 133.7, 133.1, 132.6, 131.8, 130.7, 129.7, 129.2, 129.0, 128.6, 128.3, 128.2, 126.6, 126.4, 123.5, 118.6, 117.3, 43.7, 21.2. IR (KBr, ν, cm<sup>-1</sup>): 3447, 1637, 1470, 1330, 1262, 1153, 1051, 843, 749; HRMS (ESI -TOF) *m/z*: [M+H]<sup>+</sup> Calcd for C<sub>24</sub>H<sub>19</sub>BrN<sub>3</sub>O<sub>4</sub>S 524.0280; Found 524.0279;

**4-(1-nitro-5-tosyl-4,5-dihydro-2H-pyrrolo[3,4-c]quinolin-3-yl)benzonitrile (3m)**

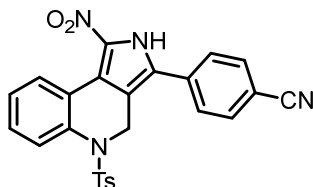

Isolation by column chromatography (PE/EA= 10/1 v/v) Yellow solid; 65.8 mg, 70% yield; mp: 209-210 °C; <sup>1</sup>H NMR (400 MHz, DMSO-*d*<sub>6</sub>) (δ, ppm): 13.30 (s, 1H), 8.15 (d, *J* = 7.6 Hz, 1H), 8.09 (d, *J* = 8.0 Hz, 2H), 7.81 (d, *J* = 8.4 Hz, 2H), 7.66 (d, *J* = 8.0 Hz, 1H), 7.56–7.47 (m, 2H), 6.98 (d, *J* = 8.0 Hz, 2H), 6.62 (d, *J* = 8.0 Hz, 2H), 4.76 (s, 2H), 2.22 (s, 3H). <sup>13</sup>C NMR (100 MHz, DMSO-*d*<sub>6</sub>) (δ, ppm): 143.9, 136.4, 133.6, 133.4, 133.2, 130.7, 129.7, 129.3, 129.1, 128.9, 128.5, 128.2, 126.5, 126.1, 119.0, 118.4, 118.3, 112.0, 43.6, 21.1. IR (KBr, ν, cm<sup>-1</sup>): 3447, 1636, 1474, 1399, 1316, 1152, 845, 764; HRMS (ESI -TOF) *m/z*: [M+H]<sup>+</sup> Calcd for C<sub>25</sub>H<sub>19</sub>N<sub>4</sub>O<sub>4</sub>S 471.1127; Found 471.1125;

**9-methyl-1-nitro-3-phenyl-5-tosyl-4,5-dihydro-2H-pyrrolo[3,4-c]quinoline (3p)**

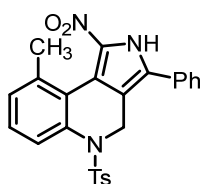

Isolation by column chromatography (PE/EA= 10/1 v/v) Yellow solid; 70.3 mg, 71% yield; mp: 152-153 °C; <sup>1</sup>H NMR (400 MHz, CDCl<sub>3</sub>) (δ, ppm): 9.30 (s, 1H), 7.70 (d, *J* = 8.0 Hz, 1H), 7.63–7.53 (m, 3H), 7.48 (d, *J* = 8.0 Hz, 2H), 7.44–7.40 (m, 1H), 7.33 (d, *J* = 8.0 Hz, 1H), 6.90–6.83 (m, 4H), 5.33 (d, *J* = 16.0 Hz, 1H), 4.18 (d, *J* = 16.0 Hz, 1H), 2.25 (s, 3H), 2.21 (s, 3H). <sup>13</sup>C NMR (100 MHz, CDCl<sub>3</sub>) (δ, ppm): 143.4, 138.1, 137.4, 134.4, 131.4, 130.2, 130.1, 129.9, 129.0, 128.5, 128.4, 127.1, 126.4, 126.1, 125.7, 119.6, 118.9, 43.9, 31.6, 22.7, 21.2, 20.7, 14.2. IR (KBr, ν, cm<sup>-1</sup>): 3340, 1733, 1470, 1275, 1163, 1090, 924, 749; HRMS (ESI -TOF) *m/z*: [M+Na]<sup>+</sup> Calcd for C<sub>25</sub>H<sub>21</sub>N<sub>3</sub>O<sub>4</sub>SNa 482.1150; Found 482.1161.

**8-methyl-1-nitro-3-phenyl-5-tosyl-4,5-dihydro-2H-pyrrolo[3,4-c]quinoline (3q)**

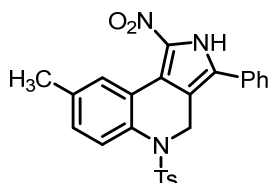

Isolation by column chromatography (PE/EA= 10/1 v/v) Yellow solid; 79.9 mg, 87% yield; mp: 138-139 °C; <sup>1</sup>H NMR (400 MHz, CDCl<sub>3</sub>) (δ, ppm): 9.23 (s, 1H), 8.07 (s, 1H), 7.68 (d, *J* = 8.0 Hz, 1H), 7.63–7.52 (m, 3H), 7.44 (d, *J* = 7.2 Hz, 2H), 7.31 (d, *J* = 8.4 Hz, 1H), 6.89–6.81 (m, 4H), 4.82 (s, 2H), 2.46 (s, 3H), 2.25 (s, 3H). <sup>13</sup>C NMR (100 MHz, CDCl<sub>3</sub>) (δ, ppm): 143.6, 137.9, 134.0, 133.9, 132.0, 131.4, 130.8, 130.1, 130.0, 128.9, 128.6, 128.3, 127.1, 127.0, 125.2, 119.9, 117.1, 43.5, 21.6, 21.3. IR (KBr, ν, cm<sup>-1</sup>): 3189, 1470, 1394, 1271, 1195, 1161, 1054, 860, 766; HRMS (ESI -TOF) *m/z*: [M+H]<sup>+</sup> Calcd for C<sub>25</sub>H<sub>22</sub>N<sub>3</sub>O<sub>4</sub>S 460.1331; Found 460.1326;

**8-methoxy-1-nitro-3-phenyl-5-tosyl-4,5-dihydro-2H-pyrrolo[3,4-c]quinoline (3r)**

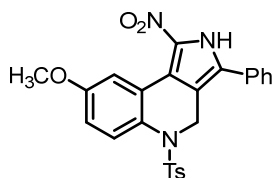

Isolation by column chromatography (PE/EA= 10/1 v/v) Yellow solid; 76.0 mg, 80% yield; mp: 131-132 °C; <sup>1</sup>H NMR (400 MHz, CDCl<sub>3</sub>) (δ, ppm): 9.26 (s, 1H), 7.84 (d, *J* = 2.8 Hz, 1H), 7.71 (d, *J* = 8.8 Hz, 1H), 7.63–7.53 (m, 3H), 7.44 (d, *J* = 7.6 Hz, 2H), 7.07–7.02 (m, 1H), 6.91–6.81 (m, 4H), 4.82 (s, 2H), 3.90 (s, 3H), 2.25 (s, 3H). <sup>13</sup>C NMR (100 MHz, CDCl<sub>3</sub>) (δ, ppm): 158.7, 143.6, 133.6, 131.4, 130.1, 130.1, 129.9, 129.2, 128.5, 128.3, 127.0, 126.4, 119.8, 1167.0, 116.2, 112.7, 55.7, 43.6, 21.2. IR (KBr, ν, cm<sup>-1</sup>): 3005, 1663, 1478, 1349, 1275, 1163, 1089, 812, 750; HRMS (ESI -TOF) *m/z*: [M+Na]<sup>+</sup> Calcd for C<sub>25</sub>H<sub>21</sub>N<sub>3</sub>O<sub>5</sub>SNa 498.1100; Found 498.1113.

**8-chloro-1-nitro-3-phenyl-5-tosyl-4,5-dihydro-2H-pyrrolo[3,4-c]quinoline (3s)**

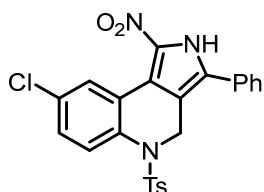

Isolation by column chromatography (PE/EA= 10/1 v/v) Yellow solid; 67.1 mg, 70% yield; mp: 230-231 °C; <sup>1</sup>H NMR (400 MHz, CDCl<sub>3</sub>) (δ, ppm): 9.29 (s, 1H), 8.23 (d, *J* = 8.8 Hz, 1H), 7.82 (s, 1H), 7.63–7.53 (m, 3H), 7.47–7.40 (m, 3H), 6.88 (s, 4H), 4.84 (s, 2H), 2.25 (s, 3H). <sup>13</sup>C NMR (100 MHz, CDCl<sub>3</sub>) (δ, ppm): 144.0, 137.7, 135.2, 133.8, 132.0, 131.6, 130.3, 130.0, 129.5, 129.3, 128.5, 128.4, 128.2, 127.1, 127.0, 124.0, 118.8, 116.7, 43.4, 21.3. IR (KBr, ν, cm<sup>-1</sup>): 3445, 1634, 1470, 1343, 1259, 1157, 1055, 849, 750; HRMS (ESI -TOF) *m/z*: [M+Na]<sup>+</sup> Calcd for C<sub>24</sub>H<sub>18</sub>ClN<sub>3</sub>O<sub>4</sub>SNa 502.0604; Found 502.0601;

**methyl 1-nitro-3-phenyl-5-tosyl-4,5-dihydro-2H-pyrrolo[3,4-c]quinoline-7-carboxylate (3t)**

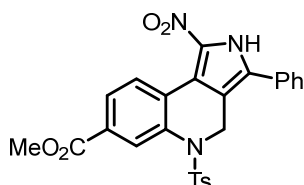

Isolation by column chromatography (PE/EA= 10/1 v/v) Yellow solid; 72.4 mg, 72% yield; mp: 203-204 °C; <sup>1</sup>H NMR (400 MHz, CDCl<sub>3</sub>) (δ, ppm): 9.35 (s, 1H), 8.94 (s, 1H), 8.16 (d, *J* = 8.8 Hz, 1H), 7.89 (d, *J* = 8.4 Hz, 1H), 7.63–7.55 (m, 3H), 7.45 (d, *J* = 7.6 Hz, 2H), 6.89–6.83 (m, 4H), 4.87 (s, 2H), 3.98 (s, 3H), 2.24 (s, 3H). <sup>13</sup>C NMR (100 MHz, CDCl<sub>3</sub>) (δ, ppm): 166.4, 144.0, 140.4, 133.9, 131.3, 130.8, 130.3, 130.0, 129.9, 129.5, 129.2, 128.6, 128.34, 127.1, 126.9, 125.5, 118.7, 116.9, 52.6, 43.4, 21.3. IR (KBr, ν, cm<sup>-1</sup>): 3445, 1698, 1471, 1353, 1267, 1161, 1038, 810, 746; HRMS (ESI -TOF) *m/z*: [M+Na]<sup>+</sup> Calcd for C<sub>26</sub>H<sub>21</sub>N<sub>3</sub>O<sub>6</sub>SNa 526.1049; Found 526.1043;

**4-methyl-1-nitro-3-phenyl-5-tosyl-4,5-dihydro-2H-pyrrolo[3,4-c]quinoline (3u)**

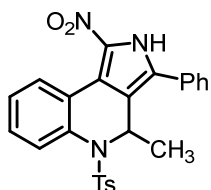

Isolation by column chromatography (PE/EA= 10/1 v/v) Yellow solid; 78.1 mg, 85% yield; mp: 204-205 °C; <sup>1</sup>H NMR (400 MHz, CDCl<sub>3</sub>) (δ, ppm): 9.25 (s, 1H), 8.29 (d, *J* = 8.0 Hz, 1H), 7.80 (d, *J* = 8.0 Hz, 1H), 7.63–7.43 (m, 7H), 6.82 (m, 4H), 5.58–5.51 (m, 1H), 2.23 (s, 3H), 1.34 (d, *J* = 7.2 Hz, 3H). <sup>13</sup>C NMR (100 MHz, CDCl<sub>3</sub>) (δ, ppm): 143.59, 133.96, 133.37, 132.05, 130.55, 130.46, 130.11, 130.02, 128.75, 128.36, 128.29, 127.86, 126.95, 126.83, 124.88,

122.12, 118.27, 48.76, 21.24, 21.04. IR (KBr,  $\nu$ ,  $\text{cm}^{-1}$ ): 3380, 1478, 1392, 1234, 1163, 1078, 1005, 896, 764; HRMS (ESI -TOF)  $m/z$ :  $[M+H]^+$  Calcd for  $\text{C}_{25}\text{H}_{22}\text{N}_3\text{O}_4\text{S}$  460.1331; Found 460.1330;

**1-nitro-3-phenyl-5-(phenylsulfonyl)-4,5-dihydro-2H-pyrrolo[3,4-c]quinoline (3v)**

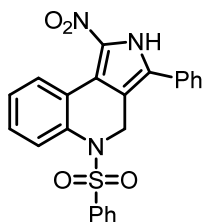

Isolation by column chromatography (PE/EA= 10/1 v/v) Yellow solid; 67.3 mg, 78% yield; mp: 205-206 °C;  $^1\text{H}$  NMR (400 MHz,  $\text{CDCl}_3$ ) ( $\delta$ , ppm): 9.27 (s, 1H), 8.28 (d,  $J = 8.0$  Hz, 1H), 7.82 (d,  $J = 7.6$  Hz, 1H), 7.62–7.54 (m, 3H), 7.52–7.41 (m, 4H), 7.32–7.27 (m, 1H), 7.10–7.05 (m, 2H), 6.98 (d,  $J = 8.0$  Hz, 2H), 4.86 (s, 2H).  $^{13}\text{C}$  NMR (100 MHz,  $\text{CDCl}_3$ ) ( $\delta$ , ppm): 137.2, 136.3, 132.5, 132.0, 131.3, 130.2, 130.0, 129.2, 128.5, 128.5, 128.0, 127.8, 127.1, 127.0, 125.4, 119.6, 117.1, 43.4. IR (KBr,  $\nu$ ,  $\text{cm}^{-1}$ ): 3425, 1636, 1474, 1350, 1268, 1165, 1088, 847, 766; HRMS (ESI -TOF)  $m/z$ :  $[M+H]^+$  Calcd for  $\text{C}_{23}\text{H}_{18}\text{N}_3\text{O}_4\text{S}$   $[M+H]^+$  432.1018; Found 432.1012;

**5-((4-methoxyphenyl)sulfonyl)-1-nitro-3-phenyl-4,5-dihydro-2H-pyrrolo[3,4-c]quinoline (3w)**

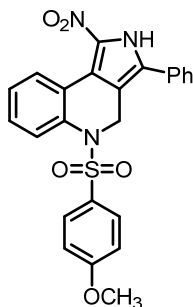

Isolation by column chromatography (PE/EA= 10/1 v/v) Yellow solid; 75.6 mg, 82% yield; mp: 209-210 °C;  $^1\text{H}$  NMR (400 MHz,  $\text{CDCl}_3$ ) ( $\delta$ , ppm): 9.31 (s, 1H), 8.30–8.26 (m, 1H), 7.80 (d,  $J = 8.0$  Hz, 1H), 7.61–7.53 (m, 3H), 7.51–7.42 (m, 4H), 6.89 (d,  $J = 9.2$  Hz, 2H), 6.52 (d,  $J = 8.8$  Hz, 2H), 4.84 (s, 2H), 3.72 (s, 3H).  $^{13}\text{C}$  NMR (100 MHz,  $\text{CDCl}_3$ ) ( $\delta$ , ppm): 162.9, 136.6, 132.1, 131.5, 130.2, 130.0, 129.4, 129.1, 128.6, 128.5, 127.9, 127.1, 125.5, 119.8, 117.2, 112.9, 55.8, 43.4. IR (KBr,  $\nu$ ,  $\text{cm}^{-1}$ ): 3347, 1593, 1474, 1346, 1267, 1155, 1021, 846, 766; HRMS (ESI -TOF)  $m/z$ :  $[M+Na]^+$  Calcd for  $\text{C}_{24}\text{H}_{19}\text{N}_3\text{O}_5\text{SNa}$  484.0943; Found 484.0941;

**5-((4-chlorophenyl)sulfonyl)-1-nitro-3-phenyl-4,5-dihydro-2H-pyrrolo[3,4-c]quinoline (3x)**

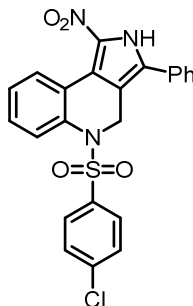

Isolation by column chromatography (PE/EA= 10/1 v/v) Yellow solid; 66.4 mg, 71% yield; mp: 222-223 °C;  $^1\text{H}$  NMR (400 MHz,  $\text{CDCl}_3$ ) ( $\delta$ , ppm): 9.42 (s, 1H), 8.31 (d,  $J = 7.6$  Hz, 1H), 7.80 (d,  $J = 7.6$  Hz, 1H), 7.63–7.55 (m, 3H), 7.53–7.46 (m, 2H), 7.43 (d,  $J = 7.2$  Hz, 2H), 7.05 (d,  $J = 8.0$  Hz, 2H), 6.91 (d,  $J = 8.4$  Hz, 2H), 4.85 (s, 2H).  $^{13}\text{C}$  NMR (100 MHz,  $\text{CDCl}_3$ ) ( $\delta$ , ppm): 139.3, 136.1, 135.4, 132.1, 131.2, 130.2, 130.0, 130.0, 129.2, 128.6, 128.3, 128.2, 128.1, 127.0, 125.2, 119.1, 116.7, 43.4. IR (KBr,  $\nu$ ,  $\text{cm}^{-1}$ ): 3418, 1634, 1583, 1474, 1395, 1357, 1243, 1166, 1090, 847, 765; HRMS (ESI -TOF)  $m/z$ :  $[M+Na]^+$  Calcd for  $\text{C}_{23}\text{H}_{16}\text{ClN}_3\text{O}_4\text{SNa}$  488.0448; Found 488.0446;



**1-nitro-5-((4-nitrophenyl)sulfonyl)-3-phenyl-4,5-dihydro-2H-pyrrolo[3,4-c]quinoline (3y)**

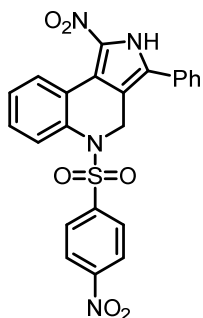

Isolation by column chromatography (PE/EA= 10/1 v/v) Yellow solid; 66.7 mg, 70% yield; mp: 244-245 °C; <sup>1</sup>H NMR (400 MHz, DMSO-*d*<sub>6</sub>) (δ, ppm): 13.22 (s, 1H), 8.17 (d, *J* = 7.6 Hz, 1H), 8.06 (d, *J* = 8.4 Hz, 2H), 7.70 (d, *J* = 7.6 Hz, 1H), 7.64 (d, *J* = 4.0 Hz, 4H), 7.61–7.52 (m, 3H), 7.00 (d, *J* = 8.4 Hz, 2H), 4.81 (s, 2H). <sup>13</sup>C NMR (100 MHz, DMSO-*d*<sub>6</sub>) (δ, ppm): 149.7, 141.7, 135.6, 133.2, 132.7, 130.0, 129.6, 129.0, 128.8, 128.55, 128.2, 126.3, 123.6, 118.5, 117.0, 44.0. IR (KBr, ν, cm<sup>-1</sup>): 3445, 1635, 1531, 1473, 1362, 1274, 1161, 848, 749; HRMS (ESI -TOF) *m/z*: [M+Na]<sup>+</sup> Calcd for C<sub>23</sub>H<sub>16</sub>N<sub>4</sub>O<sub>6</sub>SNa 499.0688; Found 499.0683;

**5-(benzylsulfonyl)-1-nitro-3-phenyl-4,5-dihydro-2H-pyrrolo[3,4-c]quinoline (3z)**

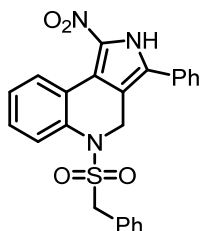

Isolation by column chromatography (PE/EA= 10/1 v/v) Yellow solid; 60.5 mg, 68% yield; mp: 250-251 °C; <sup>1</sup>H NMR (400 MHz, DMSO-*d*<sub>6</sub>) (δ, ppm): 13.35 (s, 1H), 8.41 (d, *J* = 8.4 Hz, 1H), 7.60–7.48 (m, 5H), 7.41–7.35 (m, 2H), 7.33–7.27 (m, 2H), 7.25–7.19 (m, 2H), 7.12 (d, *J* = 7.6 Hz, 2H), 4.64 (s, 2H), 4.35 (s, 2H). <sup>13</sup>C NMR (100 MHz, DMSO-*d*<sub>6</sub>) (δ, ppm): 136.7, 133.6, 132.3, 131.2, 129.7, 129.5, 129.4, 129.2, 129.1, 128.9, 128.6, 128.5, 126.6, 126.3, 124.9, 119.5, 119.2, 57.9, 43.1. IR (KBr, ν, cm<sup>-1</sup>): 3445, 1602, 1563, 1481, 1455, 1351, 1243, 1152, 1086, 901, 751; HRMS (ESI -TOF) *m/z*: [M+Na]<sup>+</sup> Calcd for C<sub>24</sub>H<sub>19</sub>N<sub>3</sub>O<sub>4</sub>SNa 468.0994; Found 468.0992;

**5-(cyclopropylsulfonyl)-1-nitro-3-phenyl-4,5-dihydro-2H-pyrrolo[3,4-c]quinoline (3aa)**

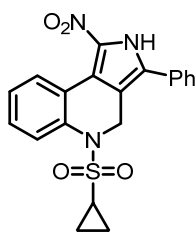

Isolation by column chromatography (PE/EA= 10/1 v/v) Yellow solid; 43.5 mg, 55% yield; mp: 230-231 °C; <sup>1</sup>H NMR (400 MHz, DMSO-*d*<sub>6</sub>) (δ, ppm): 13.45 (s, 1H), 8.51–8.47 (m, 1H), 7.67 (d, *J* = 7.6 Hz, 2H), 7.61–7.55 (m, 3H), 7.54 (d, *J* = 7.2 Hz, 1H), 7.50–7.44 (m, 2H), 4.75 (s, 2H), 1.92–1.86 (m, 1H), 0.55–0.48 (m, 2H), 0.41 (d, *J* = 11.2 Hz, 2H). <sup>13</sup>C NMR (100 MHz, DMSO-*d*<sub>6</sub>) (δ, ppm): 136.8, 133.7, 132.7, 129.8, 129.6, 129.5, 129.2, 128.9, 128.5, 128.4, 127.6, 126.0, 119.3, 119.1, 43.4, 28.8, 5.2. IR (KBr, ν, cm<sup>-1</sup>): 3448, 1637, 1559, 1474, 1389, 1266, 1146, 749; HRMS (ESI -TOF) *m/z*: [M+H]<sup>+</sup> Calcd for C<sub>20</sub>H<sub>18</sub>N<sub>3</sub>O<sub>4</sub>S 396.1018; Found 396.1018;

**2-methyl-1-(1-nitro-3-phenyl-2,4-dihydro-5H-pyrrolo[3,4-c]quinolin-5-yl)propan-1-one (3bb)**

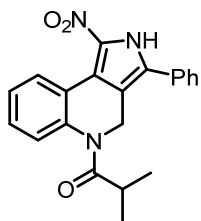

Isolation by column chromatography (PE/EA= 10/1 v/v) Yellow solid; 54.2 mg, 75% yield; mp: 211-212 °C; <sup>1</sup>H NMR (400 MHz, CDCl<sub>3</sub>) (δ, ppm): 9.78 (s, 1H), 8.60–8.55 (m, 1H), 7.56–7.48 (m, 4H), 7.46 (d, *J* = 7.2 Hz, 1H), 7.43–7.38 (m, 2H), 7.33 (s, 1H), 3.17–3.09 (m, 1H), 1.04 (s, 6H). <sup>13</sup>C NMR (100 MHz, CDCl<sub>3</sub>) (δ, ppm): 177.4, 138.3, 132.7, 131.5, 129.8, 129.6, 129.3, 129.0, 128.7, 127.3, 126.7, 125.2, 124.5, 120.9, 120.5, 39.0, 30.5, 19.9. IR (KBr, ν, cm<sup>-1</sup>): 3445, 1635, 1532, 1478, 1367, 1274, 1157, 1093, 849, 749; HRMS (ESI -TOF) *m/z*: [M+H]<sup>+</sup> Calcd for C<sub>21</sub>H<sub>20</sub>N<sub>3</sub>O<sub>3</sub> 362.1505; Found 362.1505;

***cyclopropyl(1-nitro-3-phenyl-2,4-dihydro-5H-pyrrolo[3,4-c]quinolin-5-yl)methanone (3cc)***

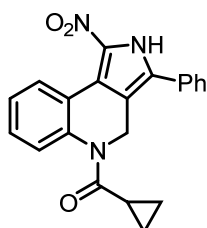

Isolation by column chromatography (PE/EA= 10/1 v/v) Yellow solid; 48.8 mg, 68% yield; mp: 240-241 °C; <sup>1</sup>H NMR (400 MHz, CDCl<sub>3</sub>) (δ, ppm): 9.67 (s, 1H), 8.60 (d, *J* = 6.8 Hz, 1H), 7.55 (d, *J* = 7.6 Hz, 1H), 7.51 (d, *J* = 4.4 Hz, 4H), 7.48–7.37 (m, 3H), 1.97–1.90 (m, 1H), 1.11 (s, 2H), 0.80 (s, 2H). <sup>13</sup>C NMR (100 MHz, CDCl<sub>3</sub>) (δ, ppm): 173.2, 138.4, 132.7, 131.4, 129.9, 129.7, 129.2, 128.9, 128.8, 127.3, 126.3, 125.5, 124.1, 120.6, 120.6, 39.1, 13.3, 9.8. IR (KBr, ν, cm<sup>-1</sup>): 3447, 1636, 1570, 1478, 1366, 1265, 1160, 748; HRMS (ESI -TOF) *m/z*: [M+H]<sup>+</sup> Calcd for C<sub>21</sub>H<sub>18</sub>N<sub>3</sub>O<sub>3</sub> 360.1348; Found 360.1343;

***cyclohexyl(1-nitro-3-phenyl-2,4-dihydro-5H-pyrrolo[3,4-c]quinolin-5-yl)methanone (3dd)***

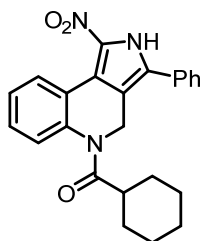

Isolation by column chromatography (PE/EA= 10/1 v/v) Yellow solid; 59.4 mg, 74% yield; mp: 236-237 °C; <sup>1</sup>H NMR (400 MHz, CDCl<sub>3</sub>) (δ, ppm): 9.77 (s, 1H), 8.66–8.61 (m, 1H), 7.58 (d, *J* = 6.4 Hz, 4H), 7.52 (d, *J* = 6.8 Hz, 1H), 7.49–7.44 (m, 2H), 7.39–7.34 (m, 1H), 2.91–2.82 (m, 1H), 1.89–1.60 (m, 6H), 1.36–1.04 (m, 4H). <sup>13</sup>C NMR (100 MHz, CDCl<sub>3</sub>) (δ, ppm): 176.2, 138.3, 132.7, 131.4, 129.8, 129.6, 129.2, 128.9, 128.6, 127.3, 126.6, 125.4, 125.0, 124.4, 121.0, 120.5, 40.8, 38.9, 29.8, 25.7, 25.5. IR (KBr, ν, cm<sup>-1</sup>): 3445, 1625, 1569, 1480, 1368, 1275, 1157, 1025, 853, 750; HRMS (ESI -TOF) *m/z*: [M+H]<sup>+</sup> Calcd for C<sub>24</sub>H<sub>24</sub>N<sub>3</sub>O<sub>3</sub> 402.1818; Found 402.1822;

***(1-nitro-3-phenyl-2,4-dihydro-5H-pyrrolo[3,4-c]quinolin-5-yl)(p-tolyl)methanone (3ee)***

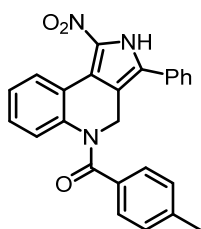

Isolation by column chromatography (PE/EA= 10/1 v/v) Yellow solid; 65.5 mg, 80% yield; mp: 136-137 °C; <sup>1</sup>H NMR (400 MHz, CDCl<sub>3</sub>) (δ, ppm): 9.78 (s, 1H), 8.58 (d, *J* = 7.6 Hz, 1H), 7.53 (d, *J* = 4.4 Hz, 4H), 7.50–7.46 (m, 1H), 7.24 (d, *J* = 7.2 Hz, 3H), 7.03 (d, *J* = 7.6 Hz, 3H), 6.70 (d, *J* = 8.0 Hz, 1H), 2.31 (s, 3H). <sup>13</sup>C NMR (100 MHz, CDCl<sub>3</sub>) (δ, ppm): 169.5, 141.3, 139.2, 131.8, 131.5, 129.9, 129.7, 129.6, 128.9, 128.4, 127.3, 126.3, 125.6, 122.7, 120.4, 120.0, 40.2, 21.6. IR (KBr, ν, cm<sup>-1</sup>): 3448, 1629, 1570, 1479, 1365, 1247, 1145, 1026, 830, 747; HRMS (ESI -TOF) *m/z*: [M+Na]<sup>+</sup> Calcd for C<sub>25</sub>H<sub>19</sub>N<sub>3</sub>O<sub>3</sub>Na [M+Na]<sup>+</sup> 432.1324; Found 432.1318;

**(1*R*,2*S*,5*R*)-2-isopropyl-5-methylcyclohexyl 4-(1-nitro-5-tosyl-4,5-dihydro-2*H*-pyrrolo[3,4-*c*]quinolin-3-yl)benzoate (3ff)**

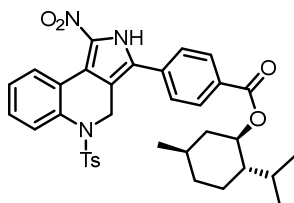

Isolation by column chromatography (PE/EA= 10/1 v/v) Yellow solid; 77.8 mg, 62% yield; mp: 232-233 °C; <sup>1</sup>H NMR (400 MHz, CDCl<sub>3</sub>) (δ, ppm): 9.44 (s, 1H), 8.29–8.22 (m, 3H), 7.81 (d, *J* = 7.6 Hz, 1H), 7.54–7.43 (m, 4H), 6.88–6.77 (m, 4H), 5.03–4.96 (m, 1H), 4.85 (d, *J* = 4.0 Hz, 2H), 2.24 (s, 3H), 2.16 (d, *J* = 12.4 Hz, 1H), 2.05–1.97 (m, 1H), 1.80–1.73 (m, 2H), 1.65–1.54 (m, 2H), 1.21–1.11 (m, 2H), 1.01–0.92 (m, 7H), 0.84 (d, *J* = 7.2 Hz, 3H). <sup>13</sup>C NMR (100 MHz, CDCl<sub>3</sub>) (δ, ppm): 165.2, 143.8, 136.5, 133.9, 132.6, 132.4, 132.1, 131.1, 130.1, 130.1, 129.2, 128.6, 128.4, 128.0, 127.0, 126.9, 125.3, 119.5, 118.0, 75.7, 47.4, 43.4, 41.1, 34.4, 31.6, 26.7, 23.7, 22.2, 21.3, 20.9, 16.7. IR (KBr, ν, cm<sup>-1</sup>): 3418, 3271, 2955, 2869, 1712, 1612, 1476, 1407, 1353, 1274, 1165, 1108, 957, 858, 765, 578; HRMS (ESI -TOF) *m/z*: [M+H]<sup>+</sup> Calcd for C<sub>35</sub>H<sub>38</sub>N<sub>3</sub>O<sub>6</sub>S 628.2481; Found 628.2477;

**General Procedure for the Synthesis of Product 5.**

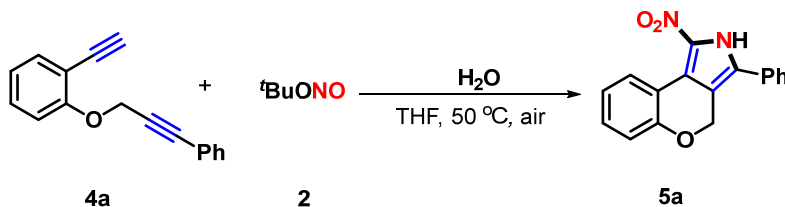

To a pressure tube were added 1,7-diyne **4a** (0.2 mmol, 46.4 mg), *tert*-butyl nitrite (**2**, 0.7 mmol, 72.1 mg, 3.5 equiv), and THF (3 mL, about 0.46 mmol H<sub>2</sub>O in 3 mL). Then the mixture was stirred in oil bath at 50 °C for 8 h until complete consumption of starting material as monitored by TLC. After the reaction was finished, the reaction mixture was cooled to room temperature, diluted in ethyl acetate, and washed with H<sub>2</sub>O. The aqueous phase was re-extracted with ethyl acetate. The combined organic extracts were dried over Na<sub>2</sub>SO<sub>4</sub> and concentrated in vacuum, and the resulting residue was purified by silica gel column chromatography (eluent, petroleum ether/ethyl acetate = 15:1) to afford the desired product **5a** as yellow solid in 64% yield.

**1-nitro-3-phenyl-2,4-dihydrochromeno[3,4-*c*]pyrrole (5a)**

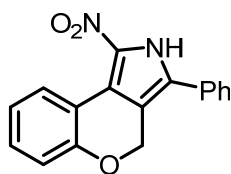

Isolation by column chromatography (PE/EA= 15/1 v/v) Yellow solid; 37.3 mg, 64% yield; mp: 209-210 °C; <sup>1</sup>H NMR (400 MHz, CDCl<sub>3</sub>) (δ, ppm): 9.57 (s, 1H), 8.61 (d, *J* = 7.2 Hz, 1H), 7.57–7.46 (m, 3H), 7.42 (d, *J* = 7.2 Hz, 2H), 7.31 (d, *J* = 8.0 Hz, 1H), 7.15–7.10 (m, 1H), 7.05 (d, *J* = 8.0 Hz, 1H), 5.21 (s, 2H). <sup>13</sup>C NMR (100 MHz, CDCl<sub>3</sub>) (δ, ppm): 155.0,

131.0, 130.7, 129.8, 129.6, 128.9, 128.5, 127.1, 122.4, 118.9, 117.8, 117.5, 116.9, 62.5. IR (KBr,  $\nu$ ,  $\text{cm}^{-1}$ ): 3445, 1634, 1532, 1456, 1304, 1237, 1108, 851, 747; HRMS (ESI -TOF)  $m/z$ :  $[M+H]^+$  Calcd for  $\text{C}_{17}\text{H}_{13}\text{N}_2\text{O}_3$  293.0926; Found 293.0924;

**1-nitro-3-(*p*-tolyl)-2,4-dihydrochromeno[3,4-*c*]pyrrole (5b)**

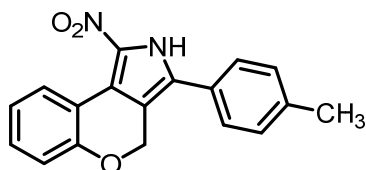

Isolation by column chromatography (PE/EA= 15/1 v/v) Yellow solid; 30.6 mg, 50% yield; mp: 229-230 °C;  $^1\text{H}$  NMR (400 MHz,  $\text{DMSO-}d_6$ ) ( $\delta$ , ppm): 13.26 (s, 1H), 8.46 (d,  $J$  = 8.0 Hz, 1H), 7.50 (d,  $J$  = 8.0 Hz, 2H), 7.35 (d,  $J$  = 8.0 Hz, 3H), 7.15–7.10 (m, 1H), 7.06 (d,  $J$  = 8.0 Hz, 1H), 5.18 (s, 2H), 2.39 (s, 3H).  $^{13}\text{C}$  NMR (100 MHz,  $\text{DMSO-}d_6$ ) ( $\delta$ , ppm): 155.2, 139.5, 133.2, 132.8, 131.0, 130.0, 128.7, 128.2, 126.4, 122.5, 118.6, 118.0, 117.9, 117.0, 63.0, 21.5. IR (KBr,  $\nu$ ,  $\text{cm}^{-1}$ ): 3445, 1634, 1480, 1397, 1322, 1274, 1109, 810, 743; HRMS (ESI -TOF)  $m/z$ :  $[M+Na]^+$  Calcd for  $\text{C}_{18}\text{H}_{14}\text{N}_2\text{O}_3\text{Na}$  329.0902; Found 329.0897;

**3-(3,4-dimethylphenyl)-1-nitro-2,4-dihydrochromeno[3,4-*c*]pyrrole (5c)**

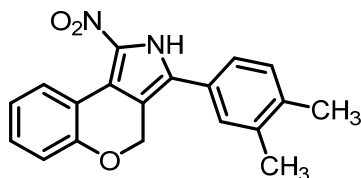

Isolation by column chromatography (PE/EA= 15/1 v/v) Yellow solid; 41.6 mg, 65% yield; mp: 230-231 °C;  $^1\text{H}$  NMR (400 MHz,  $\text{CDCl}_3$ ) ( $\delta$ , ppm): 9.53 (s, 1H), 8.61 (d,  $J$  = 8.0 Hz, 1H), 7.35–7.27 (m, 2H), 7.19 (s, 1H), 7.15–7.10 (m, 2H), 7.04 (d,  $J$  = 8.4 Hz, 1H), 5.20 (s, 2H), 2.34 (d,  $J$  = 5.2 Hz, 6H).  $^{13}\text{C}$  NMR (100 MHz,  $\text{CDCl}_3$ ) ( $\delta$ , ppm): 155.0, 138.9, 138.2, 131.2, 131.0, 130.8, 128.5, 128.0, 126.4, 124.6, 122.4, 119.1, 117.9, 117.5, 116.5, 62.6, 20.0, 19.8. IR (KBr,  $\nu$ ,  $\text{cm}^{-1}$ ): 3445, 1634, 1557, 1441, 1371, 1265, 1109, 1045, 812, 743; HRMS (ESI -TOF)  $m/z$ :  $[M+H]^+$  Calcd for  $\text{C}_{19}\text{H}_{17}\text{N}_2\text{O}_3$  321.1239; Found 321.1235;

**3-(4-methoxyphenyl)-1-nitro-2,4-dihydrochromeno[3,4-*c*]pyrrole (5d)**

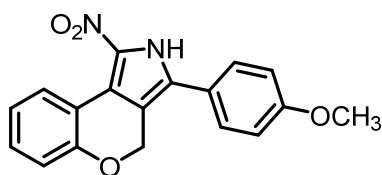

Isolation by column chromatography (PE/EA= 15/1 v/v) Yellow solid; 36.7 mg, 57% yield; mp: 220-221 °C;  $^1\text{H}$  NMR (400 MHz,  $\text{CDCl}_3$ ) ( $\delta$ , ppm): 9.51 (s, 1H), 8.62 (d,  $J$  = 8.0 Hz, 1H), 7.38 – 7.29 (m, 3H), 7.16 – 7.10 (m, 1H), 7.05 (d,  $J$  = 8.8 Hz, 3H), 5.19 (s, 2H), 3.89 (s, 3H).  $^{13}\text{C}$  NMR (100 MHz,  $\text{CDCl}_3$ ) ( $\delta$ , ppm): 160.9, 155.1, 131.0, 128.6, 122.4, 121.3, 119.2, 117.9, 117.5, 116.2, 115.1, 62.6, 55.6. IR (KBr,  $\nu$ ,  $\text{cm}^{-1}$ ): 3445, 1651, 1538, 1447, 1373, 1255, 1183, 835, 740; HRMS (ESI -TOF)  $m/z$ :  $[M+H]^+$  Calcd for  $\text{C}_{18}\text{H}_{15}\text{N}_2\text{O}_4$  323.1032; Found 323.1035;

**3-(4-chlorophenyl)-1-nitro-2,4-dihydrochromeno[3,4-*c*]pyrrole (5e)**

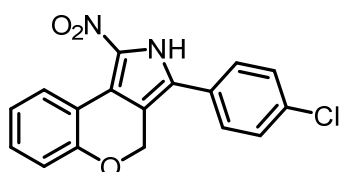

Isolation by column chromatography (PE/EA= 15/1 v/v) Yellow solid; 40.4 mg, 62% yield; mp: 232-233 °C; <sup>1</sup>H NMR (400 MHz, DMSO-*d*<sub>6</sub>) (δ, ppm): 13.40 (s, 1H), 8.44 (d, *J* = 8.0 Hz, 1H), 7.65–7.58 (m, 4H), 7.36–7.31 (m, 1H), 7.15–7.10 (m, 1H), 7.06 (d, *J* = 8.0 Hz, 1H), 5.19 (s, 2H). <sup>13</sup>C NMR (100 MHz, DMSO-*d*<sub>6</sub>) (δ, ppm): 155.2, 134.5, 133.6, 131.2, 131.1, 130.5, 129.5, 128.2, 128.1, 122.5, 118.5, 117.9, 117.8, 117.6, 62.8. IR (KBr, ν, cm<sup>-1</sup>): 3445, 1634, 1473, 1319, 1275, 1099, 746; HRMS (ESI -TOF) *m/z*: [M+H]<sup>+</sup> Calcd for C<sub>17</sub>H<sub>12</sub>ClN<sub>2</sub>O<sub>3</sub> 327.0356; Found 327.0354;

**8-methyl-1-nitro-3-phenyl-2,4-dihydrochromeno[3,4-c]pyrrole (5f)**

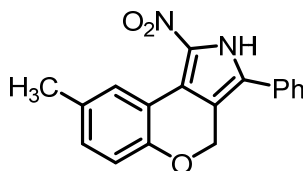

Isolation by column chromatography (PE/EA= 15/1 v/v) Yellow solid; 36.7 mg, 60% yield; mp: 232-233 °C; <sup>1</sup>H NMR (400 MHz, CDCl<sub>3</sub>) (δ, ppm): 9.58 (s, 1H), 8.40 (s, 1H), 7.57–7.45 (m, 3H), 7.41 (d, *J* = 7.6 Hz, 2H), 7.12 (d, *J* = 8.0 Hz, 1H), 6.94 (d, *J* = 8.4 Hz, 1H), 5.16 (s, 2H), 2.39 (s, 3H). <sup>13</sup>C NMR (100 MHz, CDCl<sub>3</sub>) (δ, ppm): 152.9, 132.7, 131.7, 130.8, 129.8, 129.7, 129.0, 128.7, 127.1, 119.2, 117.5, 117.2, 117.1, 62.6, 21.1. IR (KBr, ν, cm<sup>-1</sup>): 3445, 1634, 1465, 1377, 1275, 1152, 1018, 815, 749; HRMS (ESI -TOF) *m/z*: [M+H]<sup>+</sup> Calcd for C<sub>18</sub>H<sub>15</sub>N<sub>2</sub>O<sub>3</sub> 307.1083; Found 307.1079;

**8-chloro-1-nitro-3-phenyl-2,4-dihydrochromeno[3,4-c]pyrrole (5f)**

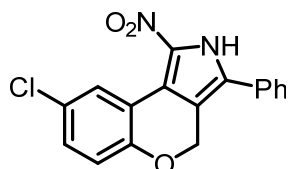

Isolation by column chromatography (PE/EA= 15/1 v/v) Yellow solid; 43.0 mg, 66% yield; mp: 229-230 °C; <sup>1</sup>H NMR (400 MHz, CDCl<sub>3</sub>) (δ, ppm): 9.63 (s, 1H), 8.62 (s, 1H), 7.66–7.44 (m, 4H), 7.41 (d, *J* = 7.6 Hz, 2H), 6.98 (d, *J* = 8.8 Hz, 1H), 5.21 (s, 2H). <sup>13</sup>C NMR (100 MHz, DMSO-*d*<sub>6</sub>) (δ, ppm): 153.8, 133.4, 132.4, 130.4, 129.8, 129.4, 128.9, 128.7, 127.4, 126.0, 120.0, 119.6, 117.0, 116.4, 63.1. IR (KBr, ν, cm<sup>-1</sup>): 3459, 1634, 1456, 1376, 1274, 1116, 888, 748; HRMS (ESI -TOF) *m/z*: [M+H]<sup>+</sup> Calcd for C<sub>17</sub>H<sub>12</sub>ClN<sub>2</sub>O<sub>3</sub> 327.0356; Found 327.0357;

**General Procedure for the Synthesis of Product 7**

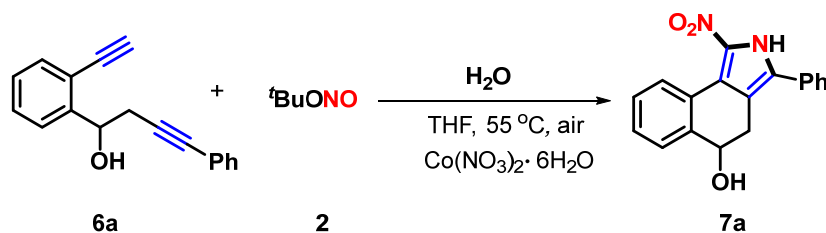

To a pressure tube were added 1,7-diyne **6a** (0.2 mmol, 49.2 mg), *tert*-butyl nitrite (**2**, 0.7 mmol, 72.1 mg, 3.5 equiv), Co(NO<sub>3</sub>)<sub>2</sub>·6H<sub>2</sub>O (0.2 mmol, 58.2 mg, 1.0 equiv) and THF (3 mL, about 0.46 mmol H<sub>2</sub>O in 3 mL). Then the mixture was stirred in oil bath at 55 °C for 8 h until complete consumption of starting material as monitored by TLC. After the reaction was finished, the reaction mixture was cooled to room temperature, diluted in ethyl acetate, and washed with H<sub>2</sub>O. The aqueous phase was re-extracted with ethyl acetate. The combined organic extracts were dried over Na<sub>2</sub>SO<sub>4</sub> and concentrated in vacuum, and the resulting residue was purified by silica gel column chromatography (eluent, petroleum ether/ethyl acetate = 10:1) to afford the desired product **7a** as yellow solid in 60% yield.

**1-nitro-3-phenyl-4,5-dihydro-2H-benzof[*e*]isindol-5-ol (7a)**

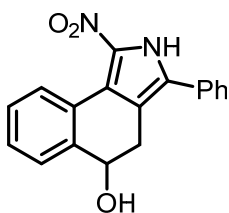

Isolation by column chromatography (PE/EA= 10/1 v/v) Yellow solid; 36.7 mg, 60% yield; mp: 184-185 °C; <sup>1</sup>H NMR (400 MHz, DMSO-*d*<sub>6</sub>) (δ, ppm): 13.07 (s, 1H), 8.36–8.30 (m, 1H), 7.69 (d, *J* = 8.0 Hz, 2H), 7.60–7.52 (m, 3H), 7.50–7.46 (m, 1H), 7.42–7.37 (m, 2H), 5.45 (d, *J* = 4.4 Hz, 1H), 4.73–4.66 (m, 1H), 2.97–2.90 (m, 1H), 2.78–2.71 (m, 1H). <sup>13</sup>C NMR (100 MHz, DMSO-*d*<sub>6</sub>) (δ, ppm): 141.5, 134.5, 133.6, 129.9, 129.3, 129.1, 128.9, 127.7, 127.7, 127.5, 126.4, 122.2, 119.4, 67.9, 30.3. IR (KBr, ν, cm<sup>-1</sup>): 3418, 3266, 1473, 1398, 1245, 1161, 1052, 845, 775; HRMS (ESI -TOF) *m/z*: [M+H]<sup>+</sup> Calcd for C<sub>18</sub>H<sub>15</sub>N<sub>2</sub>O<sub>3</sub> 307.1083; Found 307.1081;

**1-nitro-3-(*p*-tolyl)-4,5-dihydro-2H-benzo[e]isoindol-5-ol (7b)**

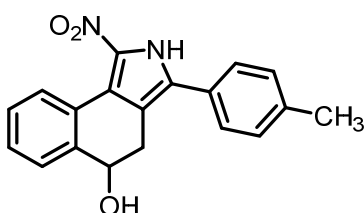

Isolation by column chromatography (PE/EA= 10/1 v/v) Yellow solid; 39.7 mg, 62% yield; mp: 215-216 °C; <sup>1</sup>H NMR (400 MHz, DMSO-*d*<sub>6</sub>) (δ, ppm): 13.00 (s, 1H), 8.36–8.31 (m, 1H), 7.58 (d, *J* = 8.0 Hz, 3H), 7.42–7.37 (m, 2H), 7.35 (d, *J* = 8.0 Hz, 2H), 5.44 (d, *J* = 4.8 Hz, 1H), 4.71–4.66 (m, 1H), 2.96–2.89 (m, 1H), 2.77–2.69 (m, 1H), 2.39 (s, 3H). <sup>13</sup>C NMR (100 MHz, DMSO-*d*<sub>6</sub>) (δ, ppm): 141.6, 139.1, 134.9, 133.5, 129.8, 129.0, 128.9, 127.8, 127.8, 127.5, 127.1, 126.5, 122.5, 119.3, 68.0, 30.4, 21.5. IR (KBr, ν, cm<sup>-1</sup>): 3445, 1634, 1538, 1447, 1359, 1255, 1183, 835, 740; HRMS (ESI -TOF) *m/z*: [M+H]<sup>+</sup> Calcd for C<sub>19</sub>H<sub>17</sub>N<sub>2</sub>O<sub>3</sub> 321.1239; Found 321.1239;

**1-nitro-3-(*m*-tolyl)-4,5-dihydro-2H-benzo[e]isoindol-5-ol (7c)**

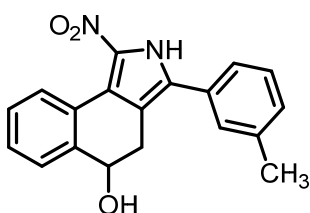

Isolation by column chromatography (PE/EA= 10/1 v/v) Yellow solid; 38.4 mg, 60% yield; mp: 202-203 °C; <sup>1</sup>H NMR (400 MHz, DMSO-*d*<sub>6</sub>) (δ, ppm): 13.00 (s, 1H), 8.38–8.29 (m, 1H), 7.61–7.56 (m, 1H), 7.53 (s, 1H), 7.49–7.42 (m, 2H), 7.41–7.37 (m, 2H), 7.29 (d, *J* = 7.2 Hz, 1H), 5.44 (s, 1H), 4.73–4.65 (m, 1H), 2.98–2.90 (m, 1H), 2.79–2.70 (m, 1H), 2.41 (s, 3H). <sup>13</sup>C NMR (100 MHz, DMSO-*d*<sub>6</sub>) (δ, ppm): 141.5, 138.4, 134.7, 133.5, 130.0, 129.8, 129.4, 129.0, 128.9, 127.7, 127.7, 127.5, 126.4, 126.0, 122.2, 119.4, 67.9, 30.3, 21.5. IR (KBr, ν, cm<sup>-1</sup>): 3445, 1634, 1538, 1445, 1360, 1275, 1183, 835, 749; HRMS (ESI -TOF) *m/z*: [M+Na]<sup>+</sup> Calcd for C<sub>19</sub>H<sub>16</sub>N<sub>2</sub>O<sub>3</sub>Na 343.1059; Found 343.1056;

**3-(4-chlorophenyl)-1-nitro-4,5-dihydro-2H-benzo[e]isoindol-5-ol (7d)**

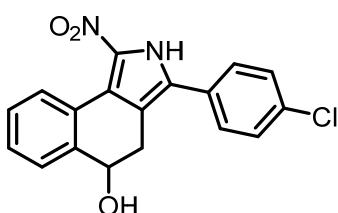

Isolation by column chromatography (PE/EA= 10/1 v/v) Yellow solid; 40.8 mg, 60% yield; mp: 203-204 °C; <sup>1</sup>H NMR (400 MHz, DMSO-*d*<sub>6</sub>) (δ, ppm): 13.13 (s, 1H), 8.36–8.28 (m, 1H), 7.71 (d, *J* = 8.0 Hz, 2H), 7.64–7.55 (m, 3H), 7.43–7.36 (m, 2H), 5.45 (d, *J* = 4.8 Hz, 1H), 4.74–4.65 (m, 1H), 2.97–2.87 (m, 1H), 2.79–2.69 (m, 1H). <sup>13</sup>C NMR (100 MHz, DMSO-*d*<sub>6</sub>) (δ, ppm): 141.5, 134.0, 133.7, 133.1, 130.6, 129.2, 128.9, 128.7, 127.7, 127.6, 127.5, 126.4, 122.1, 119.7, 67.9, 30.2. IR (KBr, ν, cm<sup>-1</sup>): 3445, 1634, 1474, 1361, 1275, 1092, 832, 749; HRMS (ESI -TOF) *m/z*: [M+H]<sup>+</sup> Calcd for C<sub>18</sub>H<sub>13</sub>ClN<sub>2</sub>O<sub>3</sub> 341.0693; Found 341.0692;

### 3-(3-chlorophenyl)-1-nitro-4,5-dihydro-2H-benzof[e]isoindol-5-ol (7e)

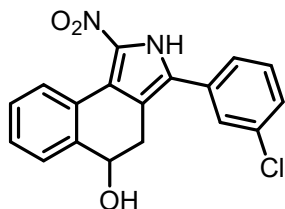

Isolation by column chromatography (PE/EA= 10/1 v/v) Yellow solid; 39.4 mg, 58% yield; mp: 193-194 °C; <sup>1</sup>H NMR (400 MHz, DMSO-*d*<sub>6</sub>) (δ, ppm): 13.17 (s, 1H), 8.34–8.28 (m, 1H), 7.80 (s, 1H), 7.64–7.53 (m, 4H), 7.43–7.37 (m, 2H), 5.46 (d, *J* = 4.4 Hz, 1H), 4.73–4.67 (m, 1H), 2.97–2.90 (m, 1H), 2.80–2.72 (m, 1H). <sup>13</sup>C NMR (100 MHz, DMSO-*d*<sub>6</sub>) (δ, ppm): 141.4, 133.9, 133.8, 132.6, 131.9, 131.0, 129.1, 129.0, 128.4, 127.6, 127.6, 127.5, 126.4, 122.0, 119.9, 67.8, 30.2. IR (KBr, ν, cm<sup>-1</sup>): 3440, 1634, 1458, 1390, 1275, 1202, 1025, 860, 749; HRMS (ESI -TOF) *m/z*: [M+H]<sup>+</sup> Calcd for C<sub>18</sub>H<sub>14</sub>ClN<sub>2</sub>O<sub>3</sub> 341.0693; Found 341.0694;

## General Procedure for Scale-Up Experiment of 3a

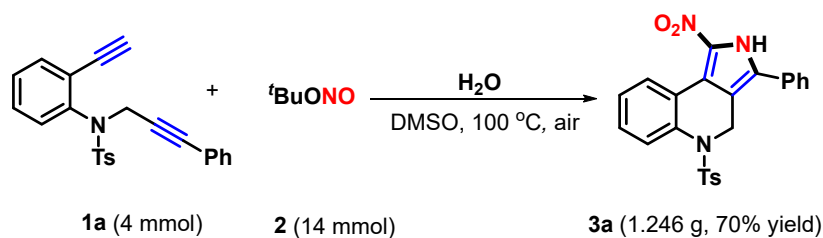

To an oven-dried 100-mL flask under Ar conditions, 1,7-diyne (**1a**, 4 mmol, 1.54 g, 1 equiv), *t*BuONO (**2**, 14 mmol, 1.24 g, 3.5 equiv), H<sub>2</sub>O (7.8 mmol, 0.14 g, 0.46 equiv) and DMSO (50 mL) were successively added. The resulting mixture was stirred in an oil bath at 100 °C for 5 h. After the reaction was complete (by TLC), the reaction mixture was cooled to room temperature and washed with H<sub>2</sub>O (80 mL) and extracted with ethyl acetate (3 × 50 mL). The combined organic layer was dried over Na<sub>2</sub>SO<sub>4</sub>, filtered, and concentrated under reduced pressure. The resulting residue was purified by column chromatography on silica gel (eluent, petroleum ether/ethyl acetate = 10:1 v/v) to afford the desired product **3a** as a yellow solid in 70% yield.

## General Procedure for the Synthesis of Product 8

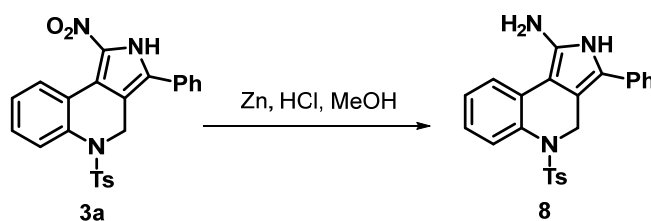

A suspension of **3a** (0.2 mmol, 89 mg, 1 equiv) in concentrated HCl (378 μL, 4.56 mmol) and methanol (2.0 mL) was placed in an ambient water bath. Zinc dust (261.6 mg, 4.0 mmol) was carefully added with vigorous stirring over 1 minute, and the mixture was stirred for 10 minutes. The reaction was then quenched with sat. NaHCO<sub>3</sub> (30 mL) and extracted with ethyl acetate (3 × 15 mL). The combined organic layers were washed with brine, dried over anhydrous

Na<sub>2</sub>SO<sub>4</sub> and concentrated. The residue was purified by column chromatography (eluent, petroleum ether/ethyl acetate = 5:1) on silica gel to afford **8** (77.2 mg, 93%).

**3-phenyl-5-tosyl-4,5-dihydro-2H-pyrrolo[3,4-c]quinolin-1-amine (8)**

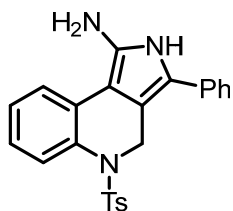

Blue solid; 77.2 mg, 93% yield; mp: 186-187 °C; <sup>1</sup>H NMR (400 MHz, DMSO-*d*<sub>6</sub>) (δ, ppm): 10.06 (s, 1H), 7.47–7.41 (m, 3H), 7.36 (d, *J* = 8.0 Hz, 1H), 7.27–7.20 (m, 3H), 7.19–7.14 (m, 1H), 7.06–7.02 (m, 1H), 6.91 (d, *J* = 8.0 Hz, 2H), 6.75 (d, *J* = 8.0 Hz, 2H), 4.79 (s, 2H), 4.62 (s, 2H), 2.26 (s, 3H). <sup>13</sup>C NMR (100 MHz, DMSO-*d*<sub>6</sub>) (δ, ppm): 143.2, 137.4, 134.8, 133.1, 132.3, 131.2, 129.3, 128.4, 128.2, 127.7, 126.7, 124.7, 124.5, 122.9, 122.8, 117.2, 112.2, 98.1, 44.7, 21.4. IR (KBr, ν, cm<sup>-1</sup>): 3428, 1624, 1508, 1338, 1265, 1157, 1030, 809, 757; HRMS (ESI -TOF) *m/z*: [M-H]<sup>-</sup> Calcd for C<sub>24</sub>H<sub>20</sub>N<sub>3</sub>O<sub>2</sub>S 414.1276; Found 414.1250;



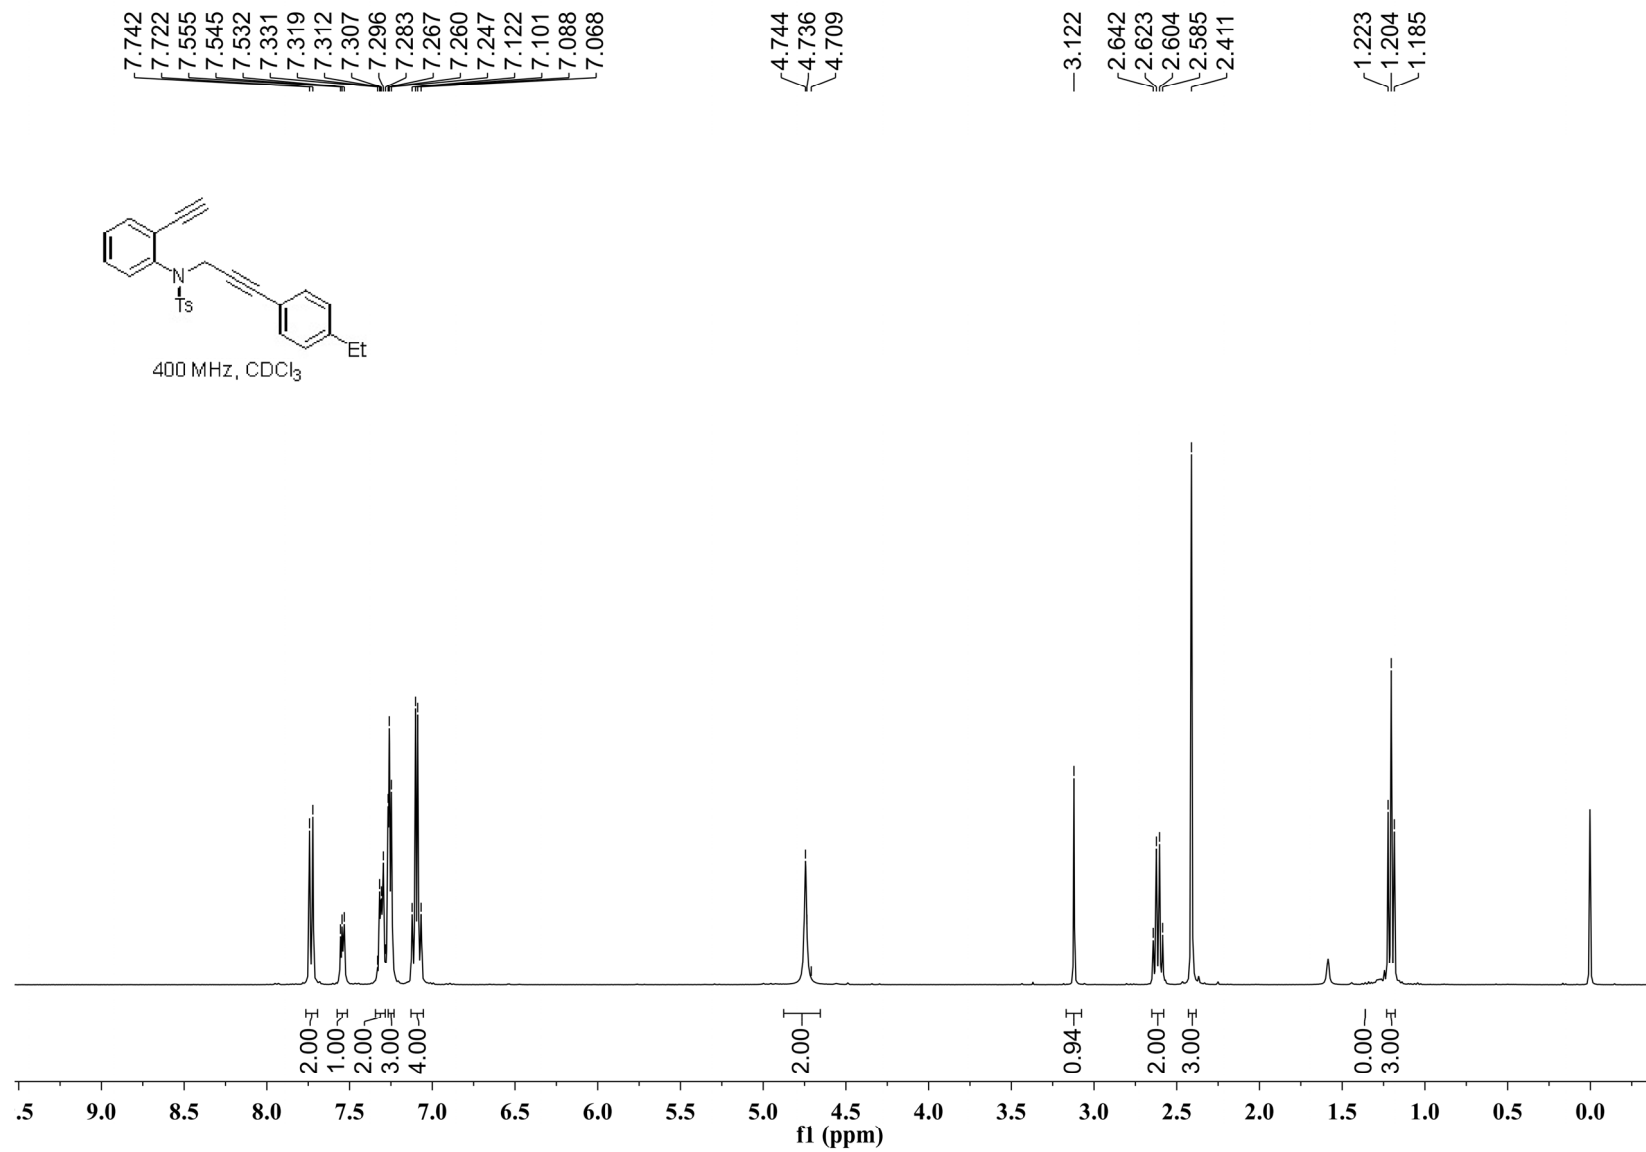

<sup>1</sup>H NMR Spectrum of Compound 1f

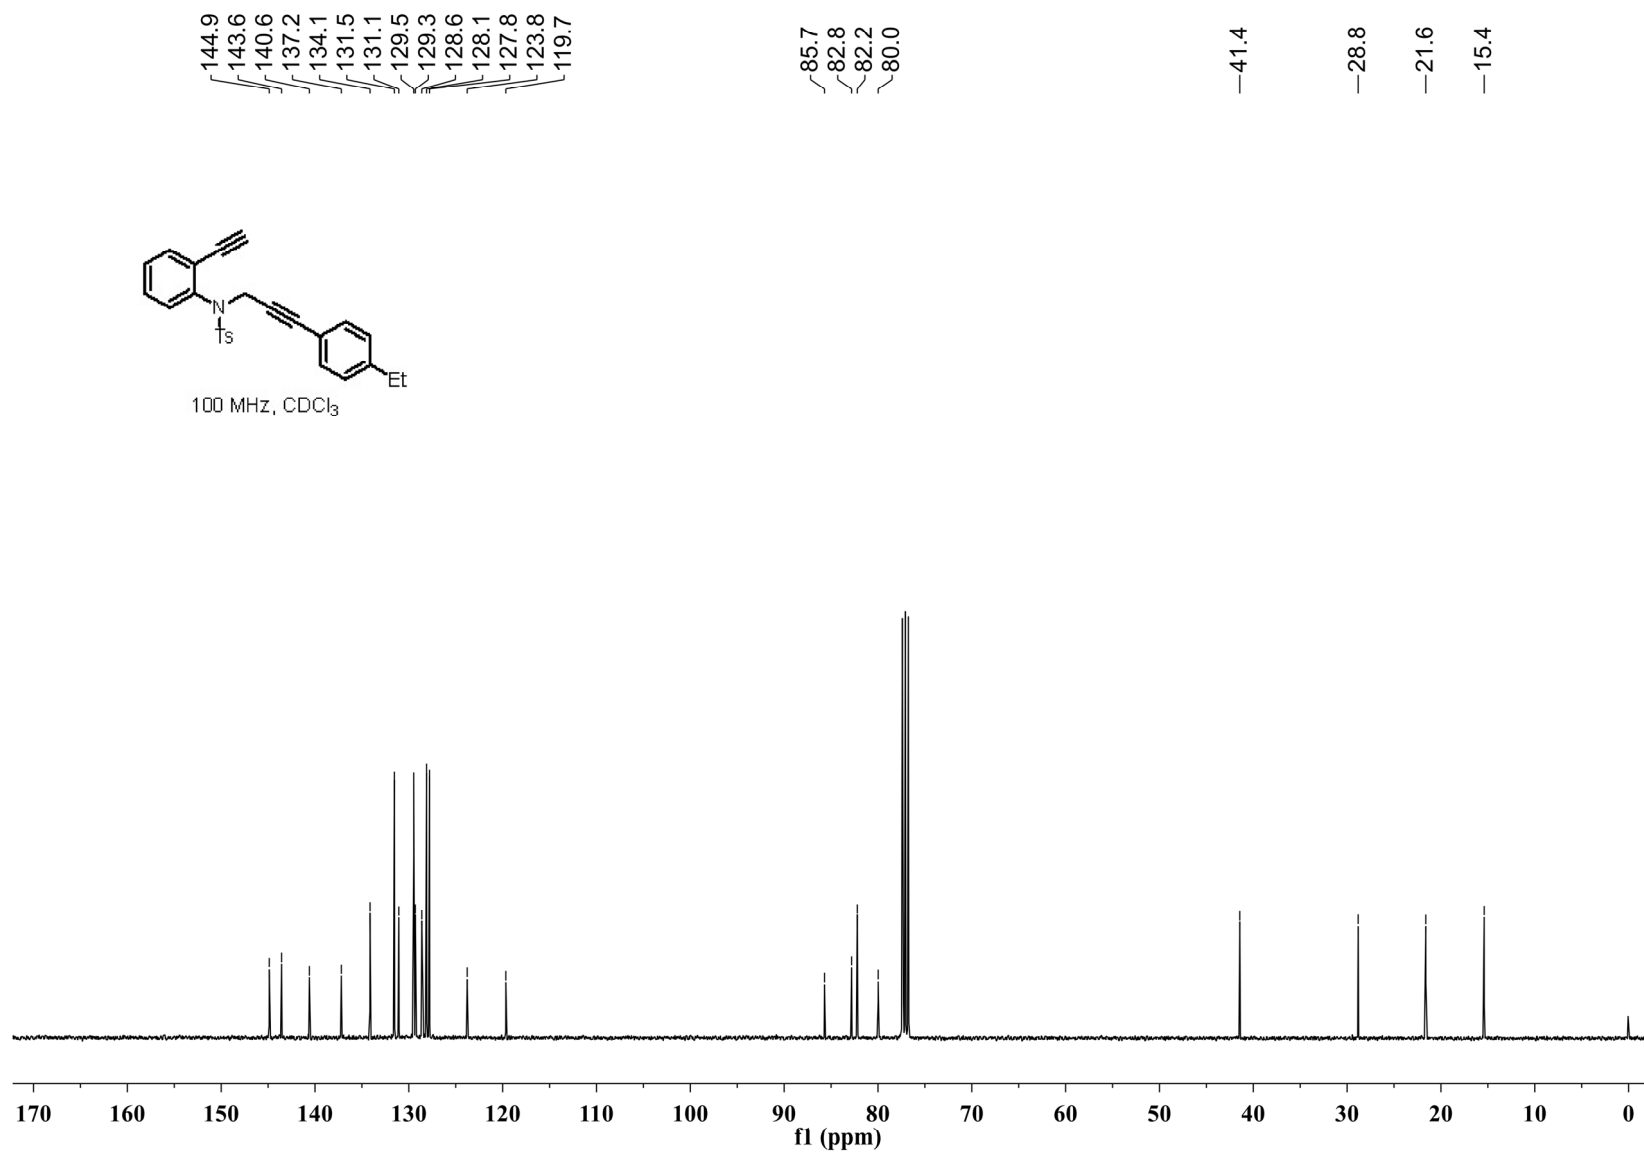

<sup>13</sup>C NMR Spectrum of Compound 1f

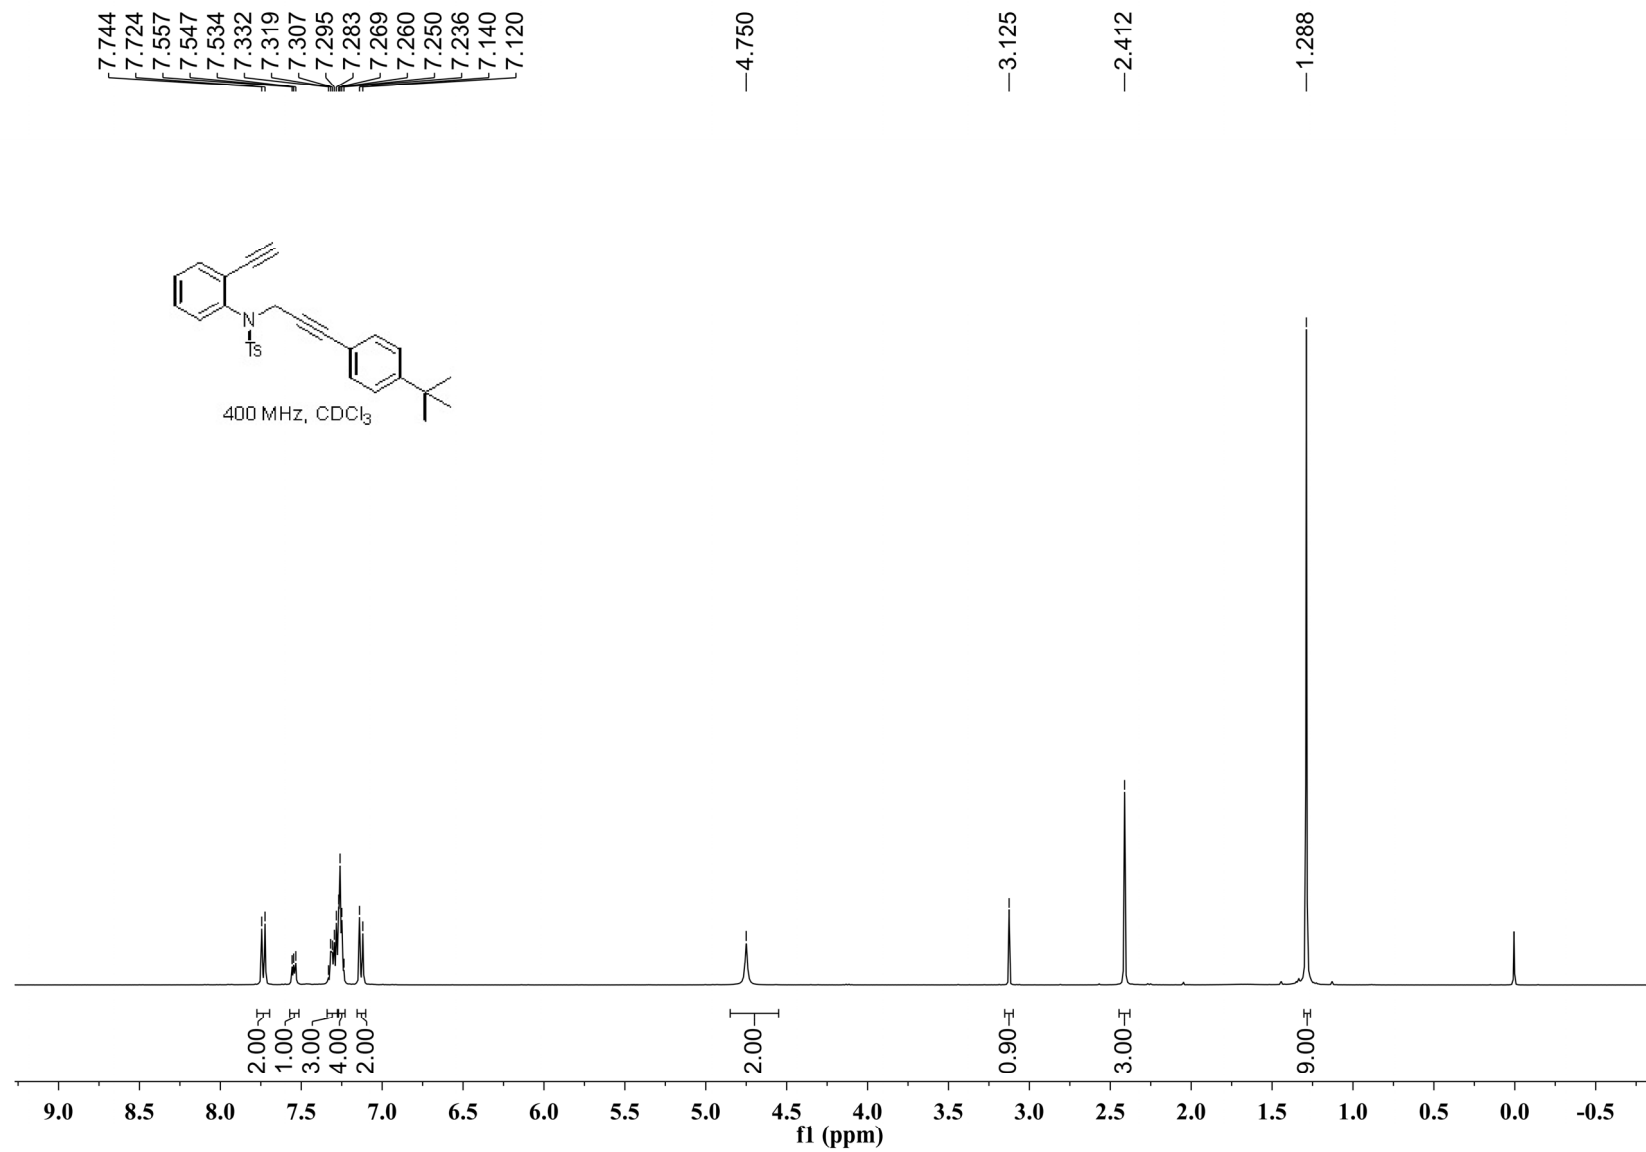

<sup>1</sup>H NMR Spectrum of Compound 1g

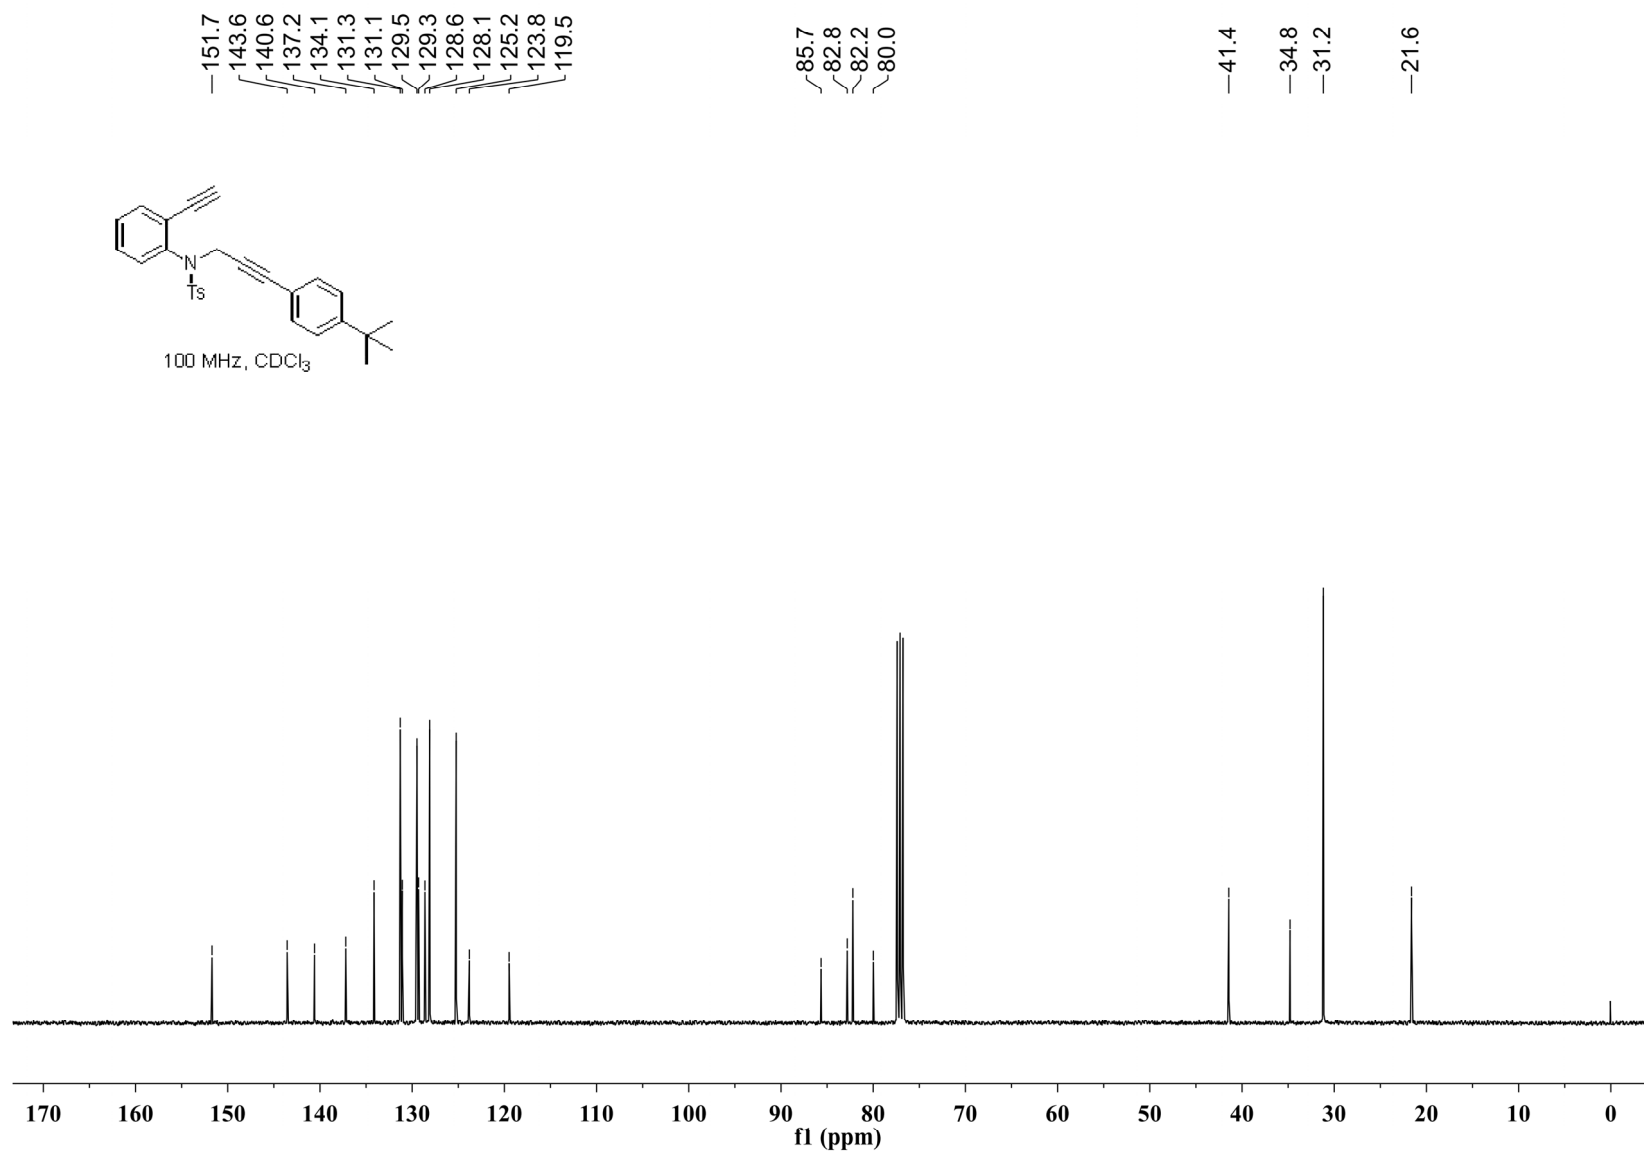

<sup>13</sup>C NMR Spectrum of Compound 1g

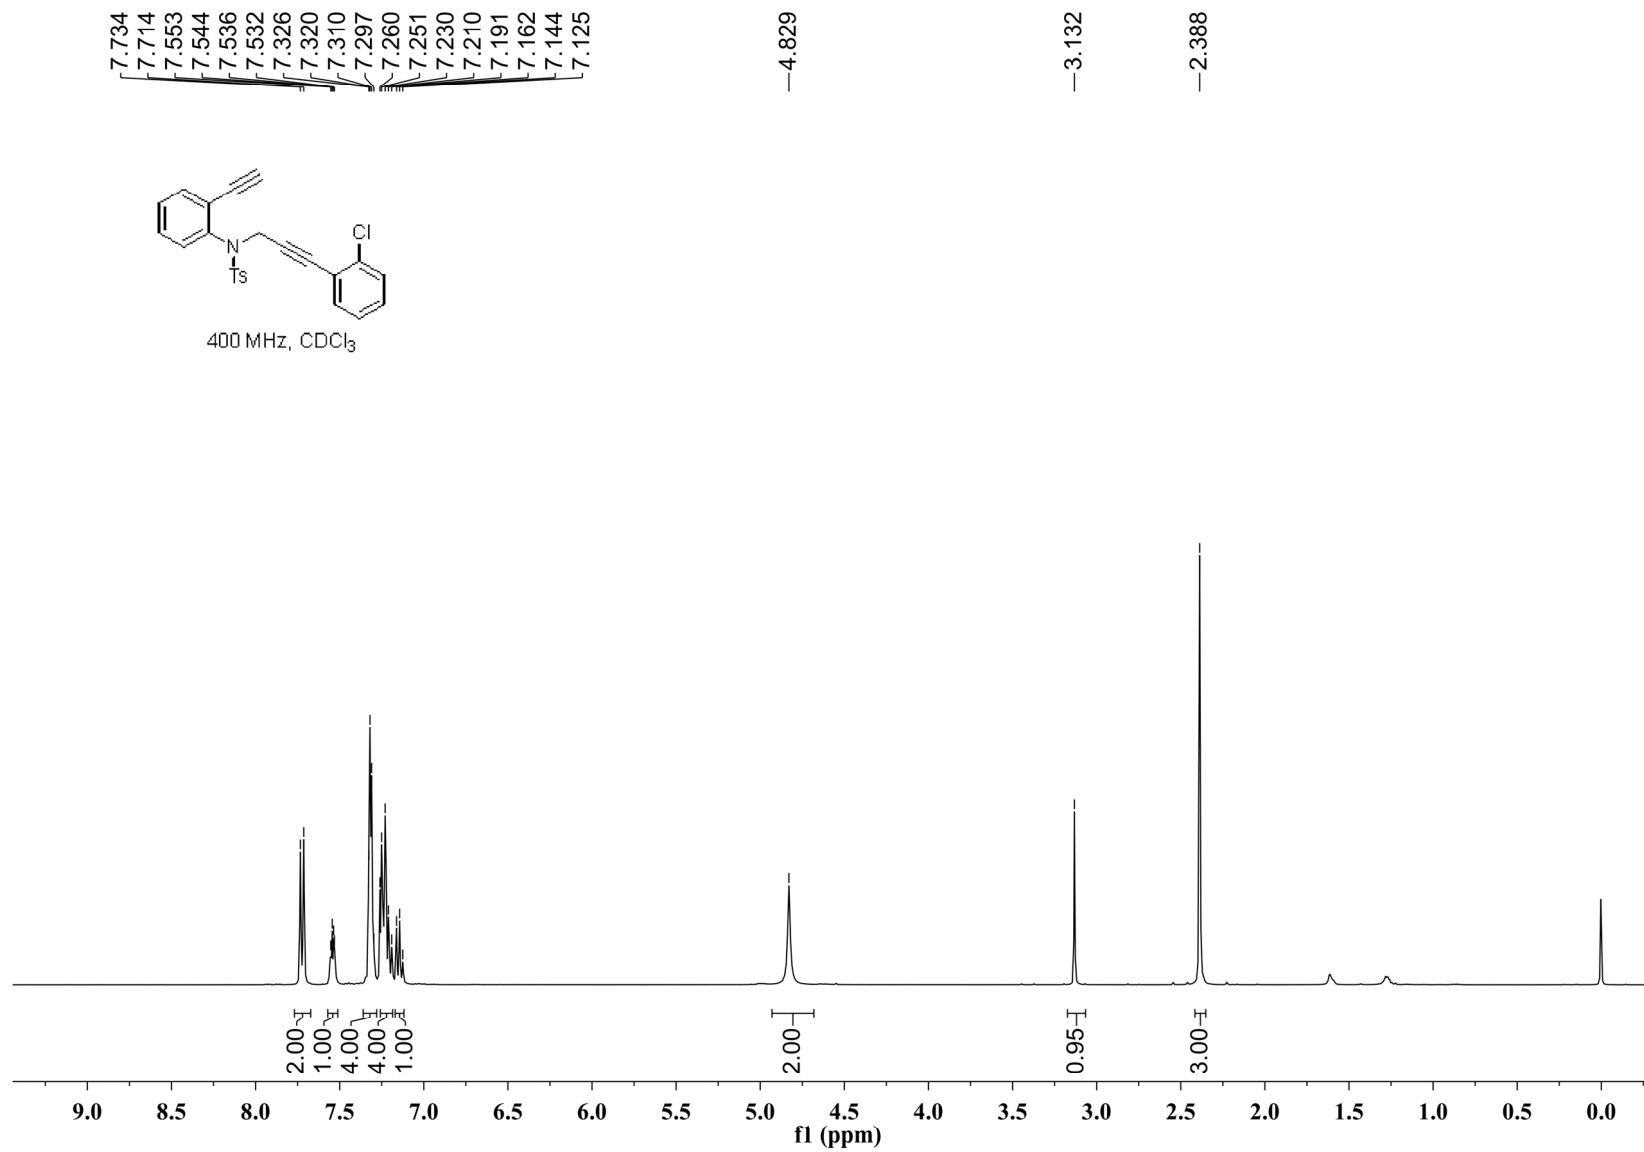

<sup>1</sup>H NMR Spectrum of Compound 1k

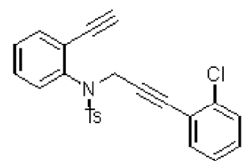

100 MHz, CDCl<sub>3</sub>

143.7  
140.4  
137.0  
135.8  
134.2  
133.5  
131.3  
129.5  
129.5  
129.4  
129.2  
128.7  
128.1  
126.4  
123.7  
122.4

-88.8  
82.3  
82.3  
80.0

-41.4

-21.6

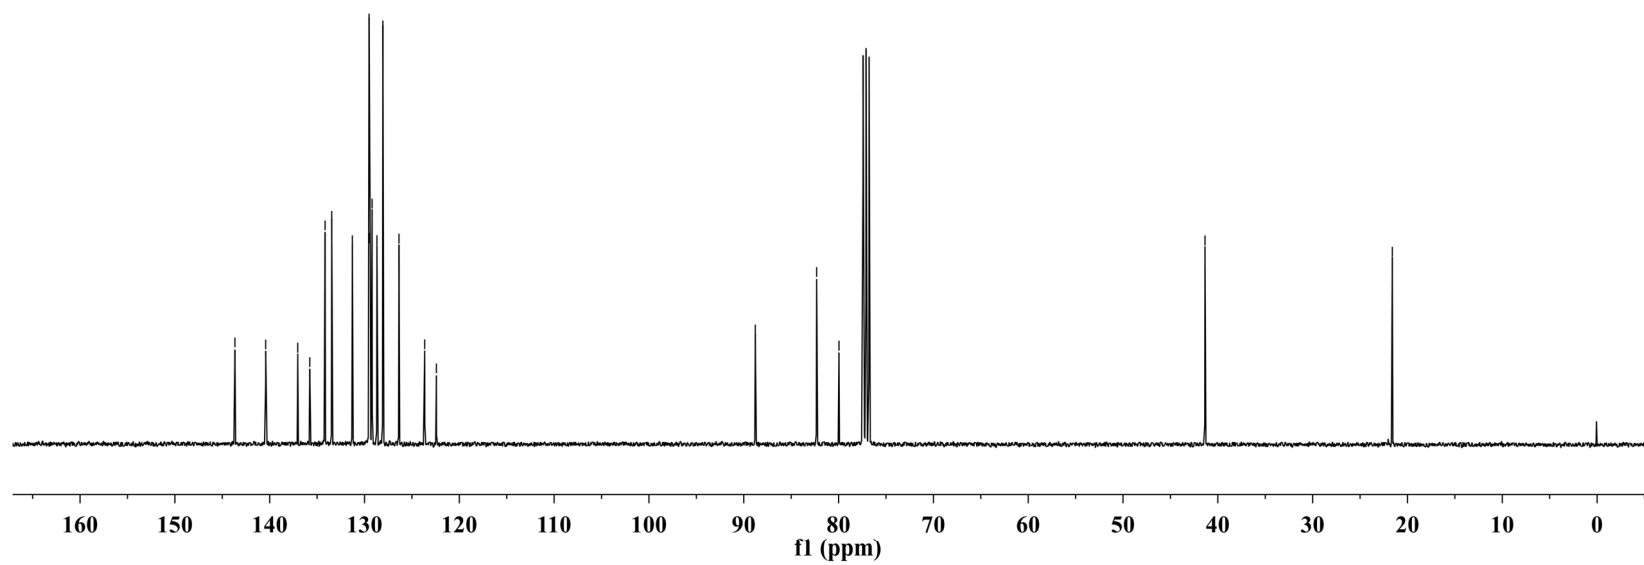

<sup>13</sup>C NMR Spectrum of Compound 1k

7.698  
7.679  
7.547  
7.527  
7.346  
7.337  
7.328  
7.311  
7.292  
7.269  
7.260  
7.246

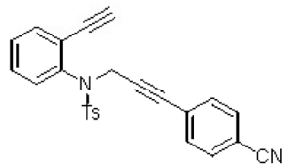

400 MHz, CDCl<sub>3</sub>

—4.760

—3.069

—2.412

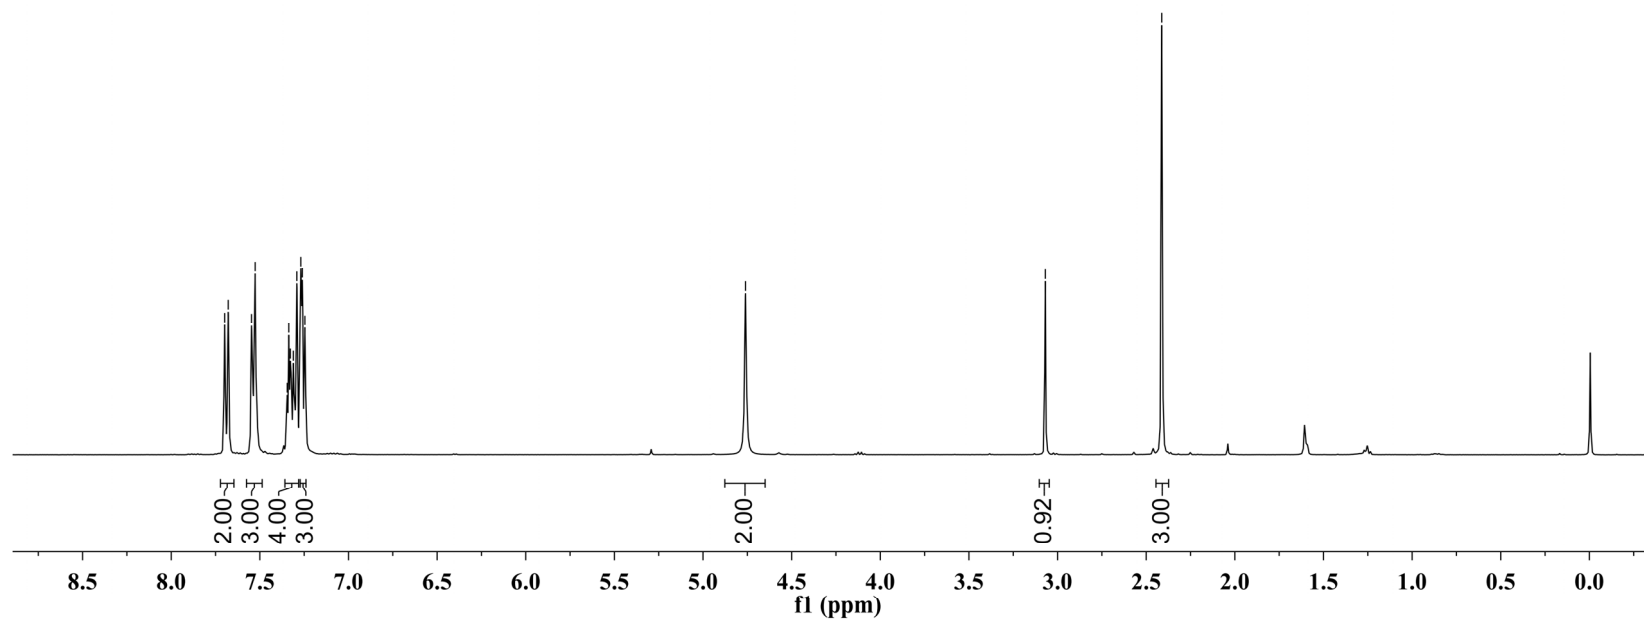

<sup>1</sup>H NMR Spectrum of Compound 1m

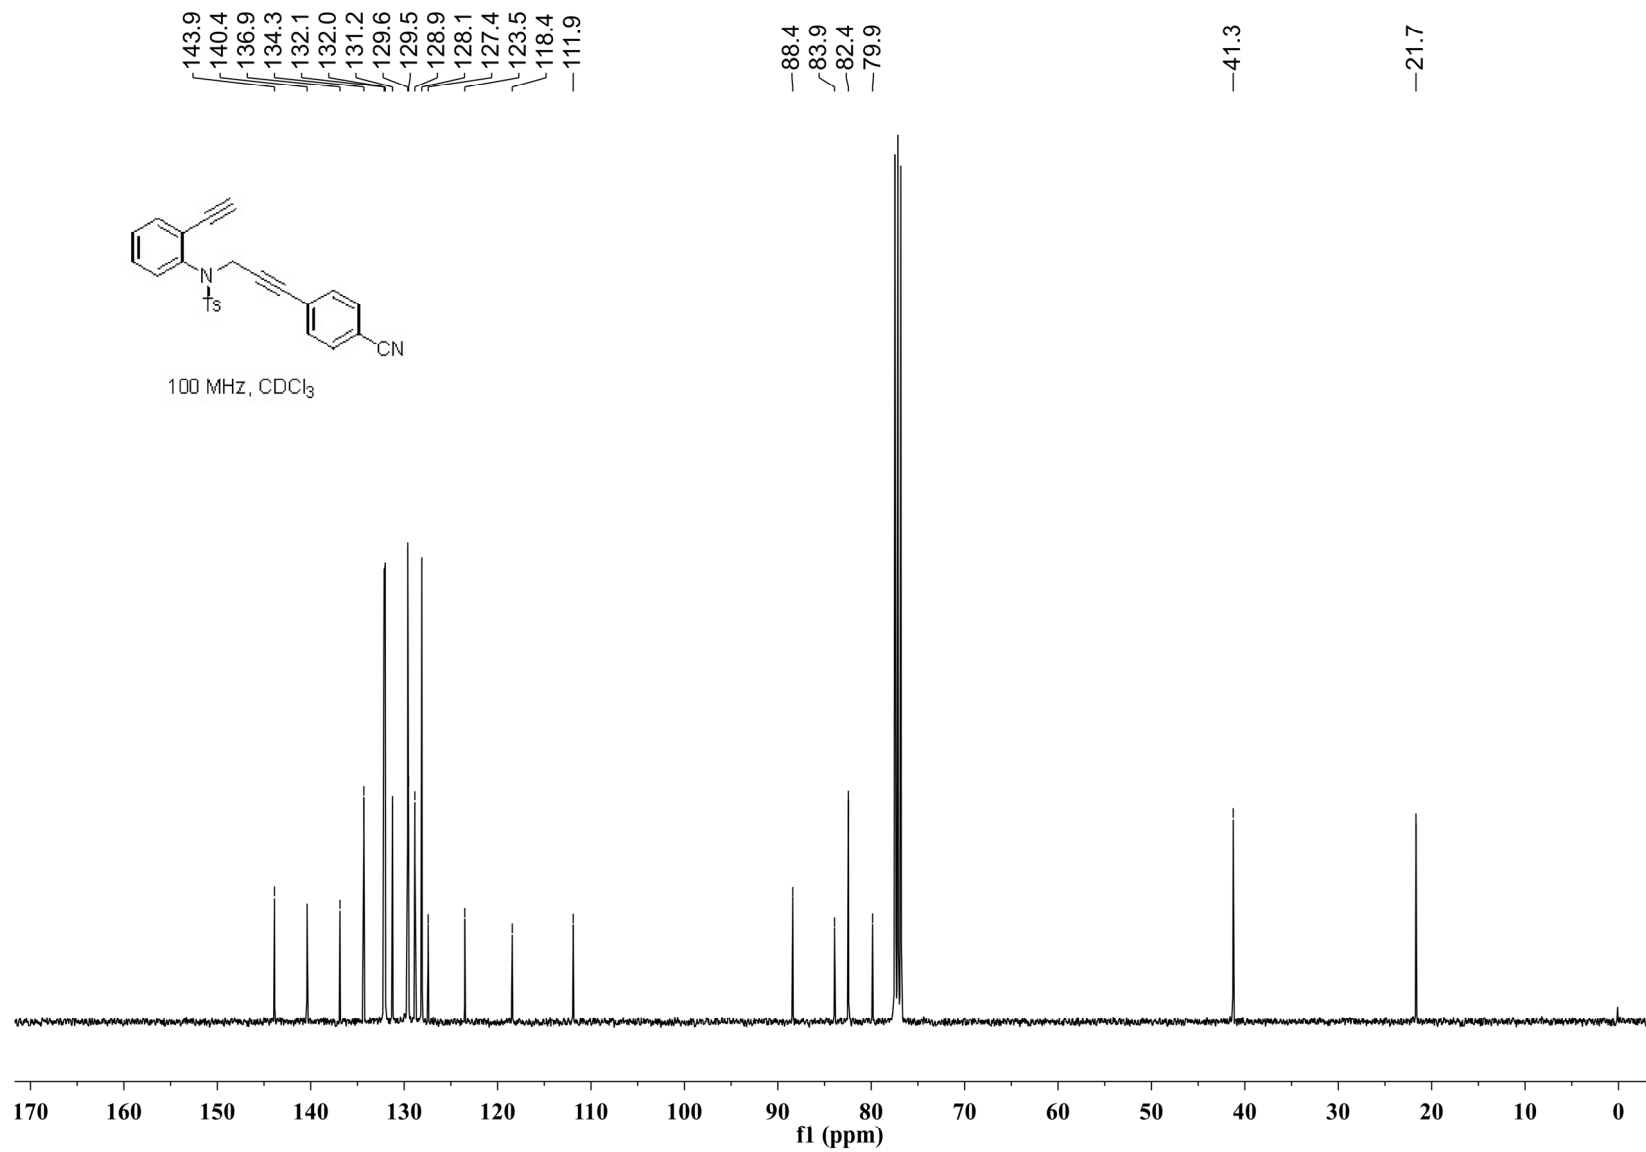

<sup>13</sup>C NMR Spectrum of Compound 1m



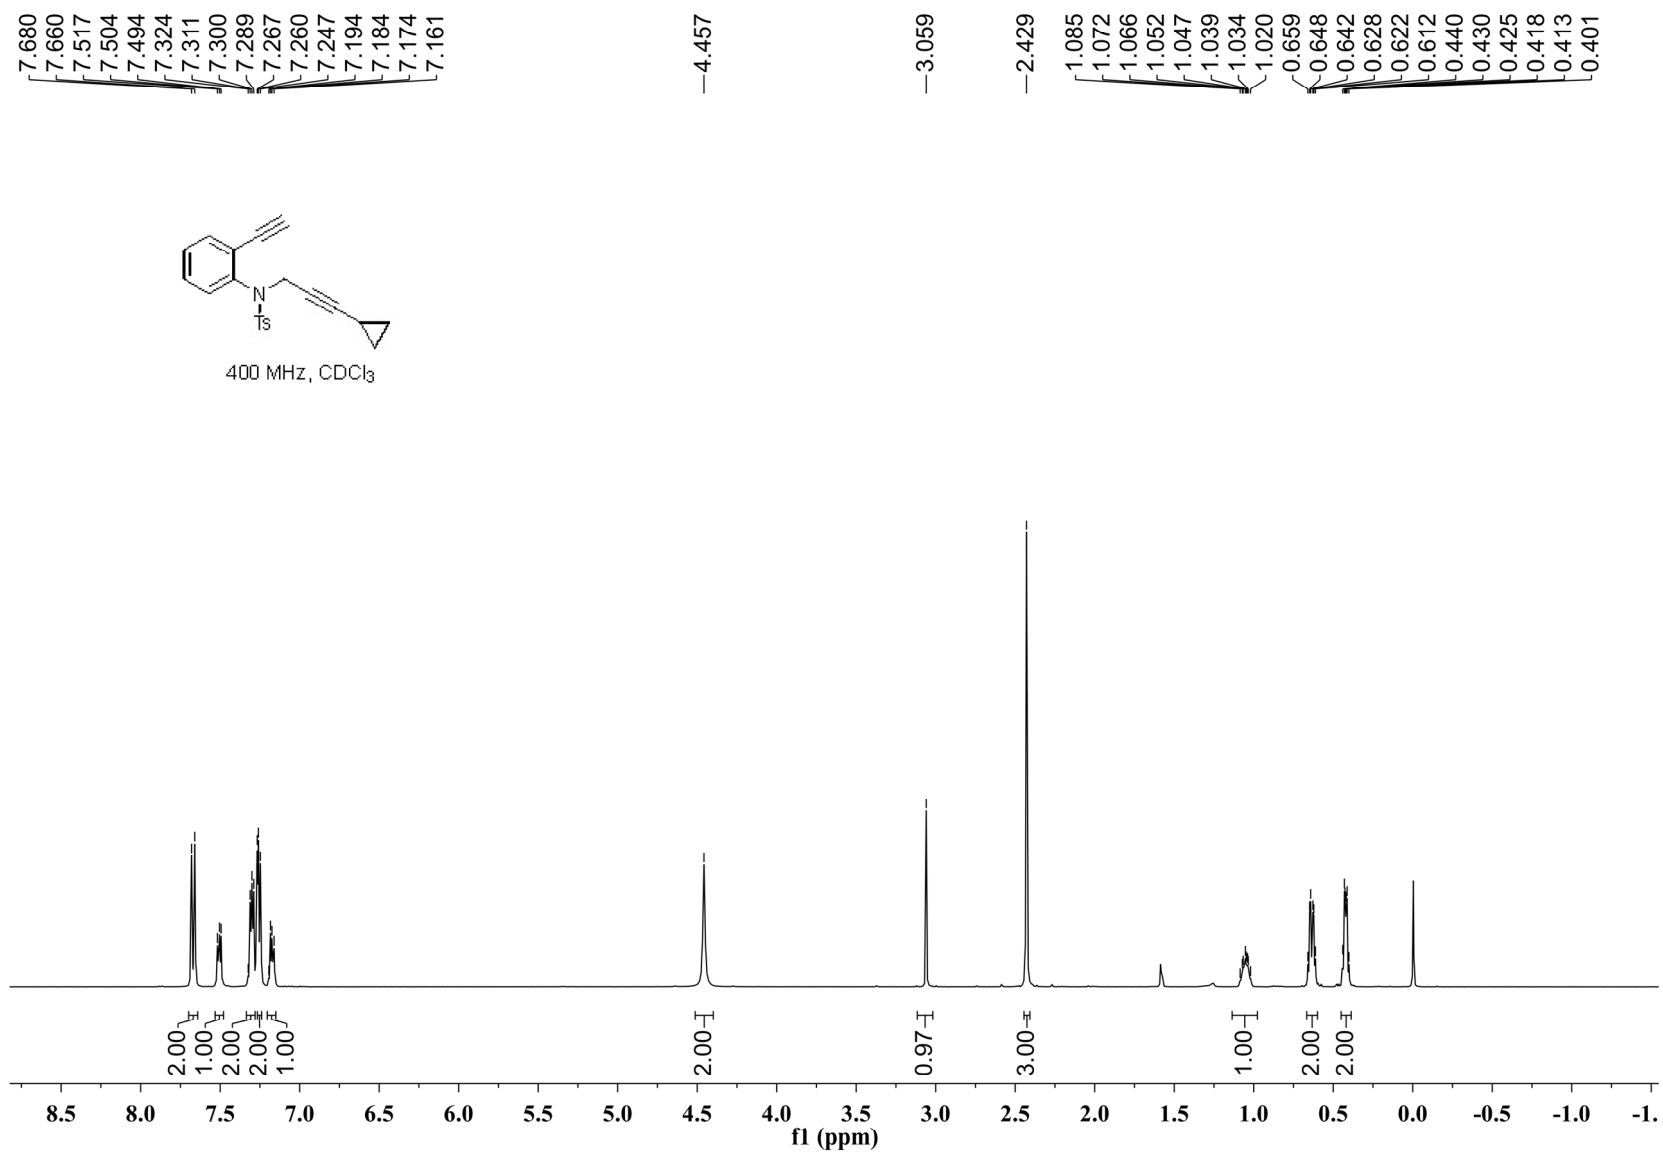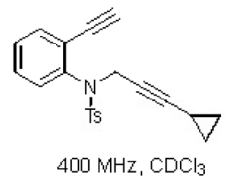

<sup>1</sup>H NMR Spectrum of Compound 1o

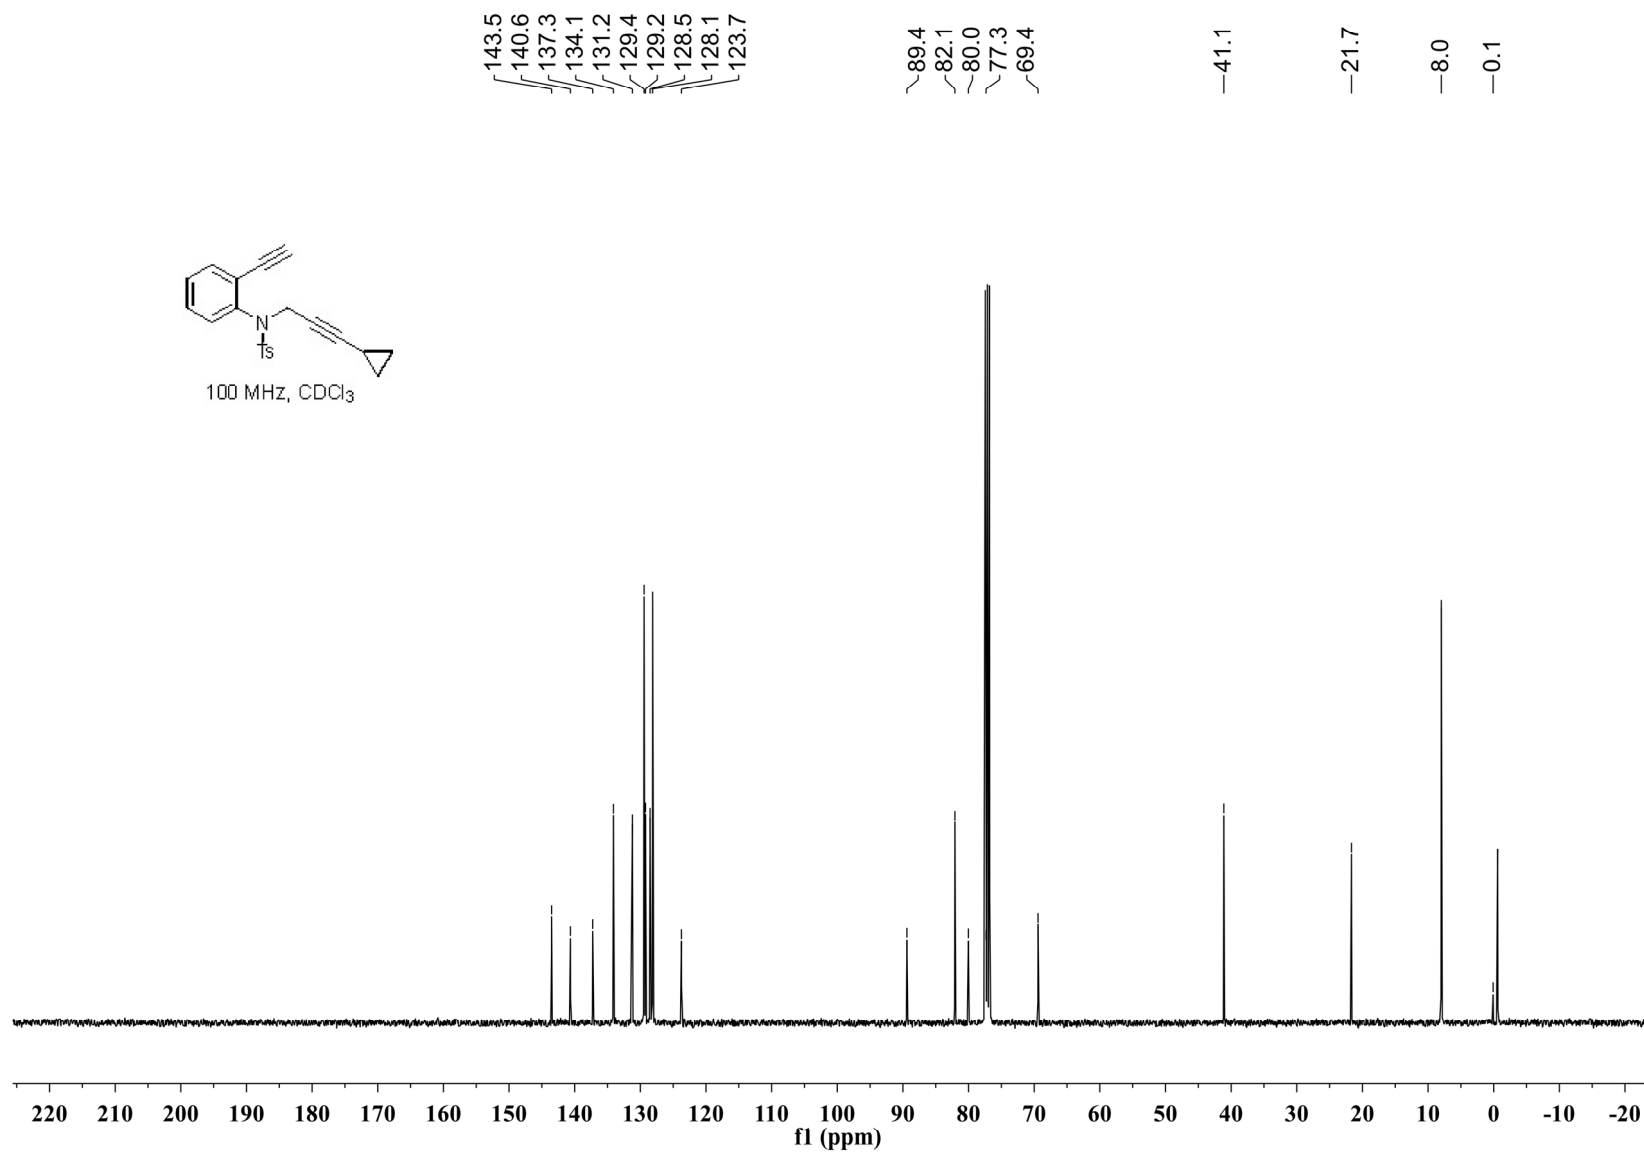

<sup>13</sup>C NMR Spectrum of Compound 1o

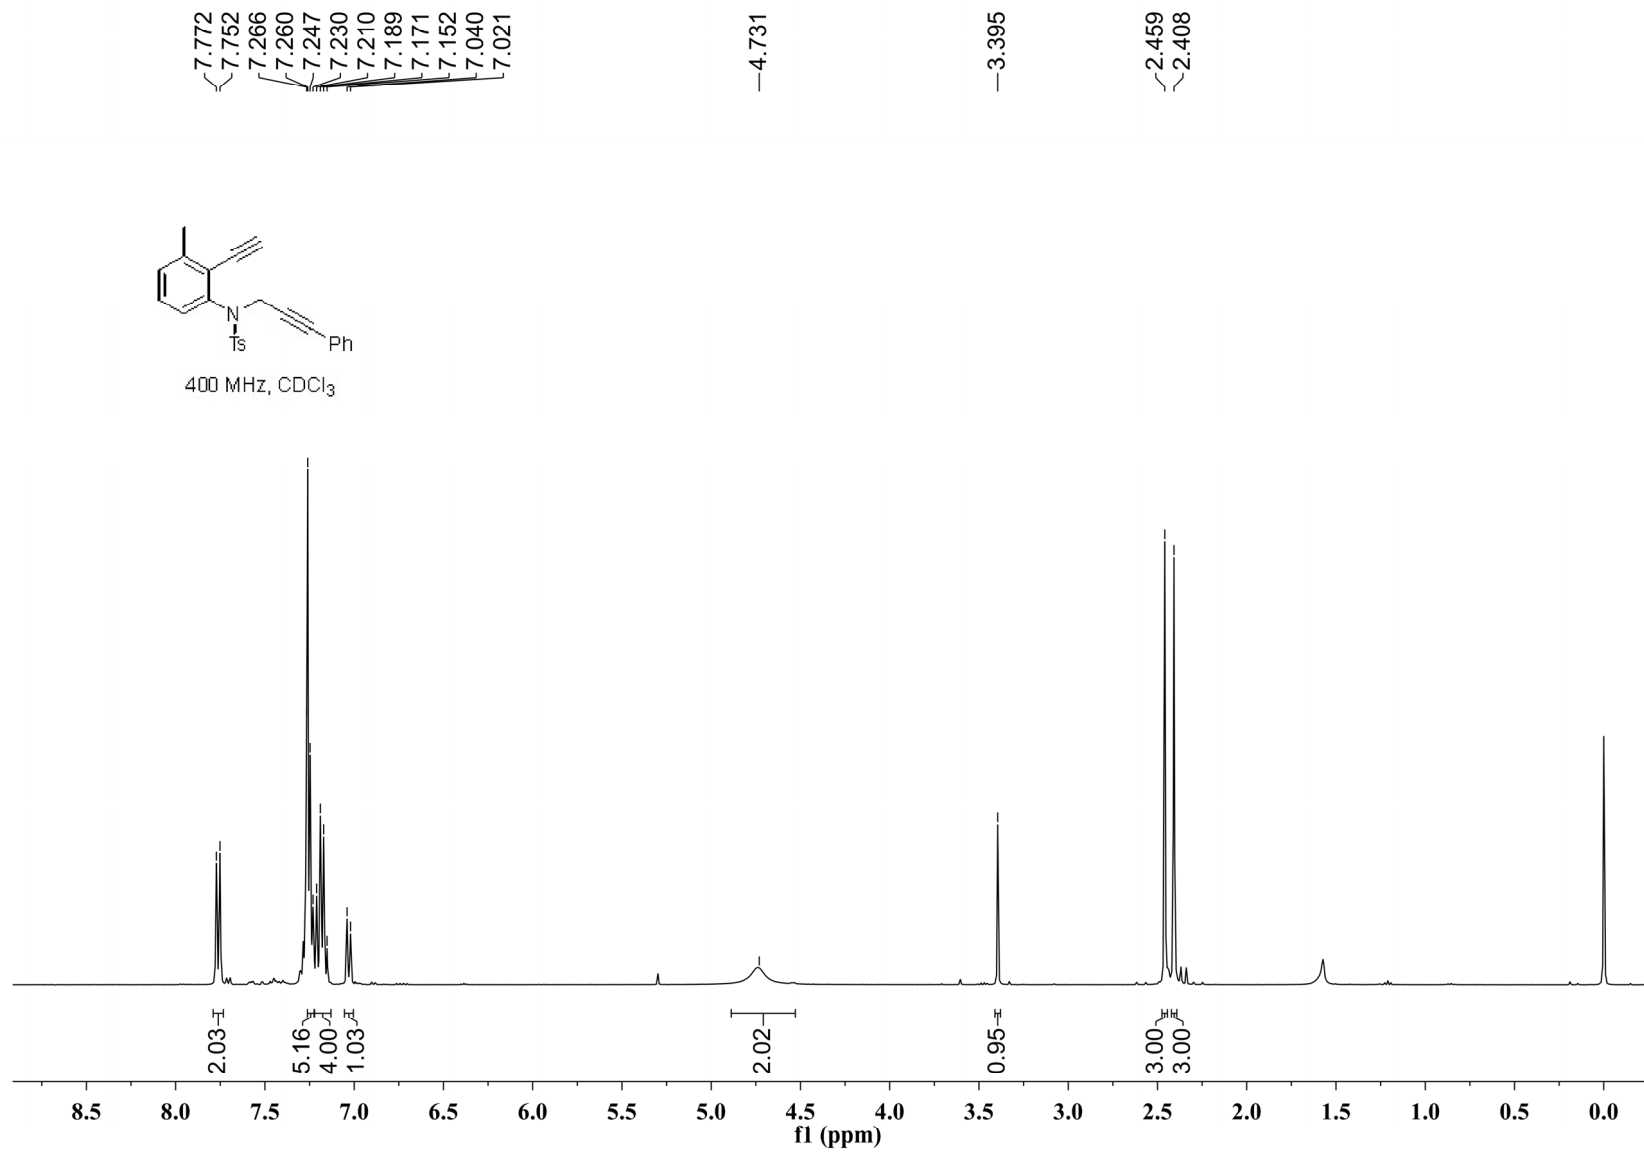

<sup>1</sup>H NMR Spectrum of Compound 1p

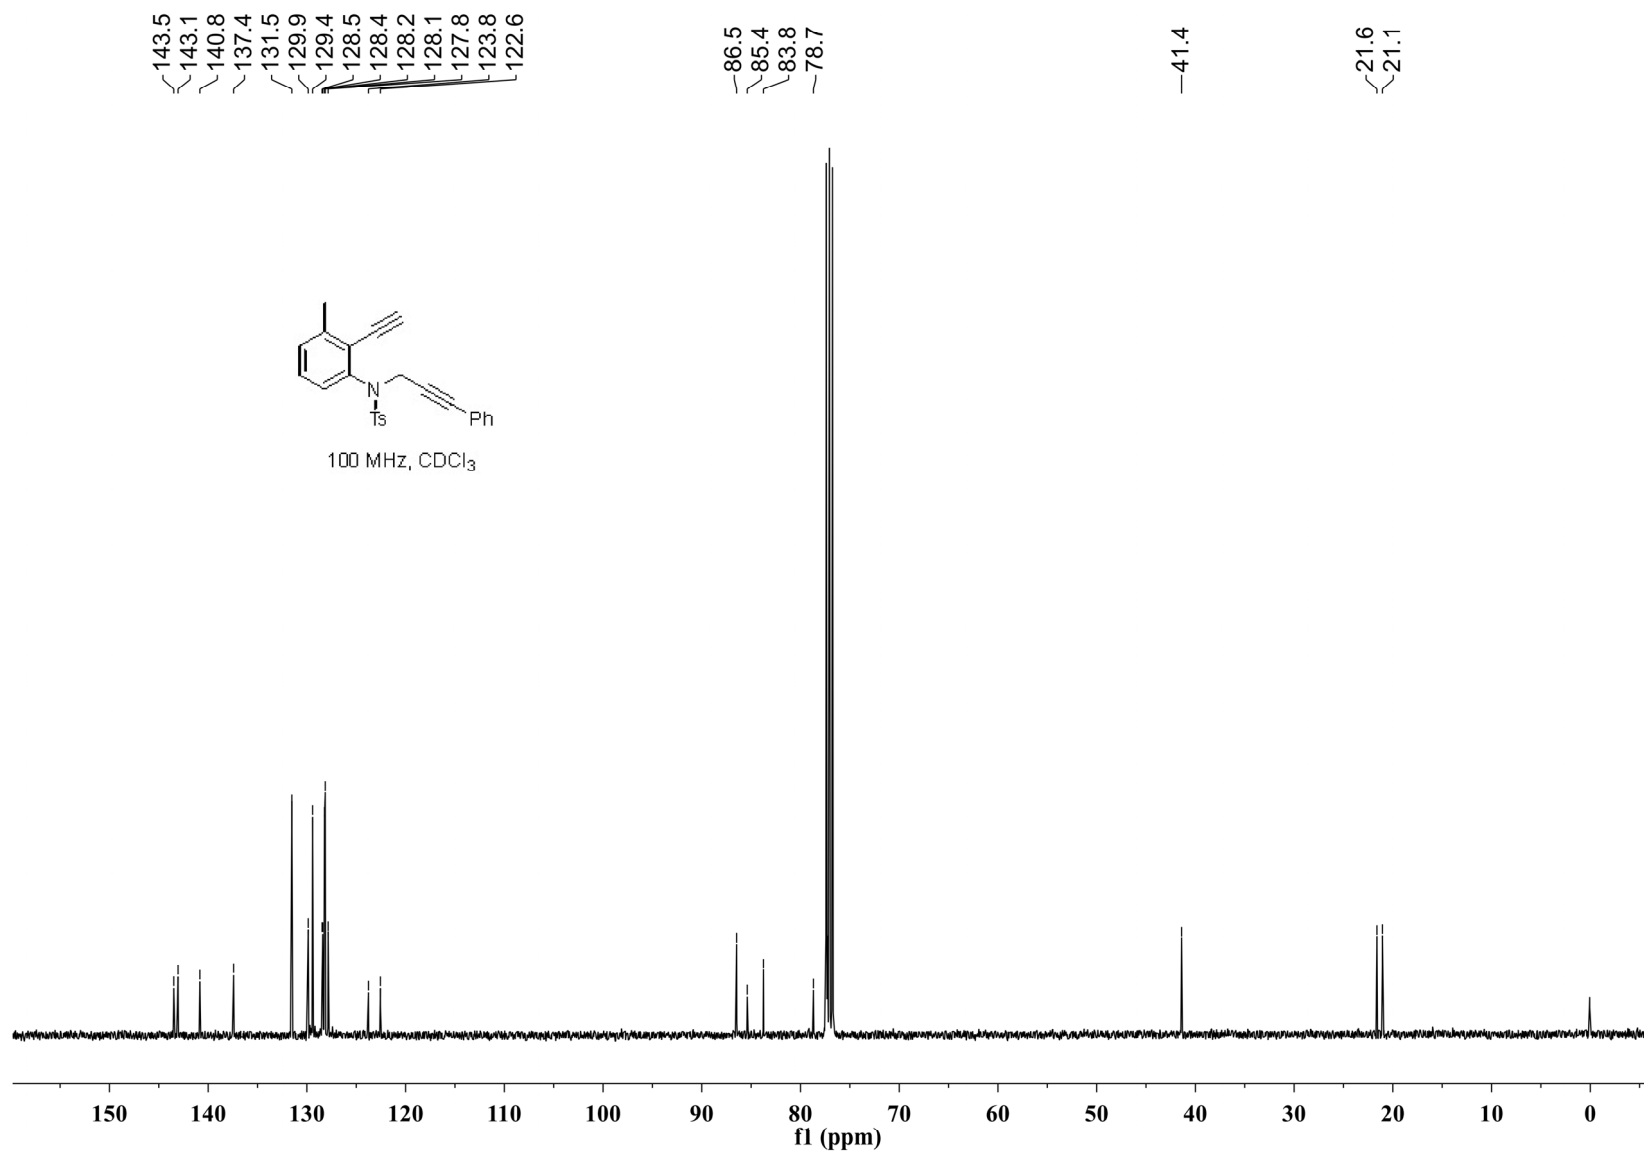

<sup>13</sup>C NMR Spectrum of Compound 1p

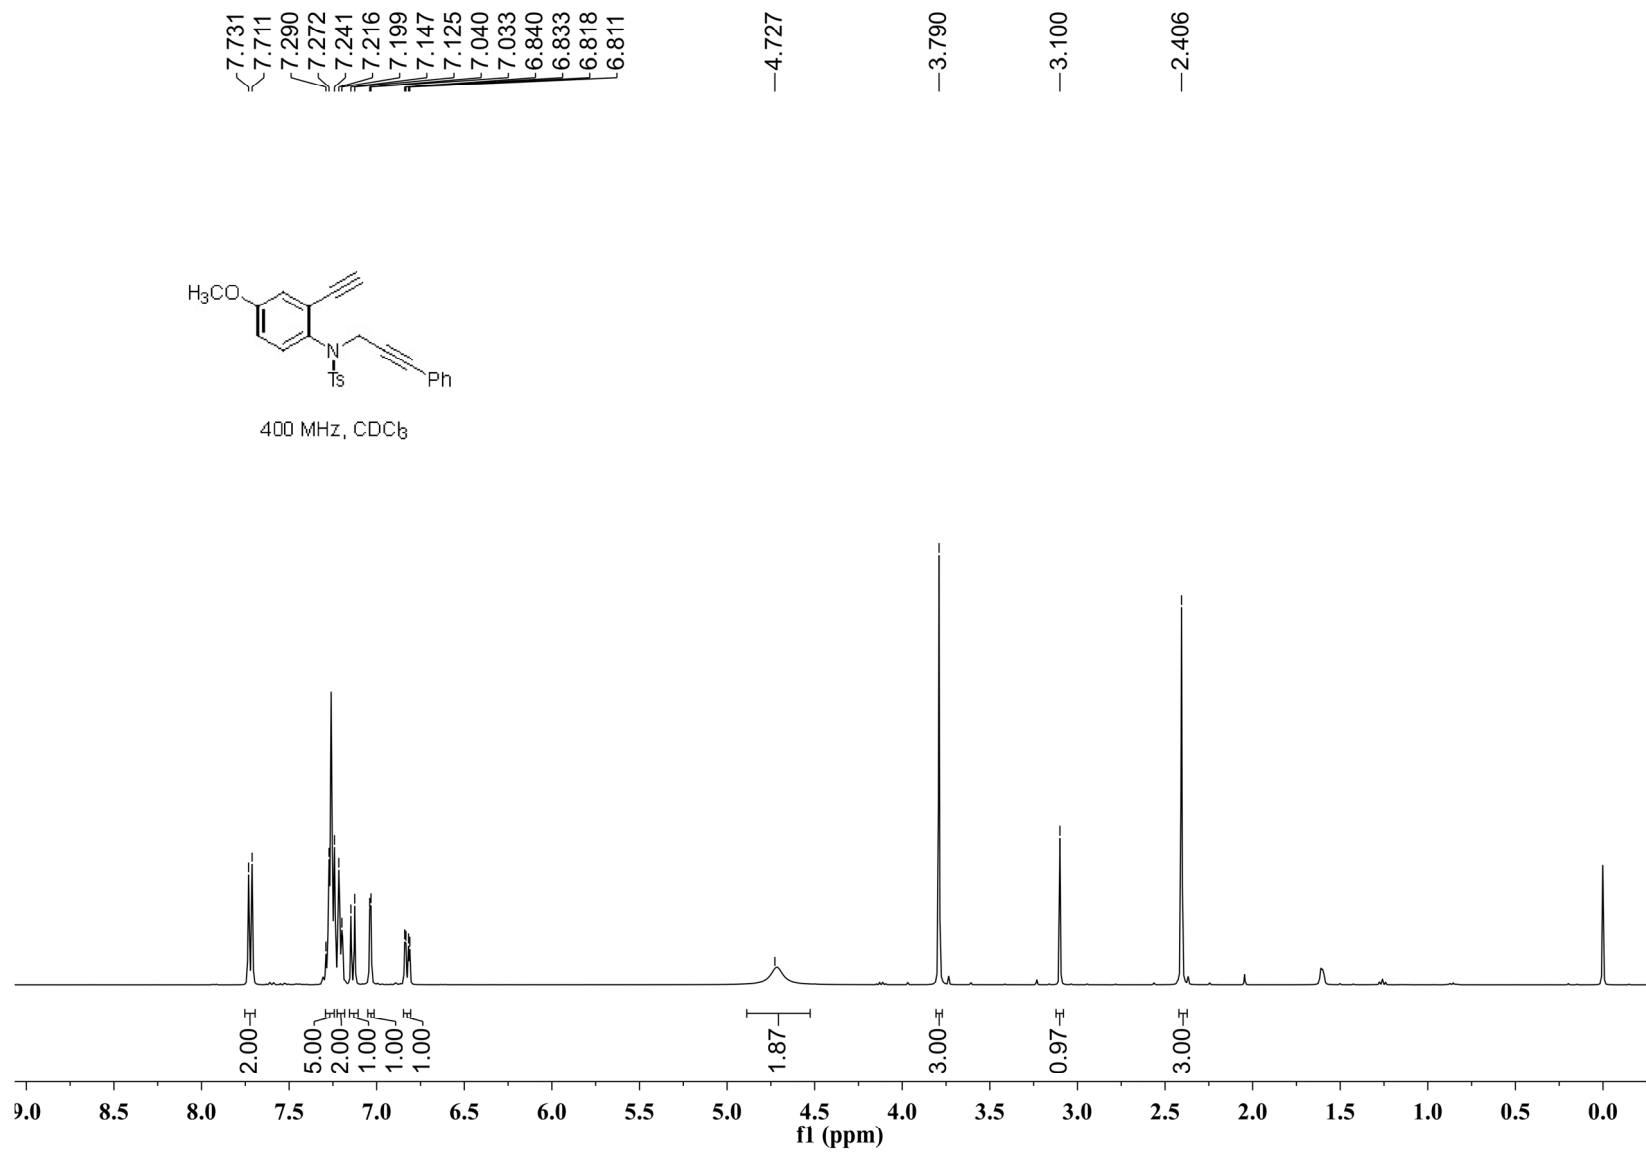

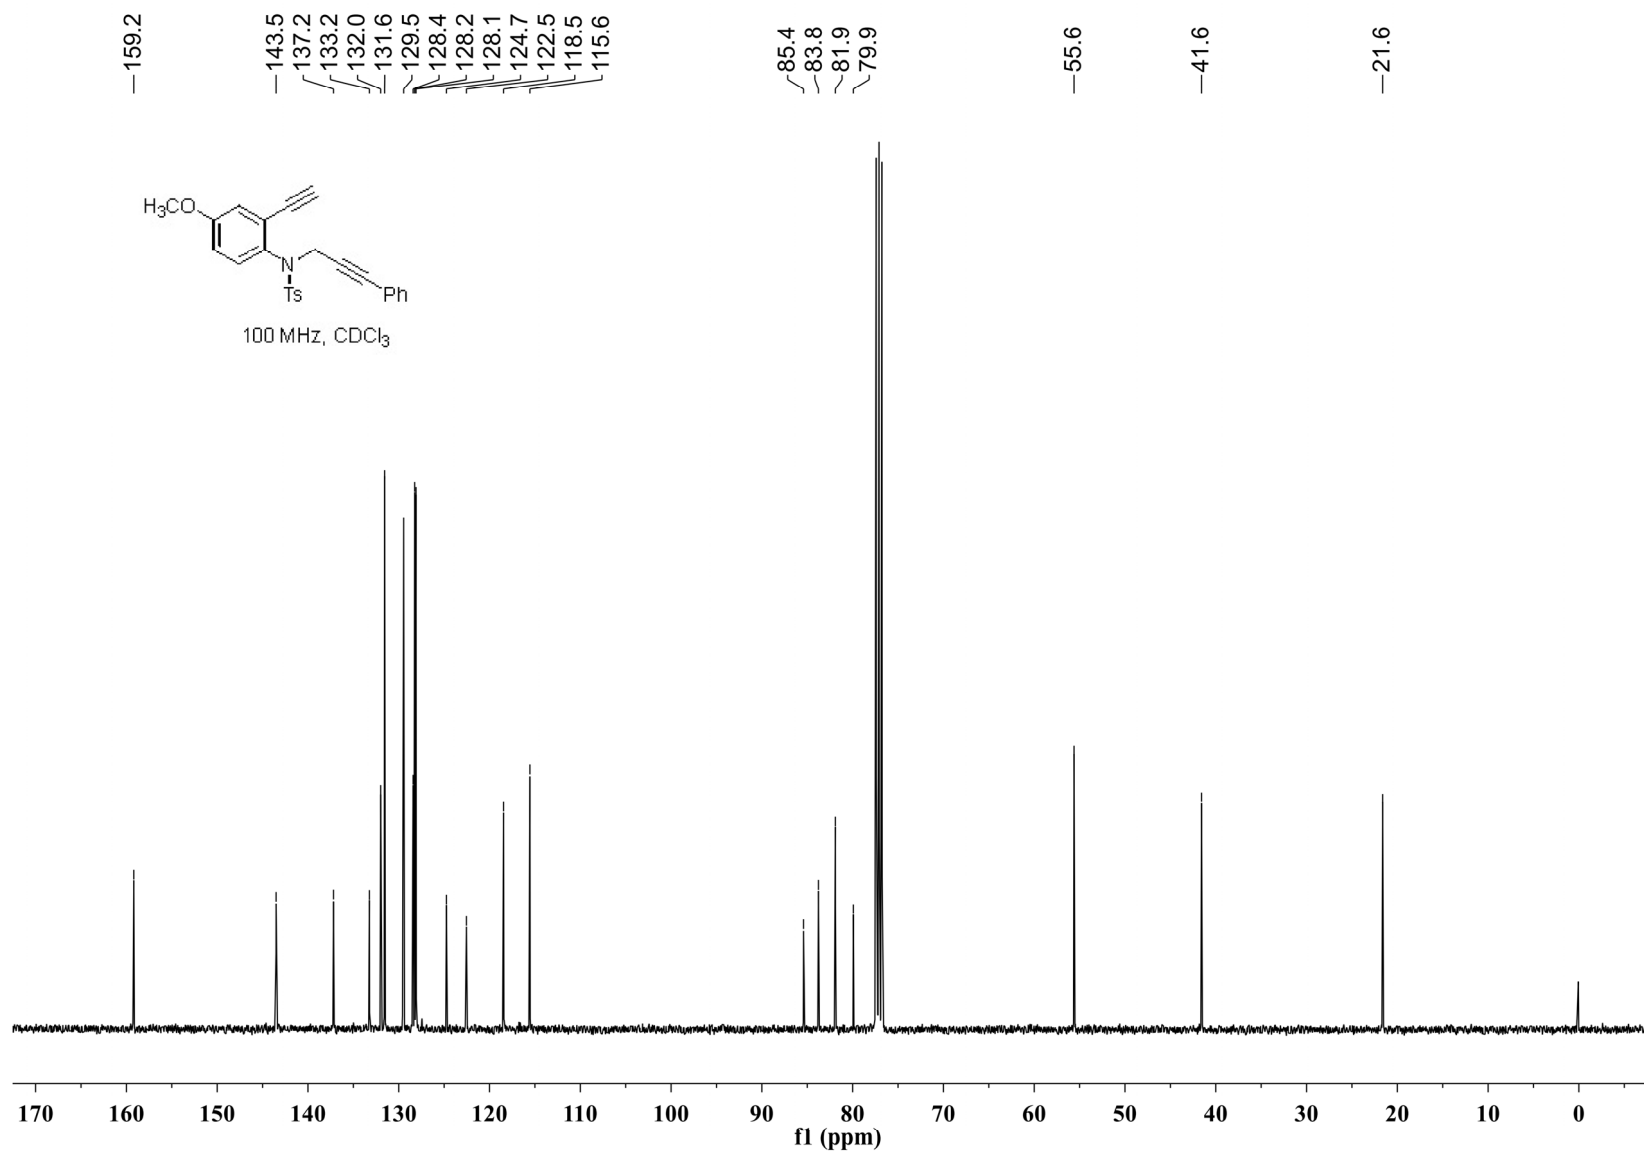

<sup>13</sup>C NMR Spectrum of Compound 1r

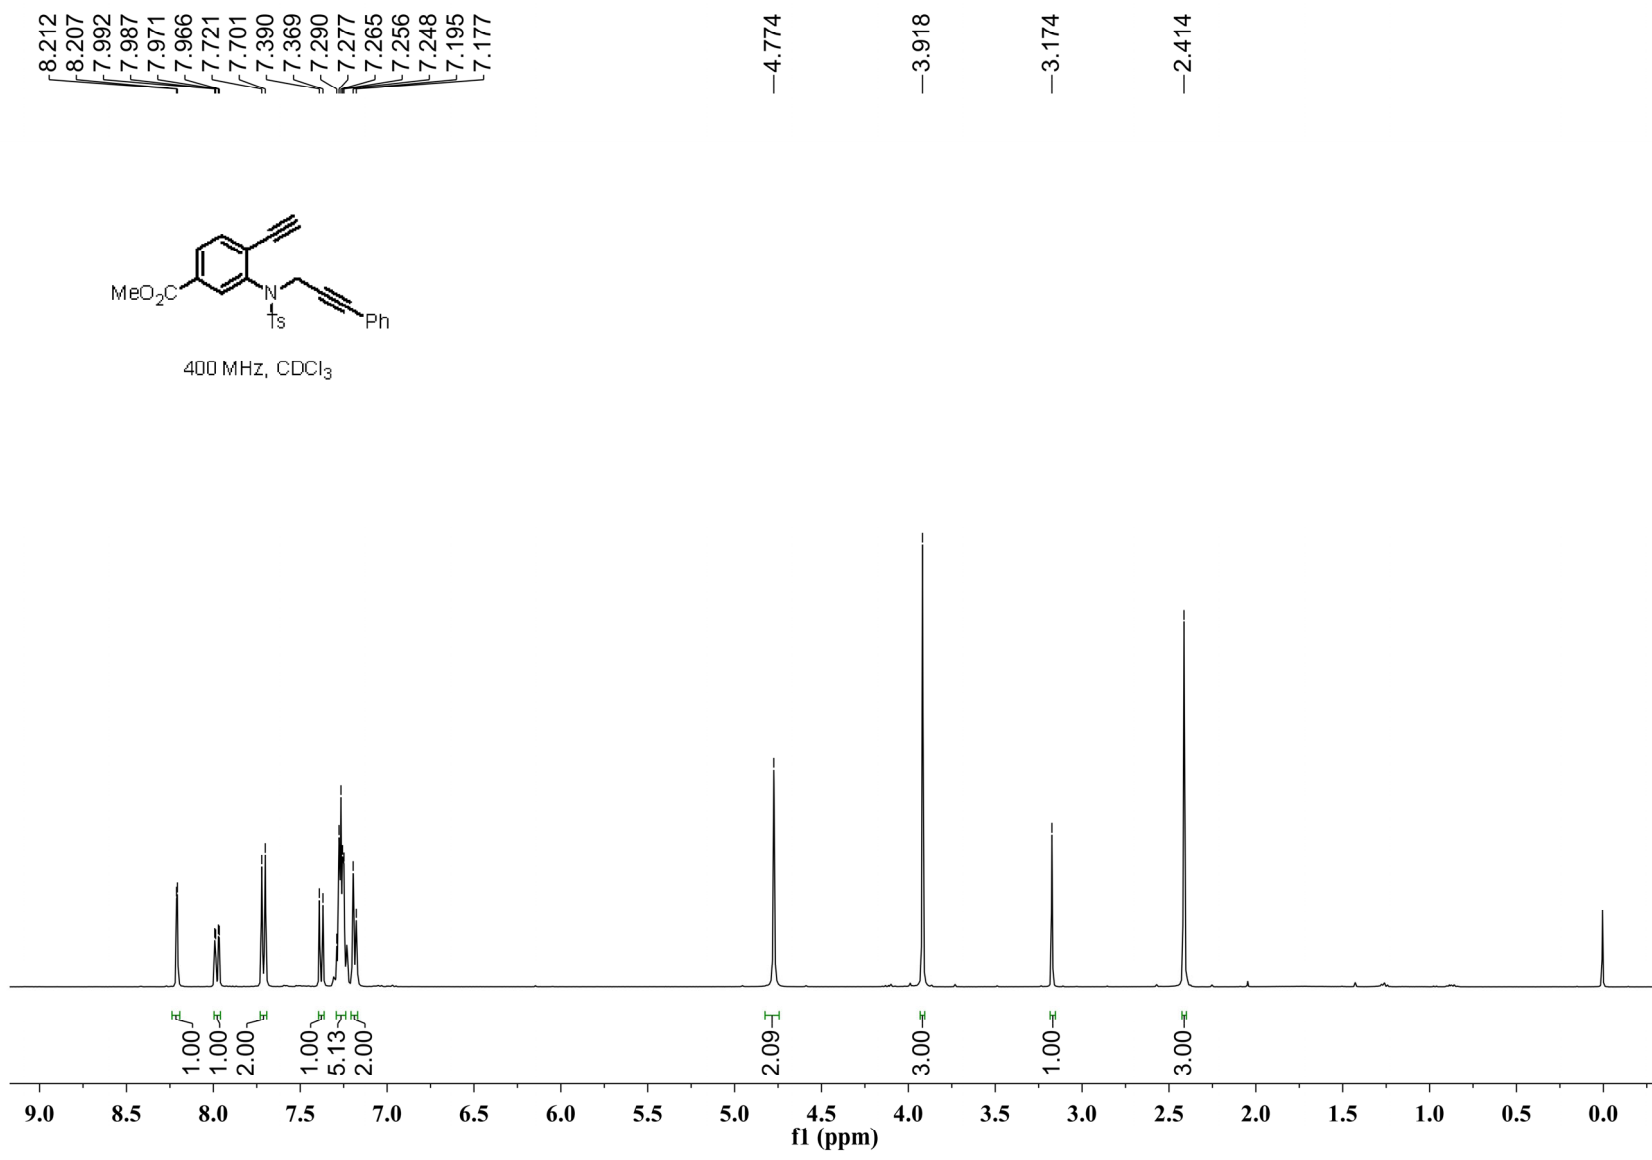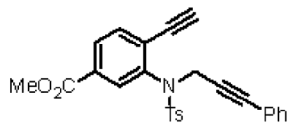

400 MHz, CDCl<sub>3</sub>

<sup>1</sup>H NMR Spectrum of Compound 1t

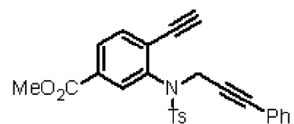

100 MHz, CDCl<sub>3</sub>

165.6  
144.4  
144.0  
136.7  
135.4  
131.6  
131.2  
130.4  
130.3  
129.6  
128.6  
128.3  
128.1  
123.9  
122.2

85.9  
83.2  
83.0  
79.1

52.6

41.2

21.6

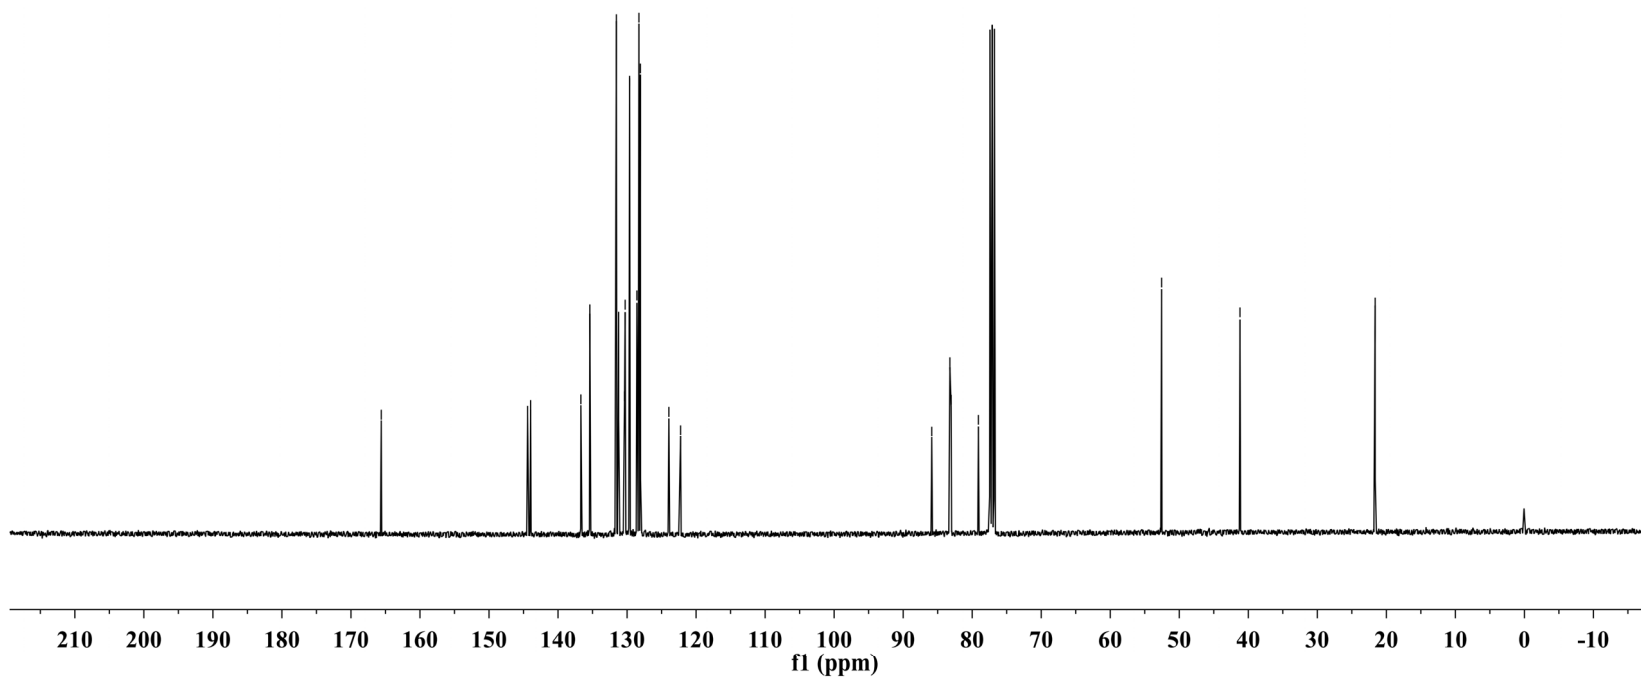

<sup>13</sup>C NMR Spectrum of Compound 1t



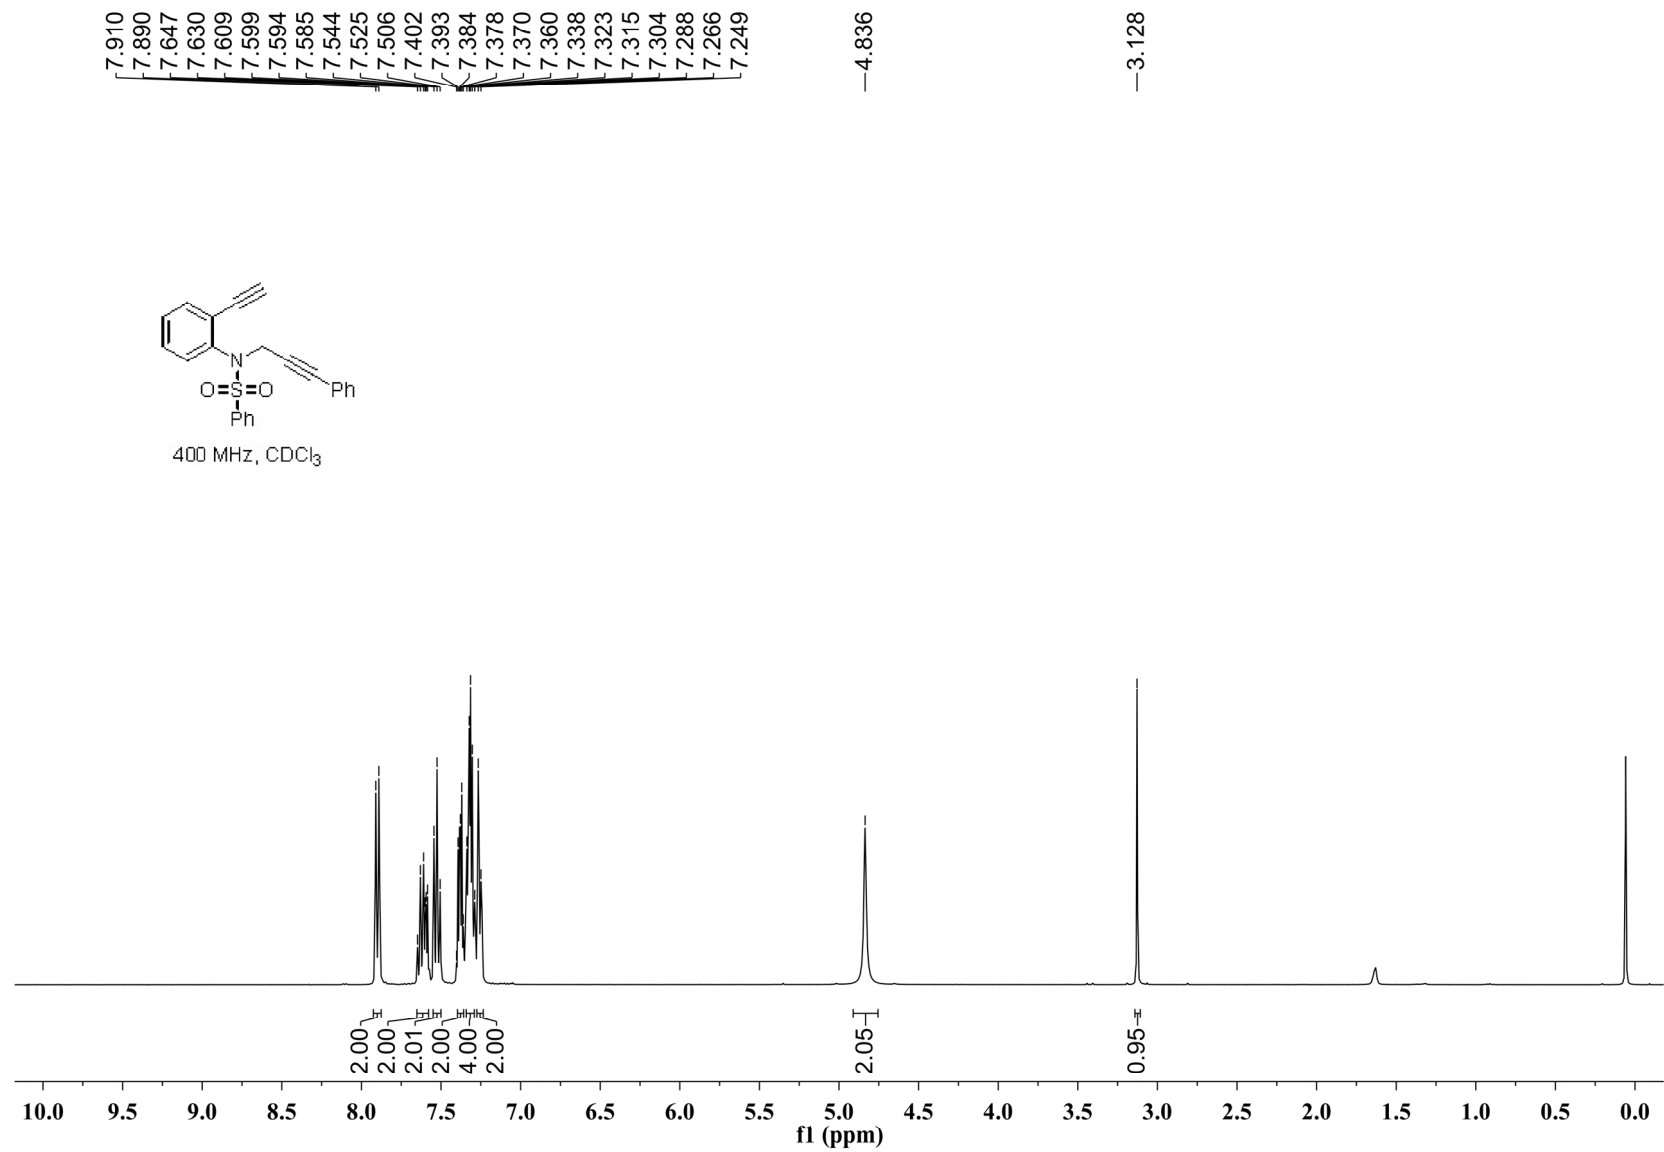

<sup>1</sup>H NMR Spectrum of Compound 1v

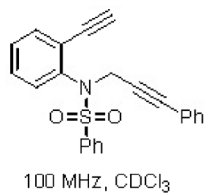

140.4  
140.1  
134.3  
132.9  
131.6  
131.4  
129.5  
129.0  
128.8  
128.5  
128.3  
128.1  
123.7  
122.5

85.7  
83.5  
82.3  
79.9

-41.5

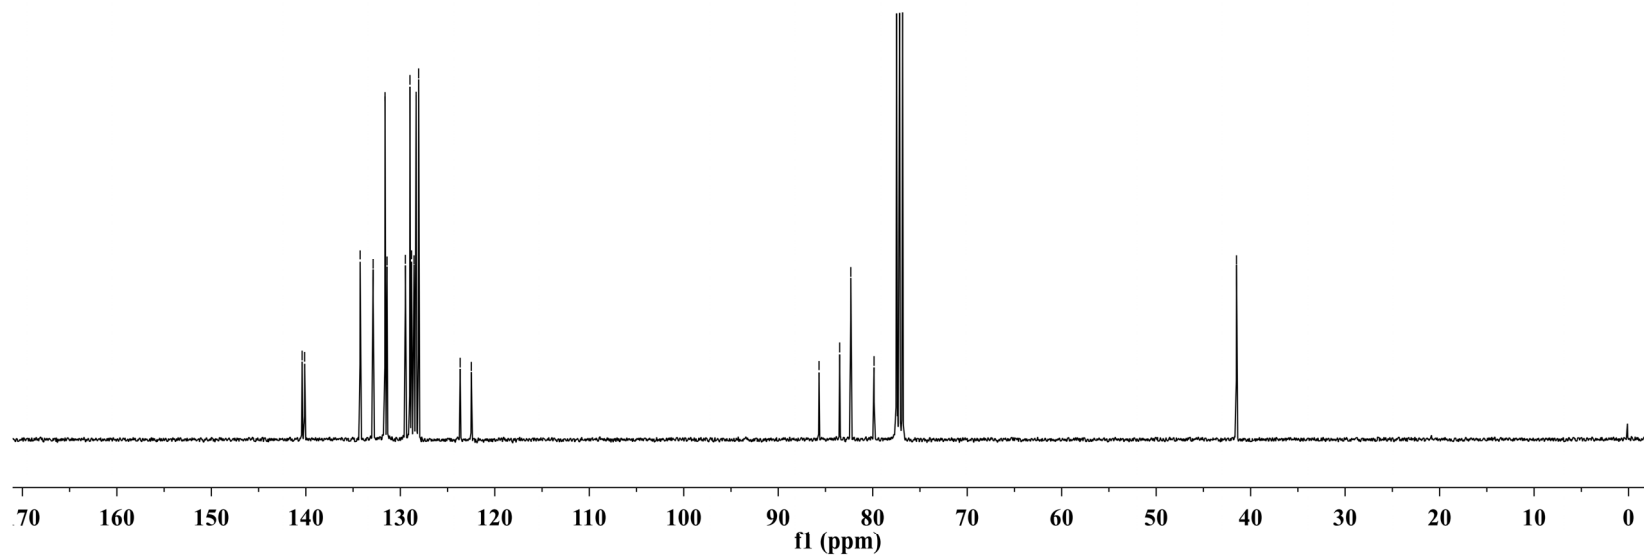

<sup>13</sup>C NMR Spectrum of Compound 1v



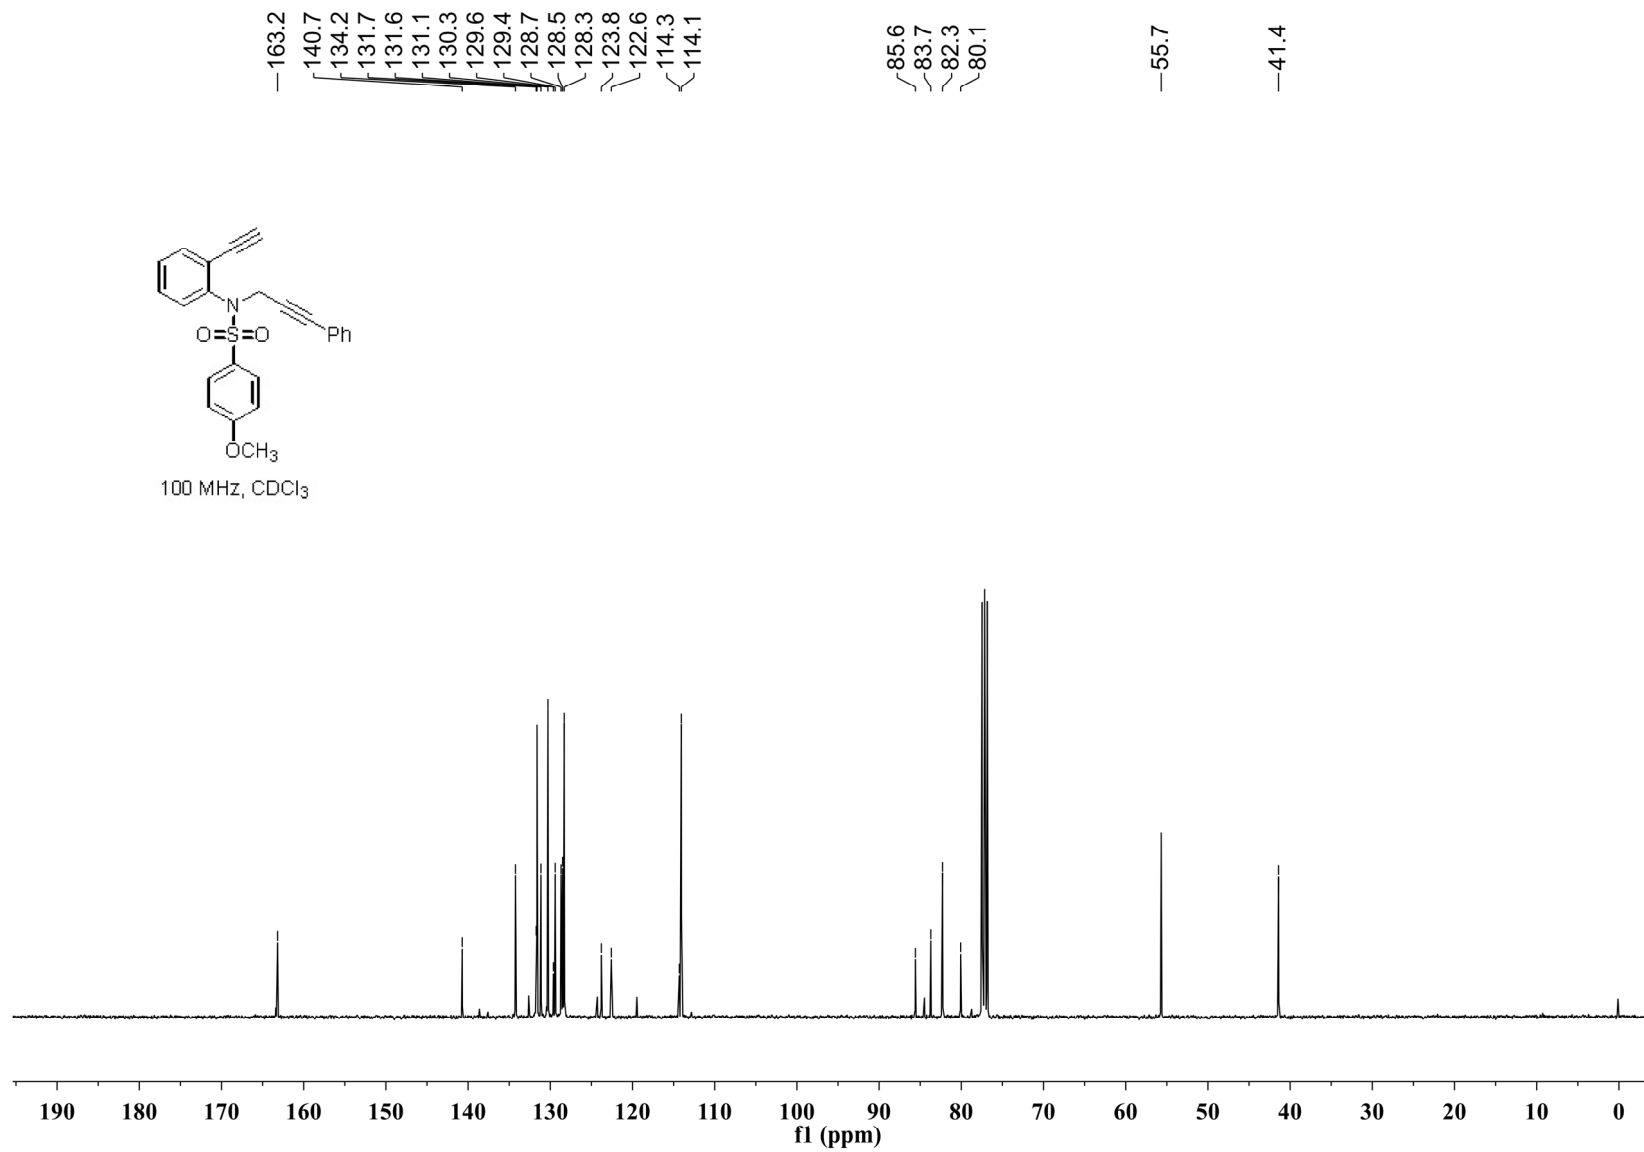

<sup>13</sup>C NMR Spectrum of Compound 1w

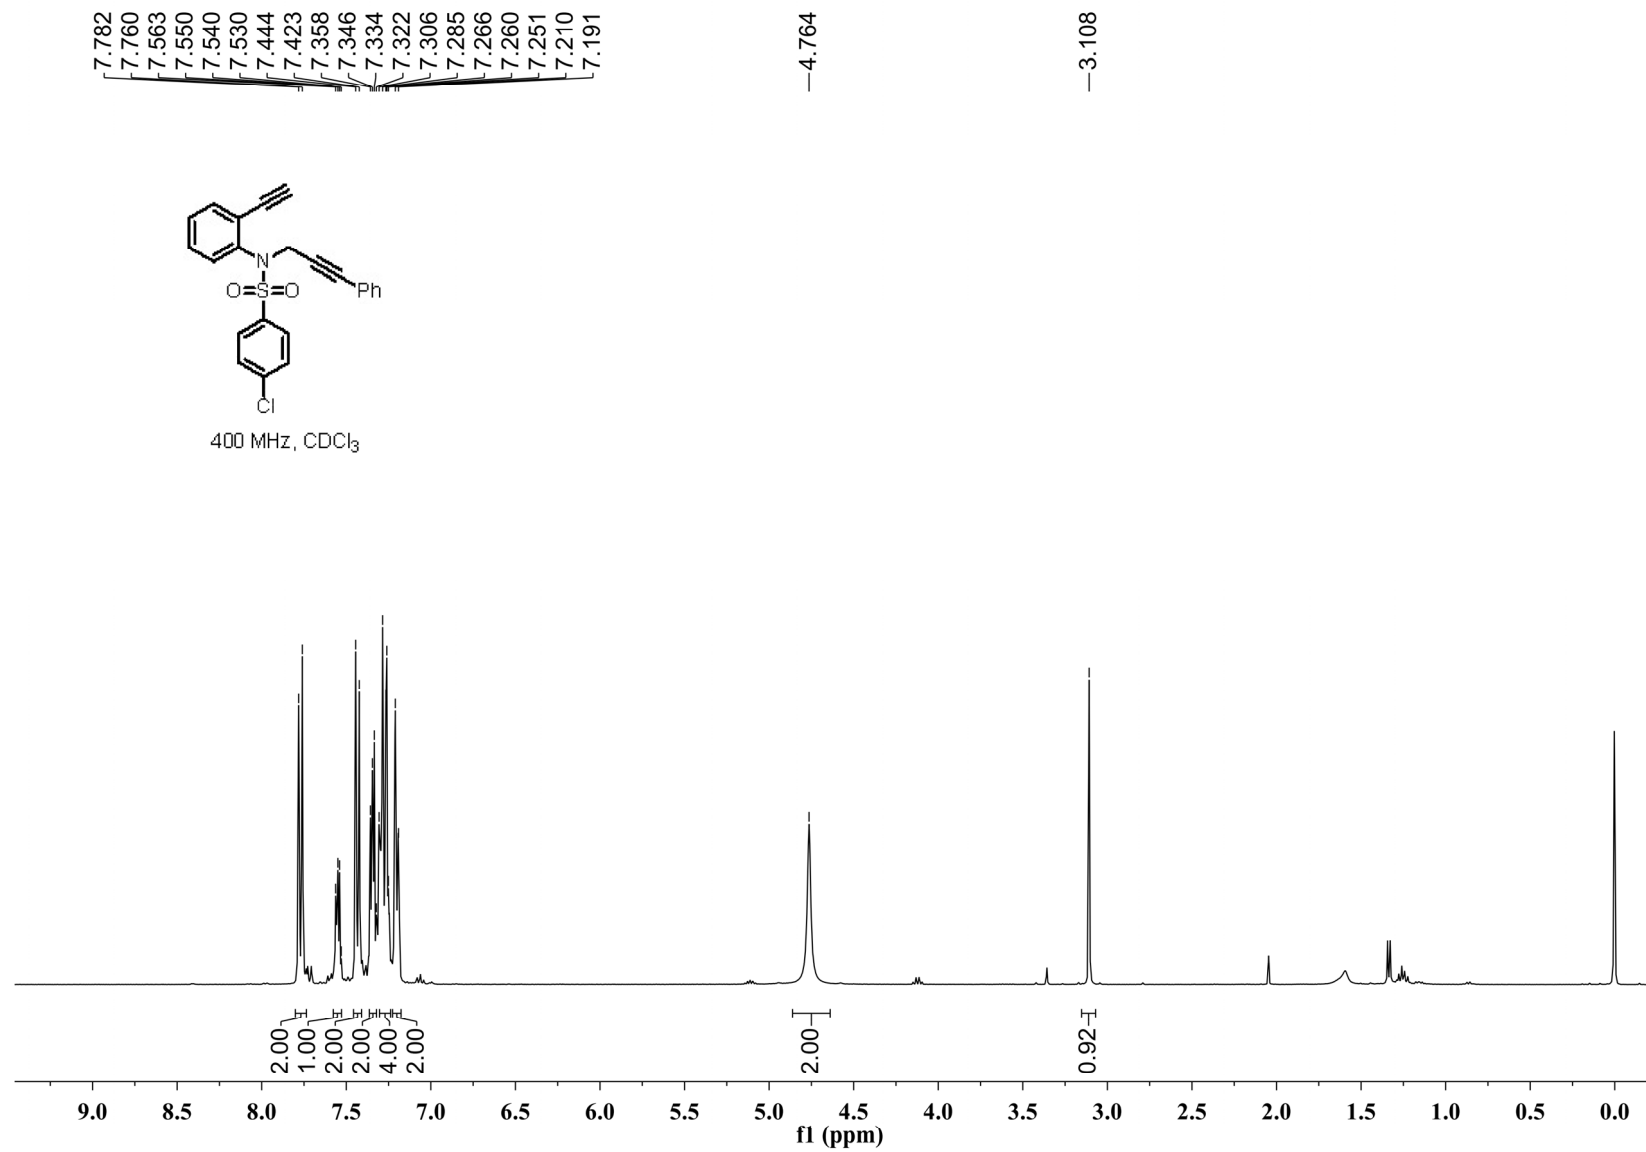

<sup>1</sup>H NMR Spectrum of Compound 1x

140.2  
139.4  
138.7  
134.4  
131.3  
129.6  
129.5  
129.5  
129.2  
129.0  
128.7  
128.4  
123.6  
122.3

85.9  
83.3  
82.5  
79.8

41.6

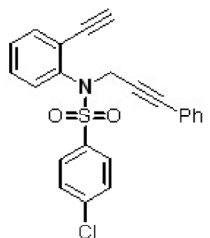

100 MHz, CDCl<sub>3</sub>

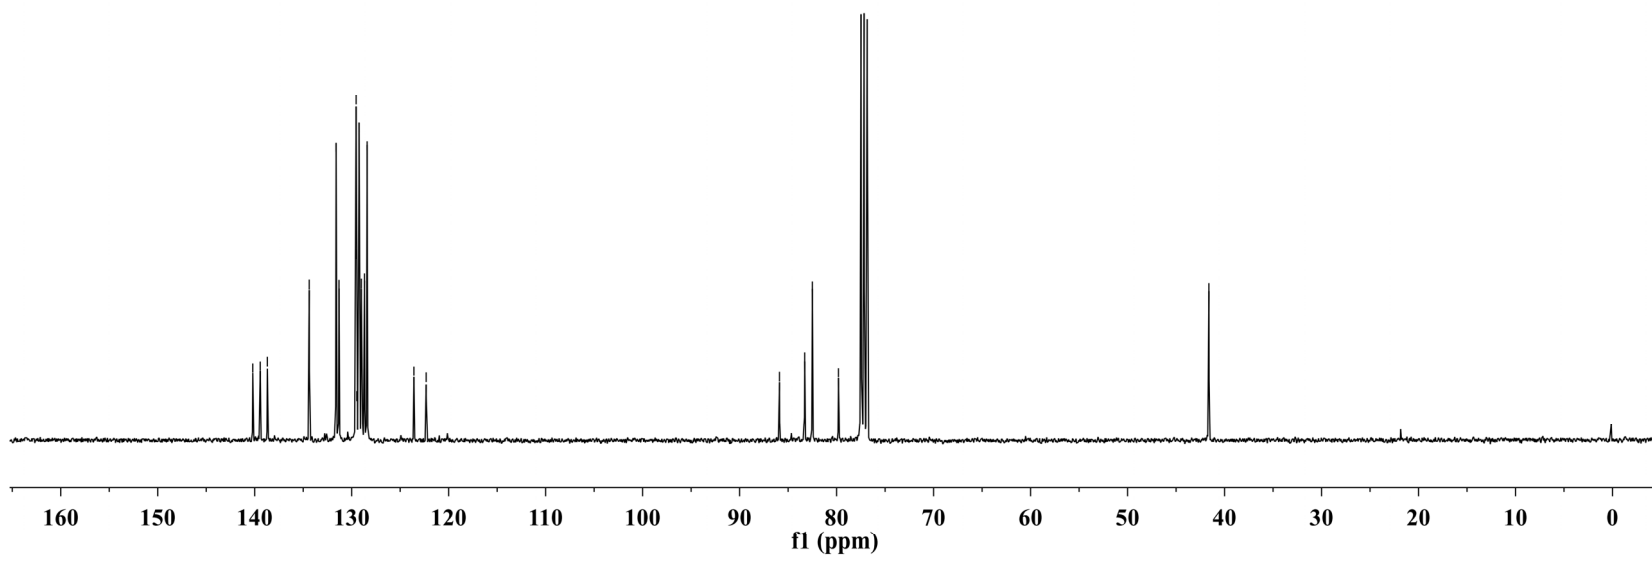

<sup>13</sup>C NMR Spectrum of Compound 1x

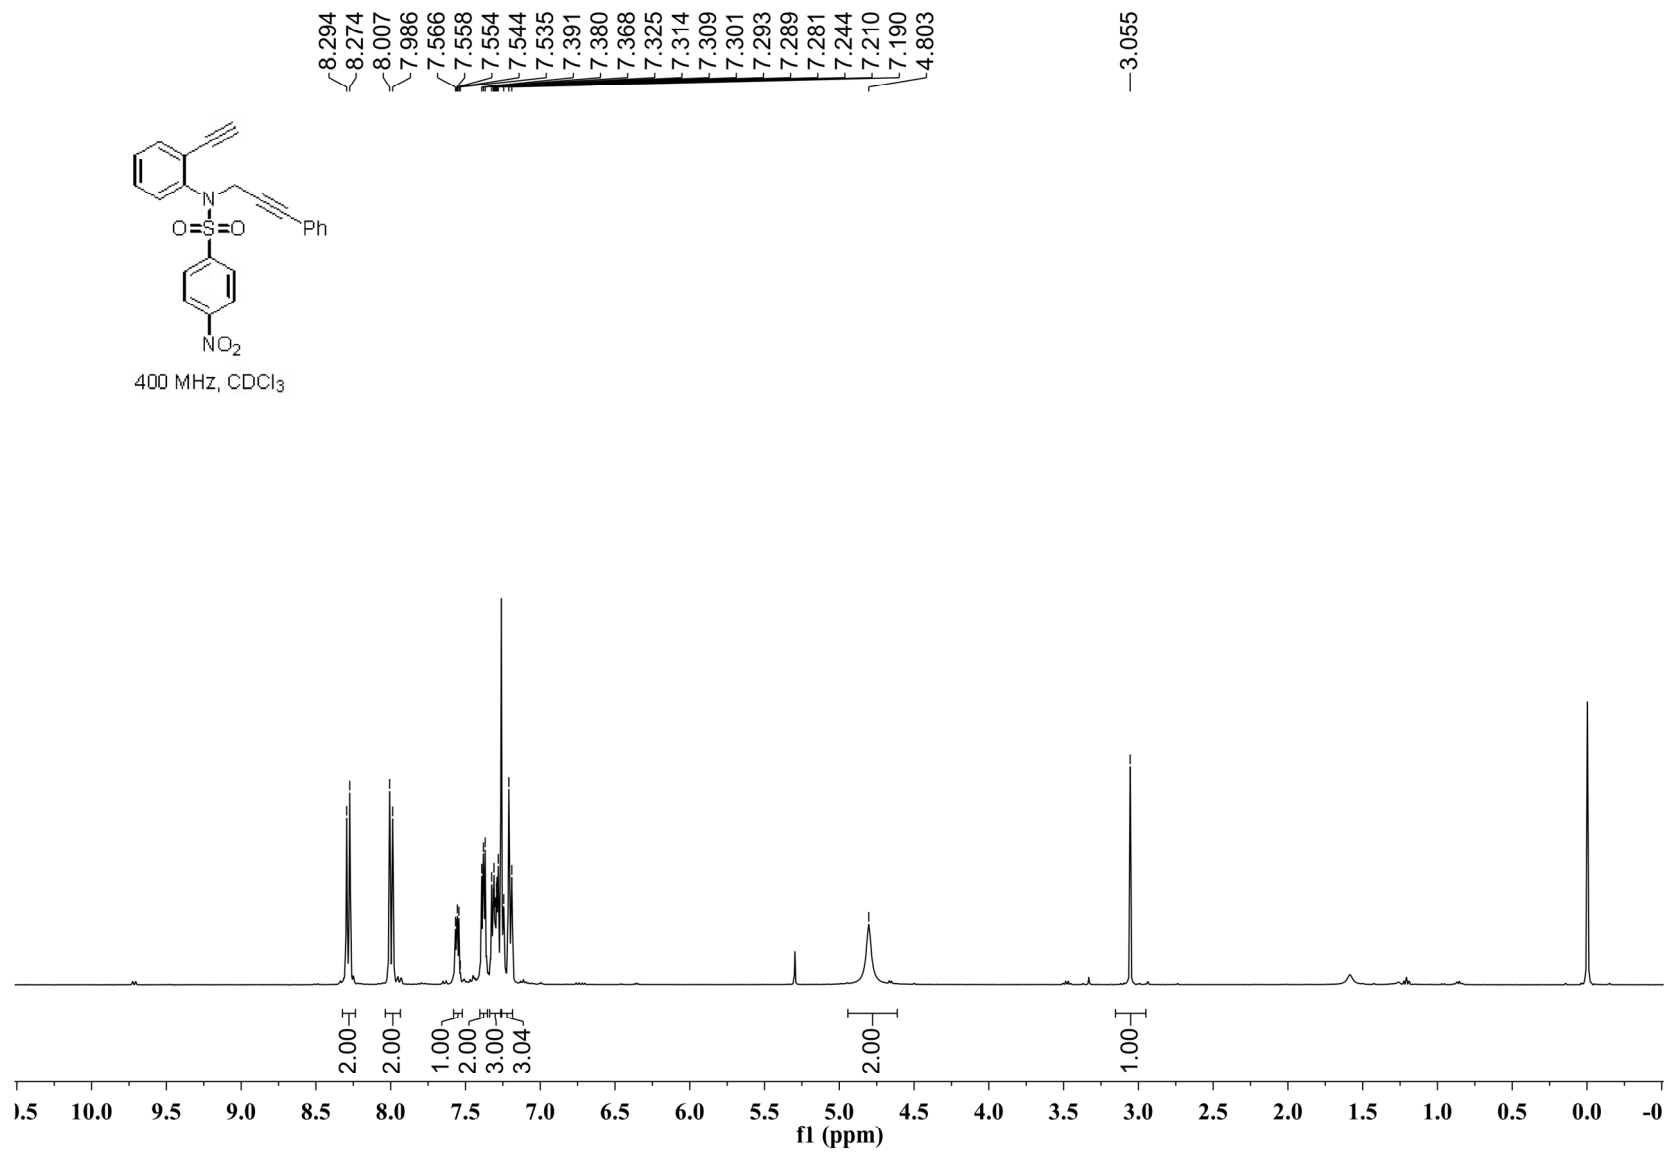

<sup>1</sup>H NMR Spectrum of Compound 1y

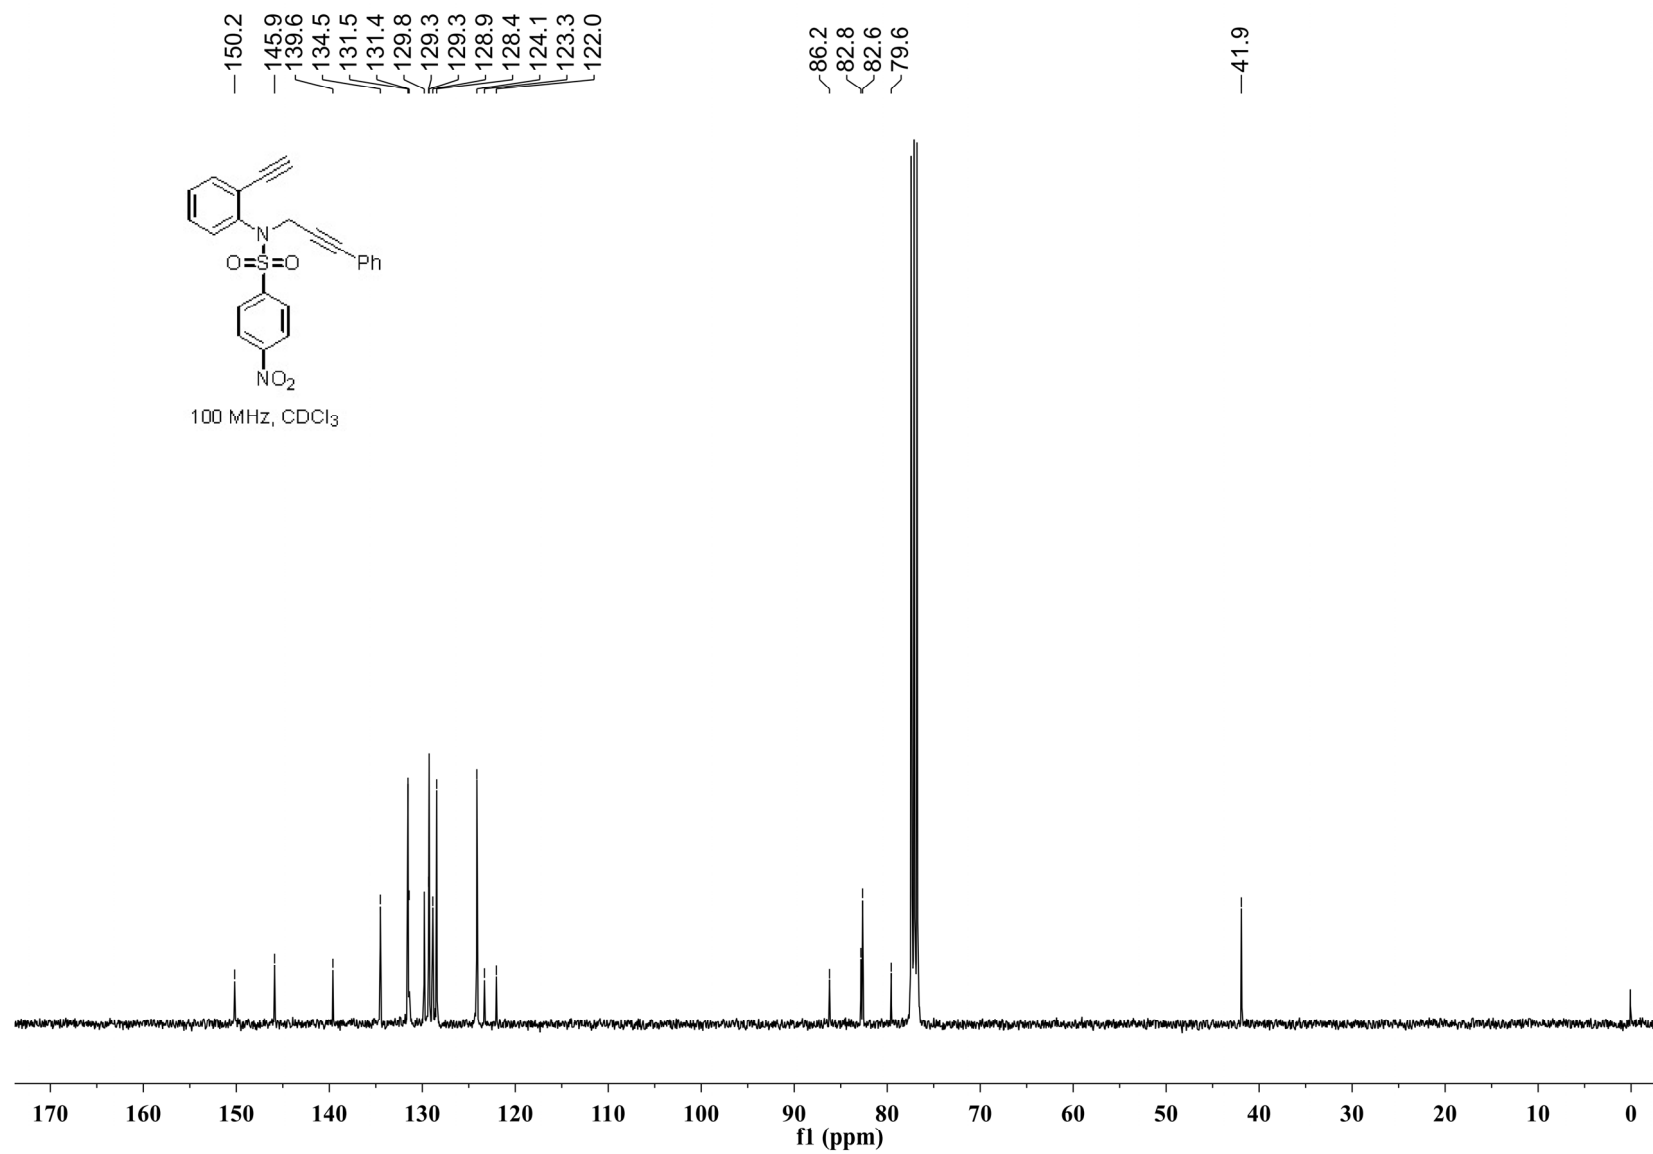

<sup>13</sup>C NMR Spectrum of Compound 1y



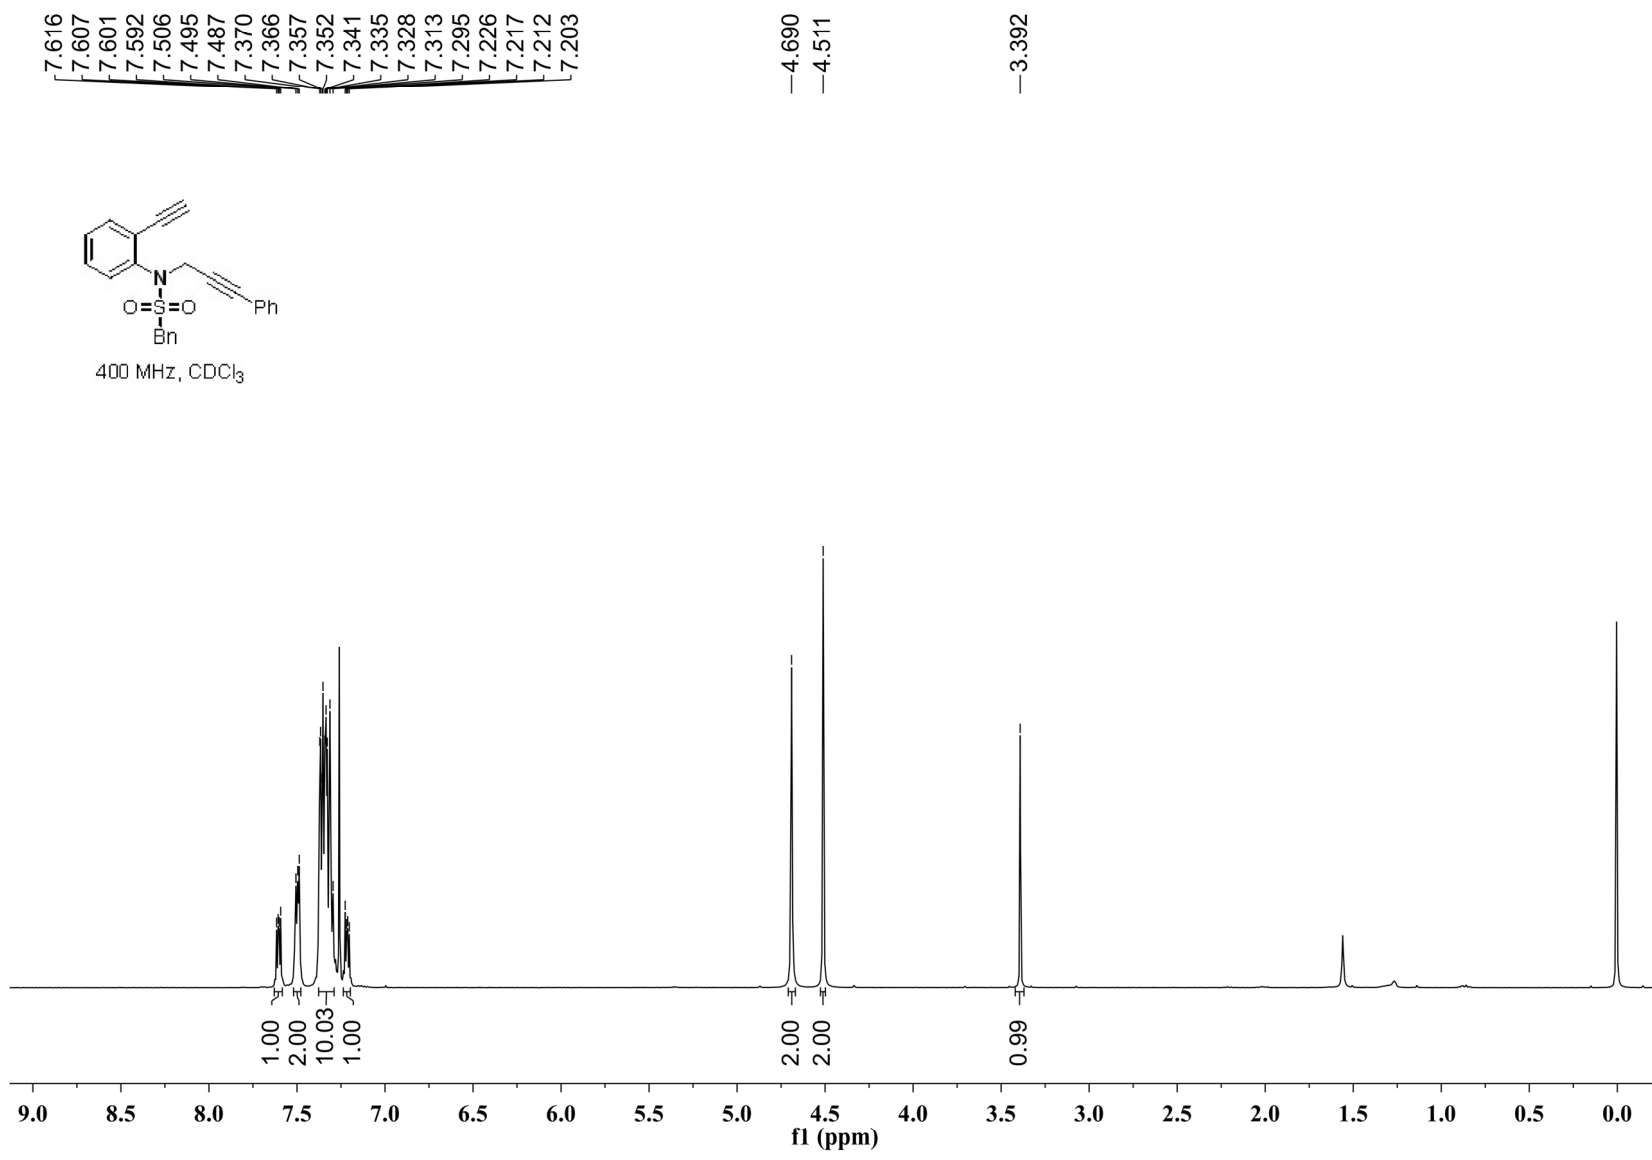

<sup>1</sup>H NMR Spectrum of Compound 1z

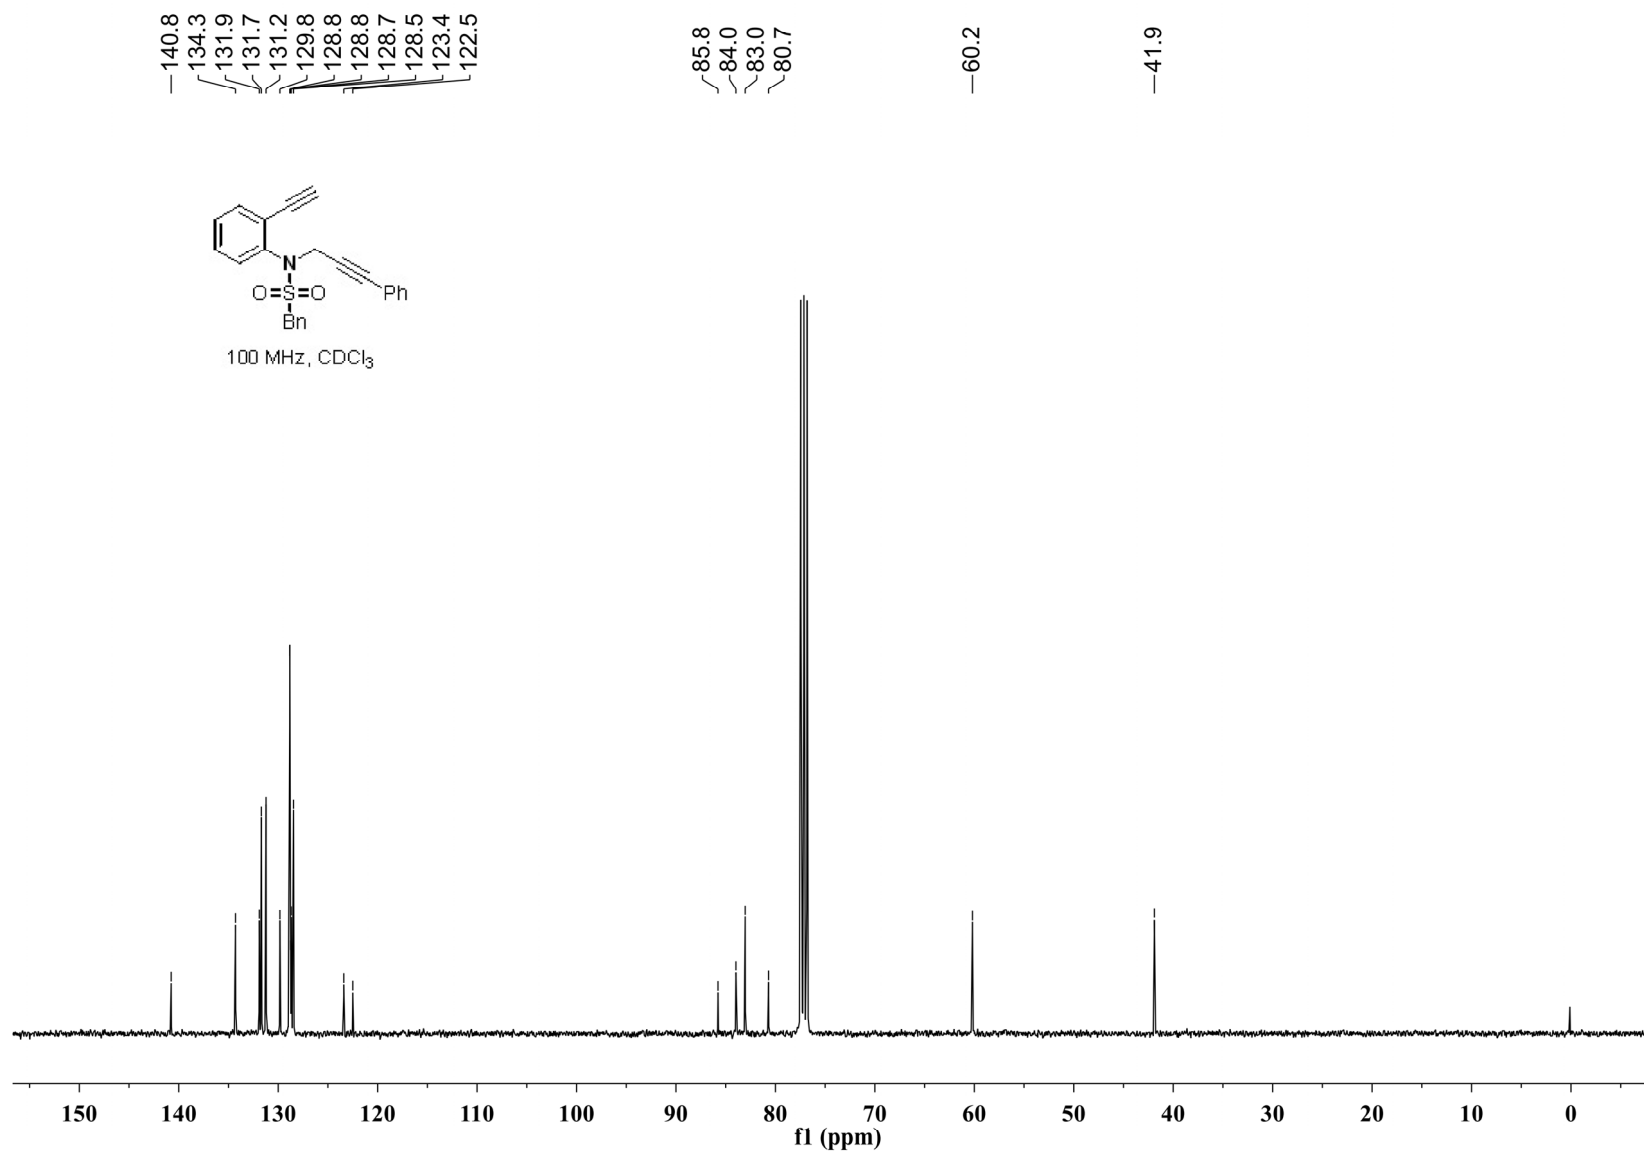

<sup>13</sup>C NMR Spectrum of Compound 1z

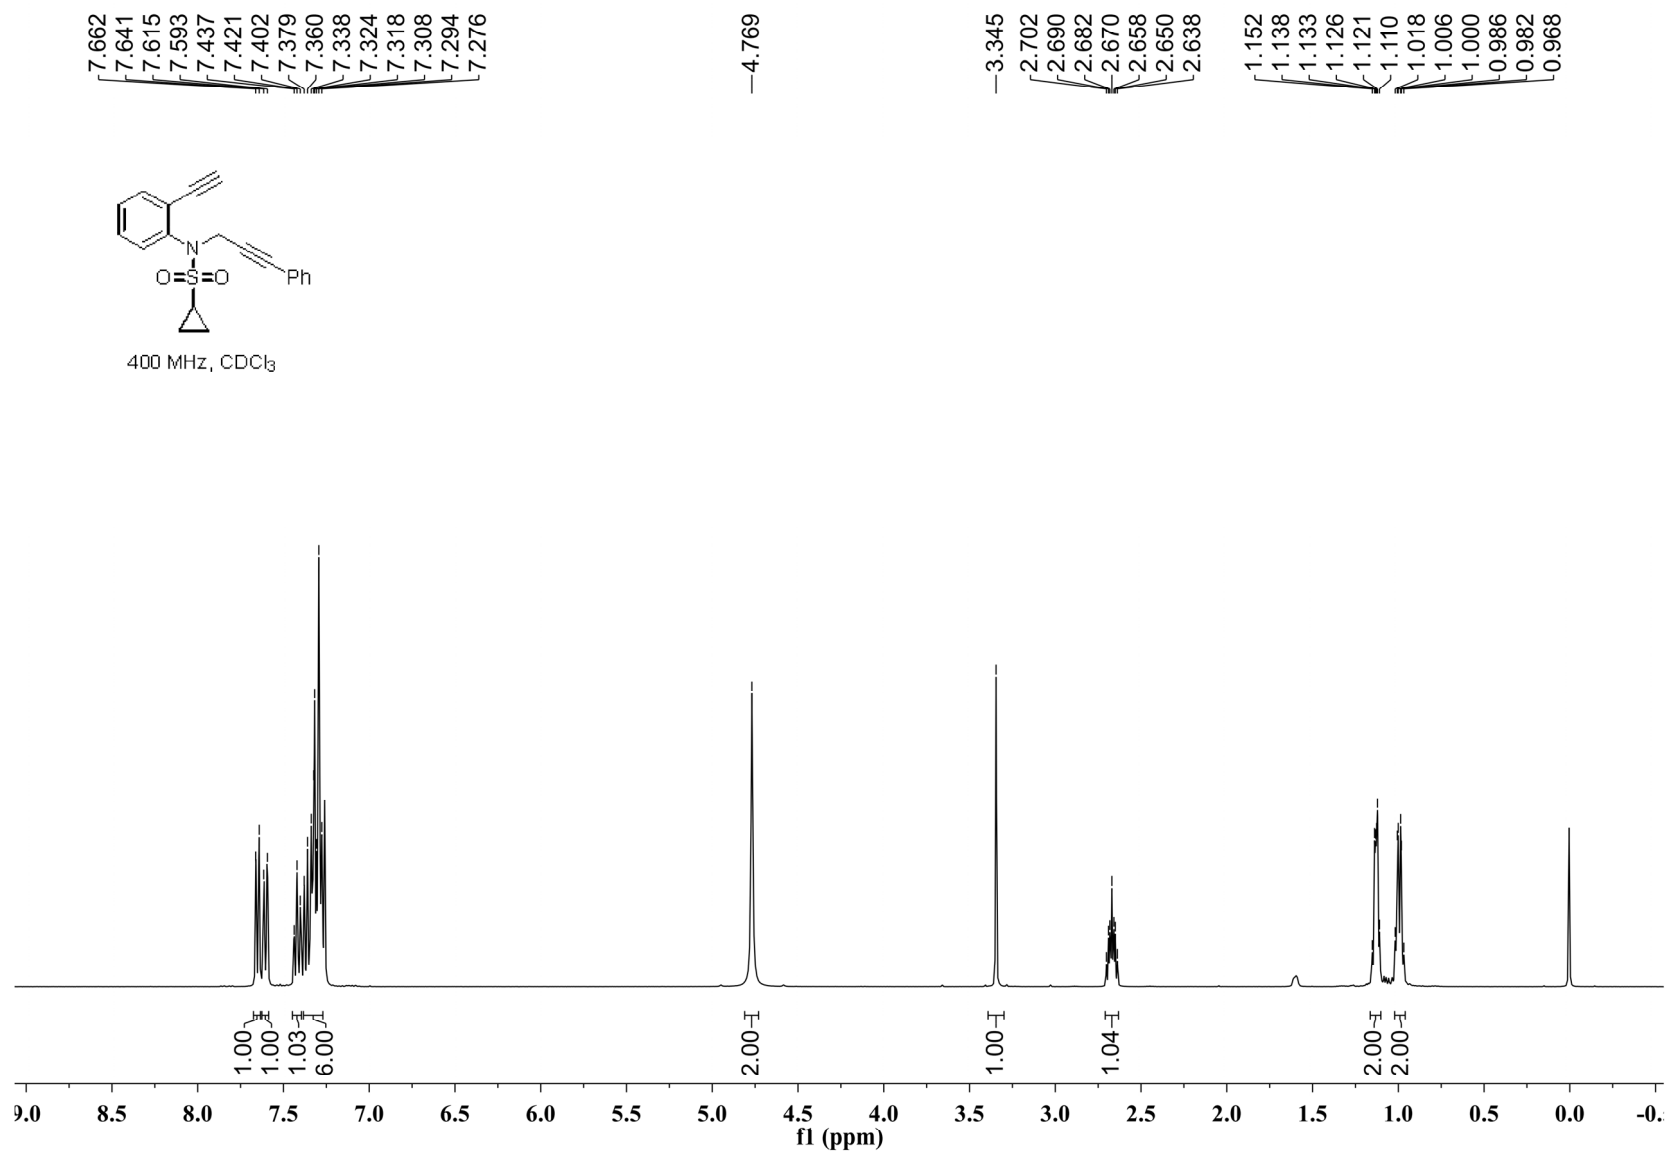

<sup>1</sup>H NMR Spectrum of Compound 1aa

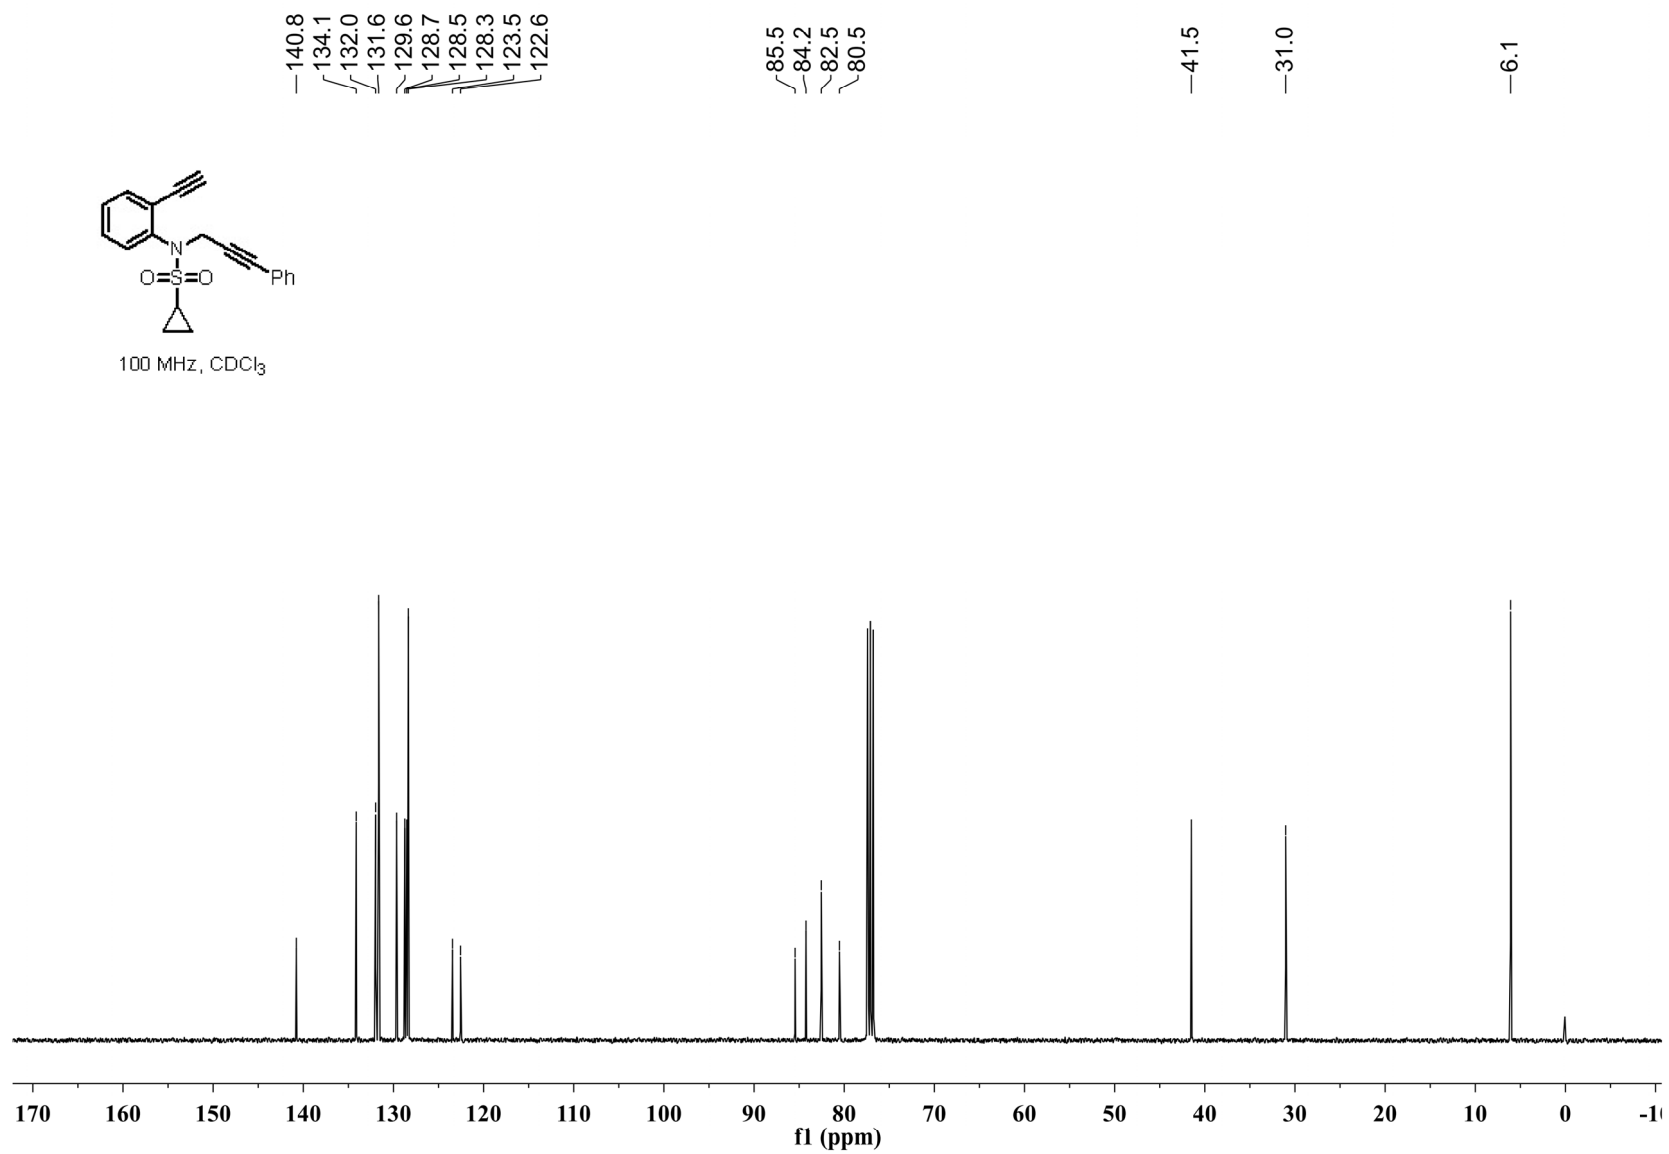

<sup>13</sup>C NMR Spectrum of Compound 1aa

7.629  
7.611  
7.470  
7.445  
7.427  
7.402  
7.396  
7.385  
7.376  
7.358  
7.304  
7.292  
7.285  
7.275  
7.264  
7.249

5.293  
5.249

4.327  
4.284

3.266

2.403  
2.387  
2.371  
2.354  
2.337

1.106  
1.090  
1.040  
1.024

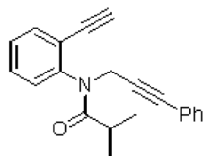

400 MHz, CDCl<sub>3</sub>

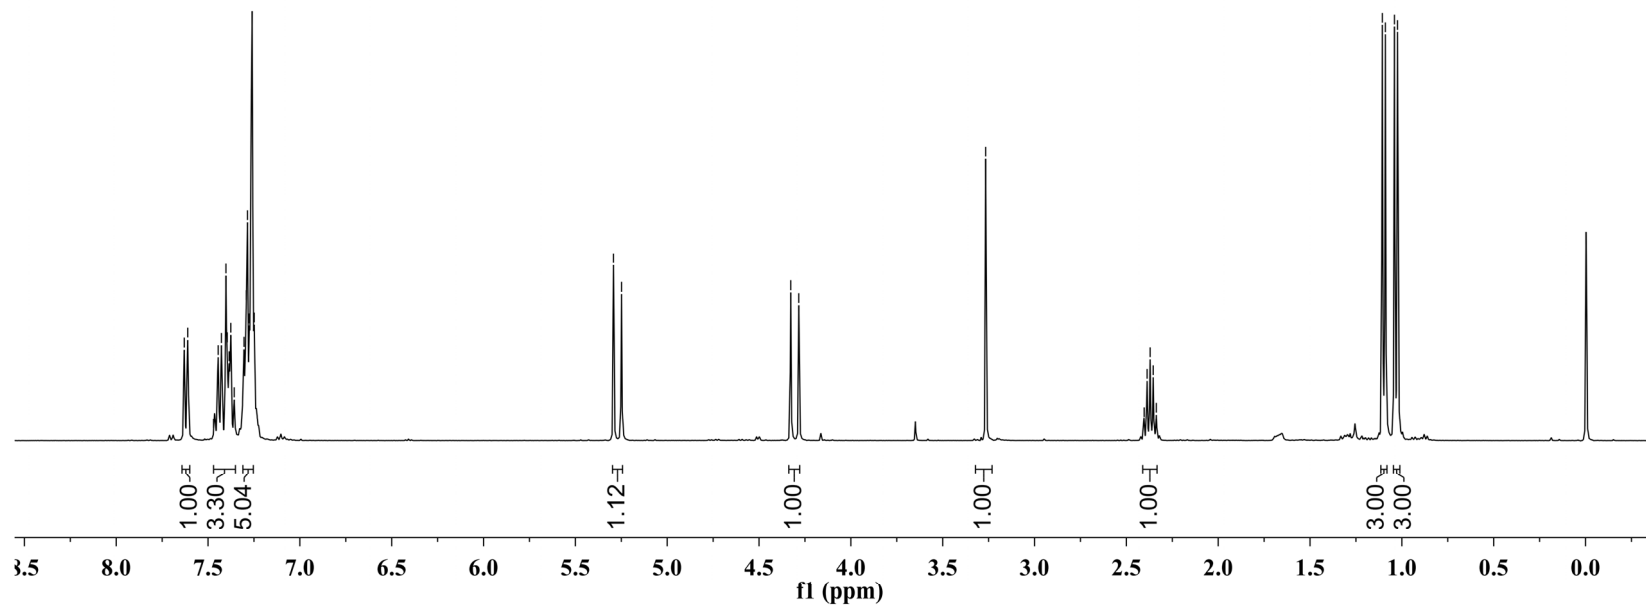

<sup>1</sup>H NMR Spectrum of Compound 1bb

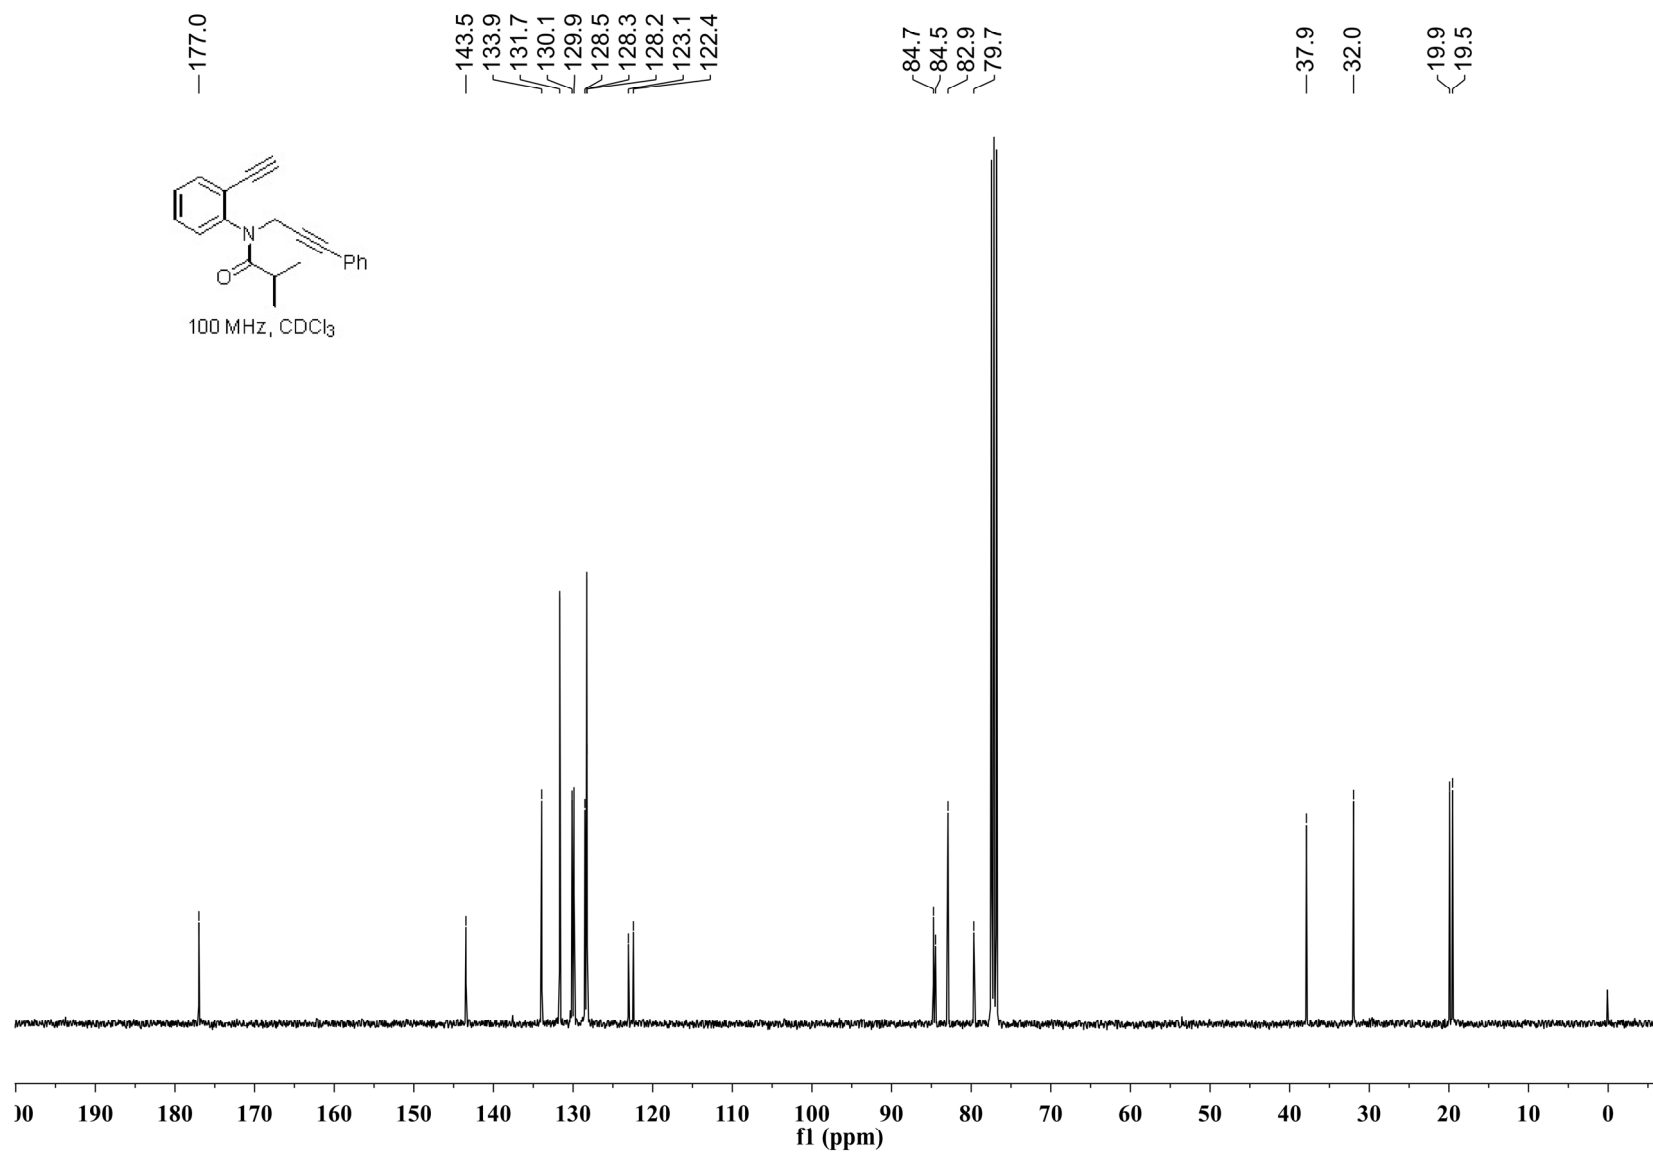

<sup>13</sup>C NMR Spectrum of Compound 1bb

7.638  
7.619  
7.494  
7.475  
7.469  
7.451  
7.428  
7.392  
7.373  
7.355  
7.320  
7.316  
7.304  
7.297  
7.272  
7.265  
7.260  
7.248

5.288  
5.245

4.383  
4.339

3.266

1.273  
1.262  
1.254  
1.242  
1.231  
1.222  
1.211  
1.077  
1.071  
1.061  
1.050  
1.041  
1.033

0.691  
0.682  
0.671  
0.644  
0.635  
0.614

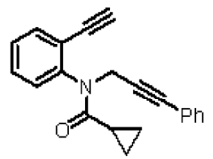

400 MHz, CDCl<sub>3</sub>

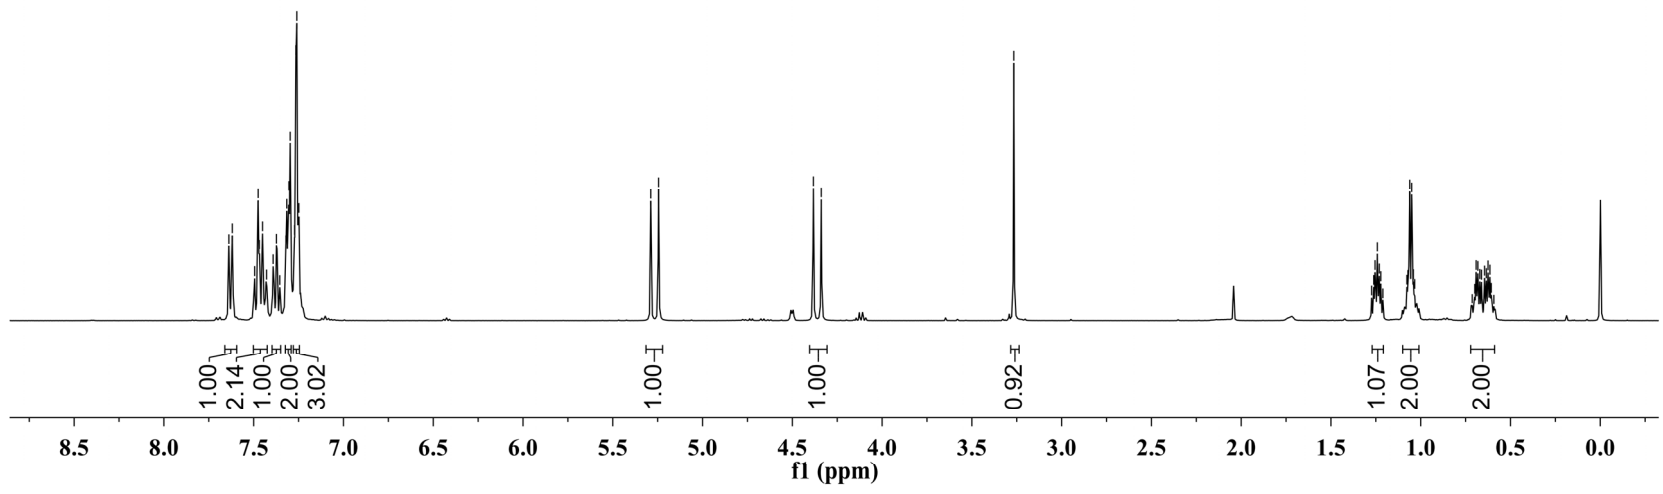

<sup>1</sup>H NMR Spectrum of Compound 1cc

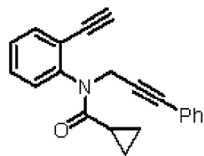

100 MHz, CDCl<sub>3</sub>

—173.3

—143.5  
133.9  
131.7  
130.5  
129.9  
128.4  
128.4  
128.3  
128.2  
123.1  
122.7

84.7  
84.4  
82.8  
79.7

—38.1

12.8  
9.1  
8.6

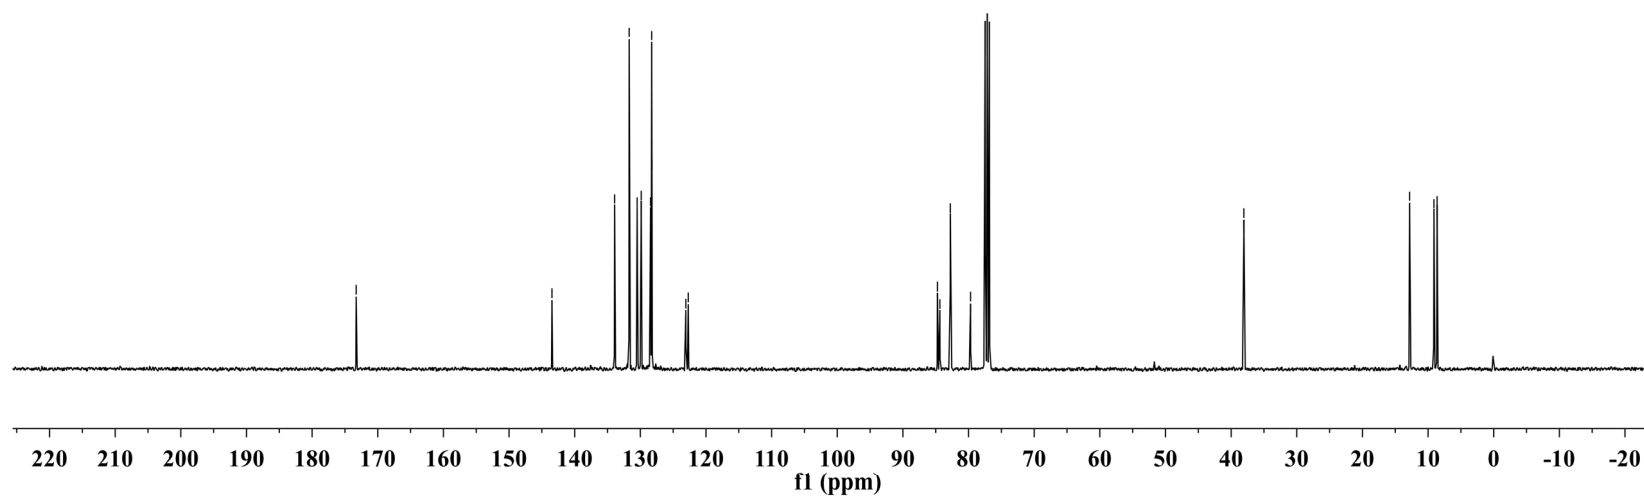

<sup>13</sup>C NMR Spectrum of Compound 1cc



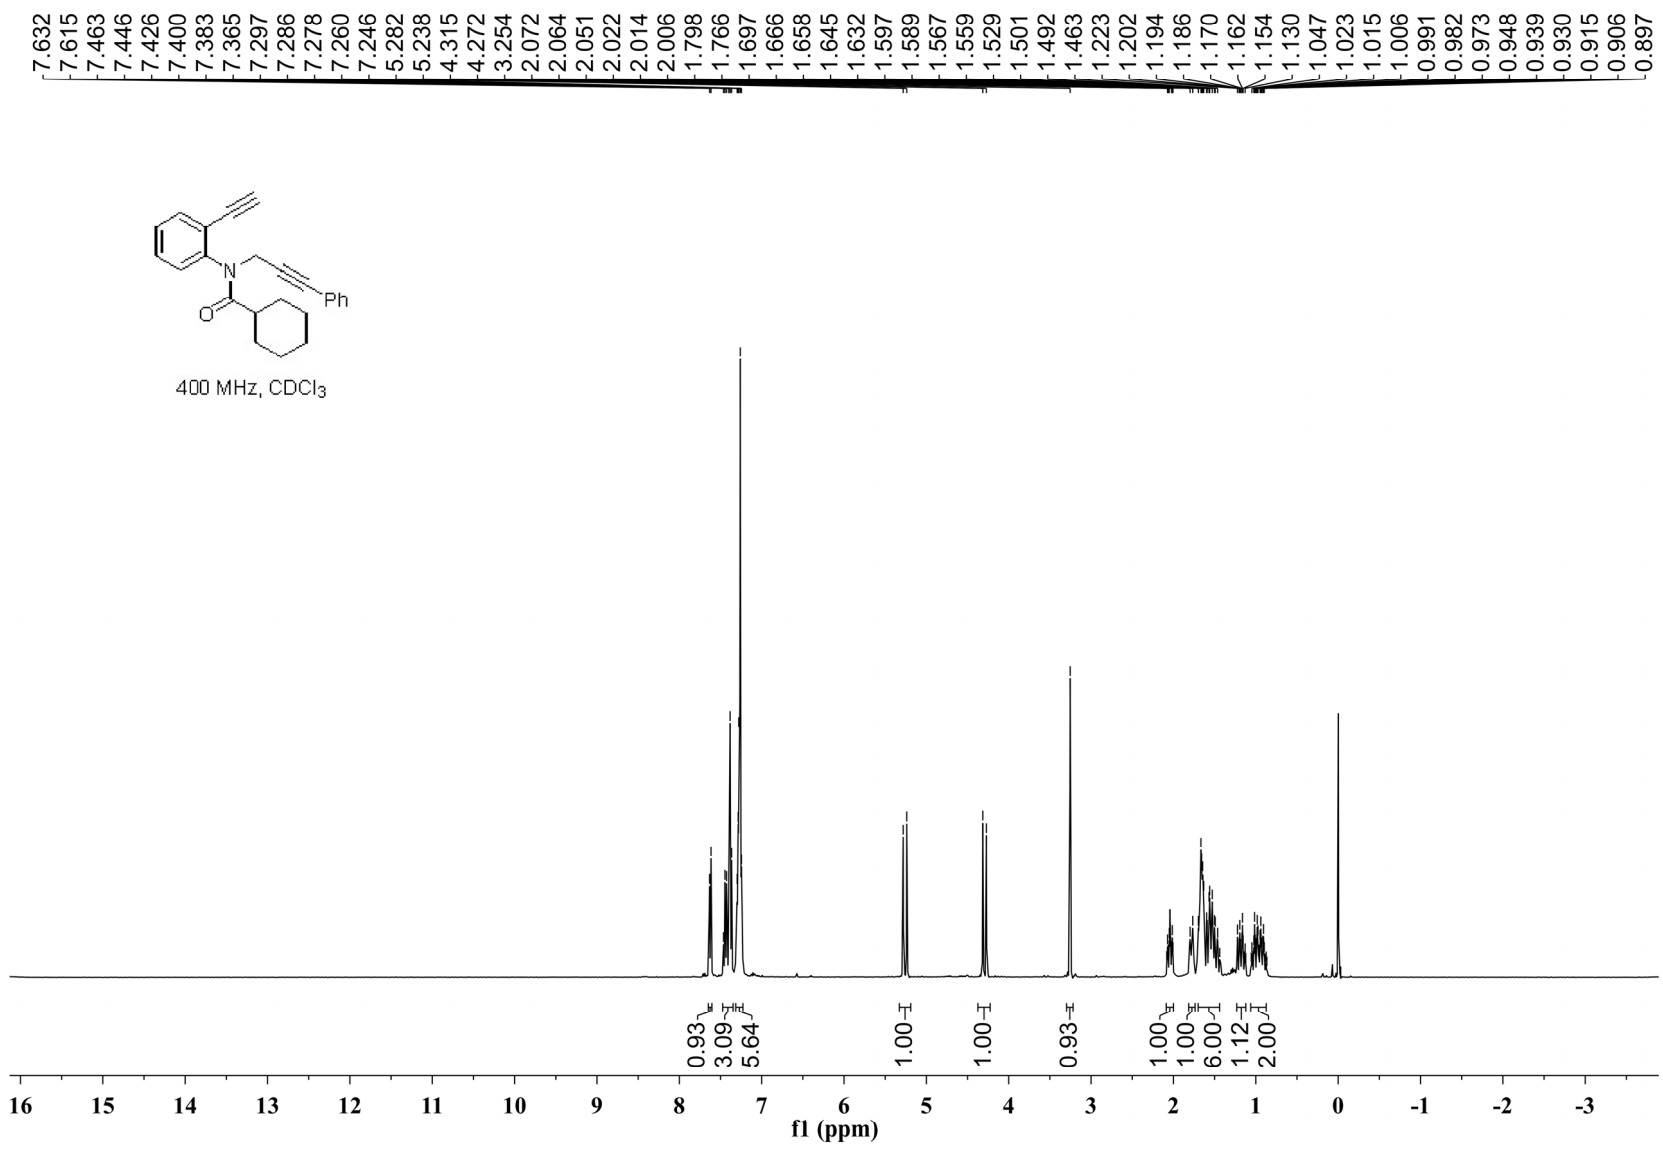

<sup>1</sup>H NMR Spectrum of Compound 1dd

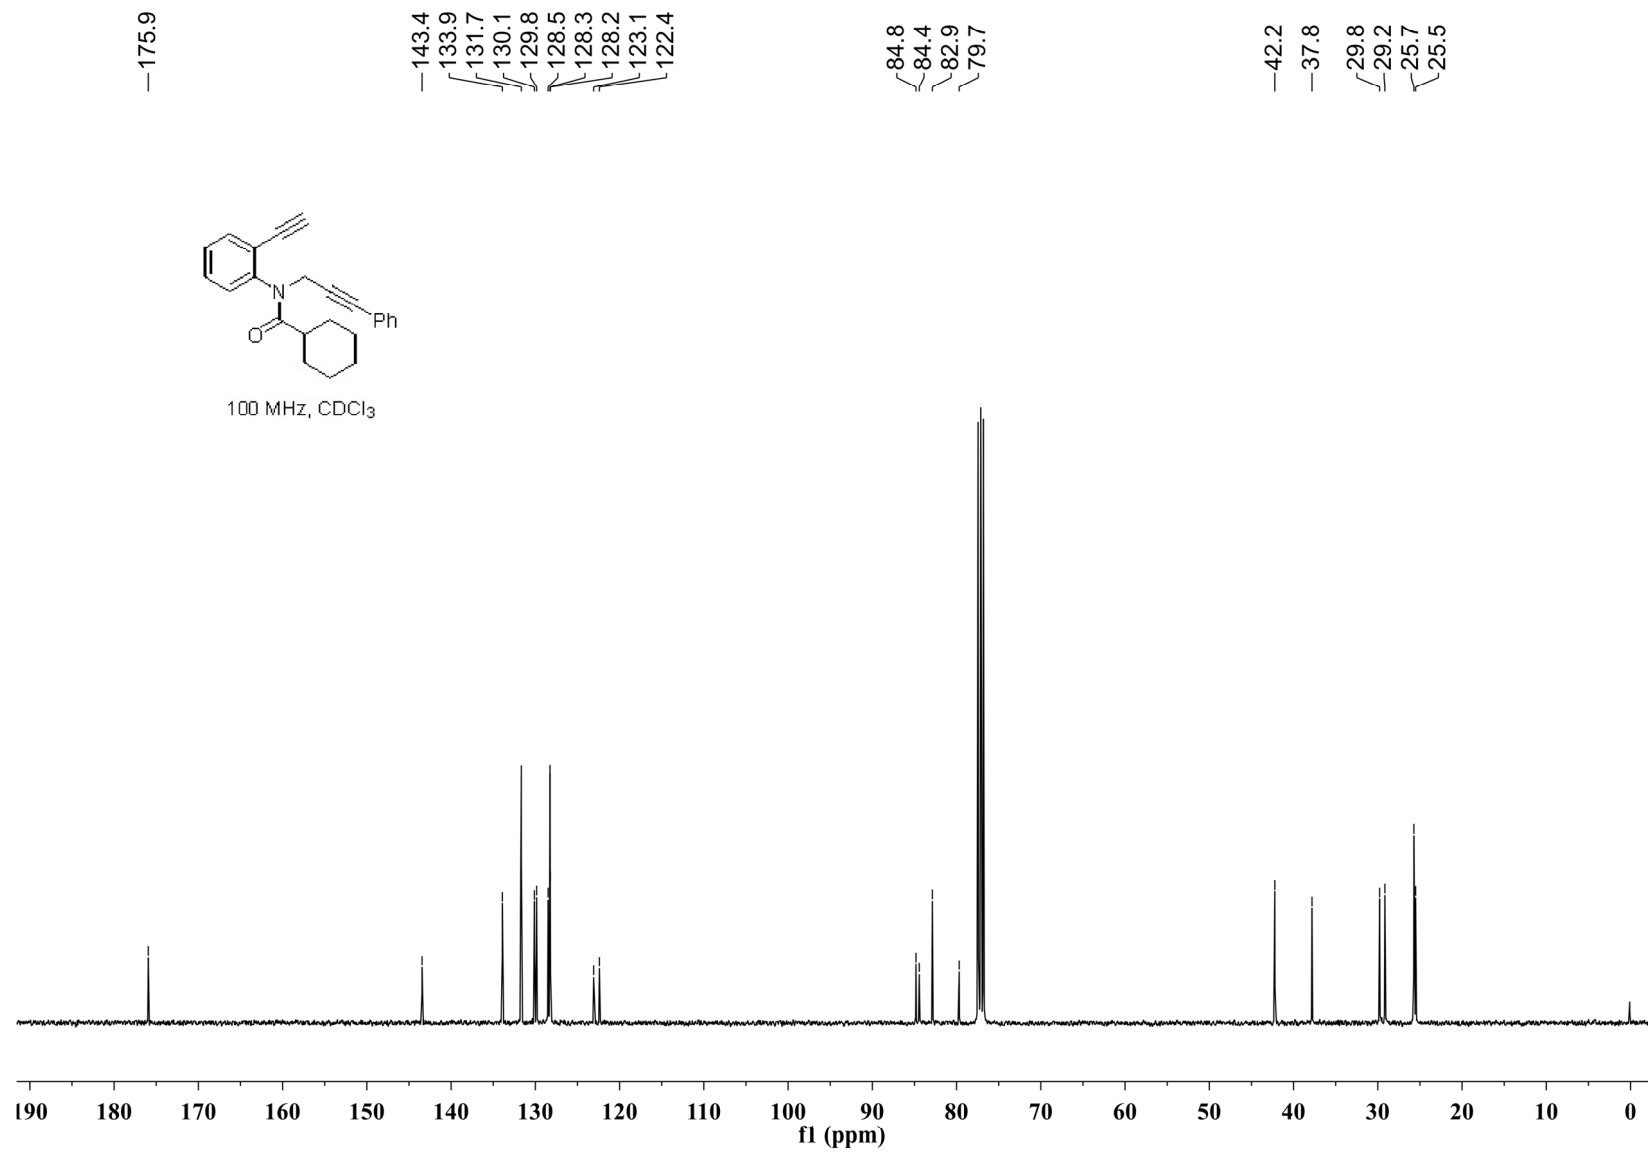

<sup>13</sup>C NMR Spectrum of Compound 1dd

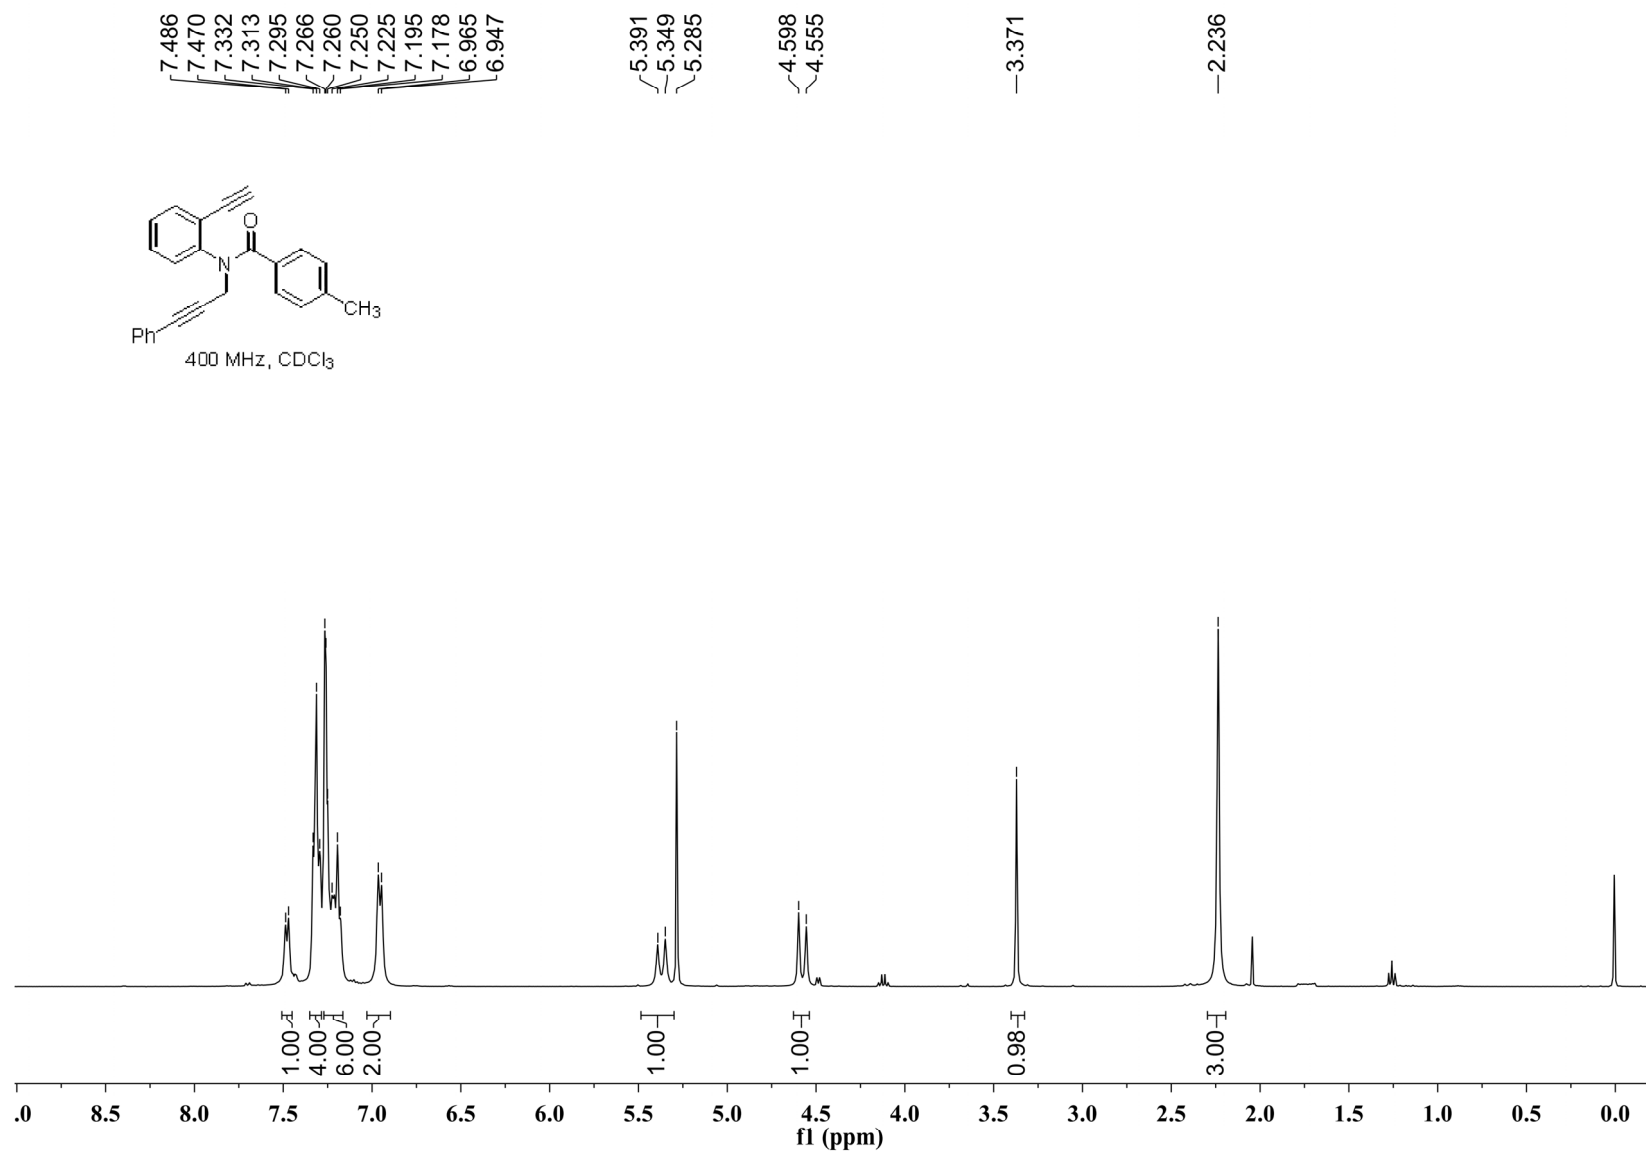

<sup>1</sup>H NMR Spectrum of Compound 1ee

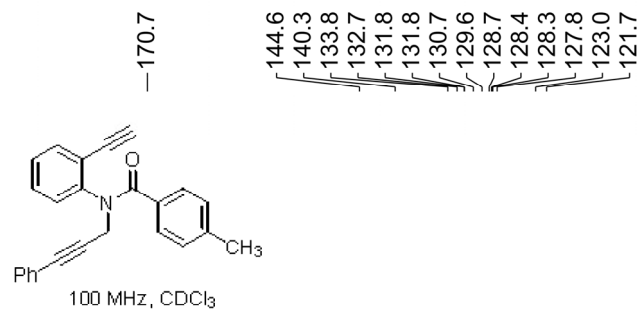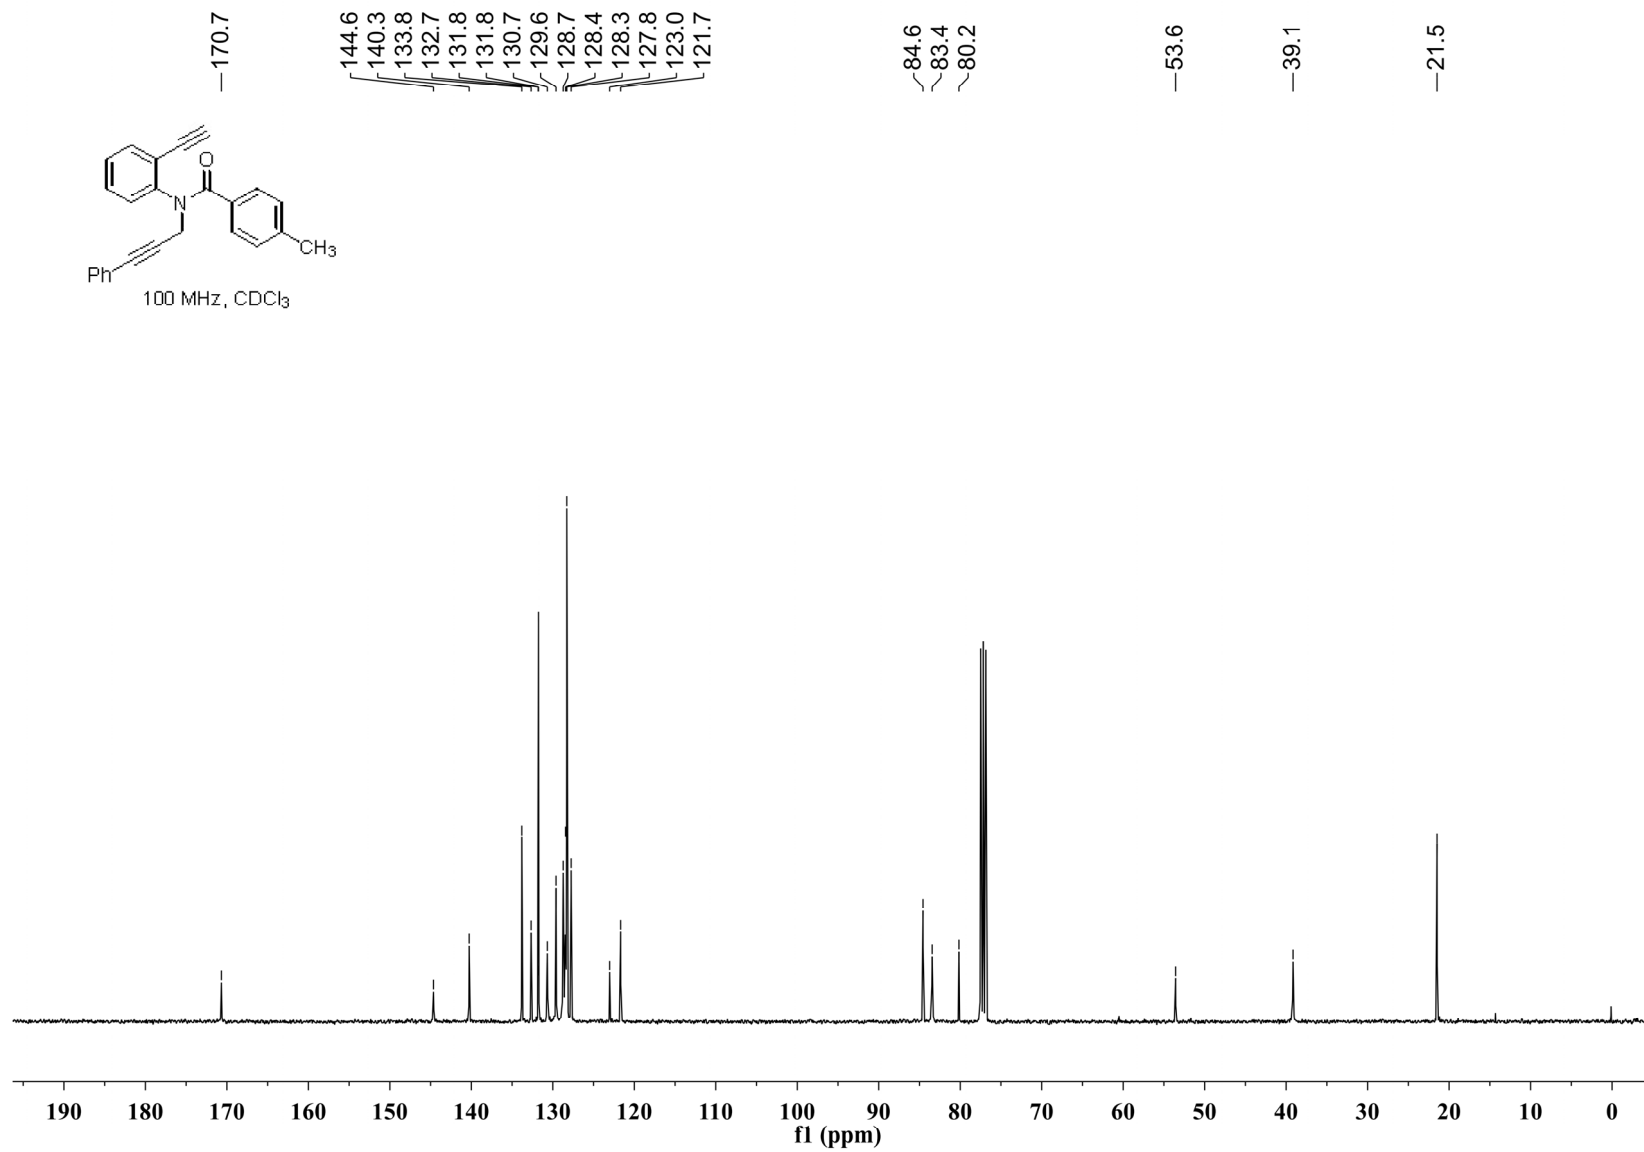

<sup>13</sup>C NMR Spectrum of Compound 1ee

7.985  
7.964  
7.782  
7.762  
7.610  
7.601  
7.596  
7.587  
7.393  
7.384  
7.379  
7.370  
7.338  
7.326  
7.315  
7.307  
7.288

4.999  
4.988  
4.972  
4.961  
4.945  
4.934  
4.821

3.157  
2.471  
2.168  
2.140  
1.991  
1.968  
1.956  
1.951  
1.795  
1.766  
1.664  
1.619  
1.610  
1.588  
1.560  
1.190  
1.180  
1.150  
1.122  
1.094  
0.986  
0.970  
0.953  
0.841  
0.824

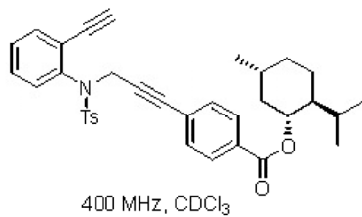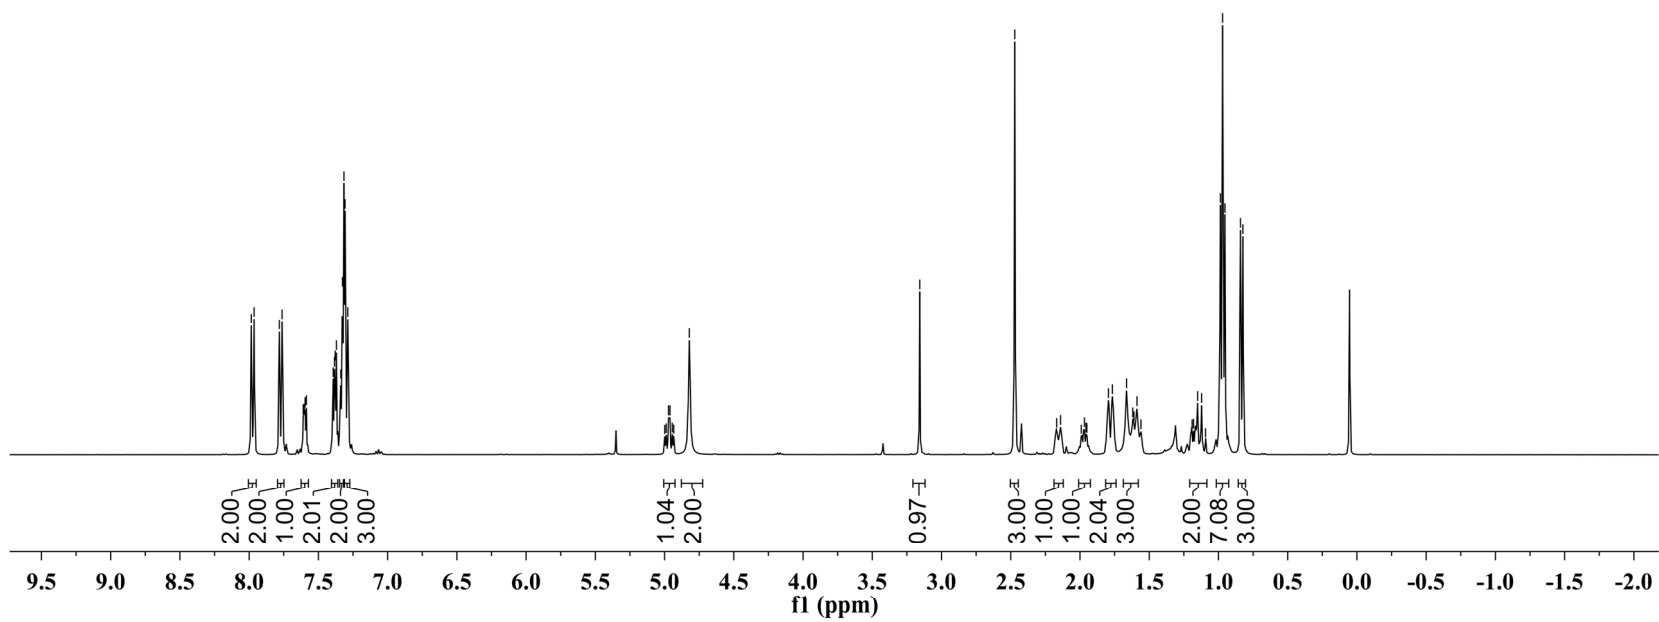

<sup>1</sup>H NMR Spectrum of Compound 1ff

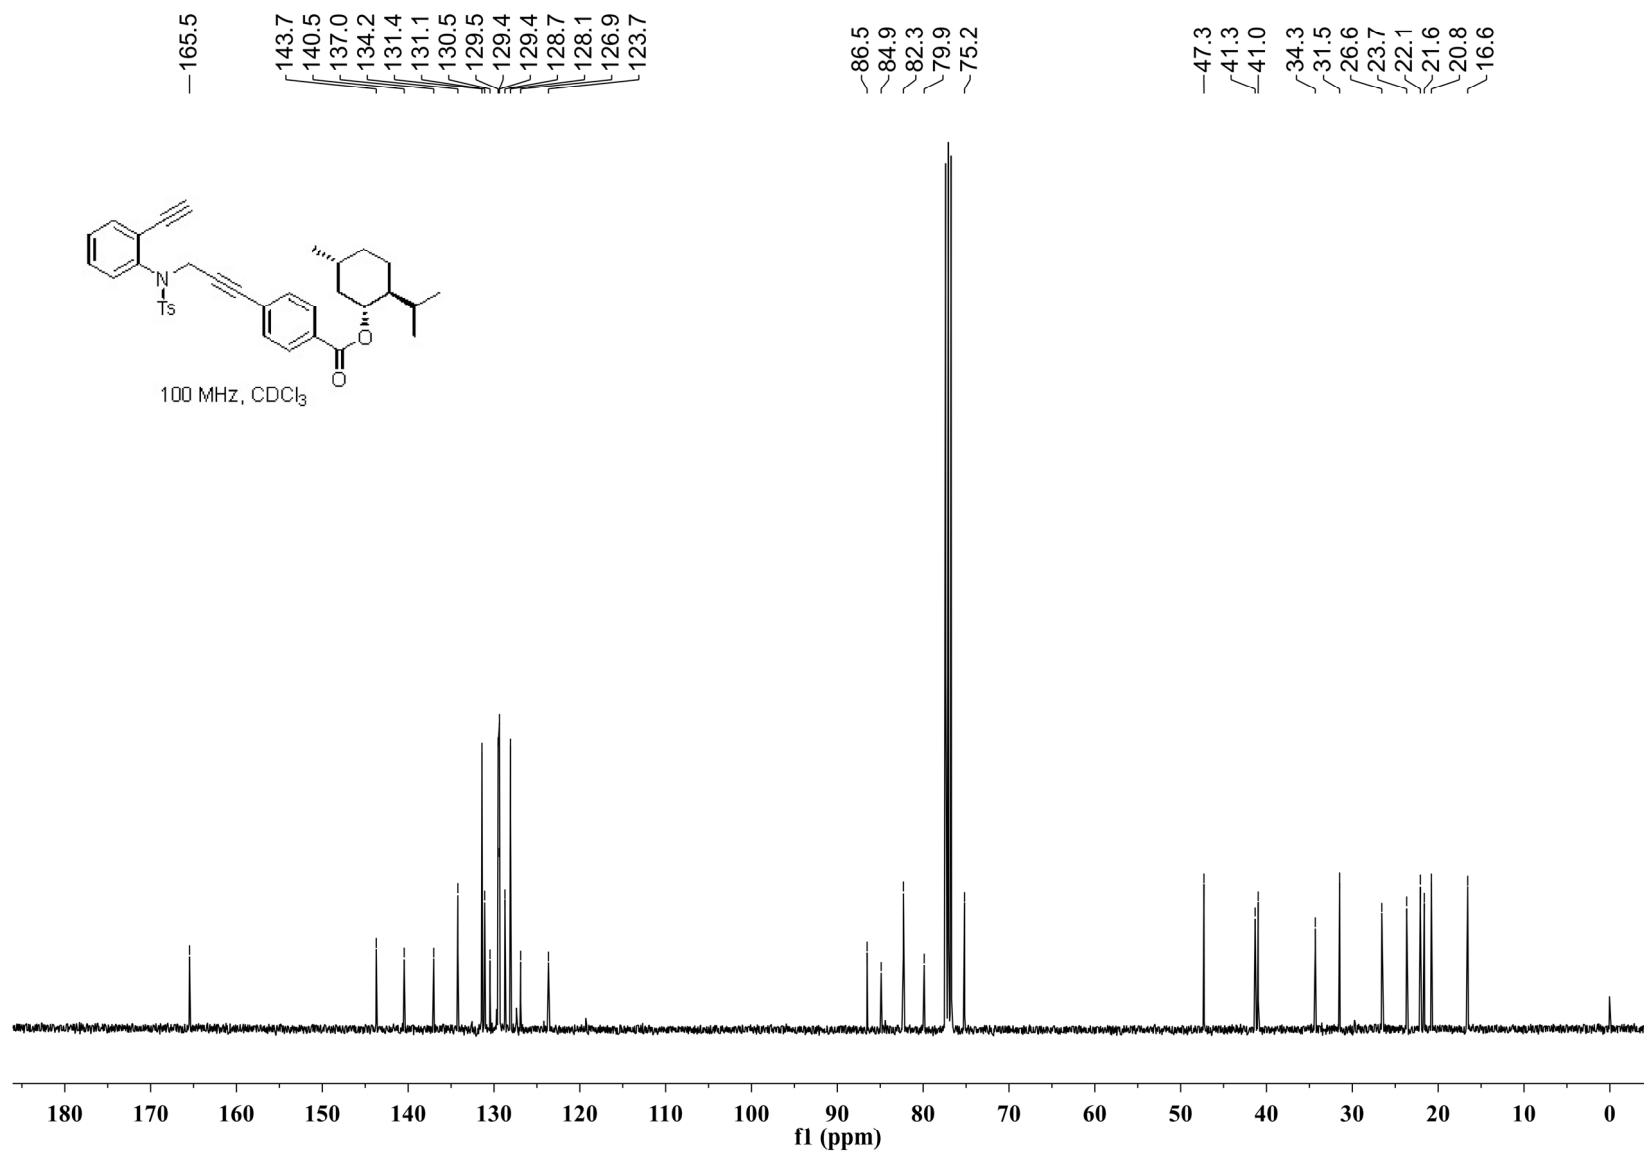

<sup>13</sup>C NMR Spectrum of Compound 1ff

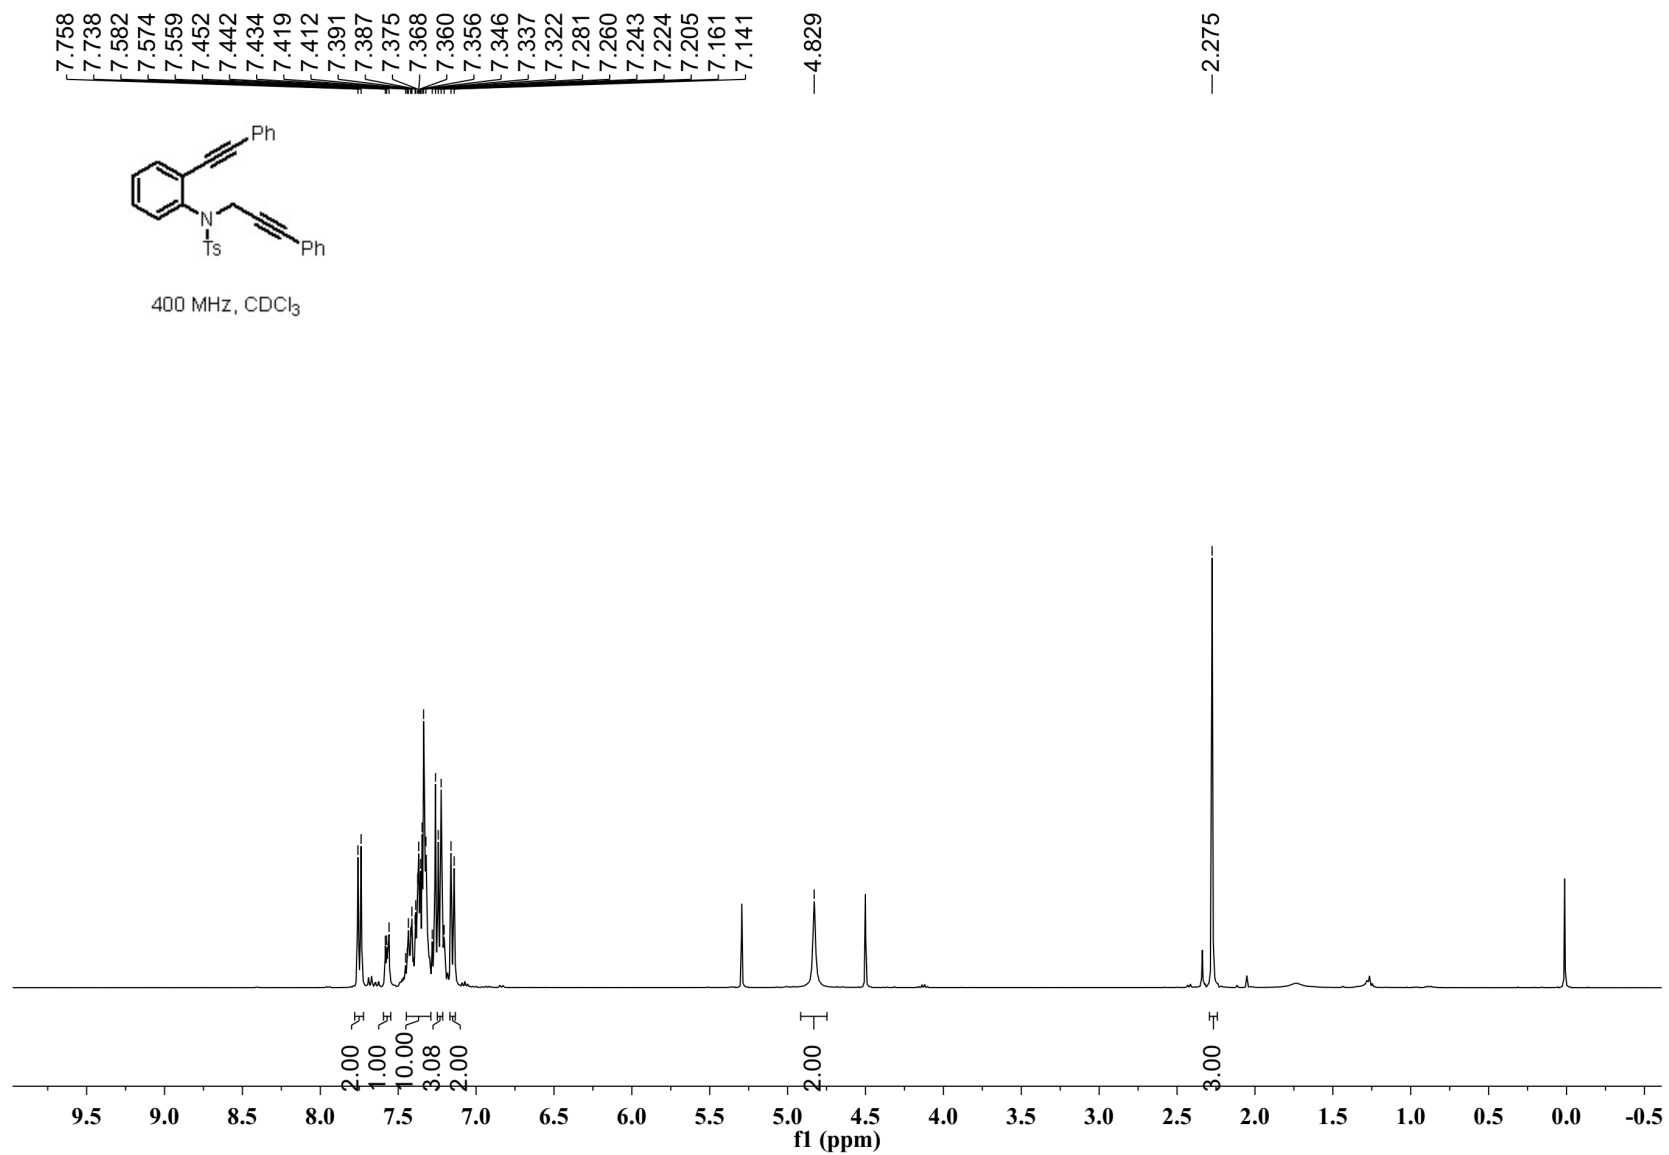

<sup>1</sup>H NMR Spectrum of Compound 1gg

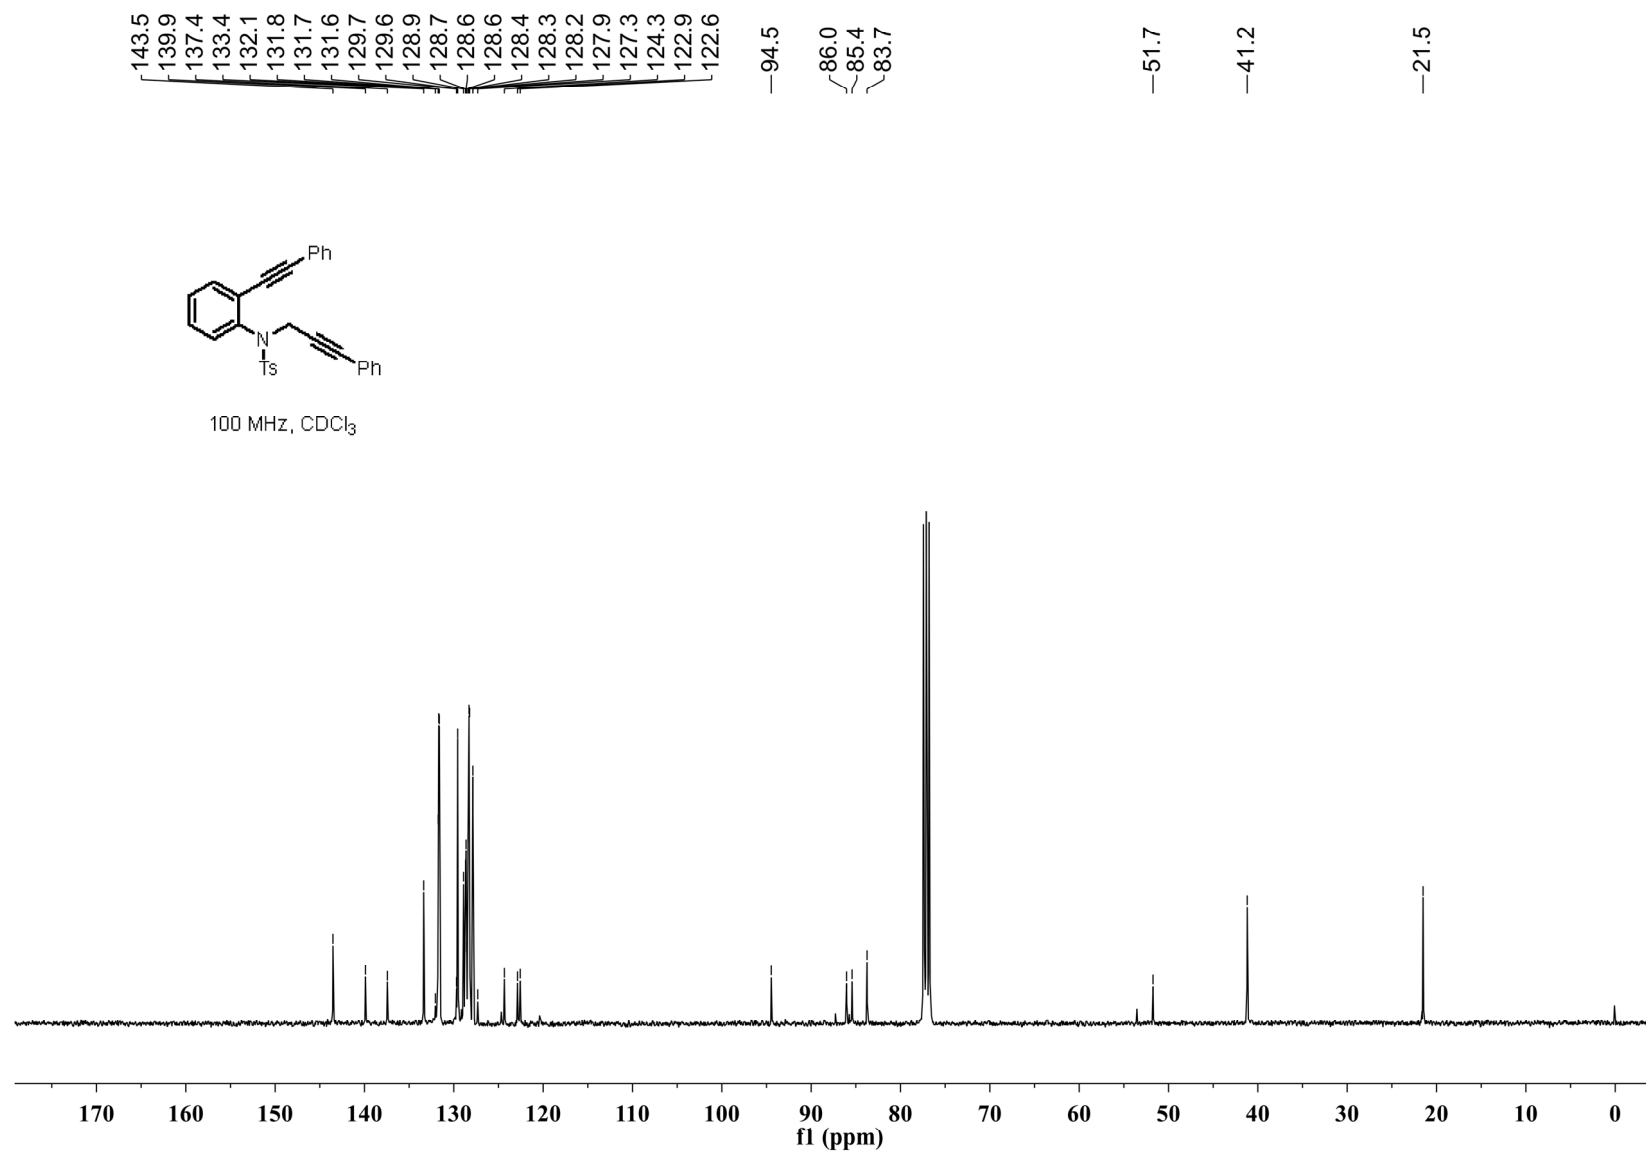

<sup>13</sup>C NMR Spectrum of Compound 1gg



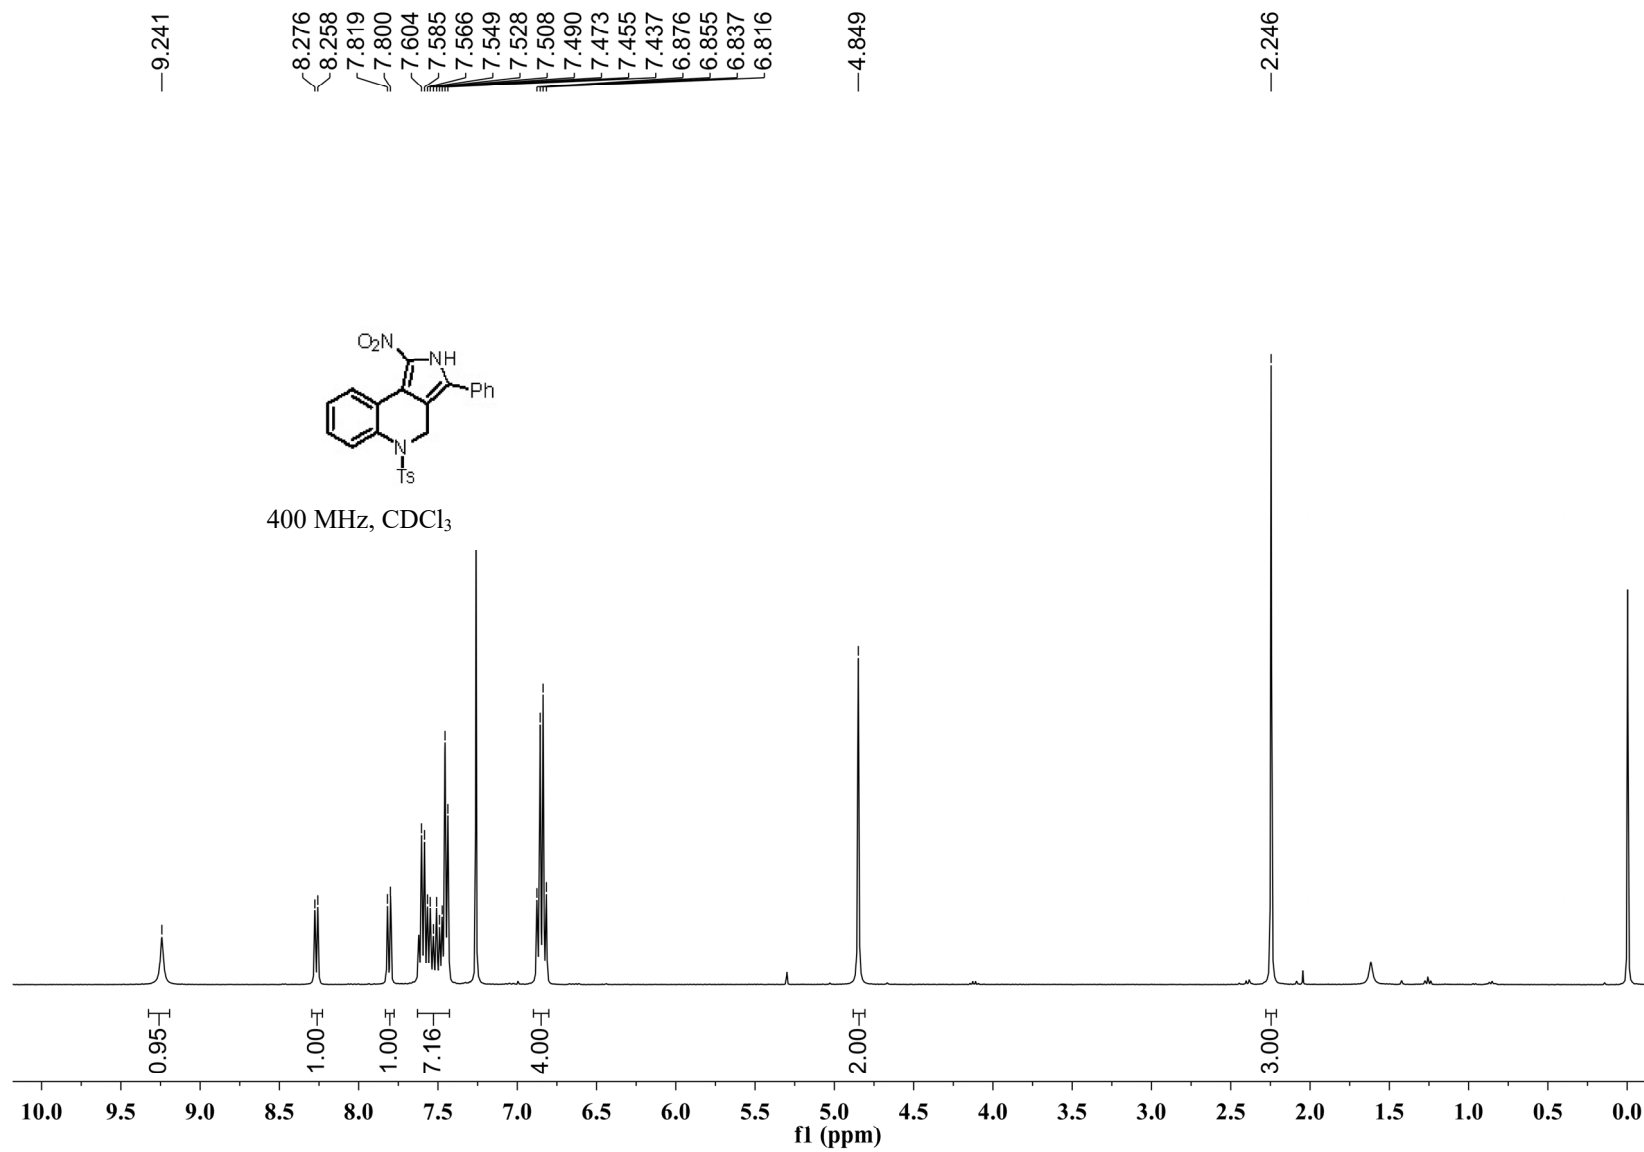

<sup>1</sup>H NMR Spectrum of Compound 3a

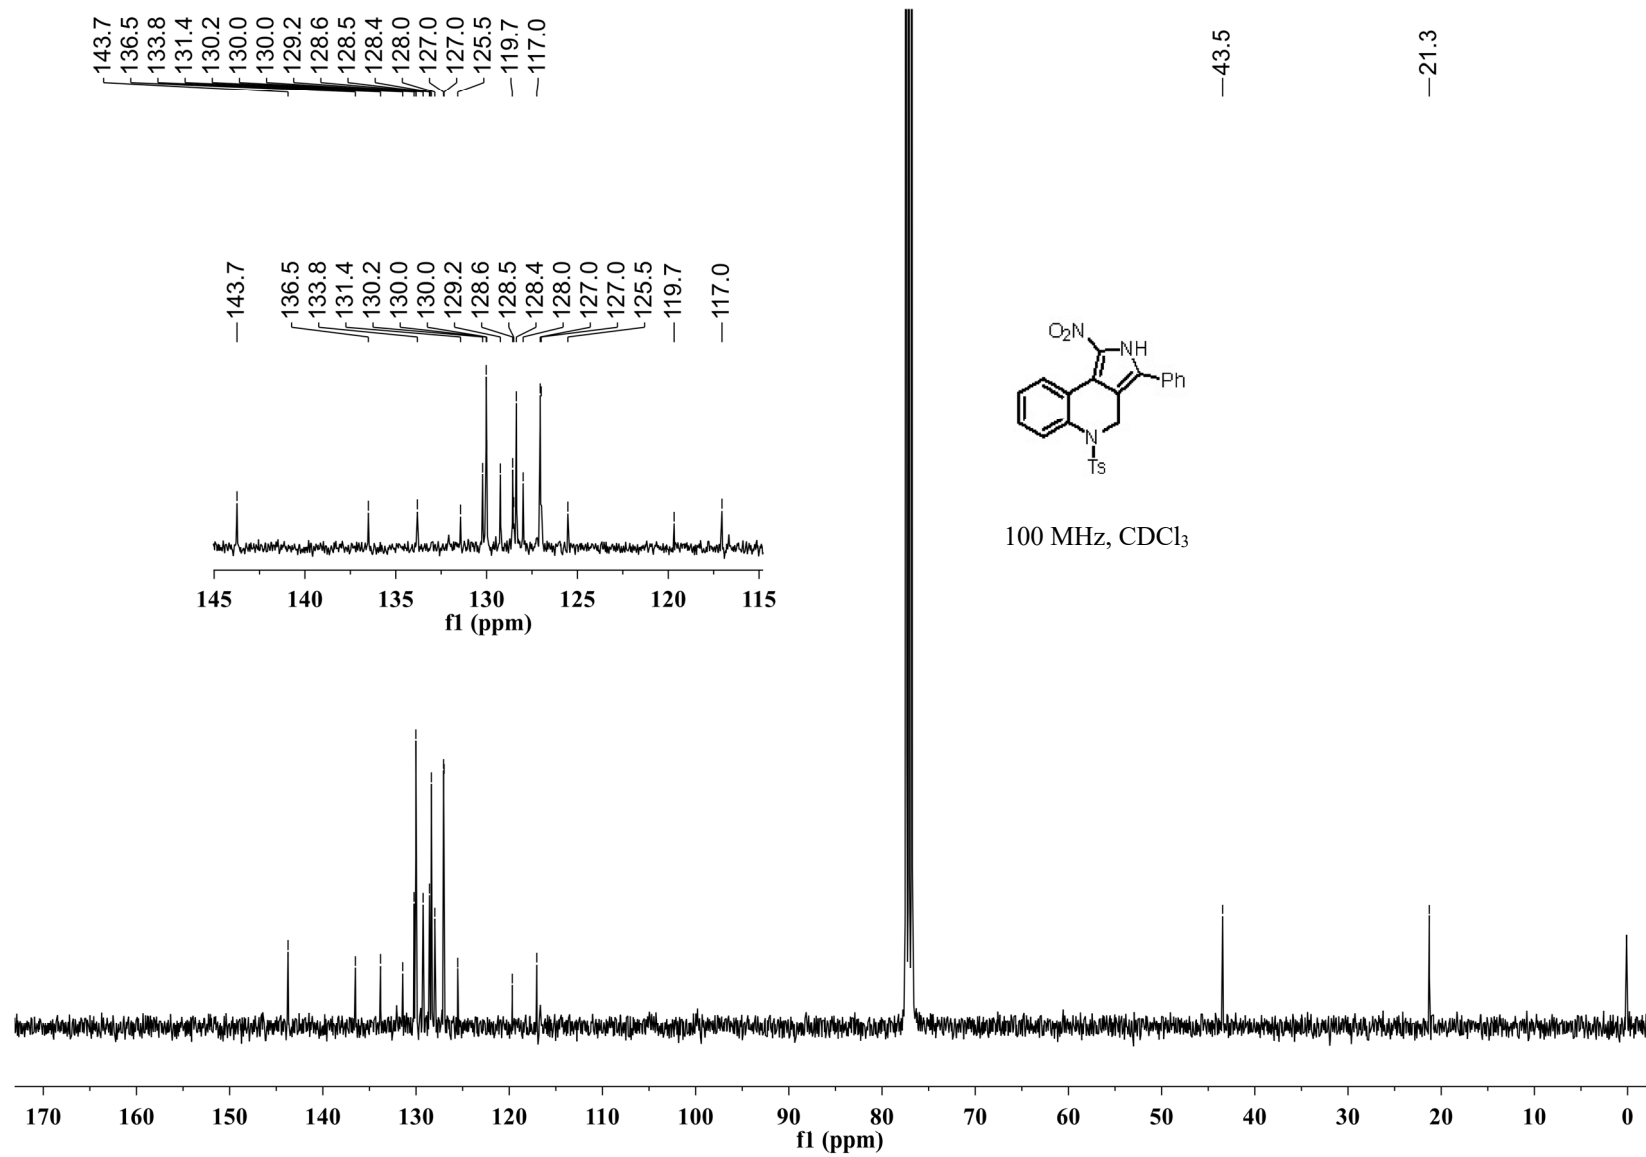

<sup>1</sup>H NMR Spectrum of Compound 3a

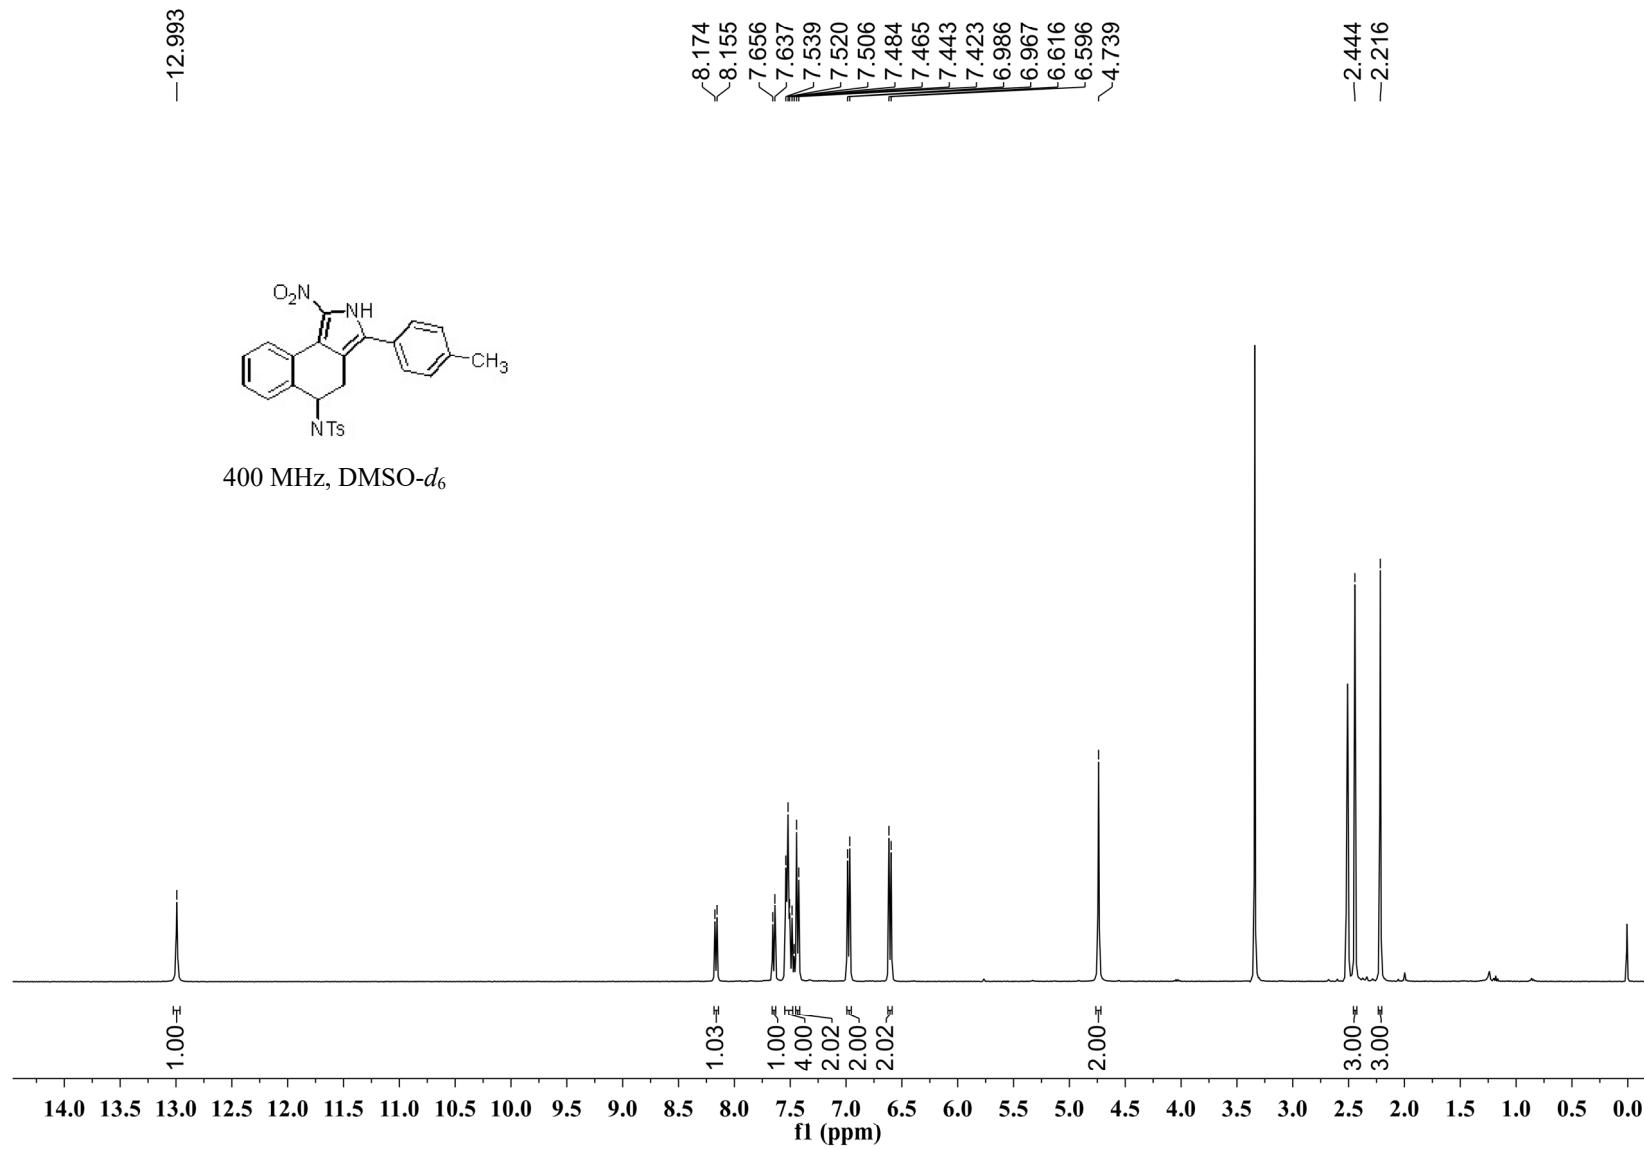

**<sup>1</sup>H NMR Spectrum of Compound 3b**

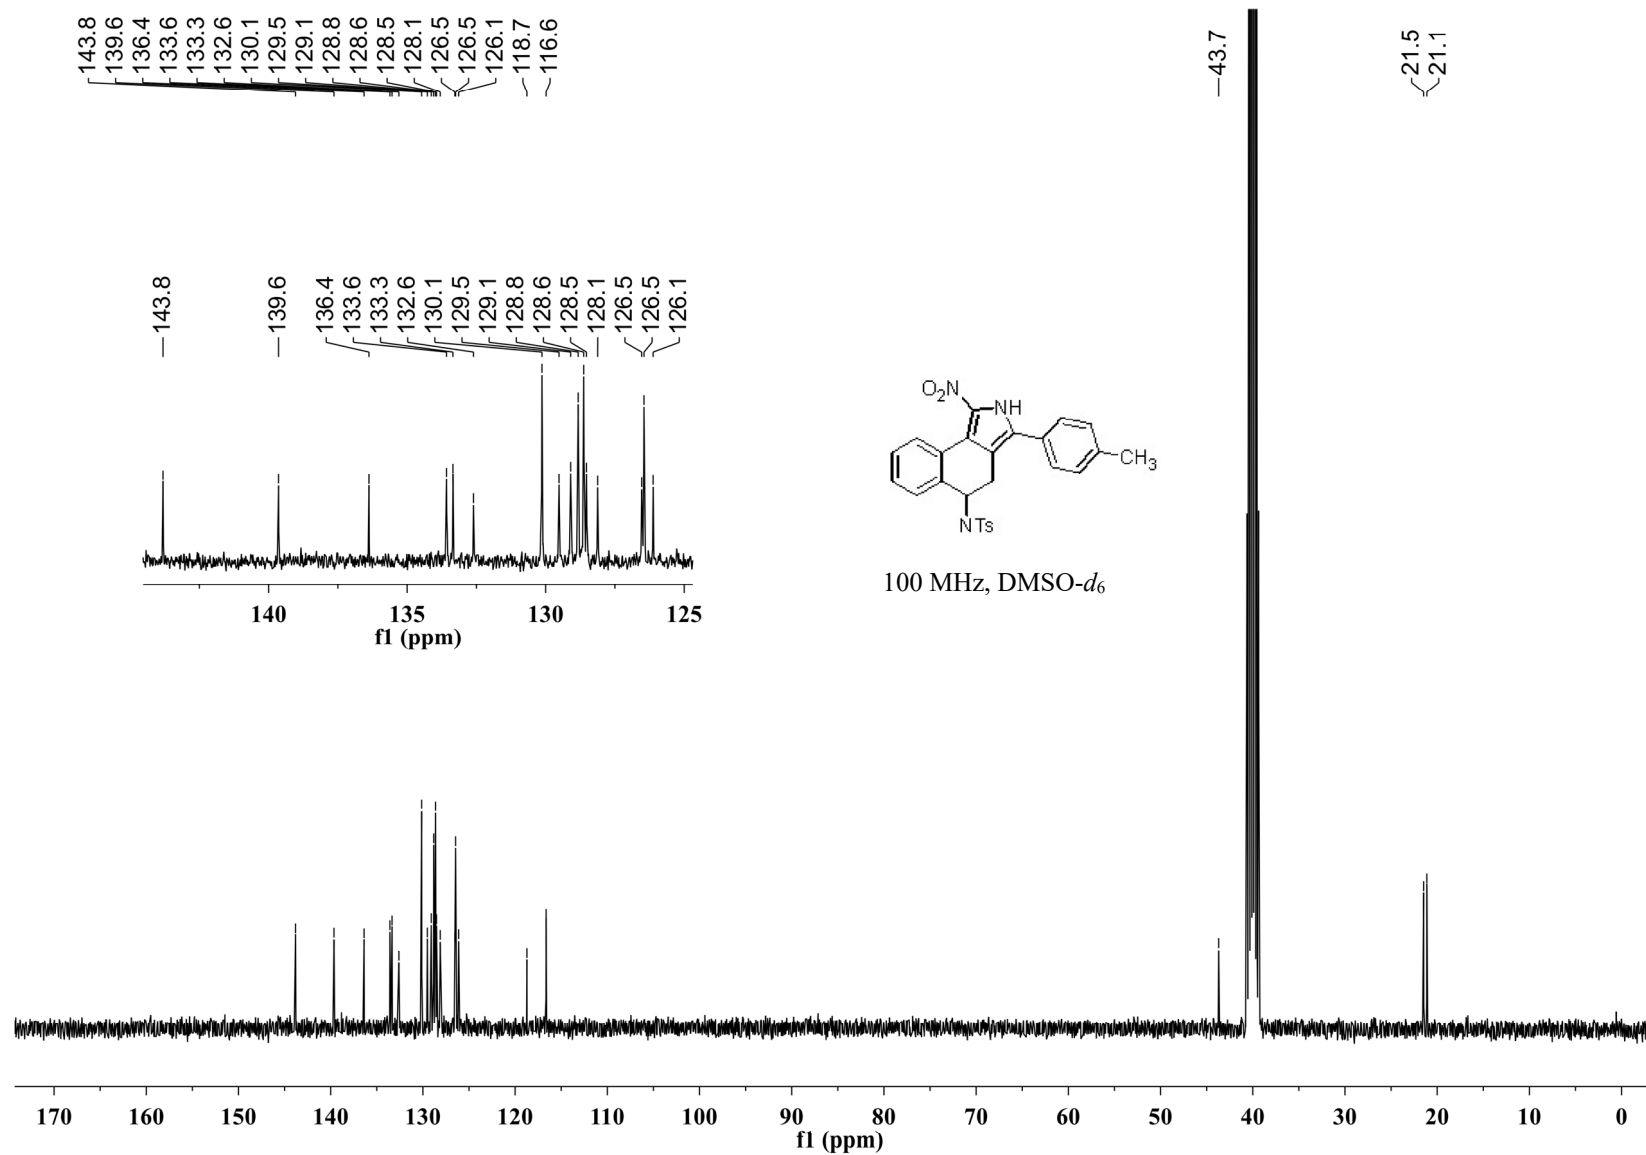

<sup>13</sup>C NMR Spectrum of Compound 3b

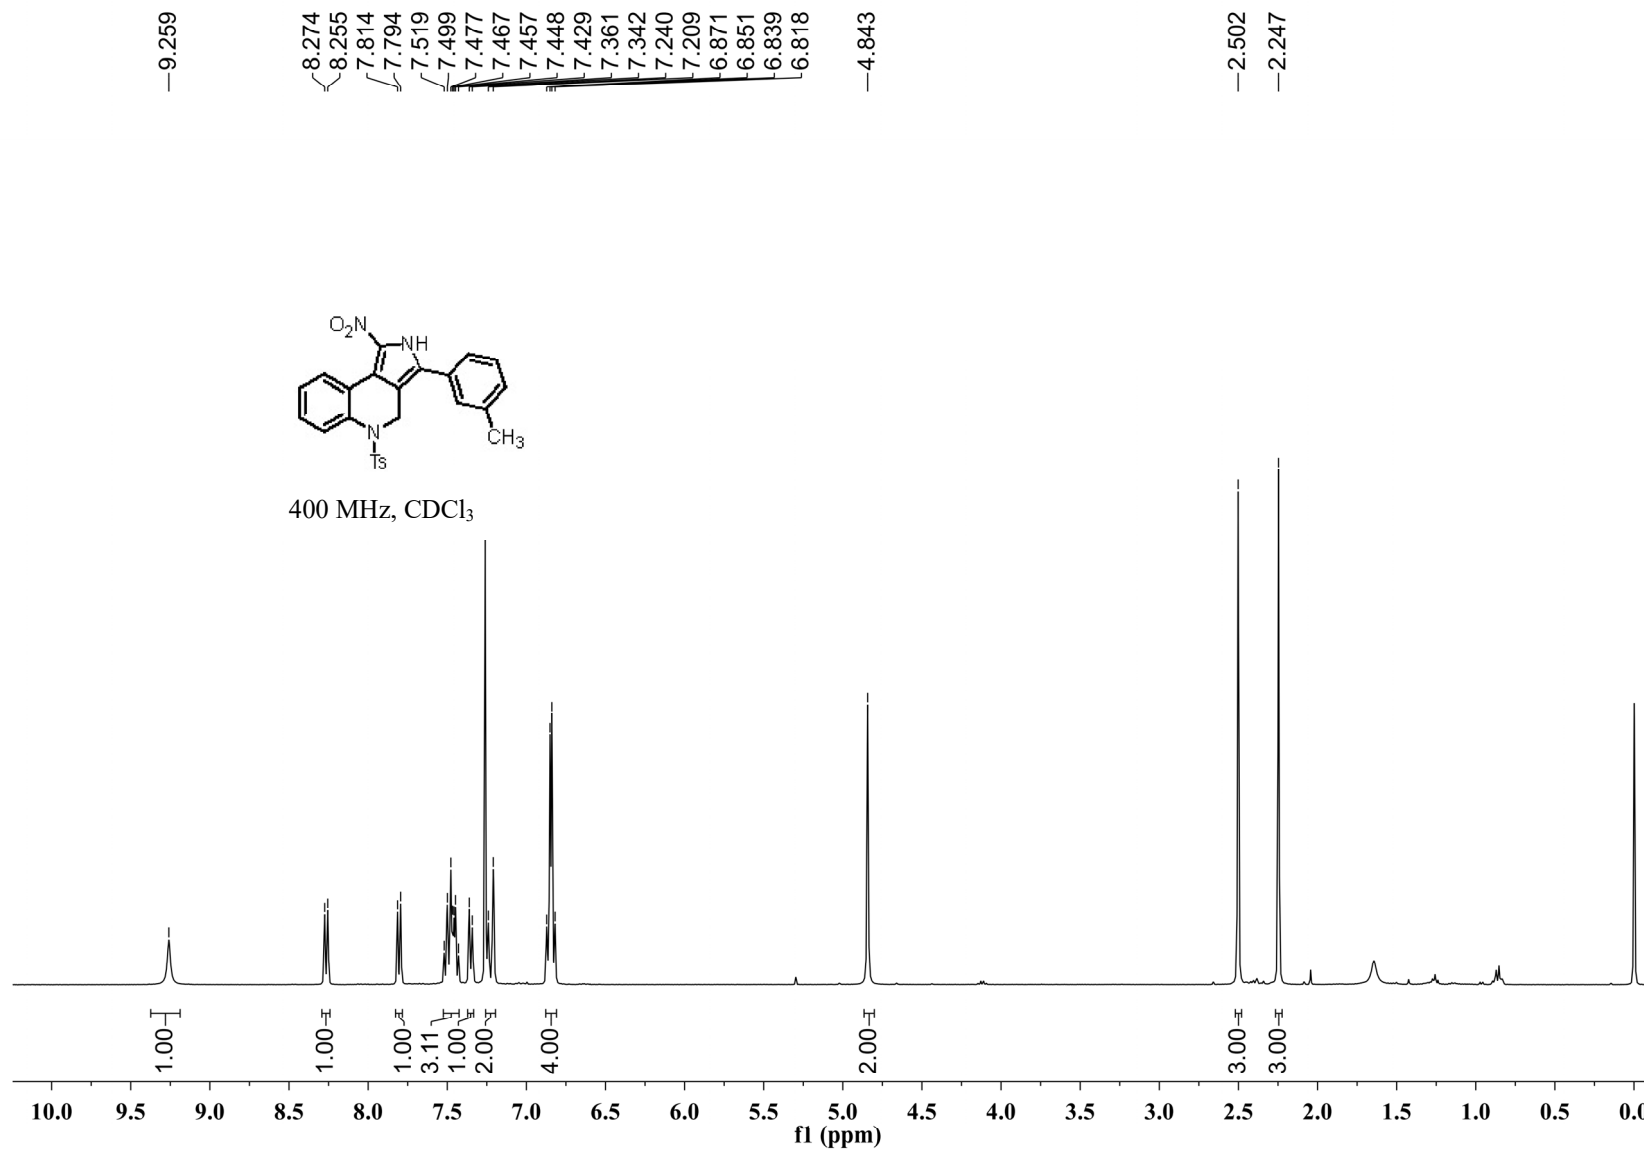

<sup>1</sup>H NMR Spectrum of Compound 3c

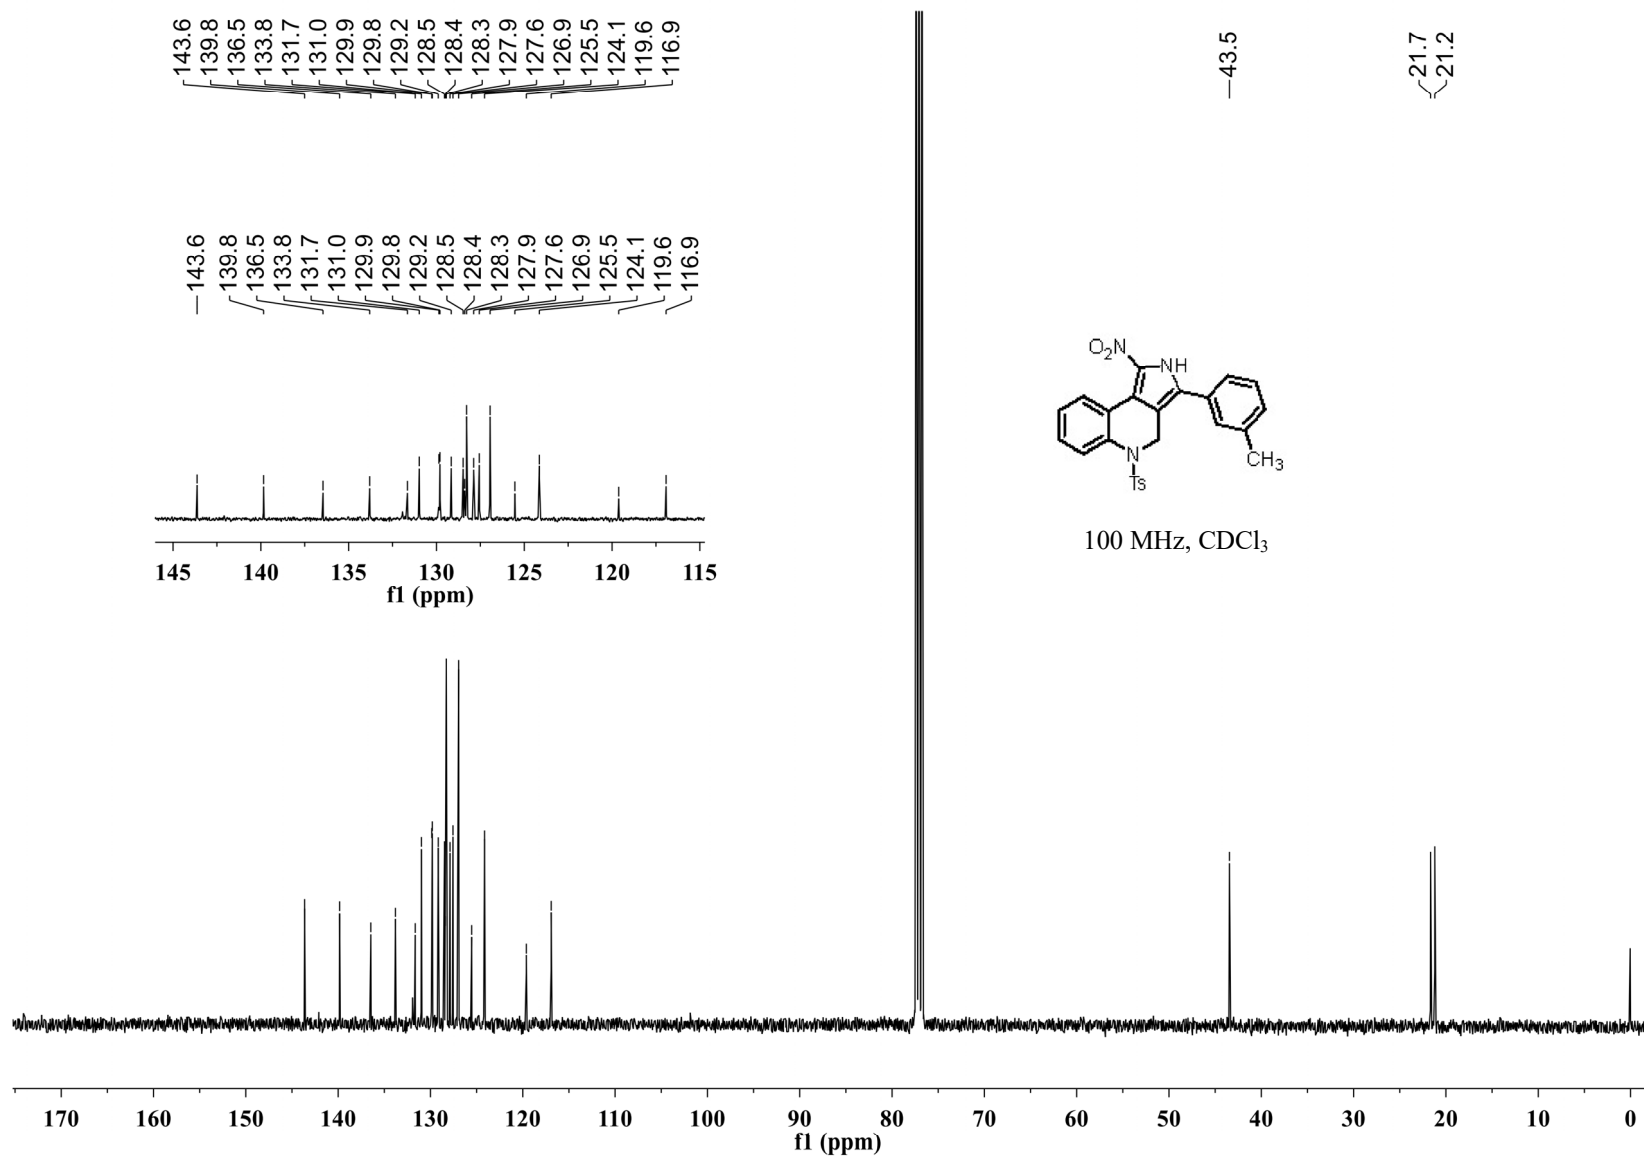

<sup>13</sup>C NMR Spectrum of Compound 3c

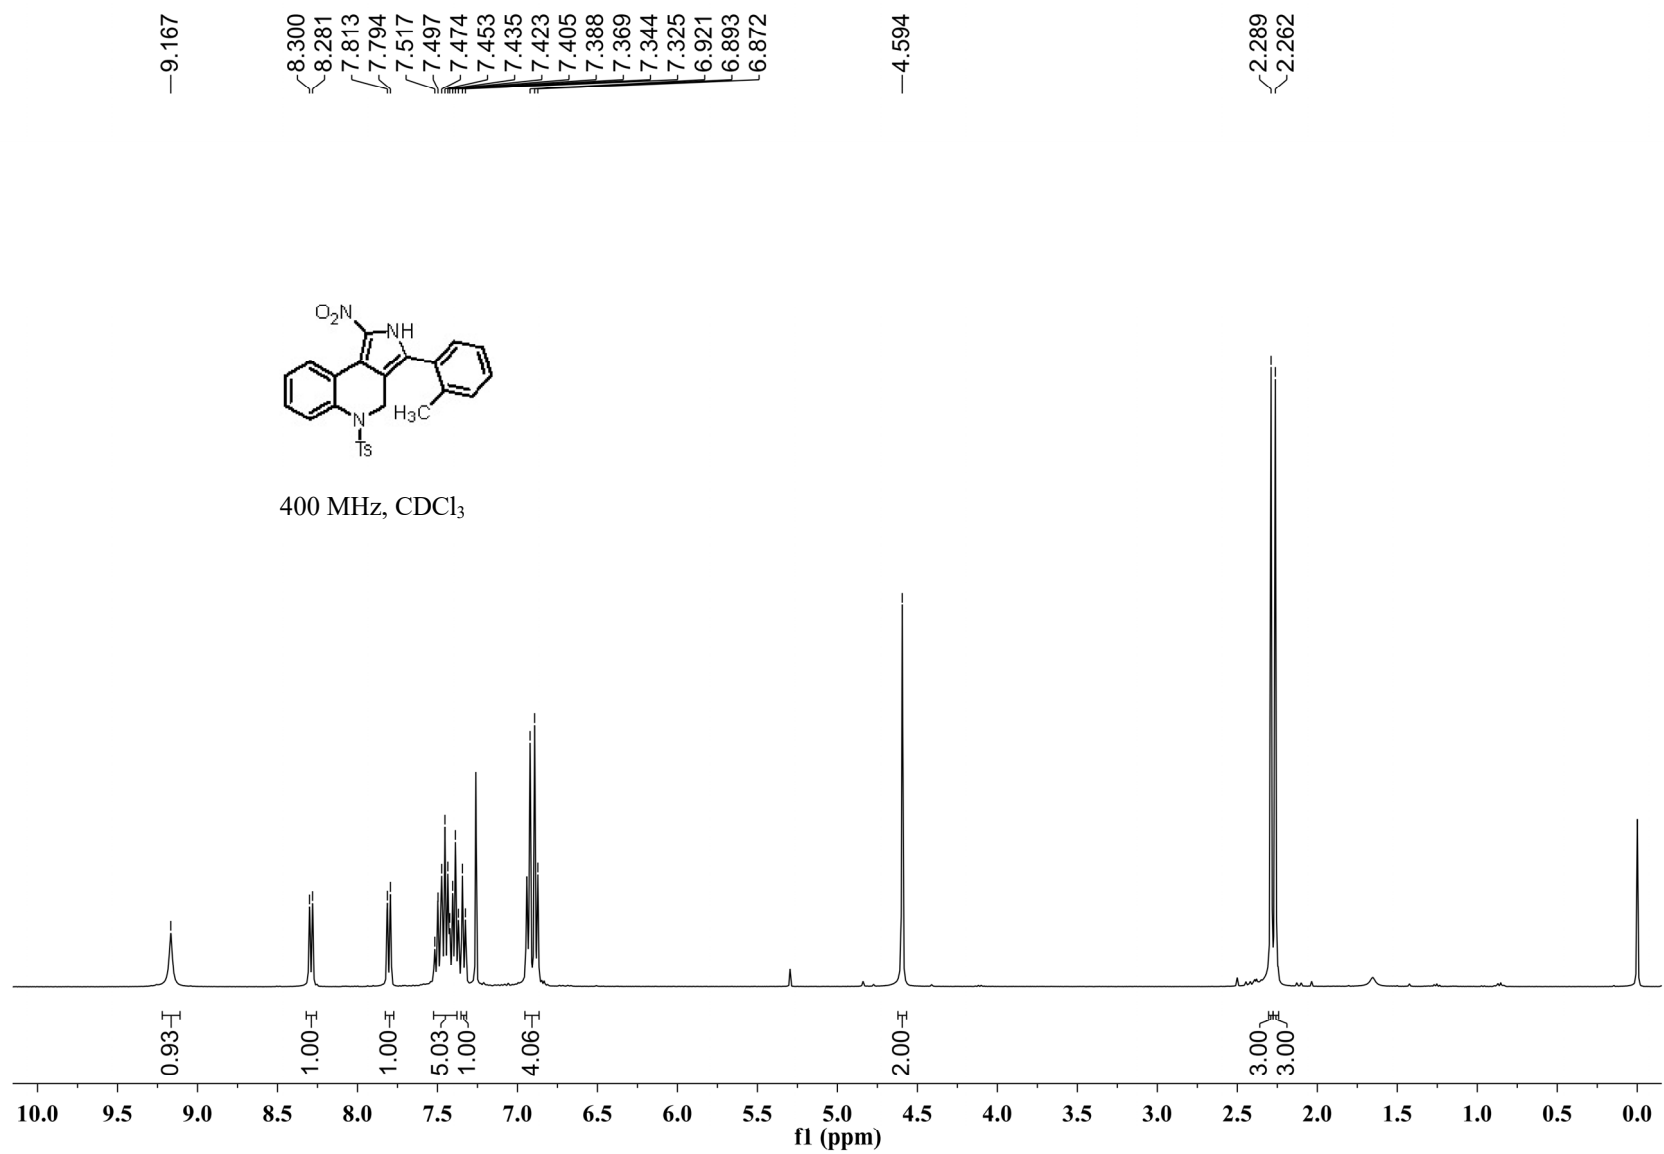

<sup>1</sup>H NMR Spectrum of Compound 3d

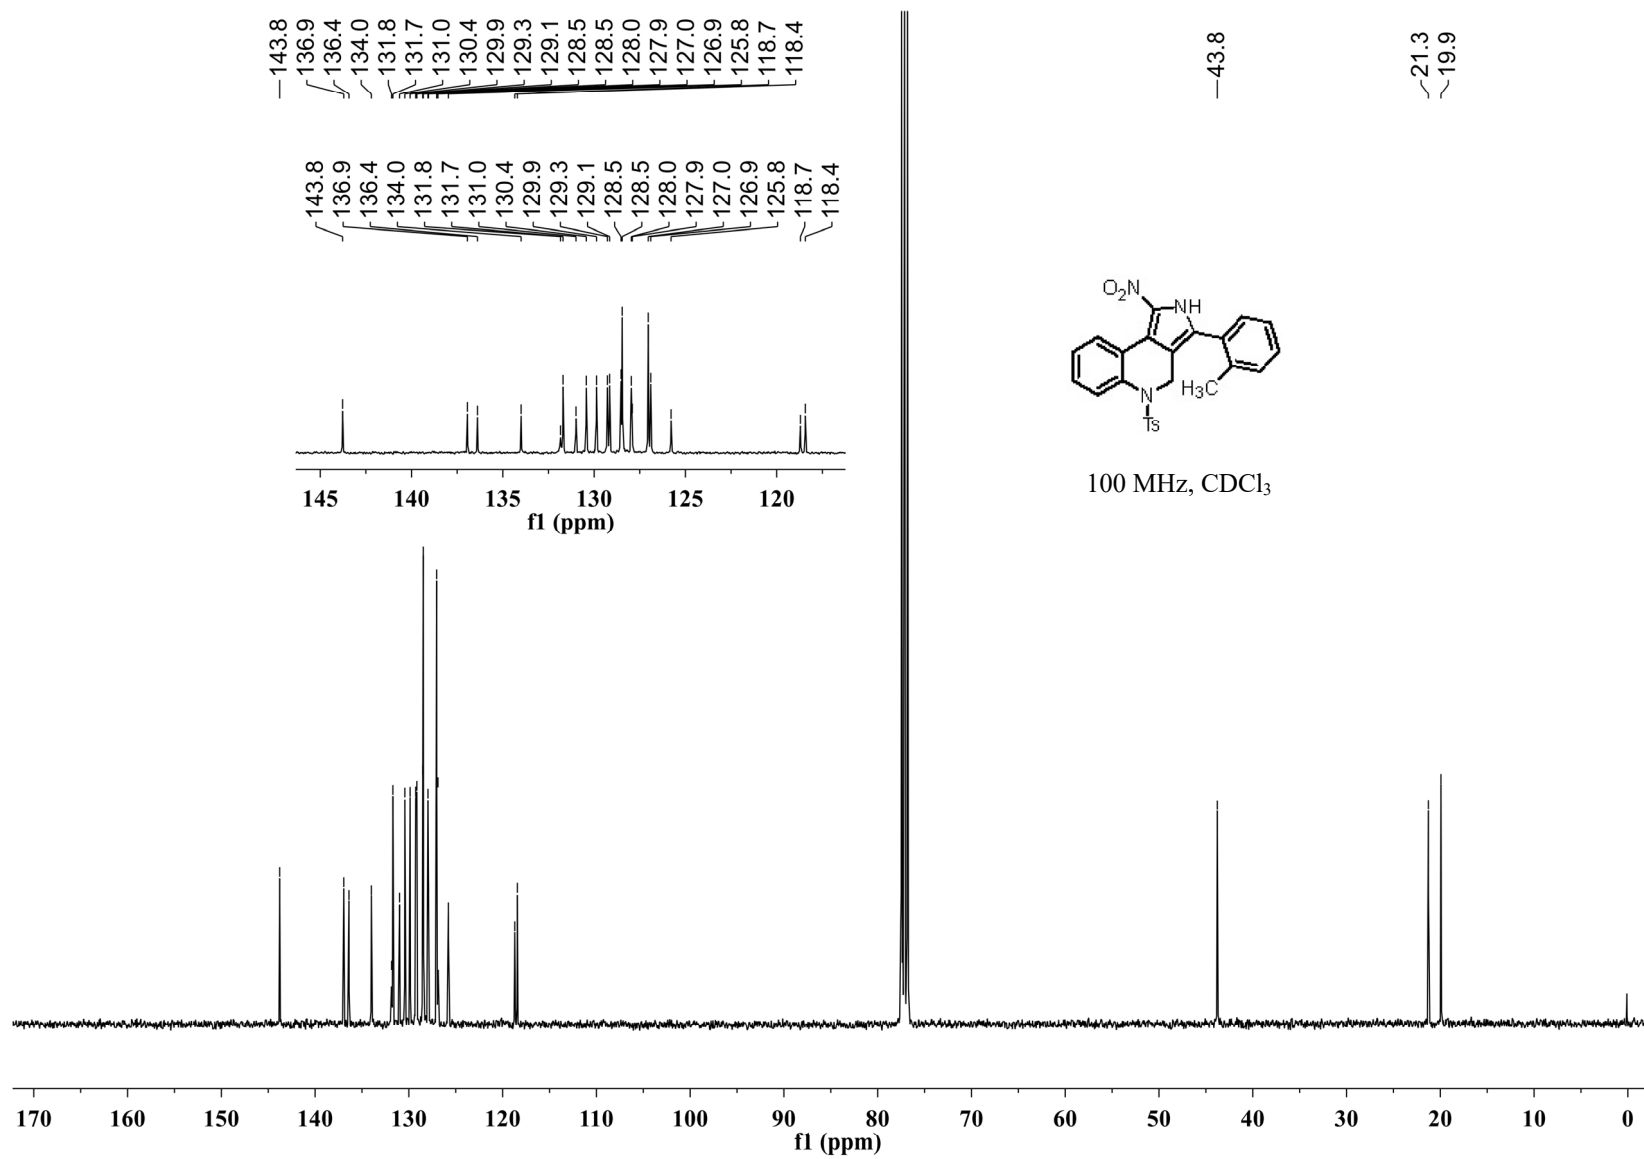

<sup>13</sup>C NMR Spectrum of Compound 3d



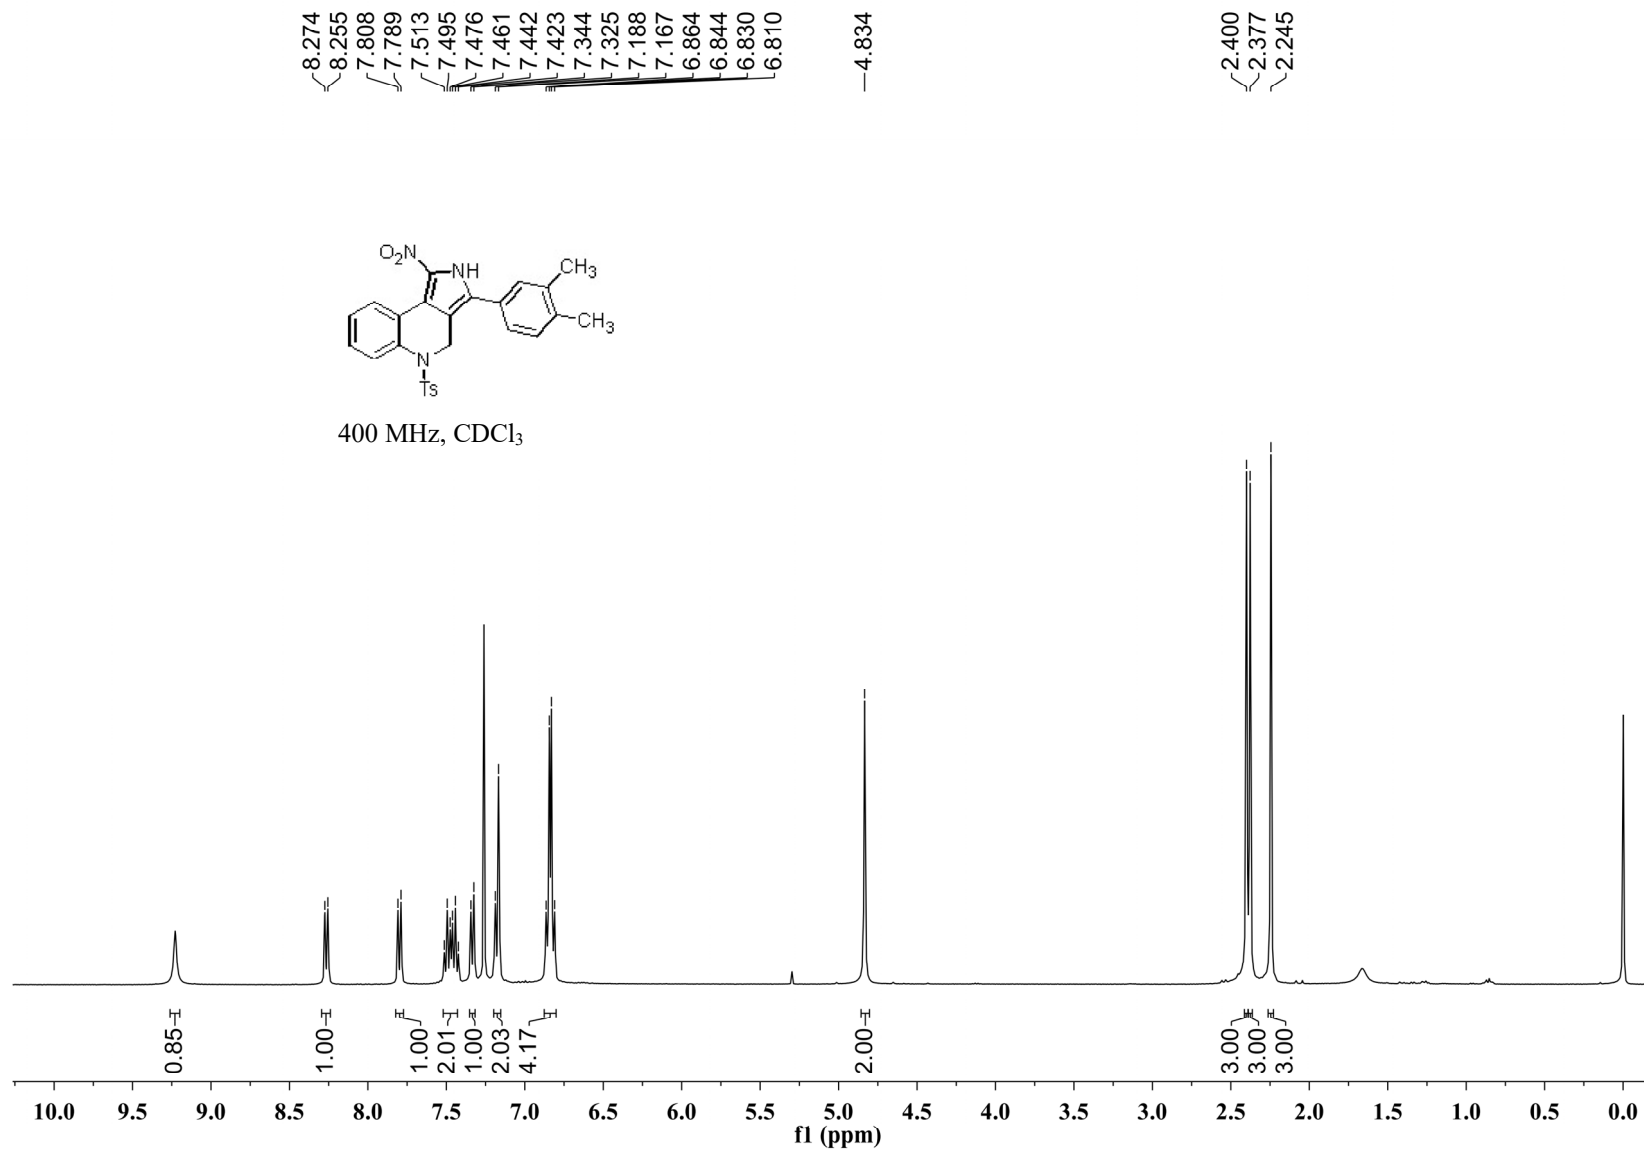

<sup>1</sup>H NMR Spectrum of Compound 3e

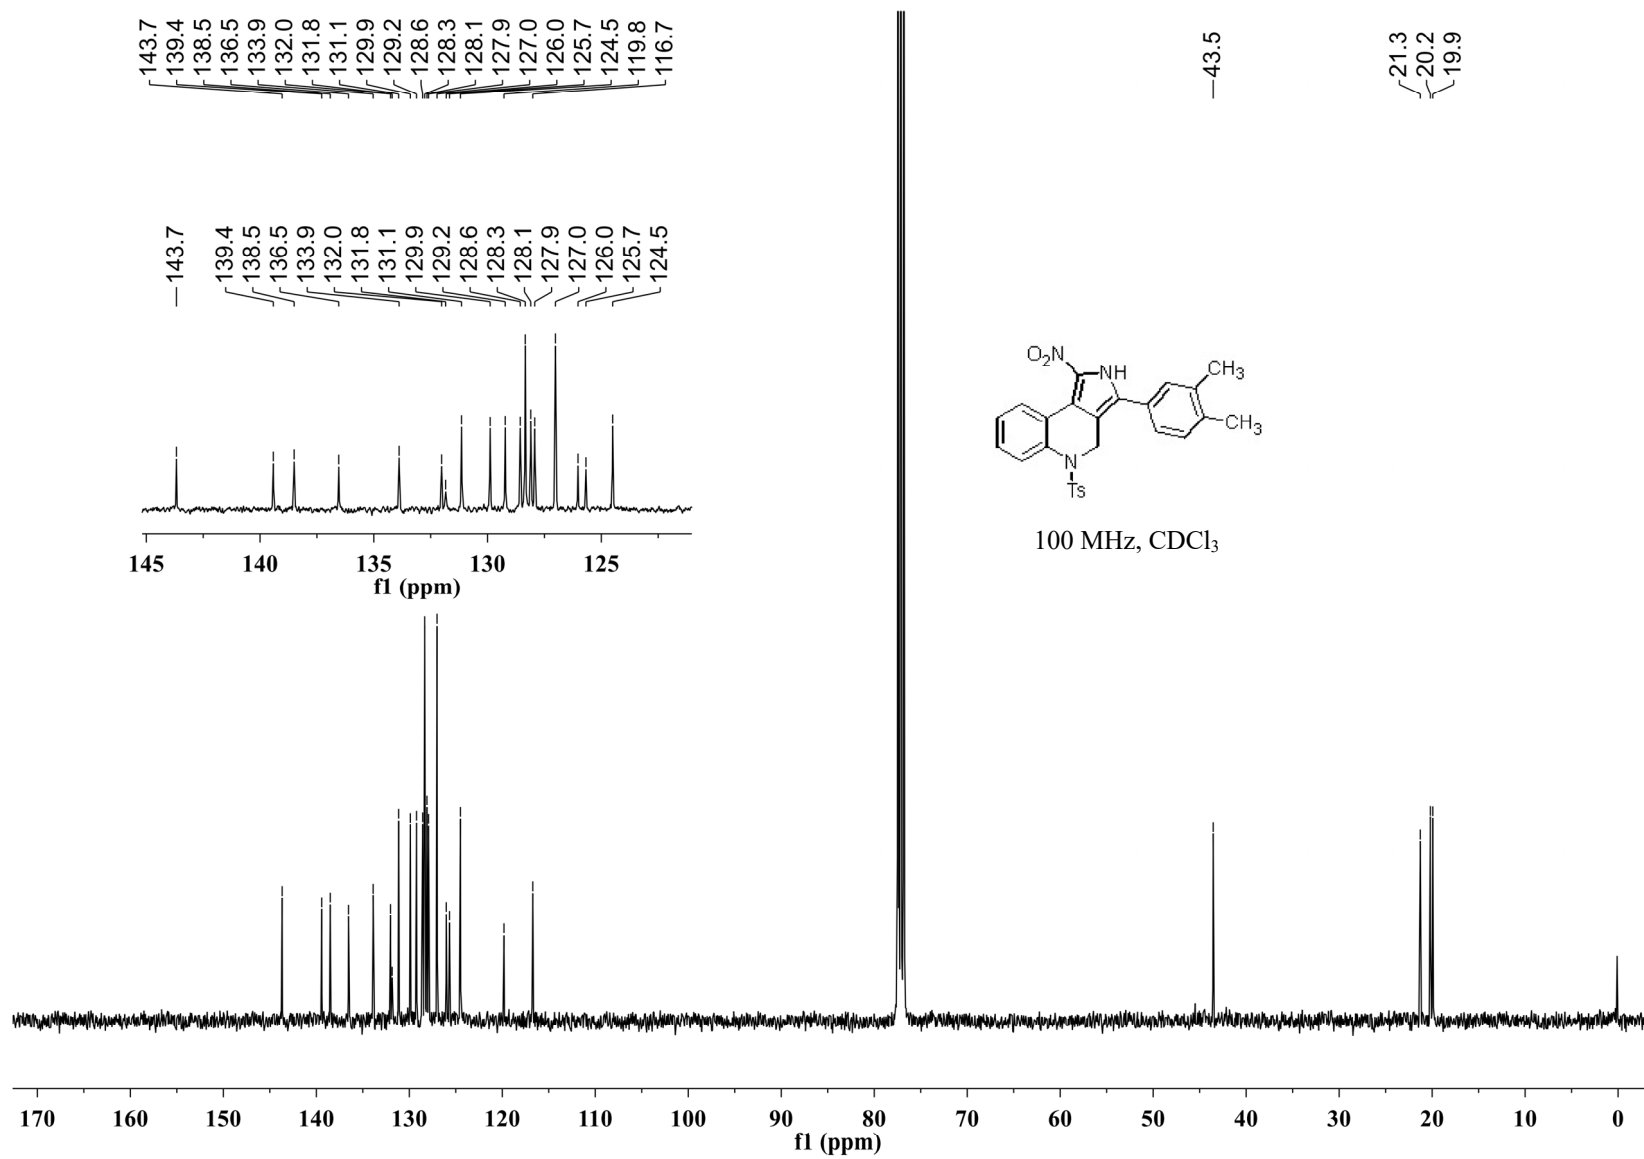

<sup>13</sup>C NMR Spectrum of Compound 3e



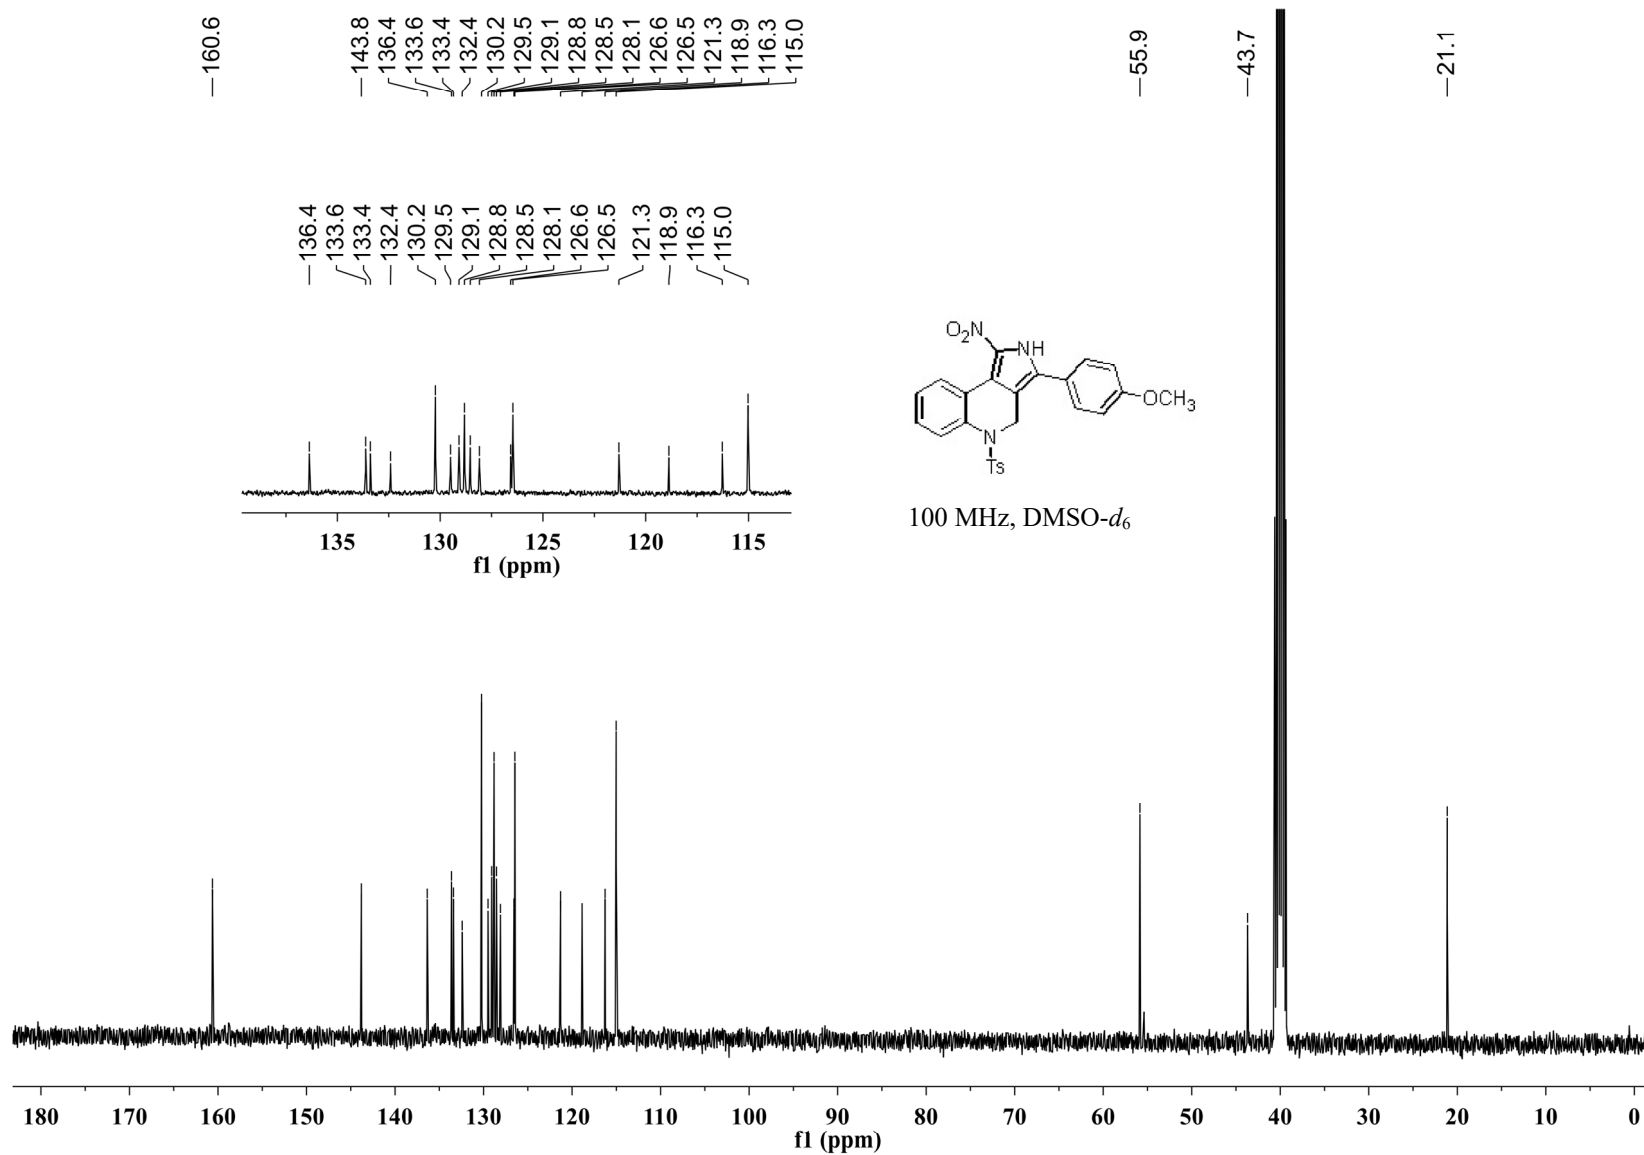

<sup>13</sup>C NMR Spectrum of Compound 3f

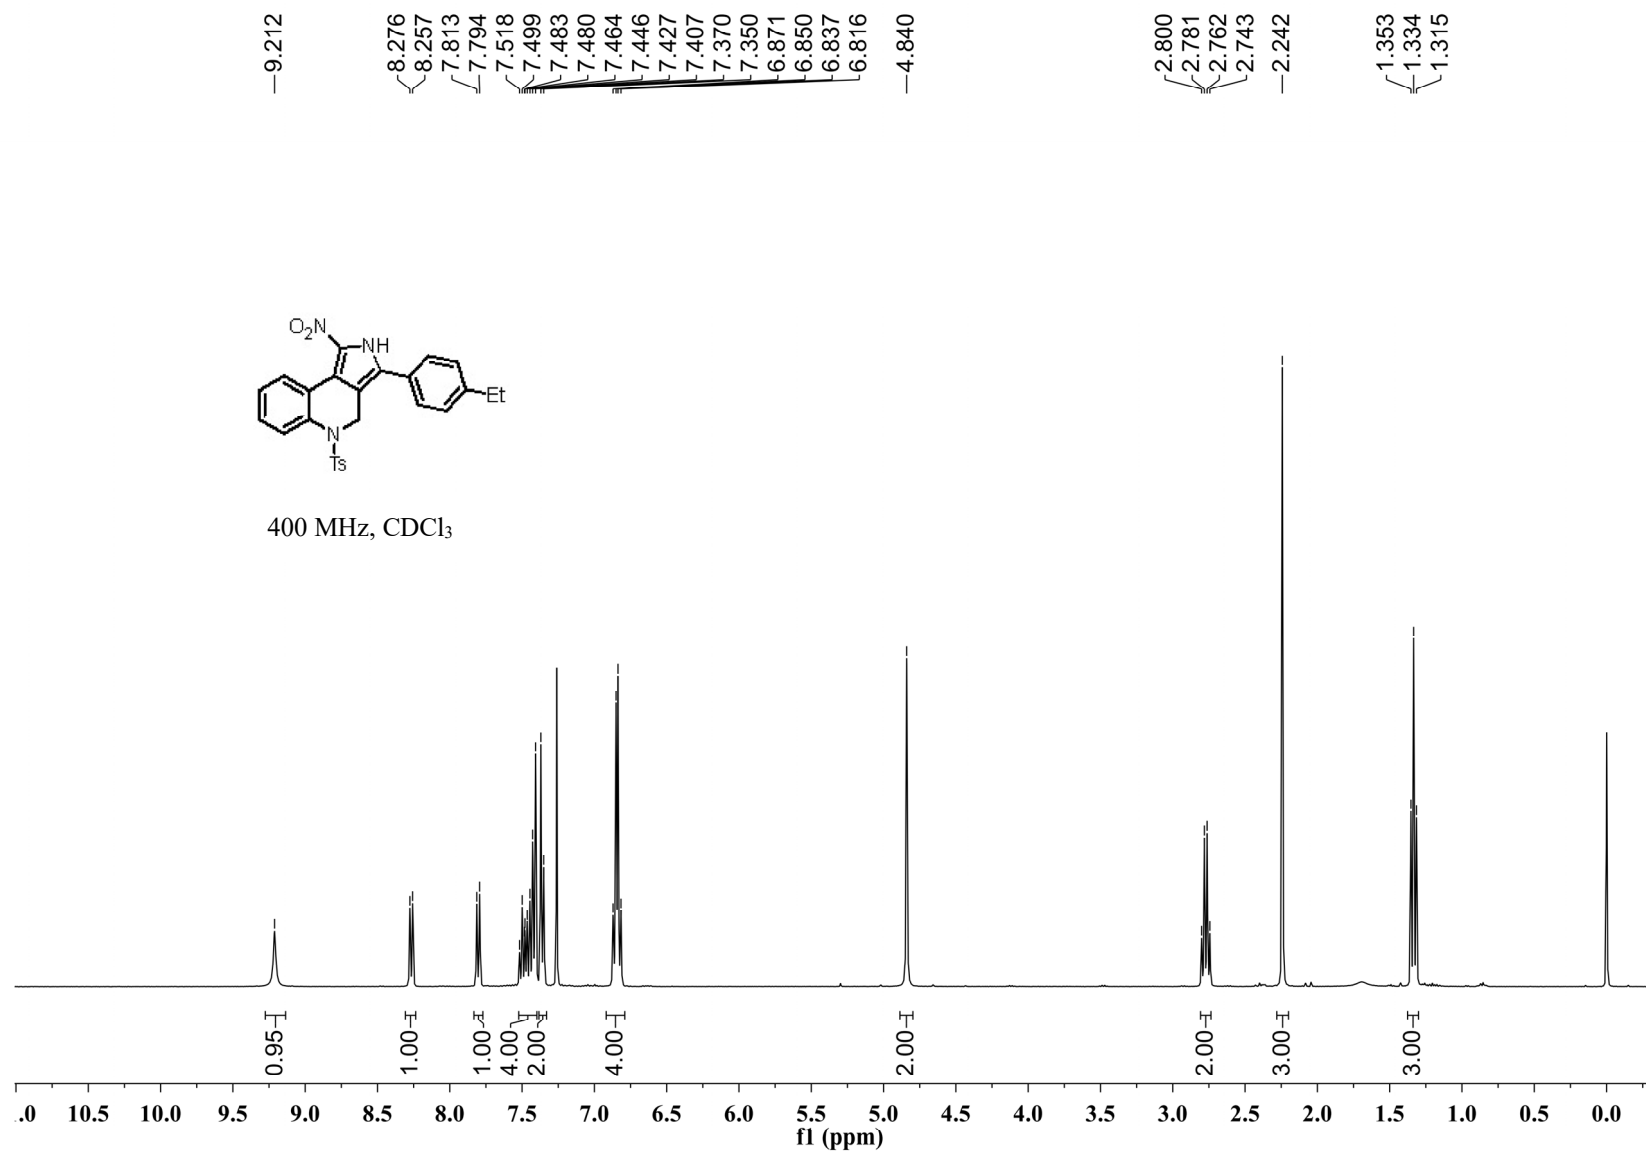

<sup>1</sup>H NMR Spectrum of Compound 3g

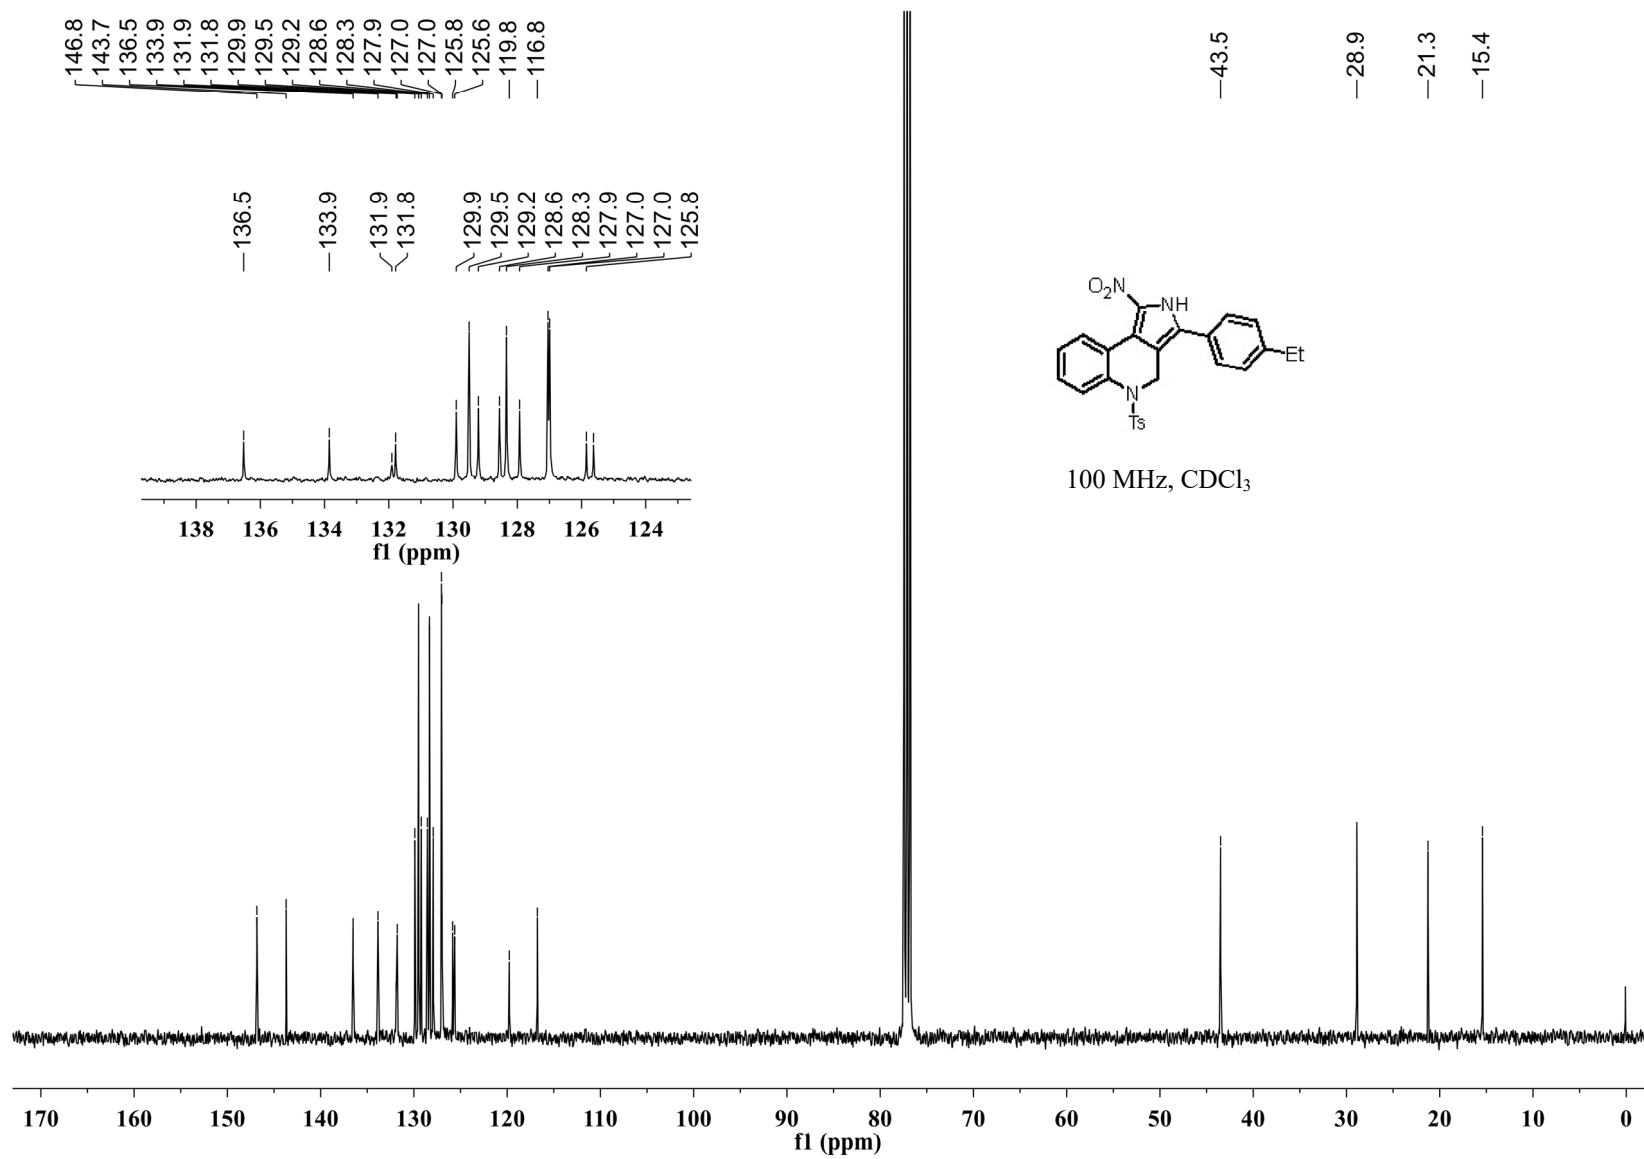

<sup>13</sup>C NMR Spectrum of Compound 3g

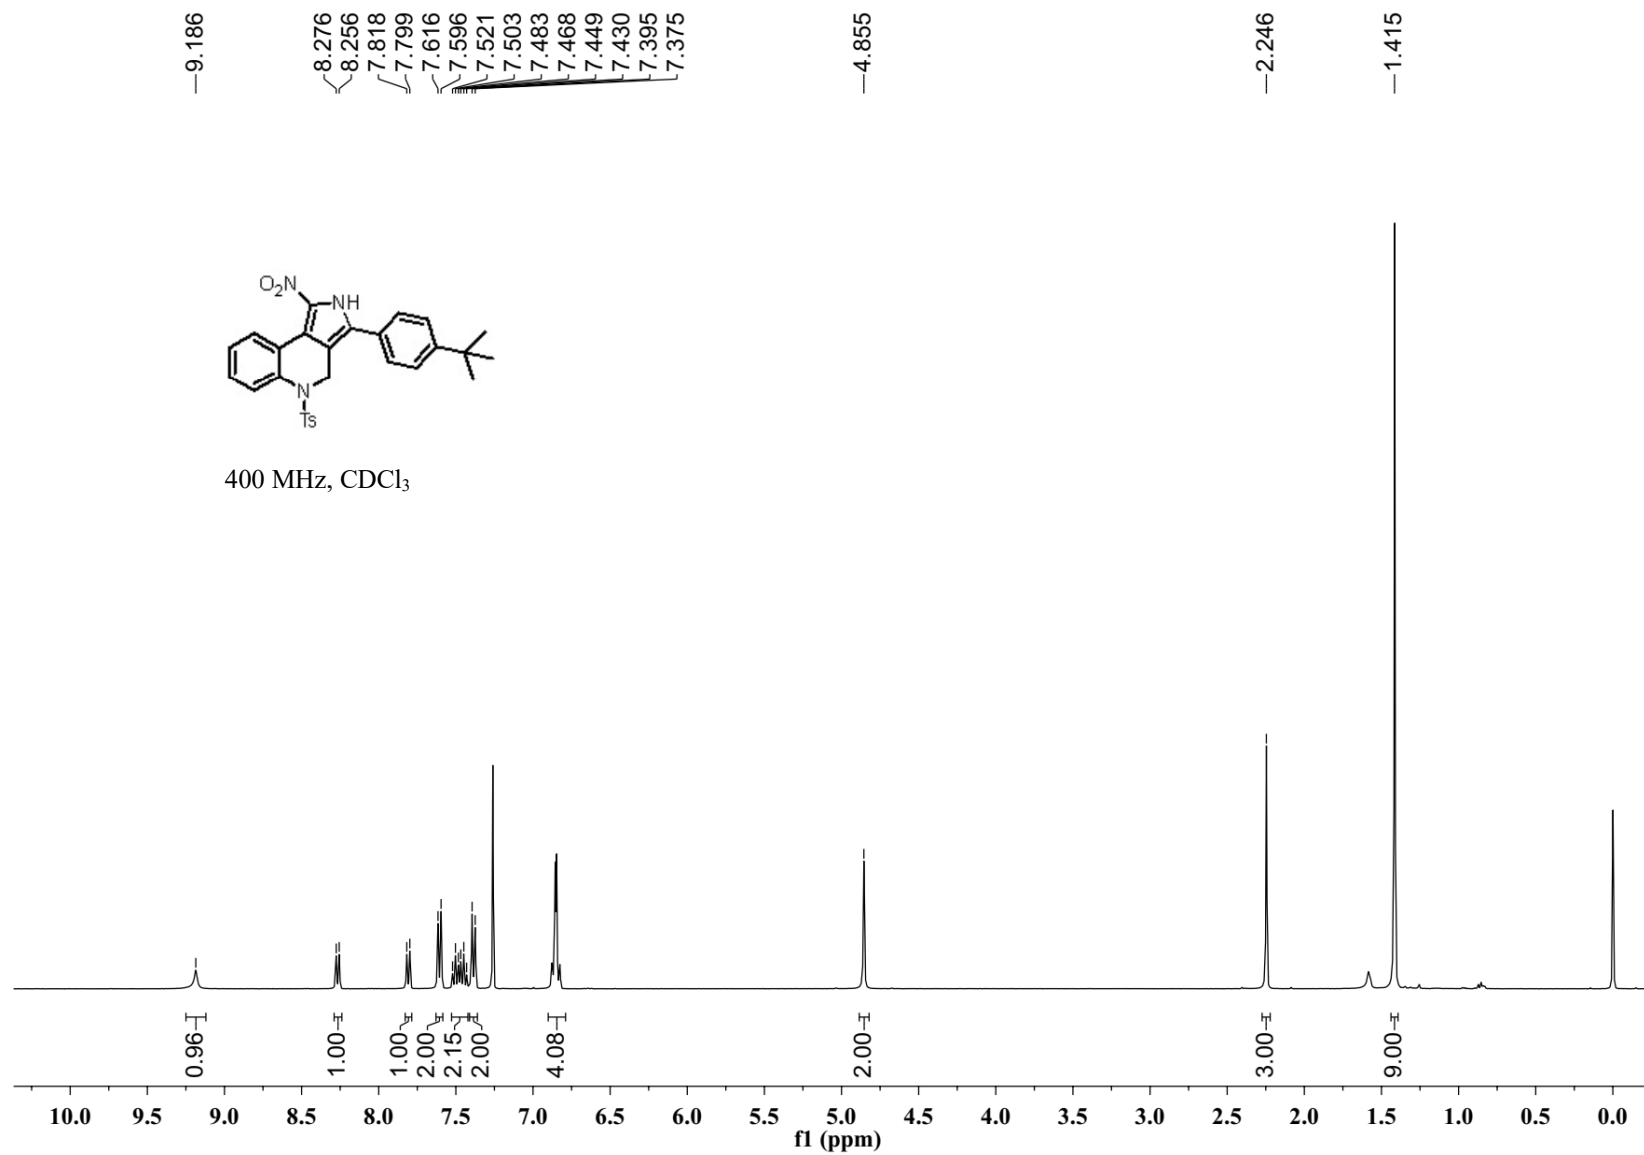

<sup>1</sup>H NMR Spectrum of Compound 3h

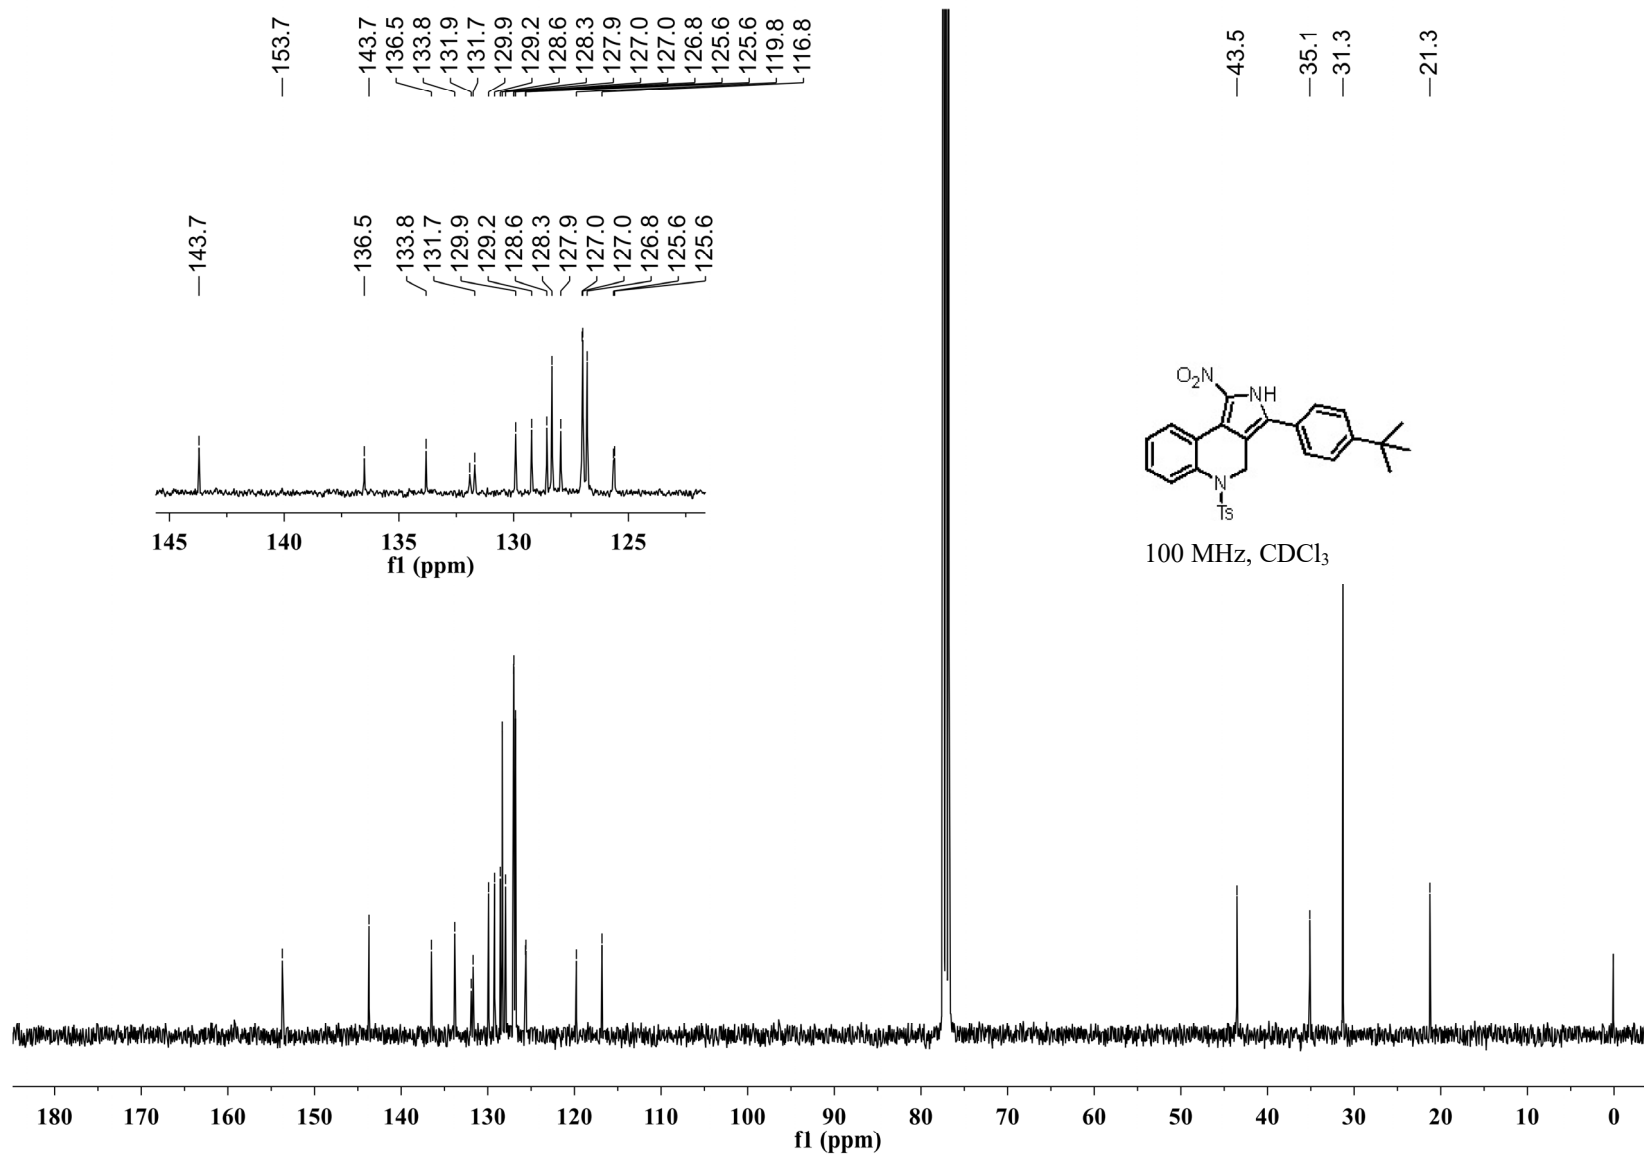

<sup>13</sup>C NMR Spectrum of Compound 3h



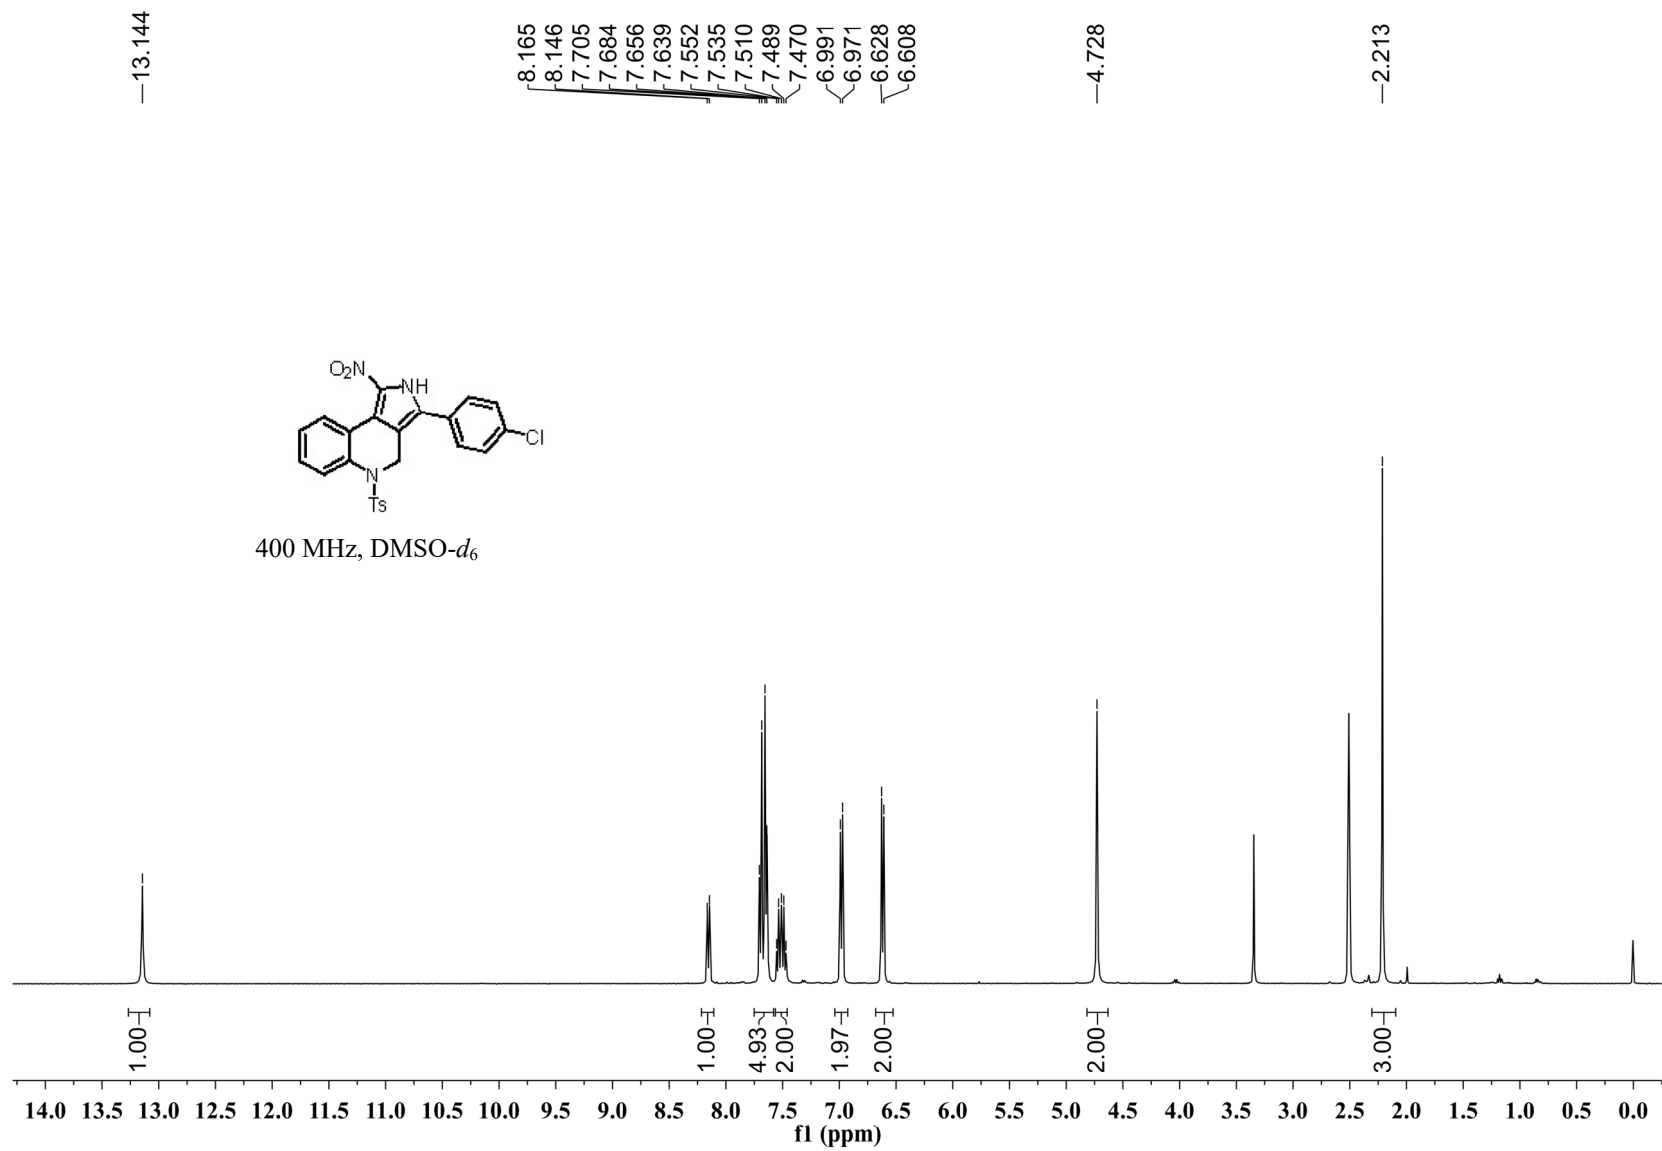

<sup>1</sup>H NMR Spectrum of Compound 3i

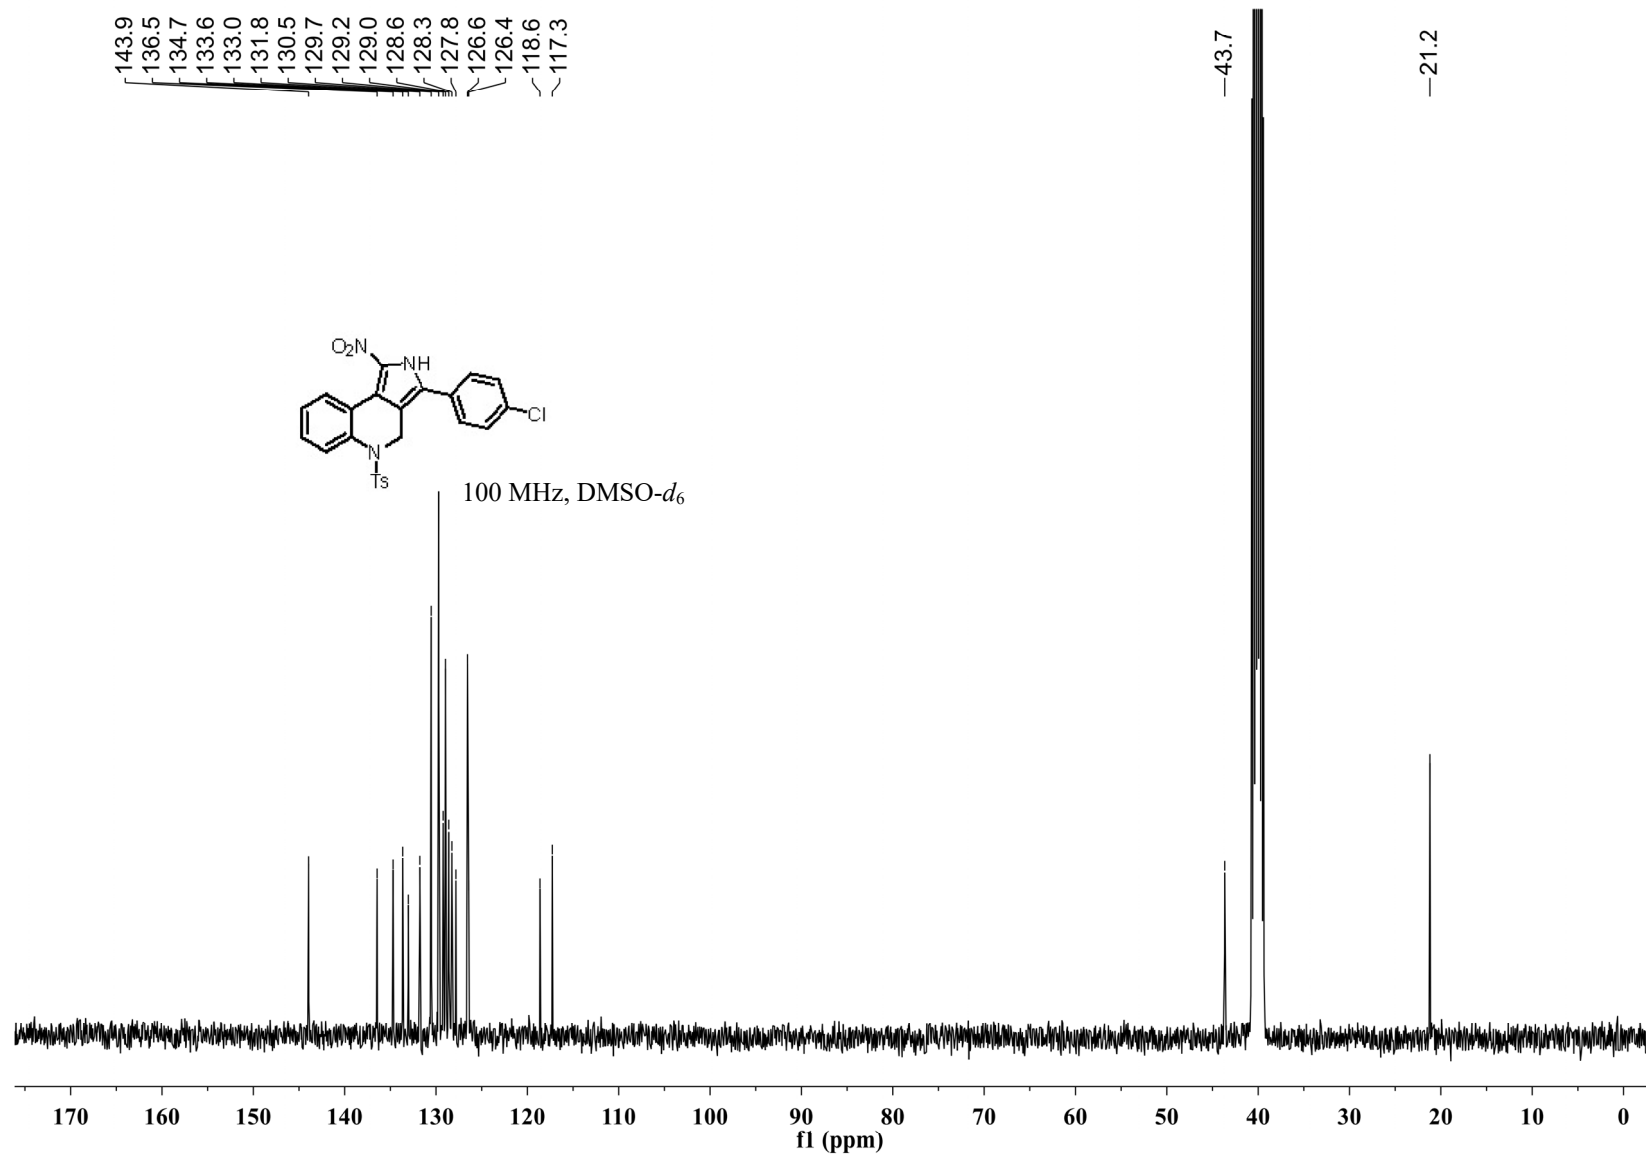

<sup>13</sup>C NMR Spectrum of Compound 3i

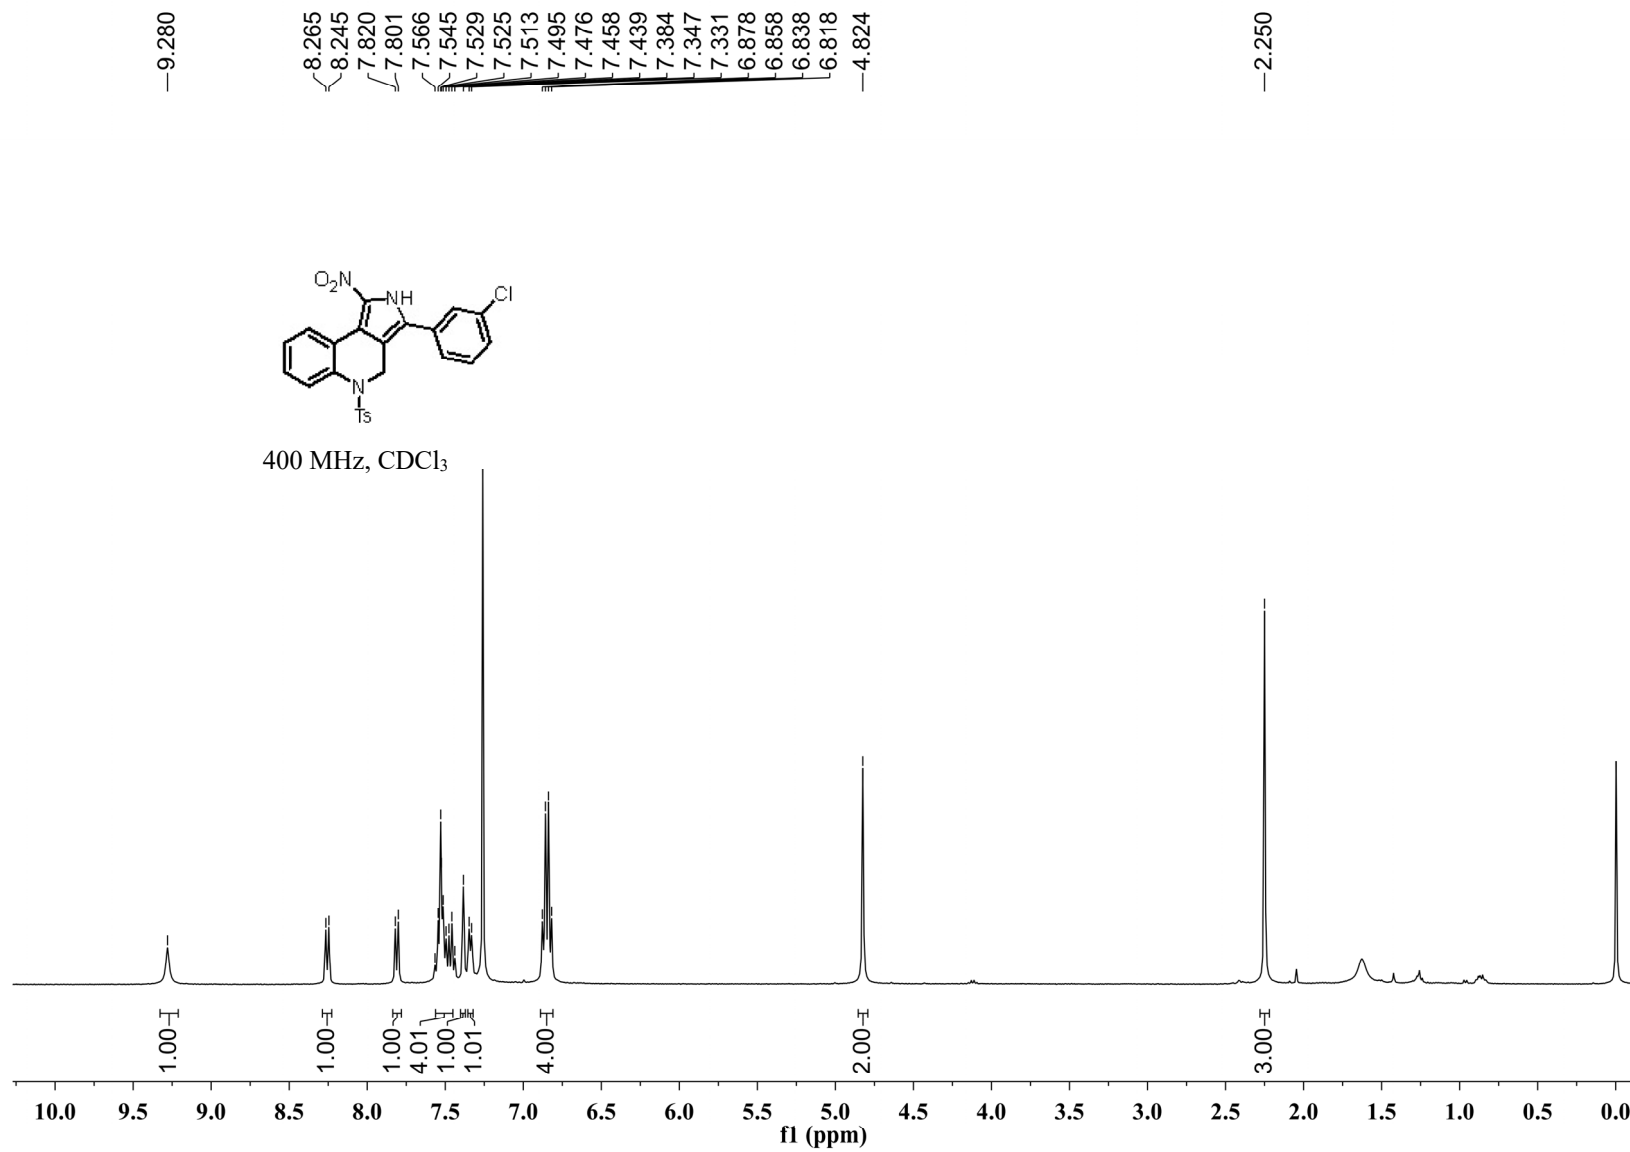

<sup>1</sup>H NMR Spectrum of Compound 3j

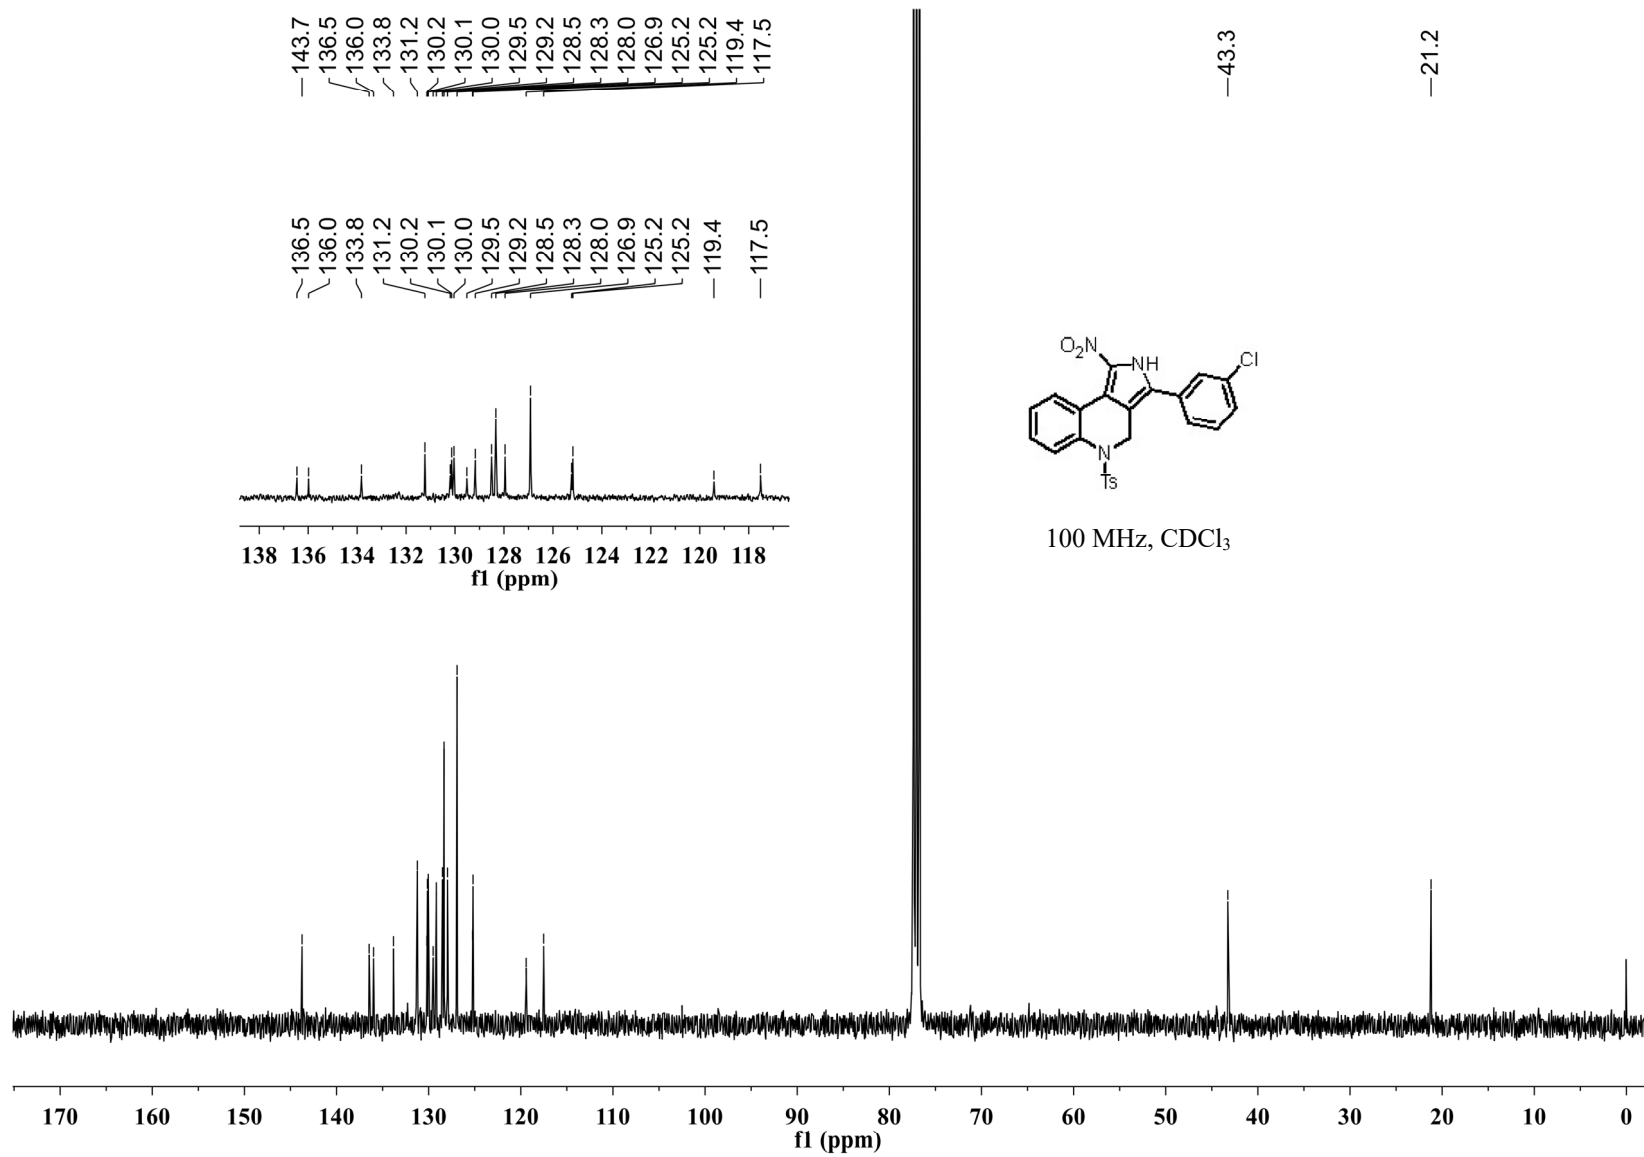

<sup>13</sup>C NMR Spectrum of Compound 3j

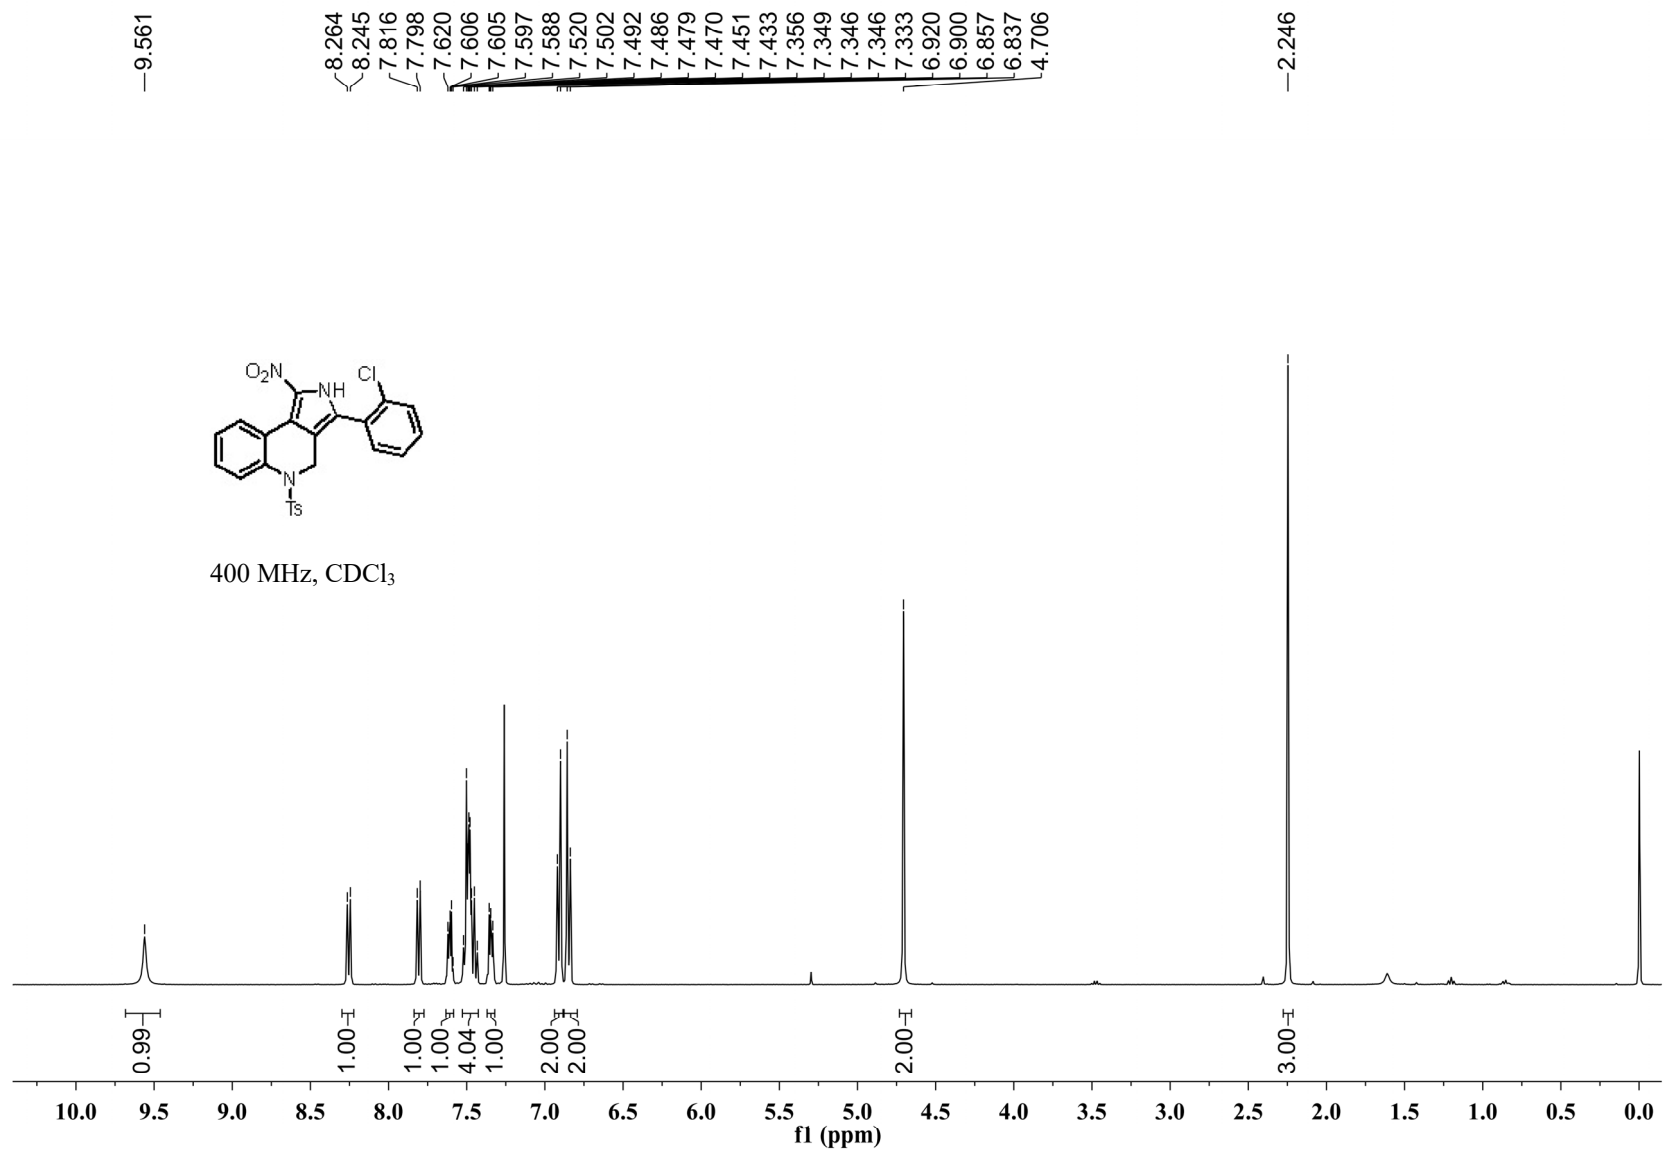

<sup>1</sup>H NMR Spectrum of Compound 3k

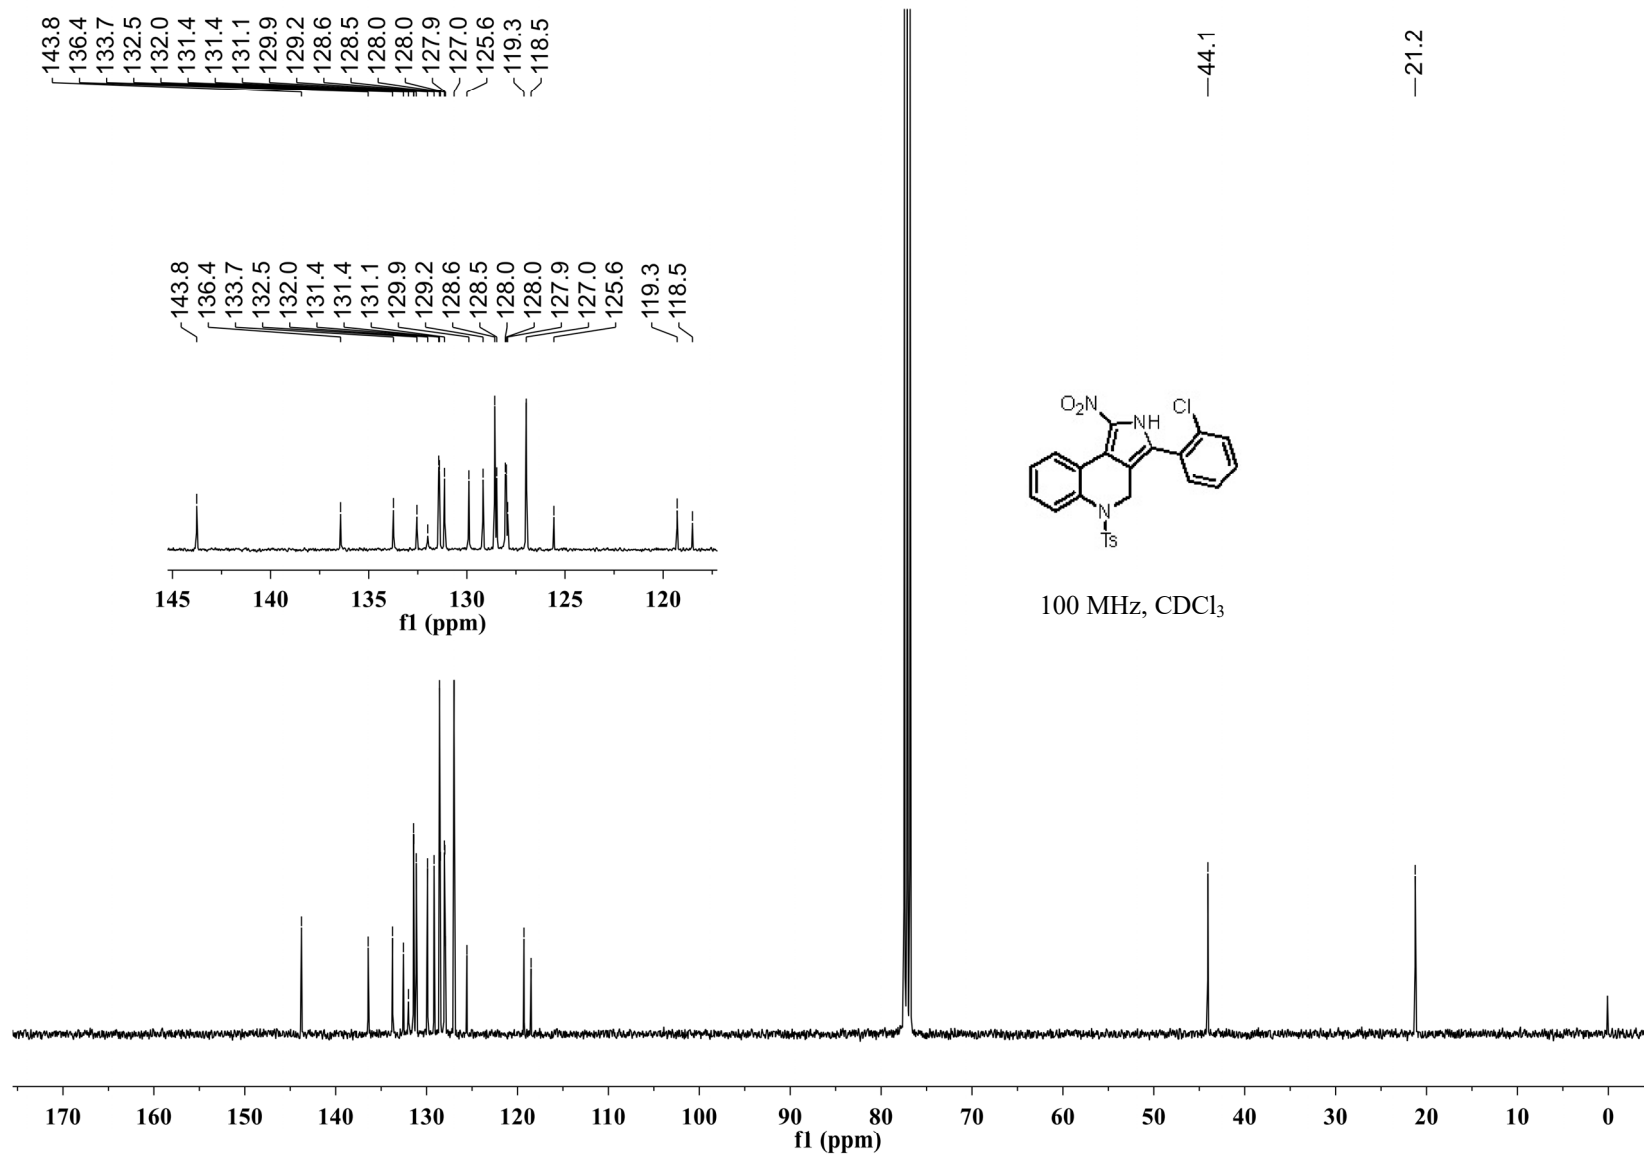

<sup>13</sup>C NMR Spectrum of Compound 3k

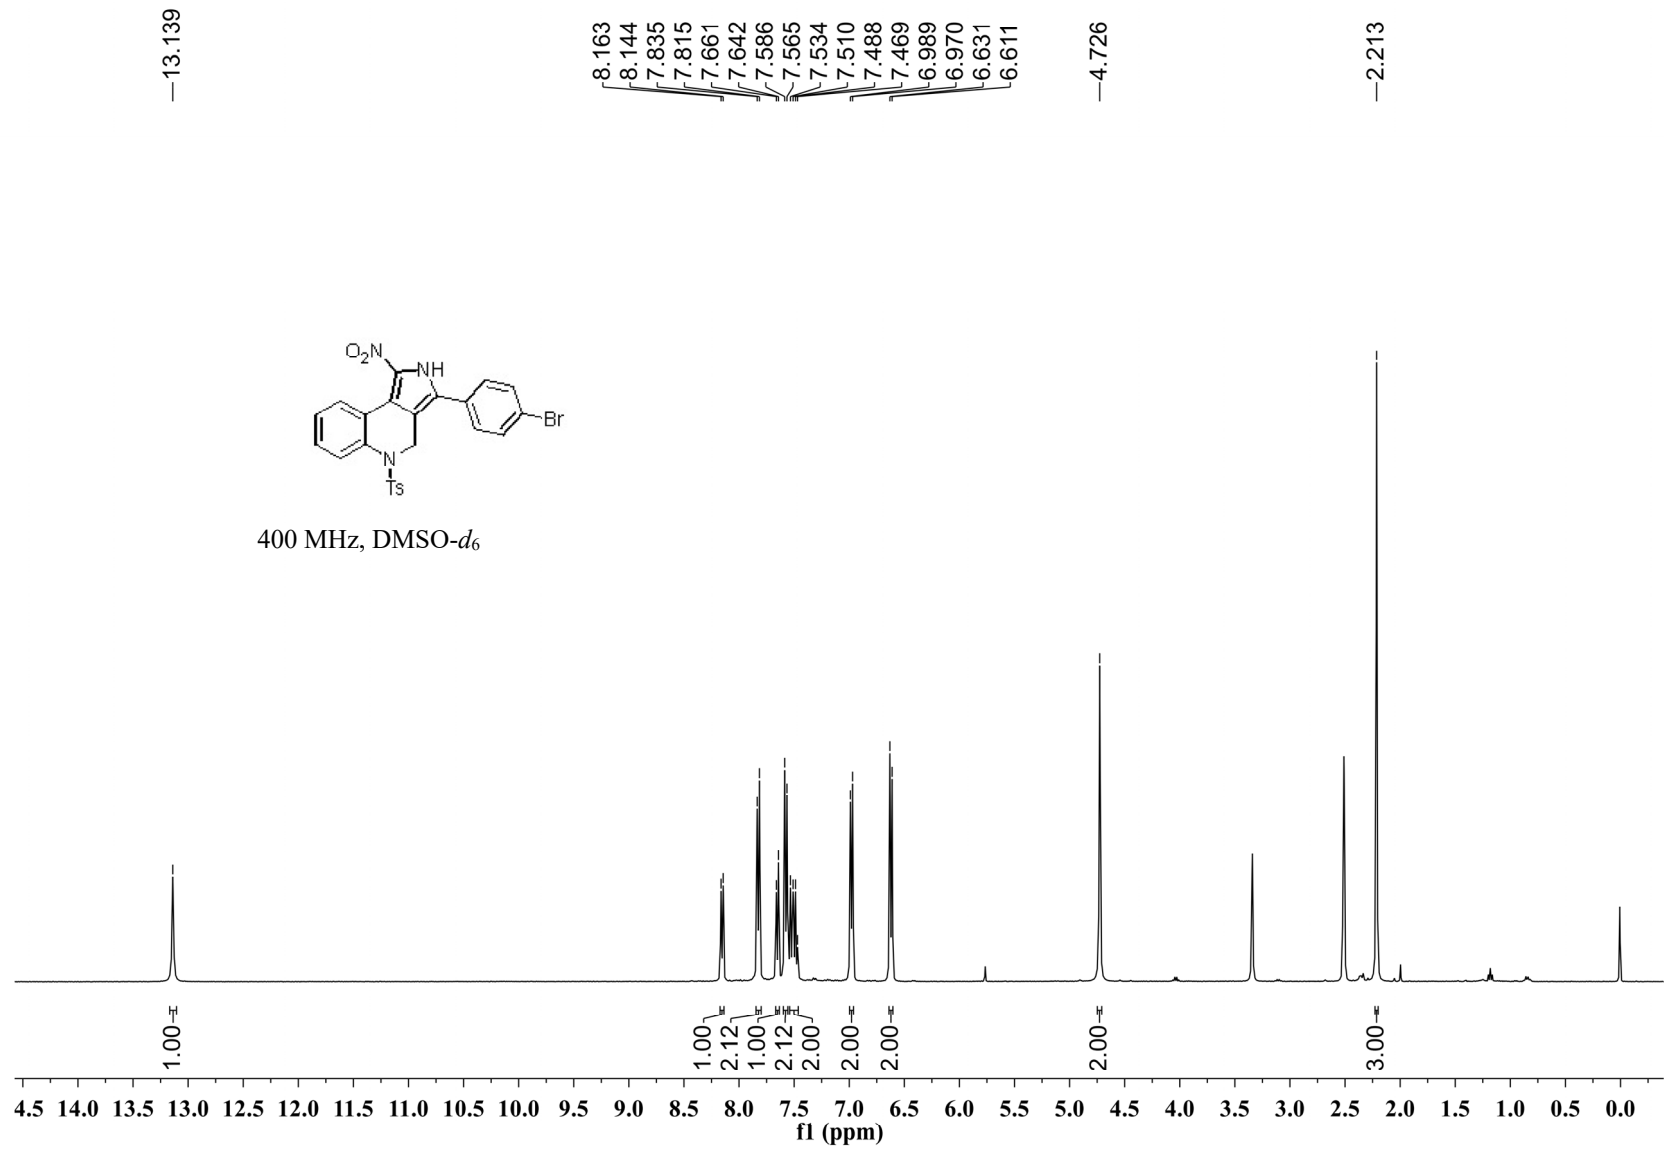

<sup>1</sup>H NMR Spectrum of Compound 31

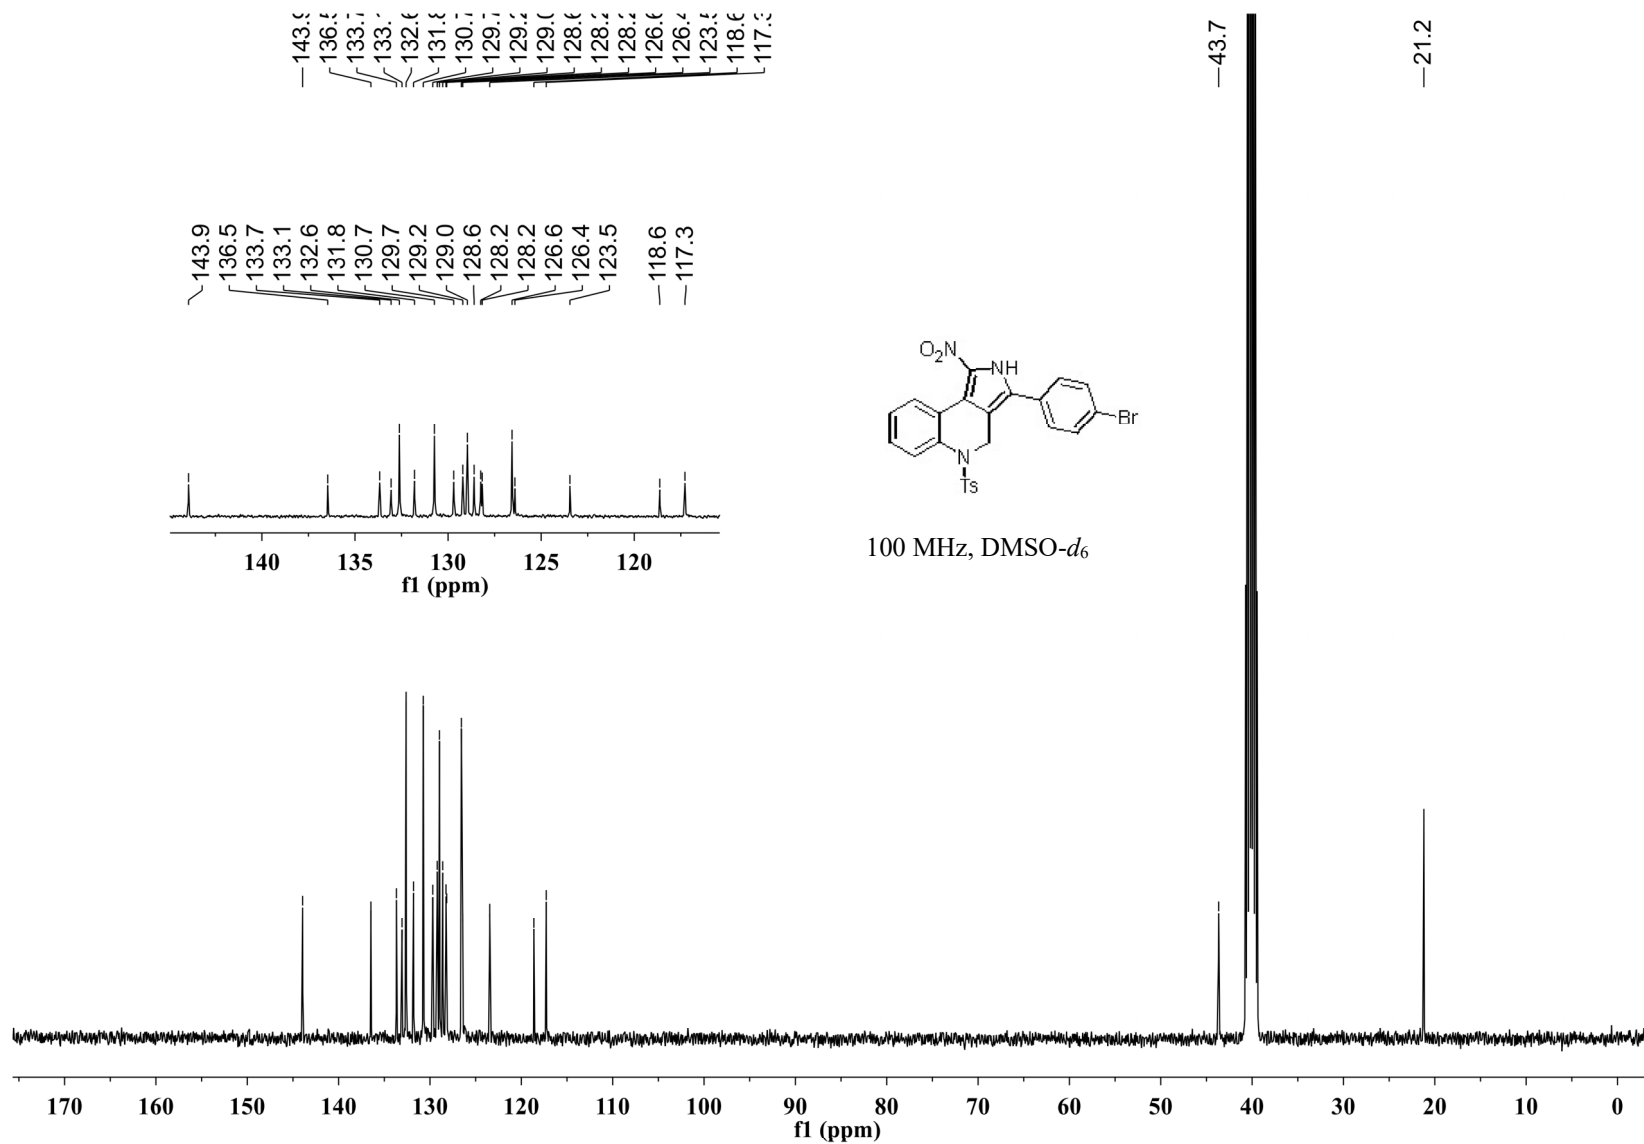

<sup>13</sup>C NMR Spectrum of Compound 31



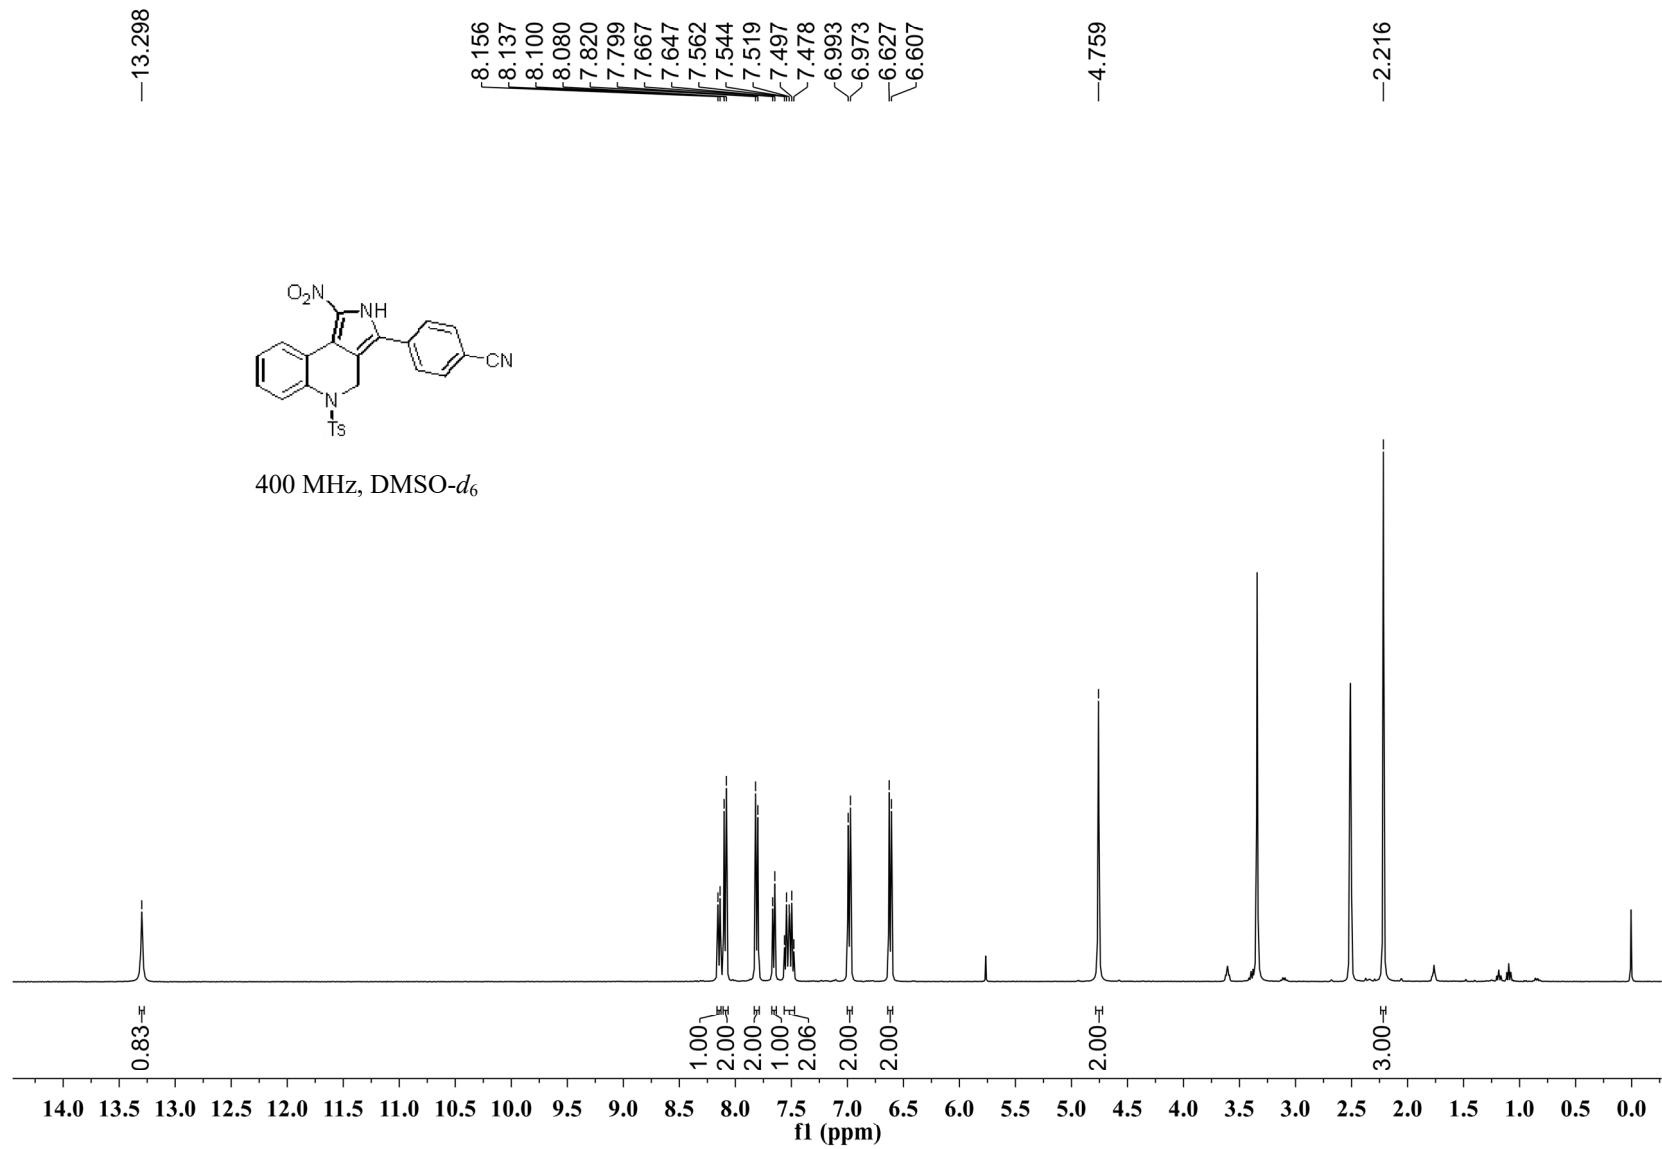

<sup>1</sup>H NMR Spectrum of Compound 3m

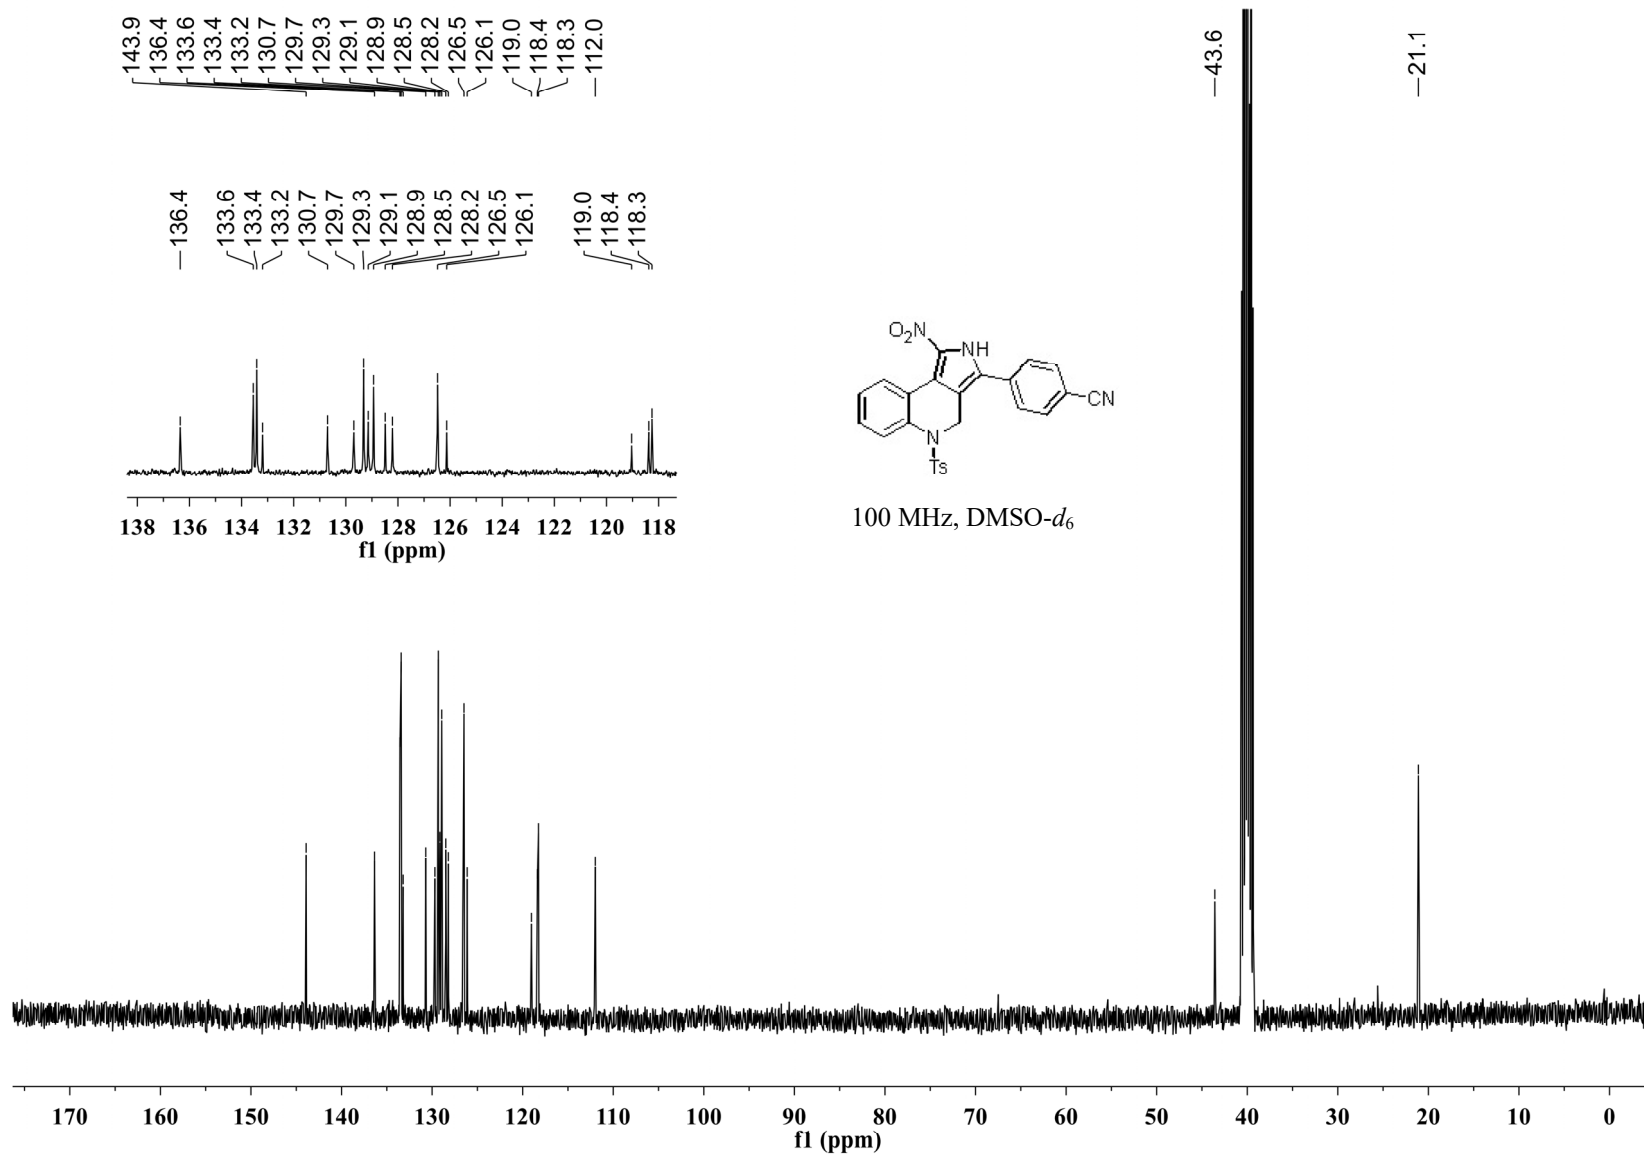

<sup>13</sup>C NMR Spectrum of Compound 3m

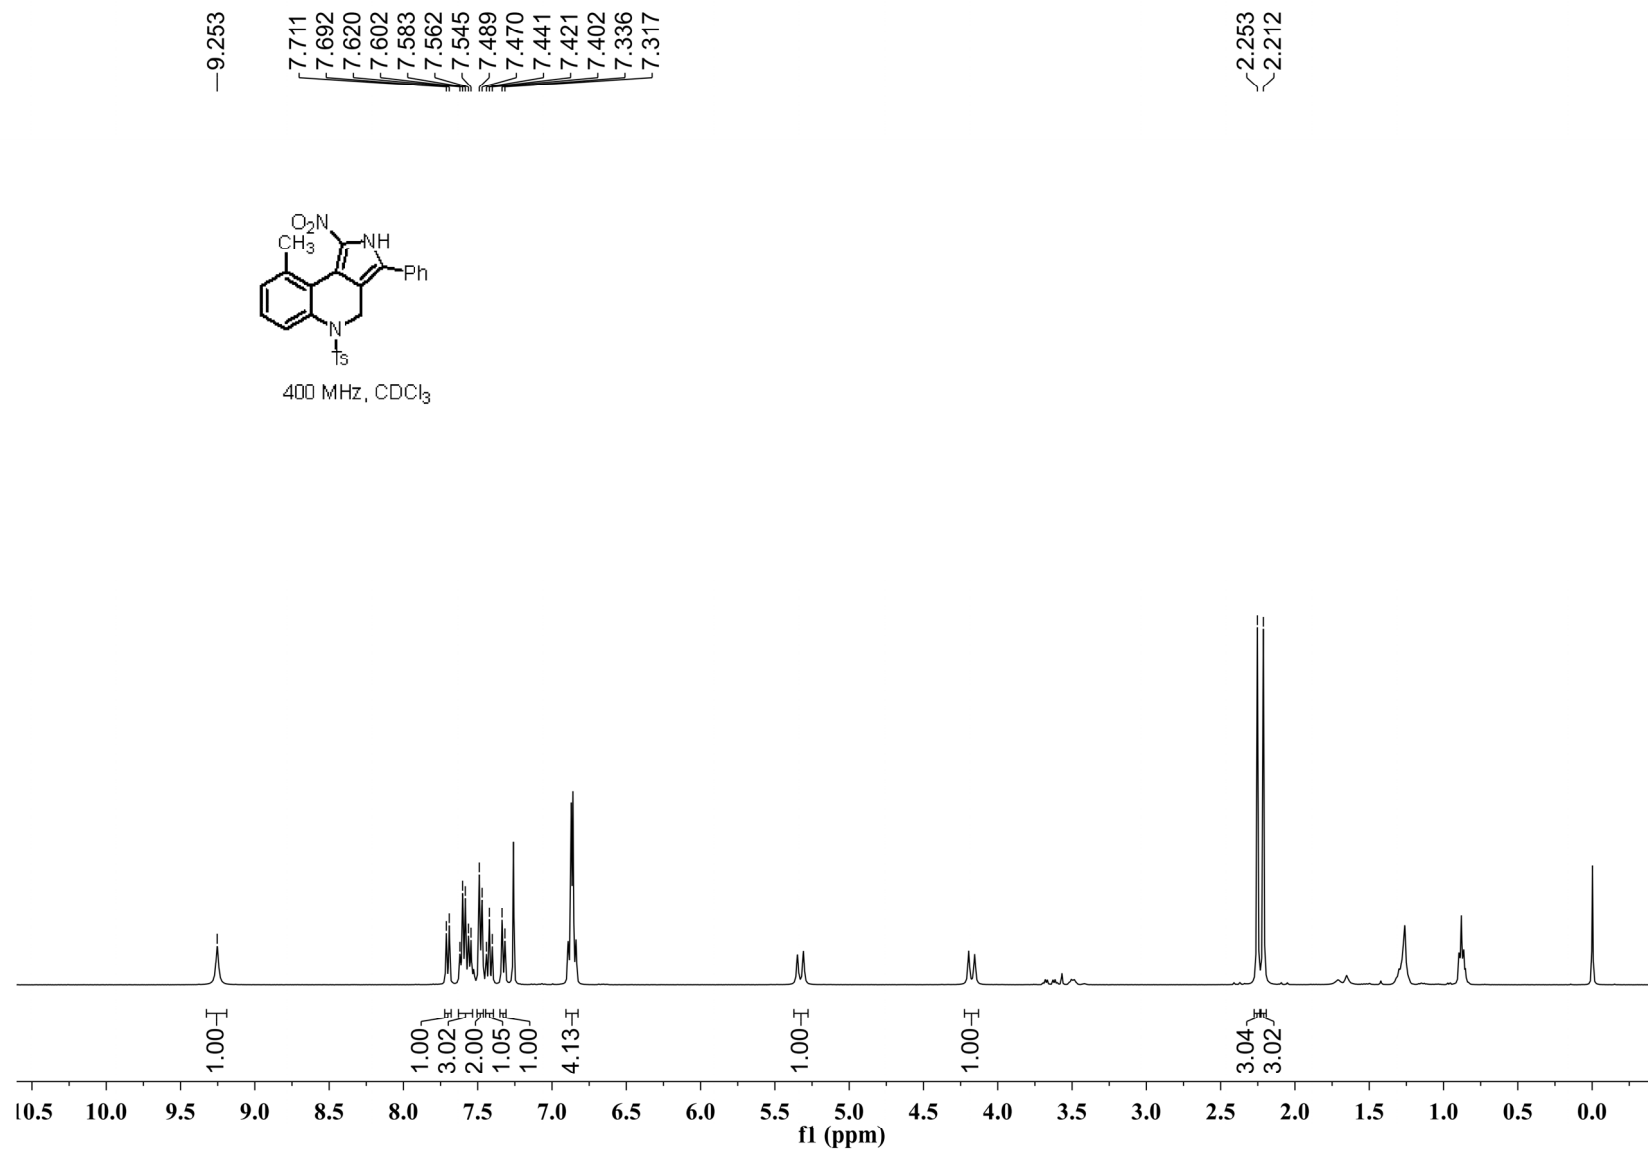

<sup>1</sup>H NMR Spectrum of Compound 3p

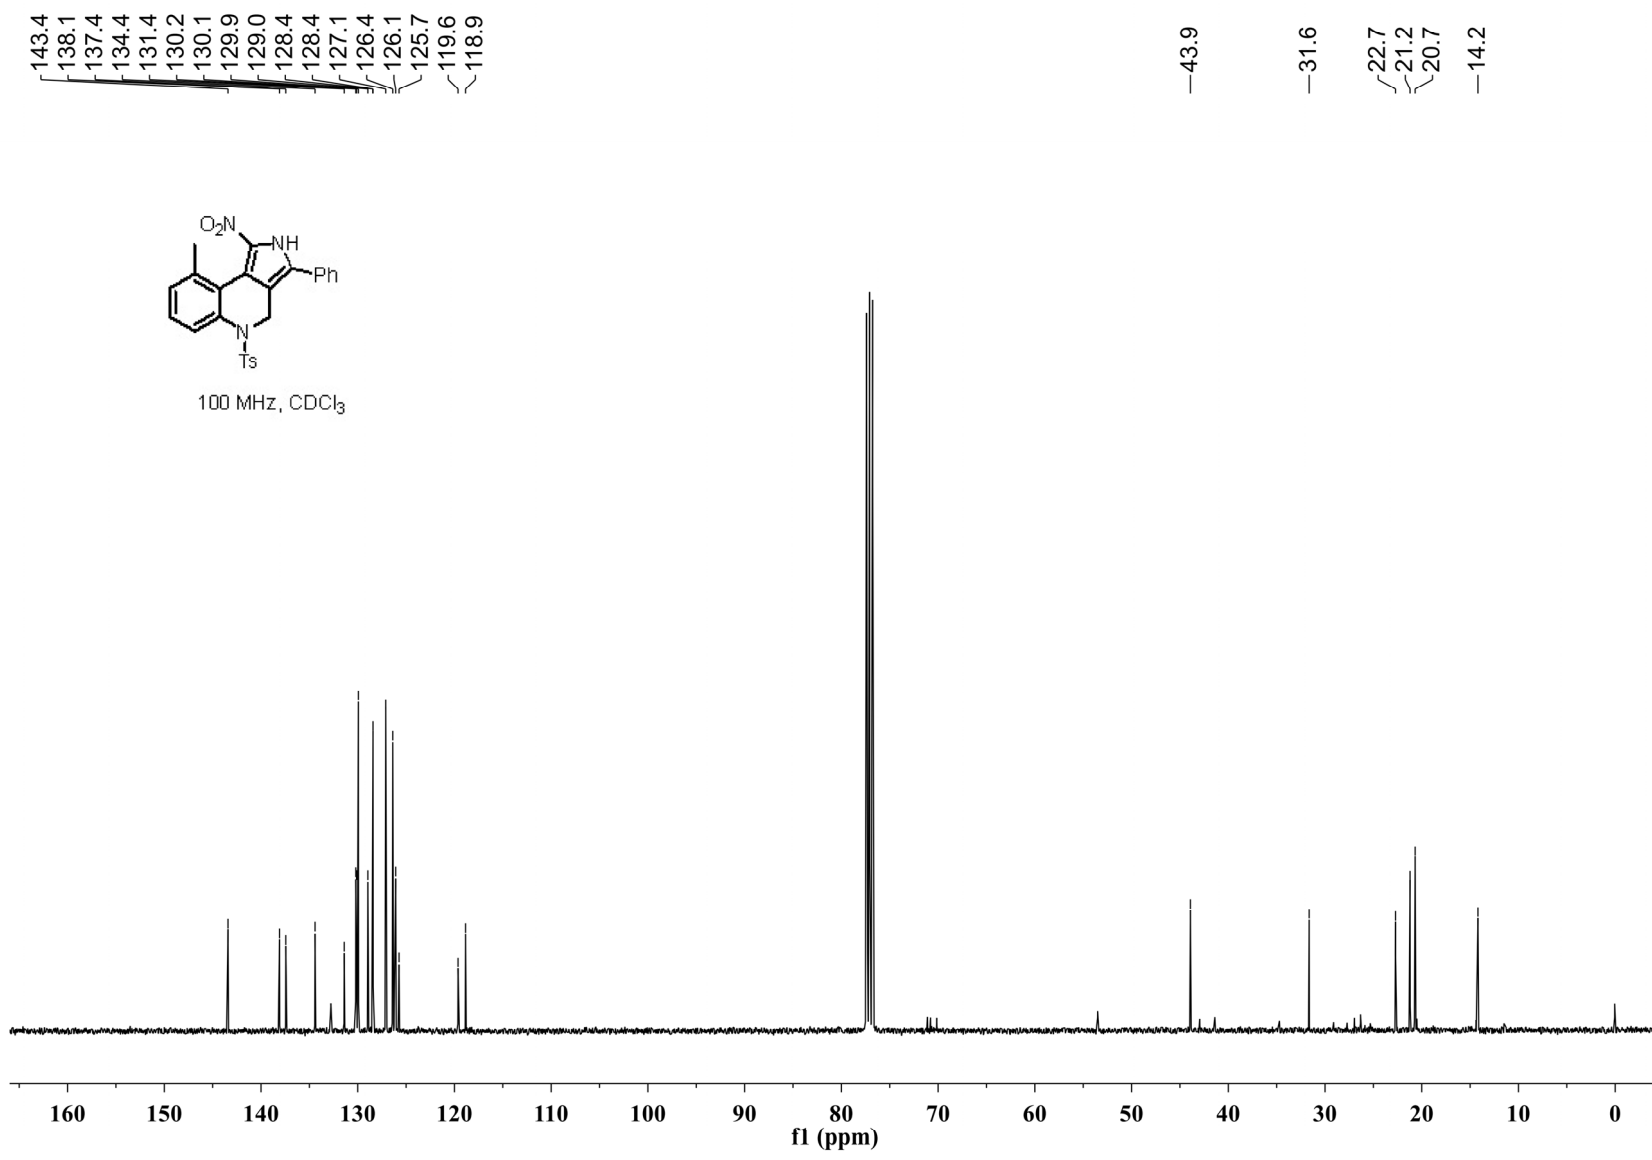

<sup>13</sup>C NMR Spectrum of Compound 3p

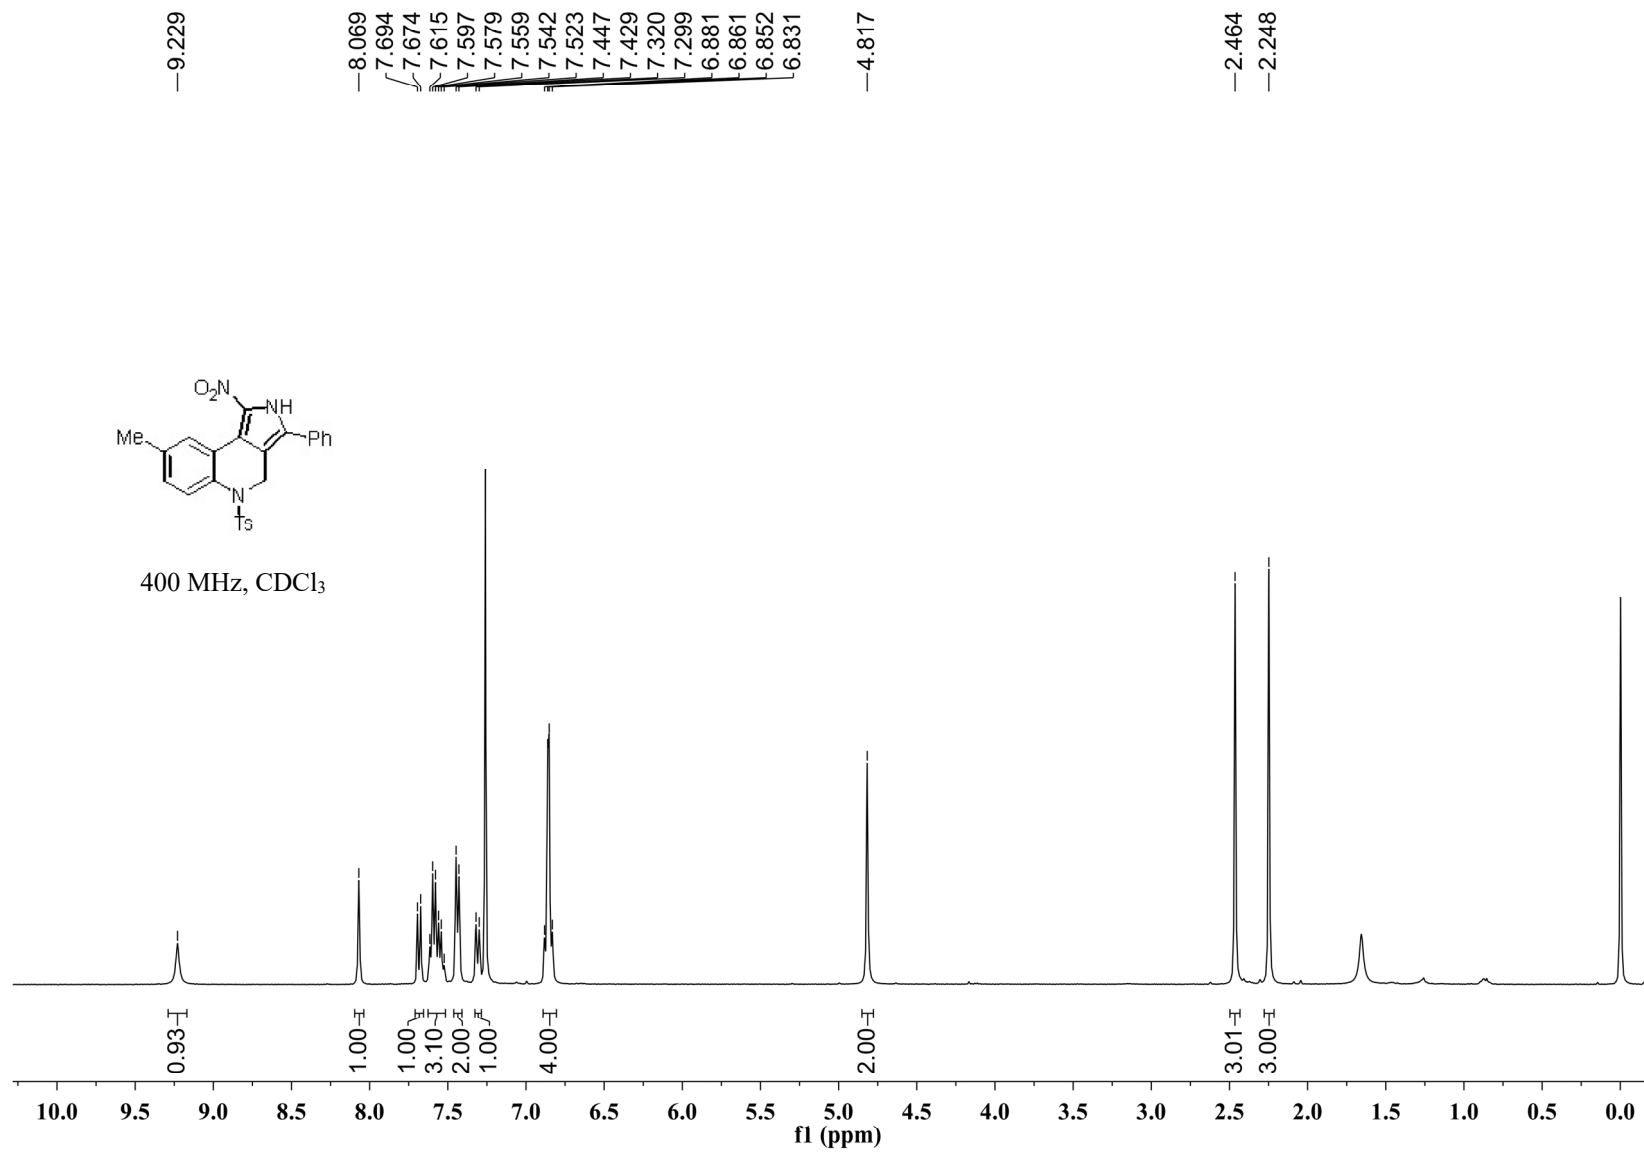

<sup>1</sup>H NMR Spectrum of Compound 3q

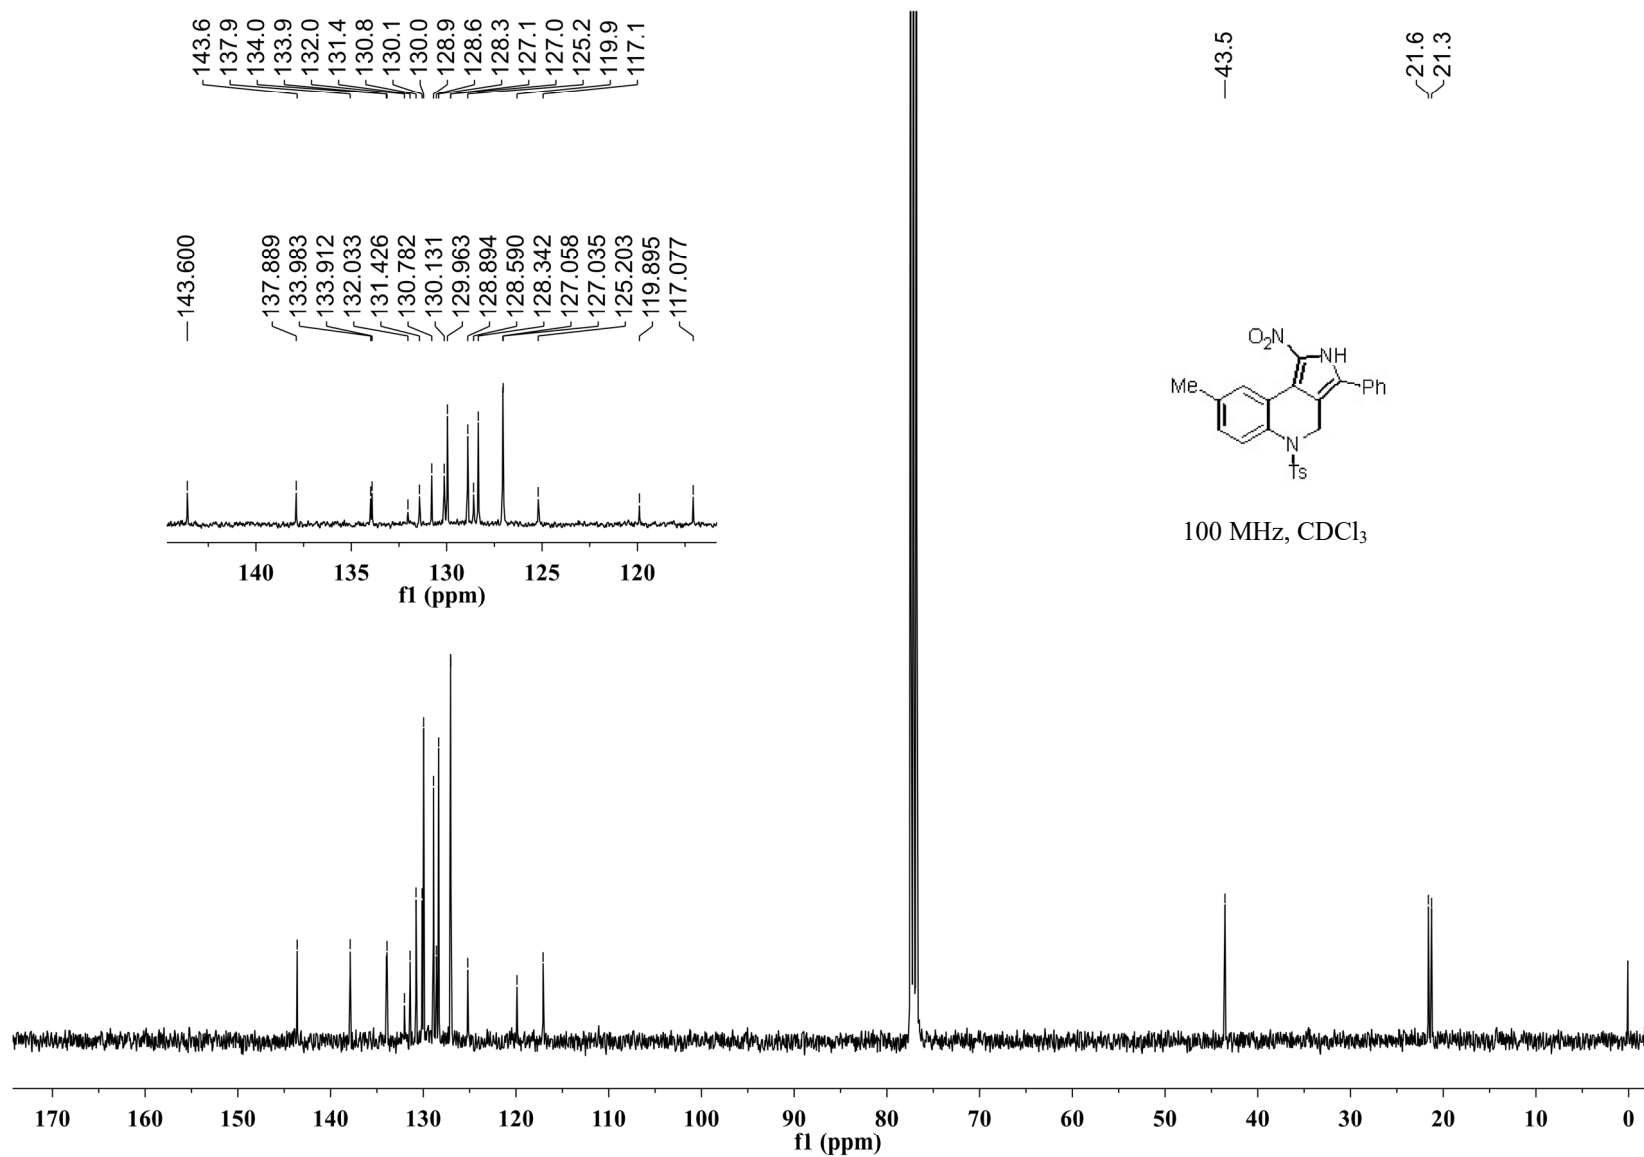

<sup>13</sup>C NMR Spectrum of Compound 3q

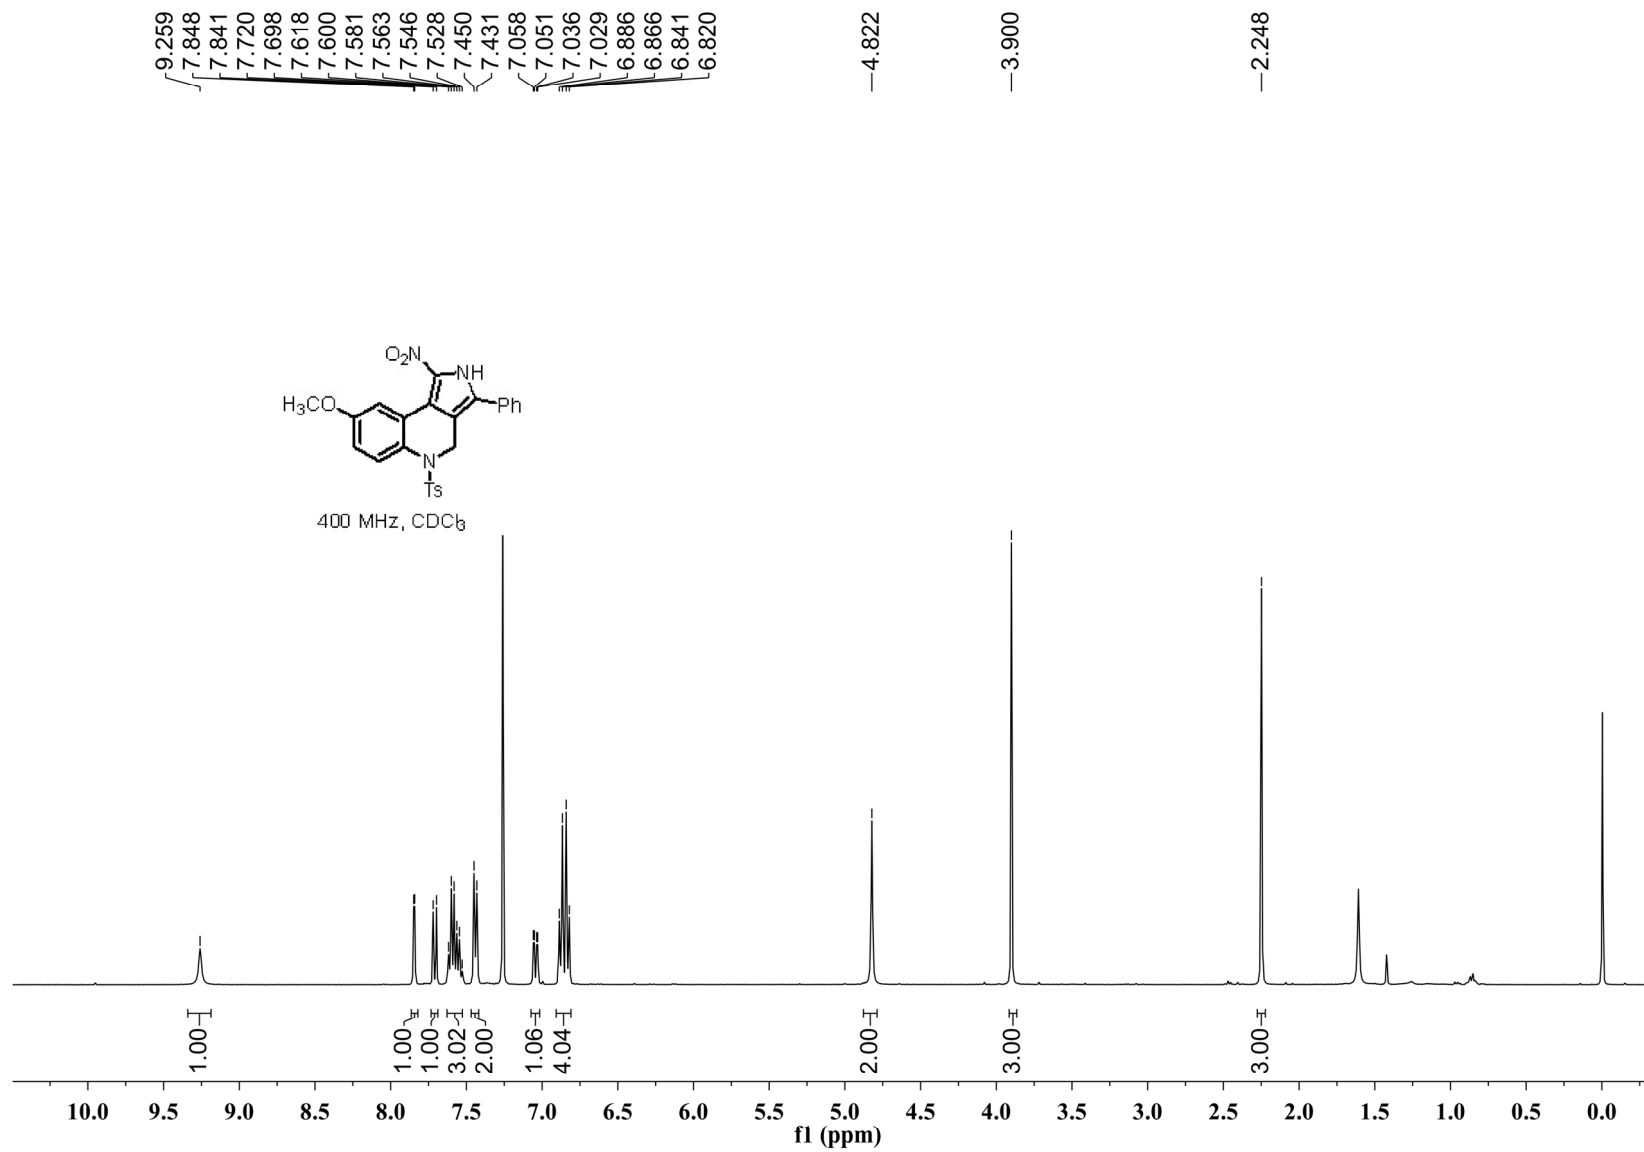

<sup>1</sup>H NMR Spectrum of Compound 3r

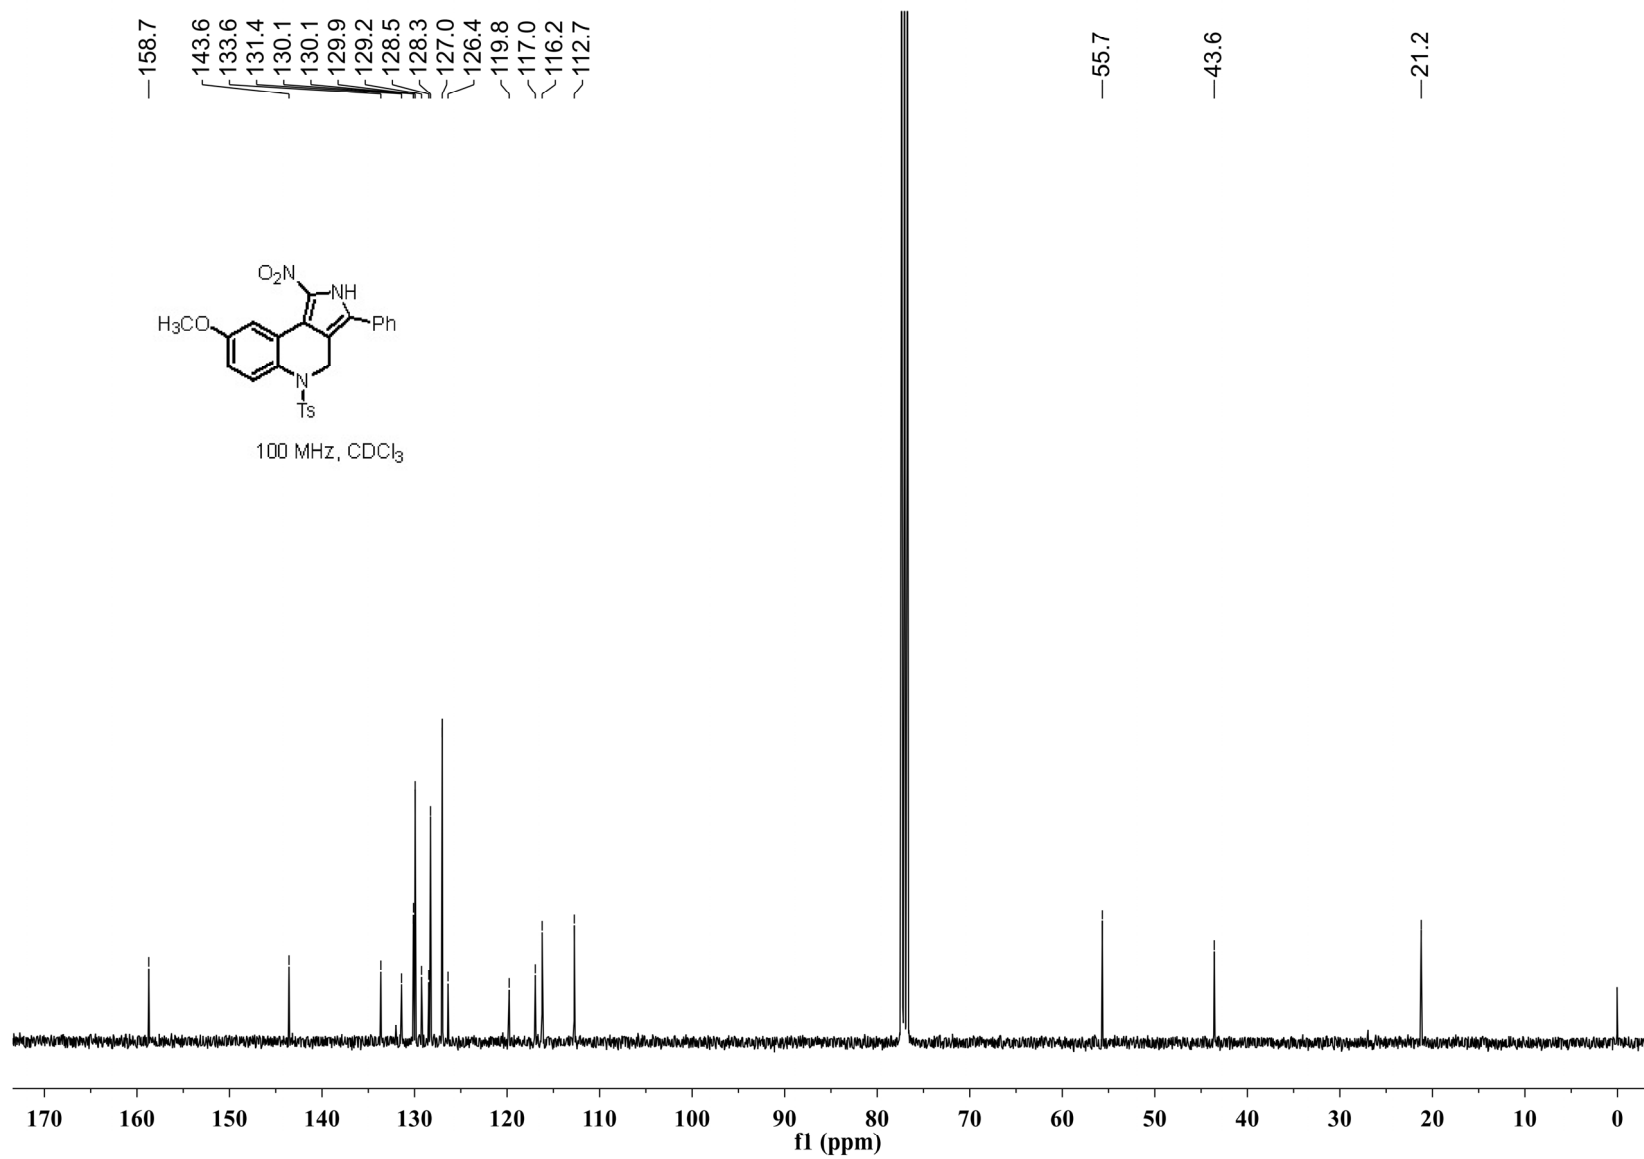

<sup>13</sup>C NMR Spectrum of Compound 3r



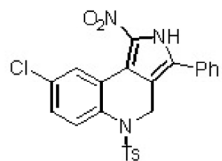

400 MHz, CDCl<sub>3</sub>

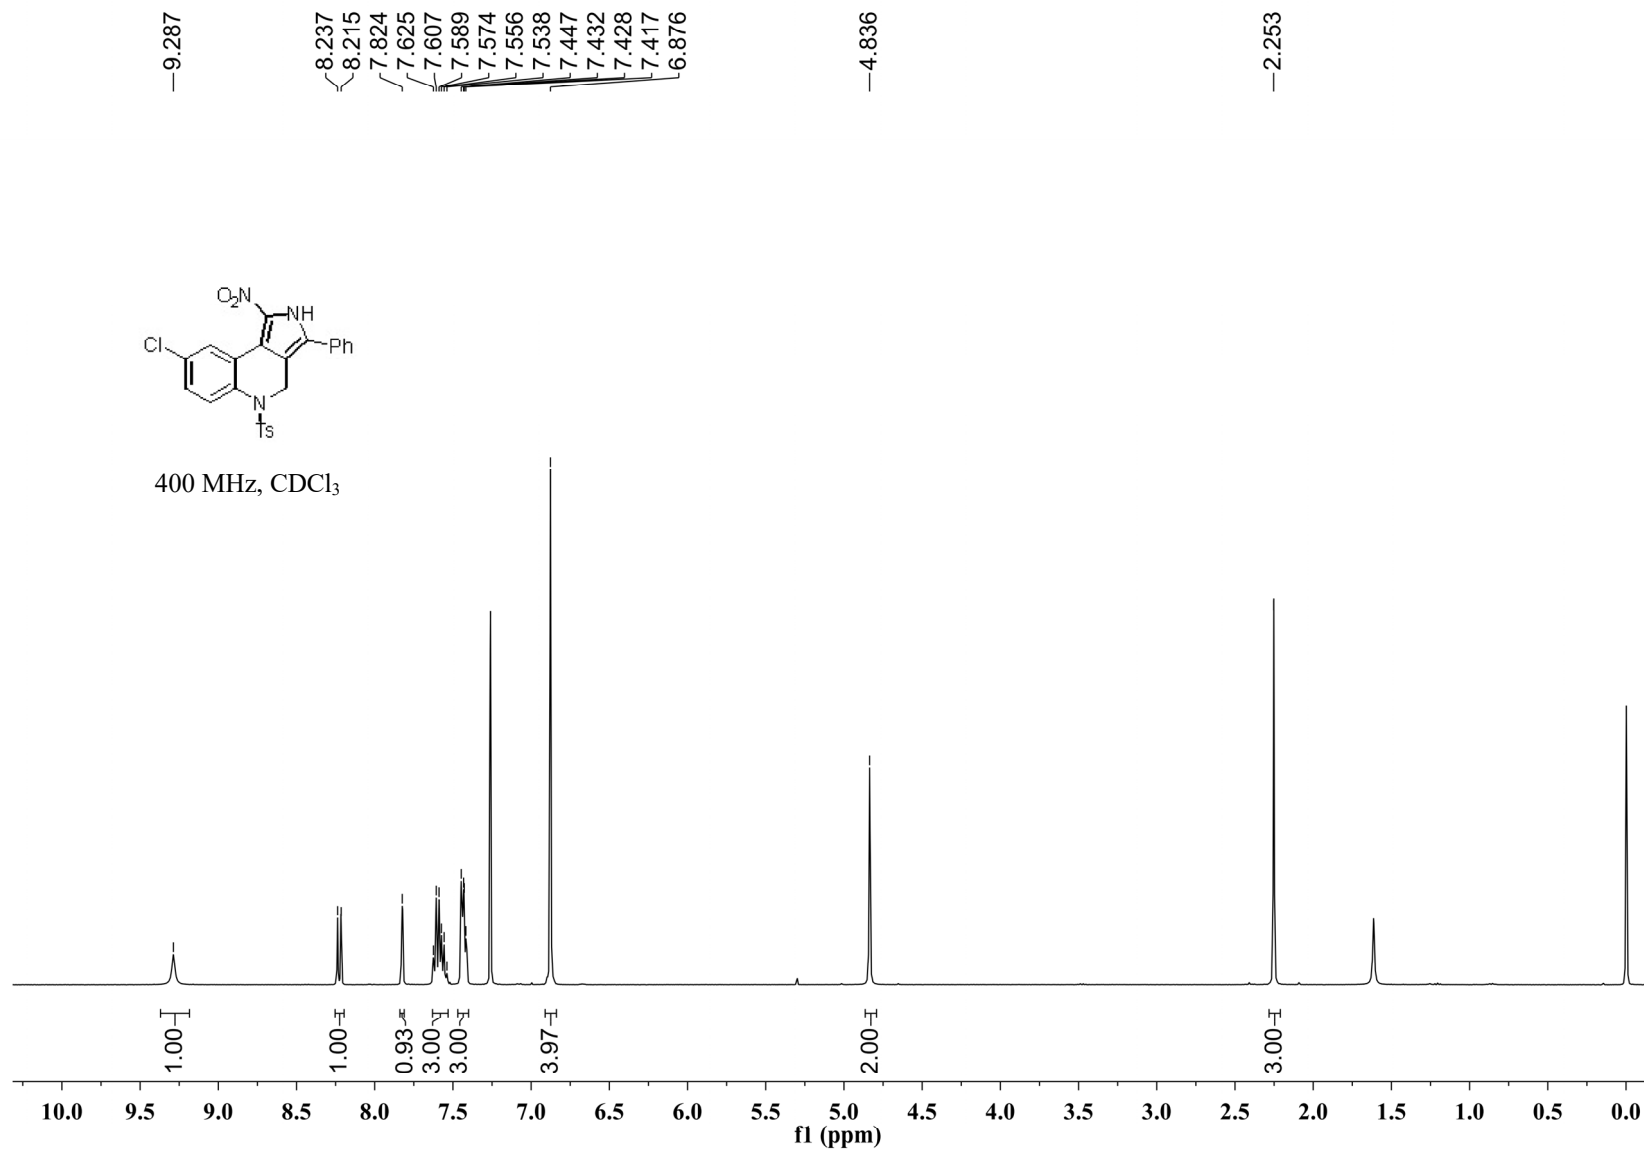

<sup>1</sup>H NMR Spectrum of Compound 3s

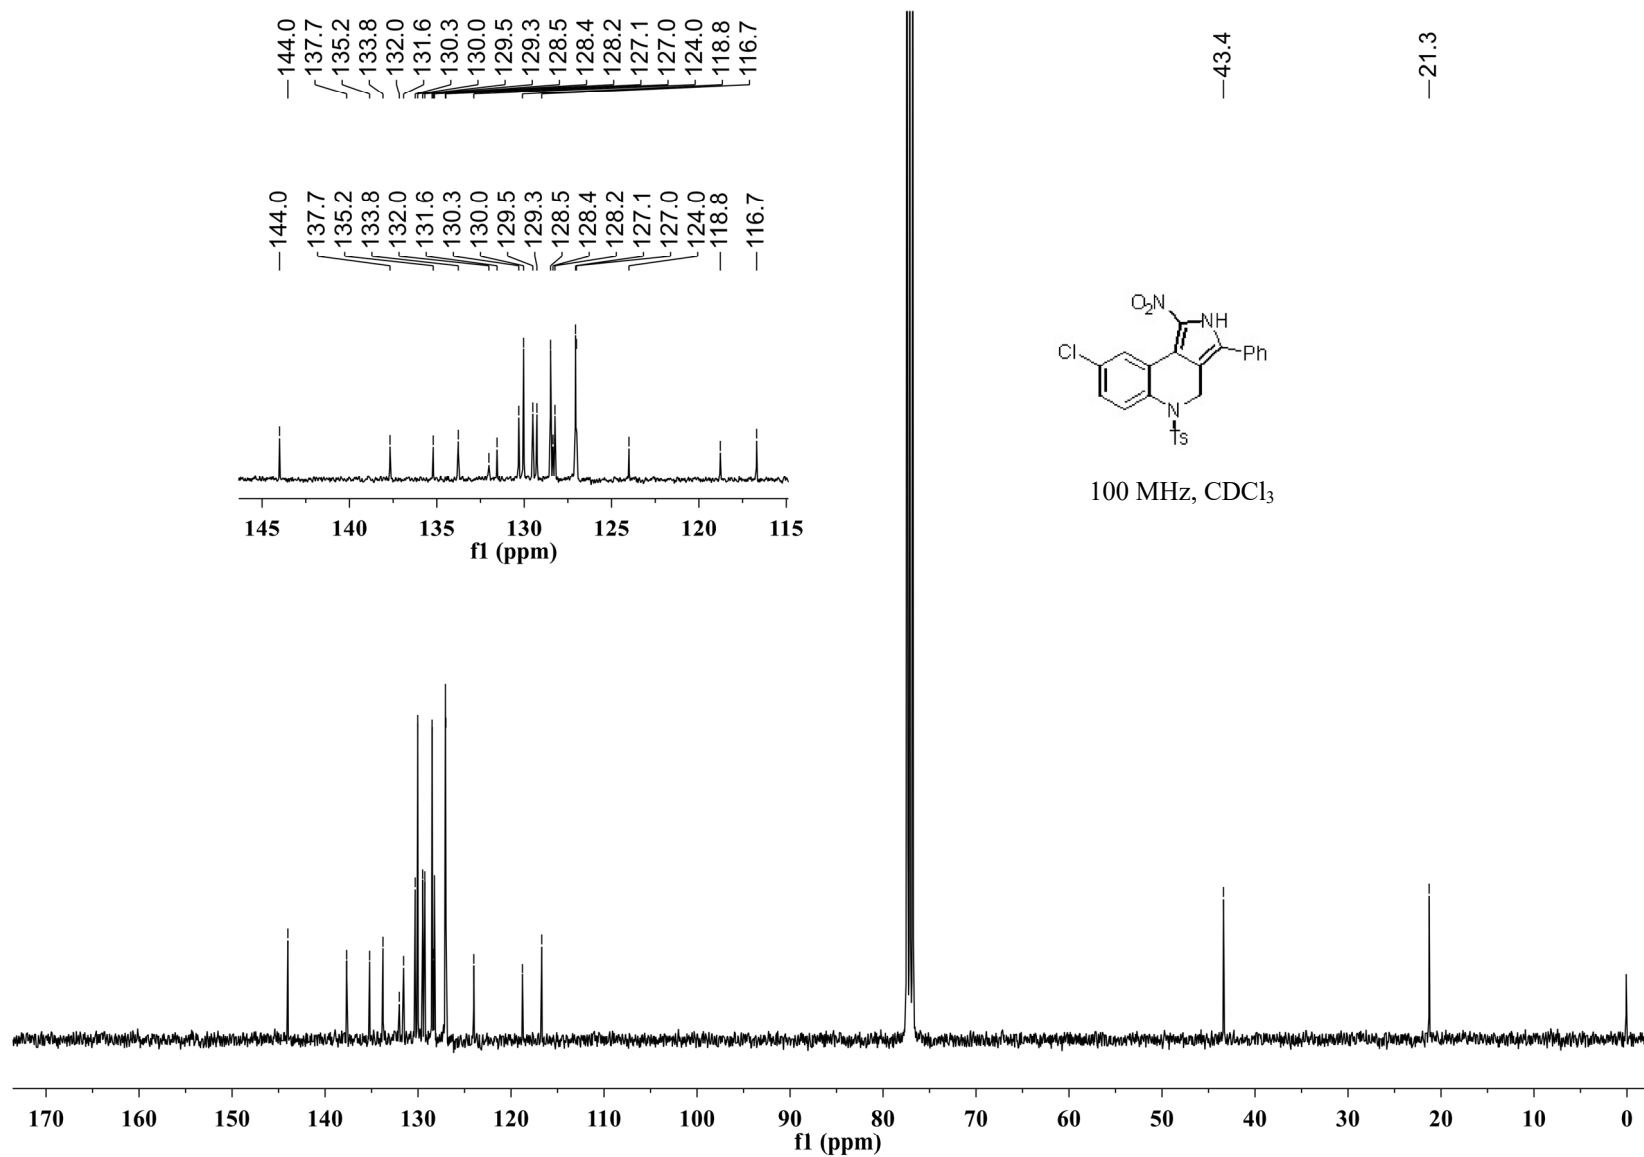

<sup>13</sup>C NMR Spectrum of Compound 3s

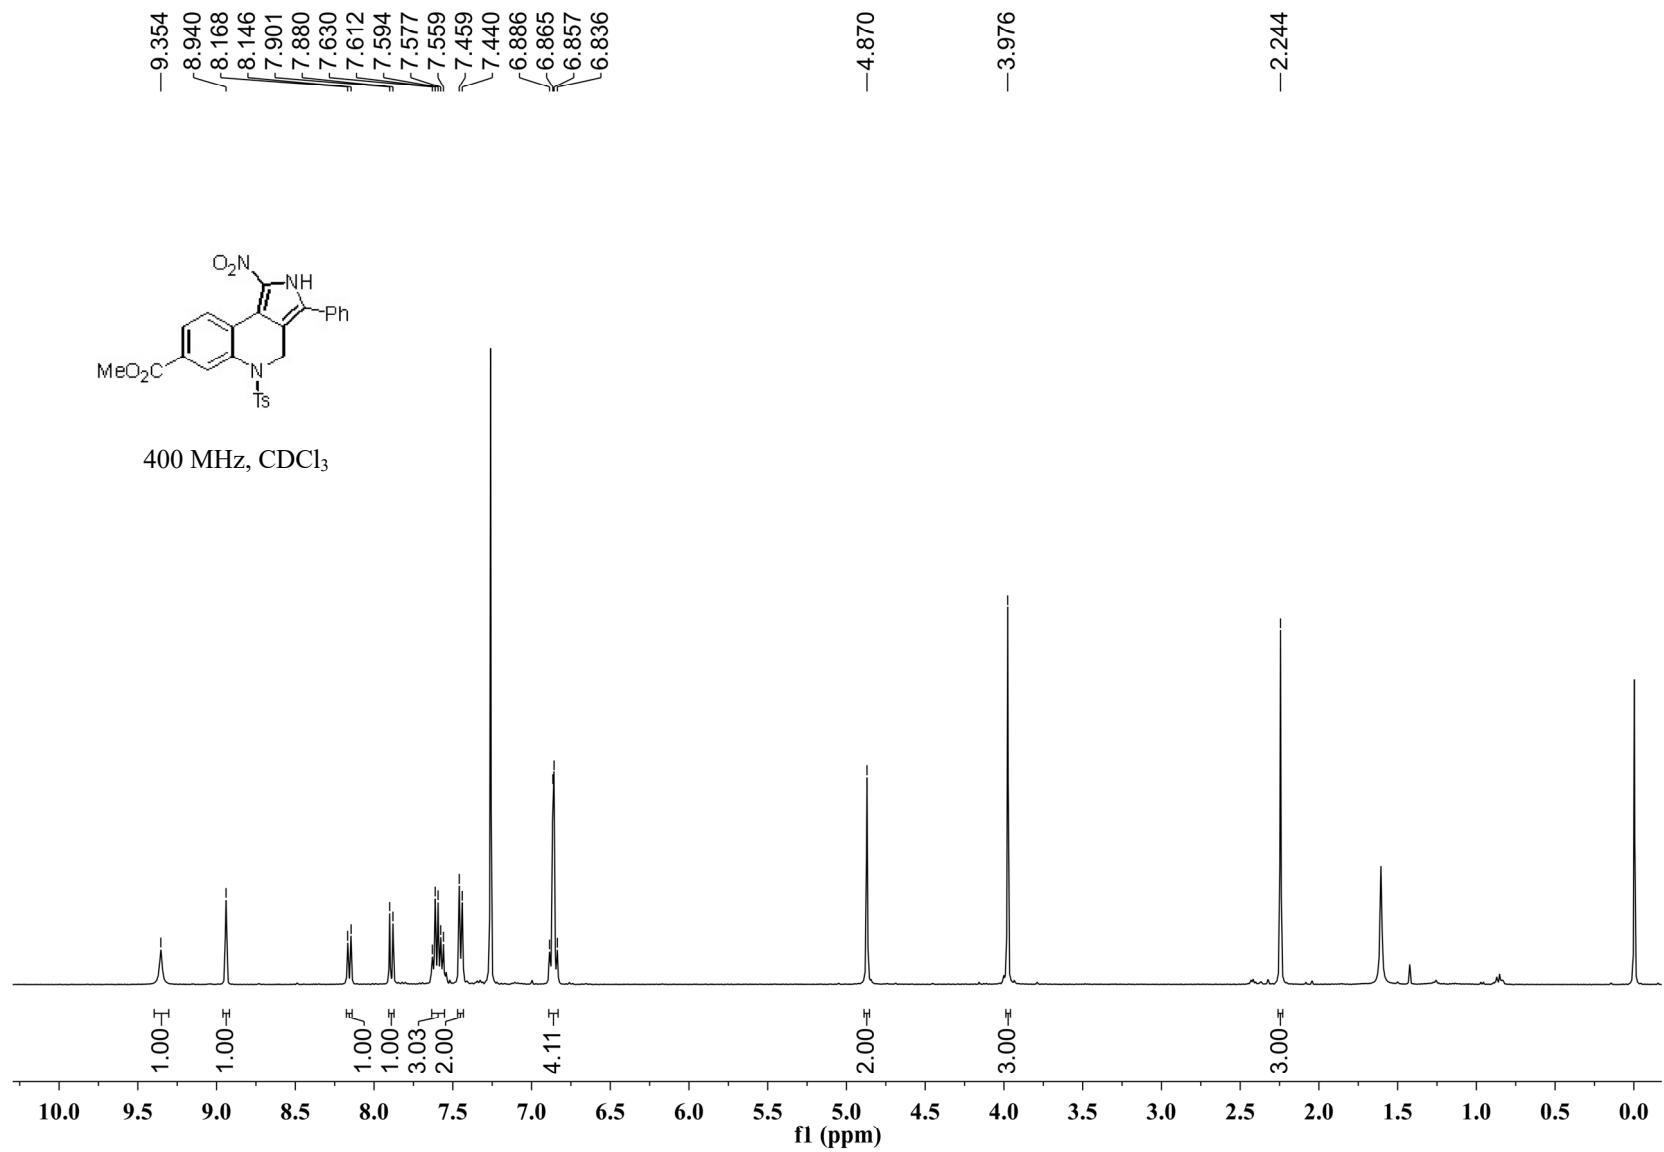

<sup>1</sup>H NMR Spectrum of Compound 3t

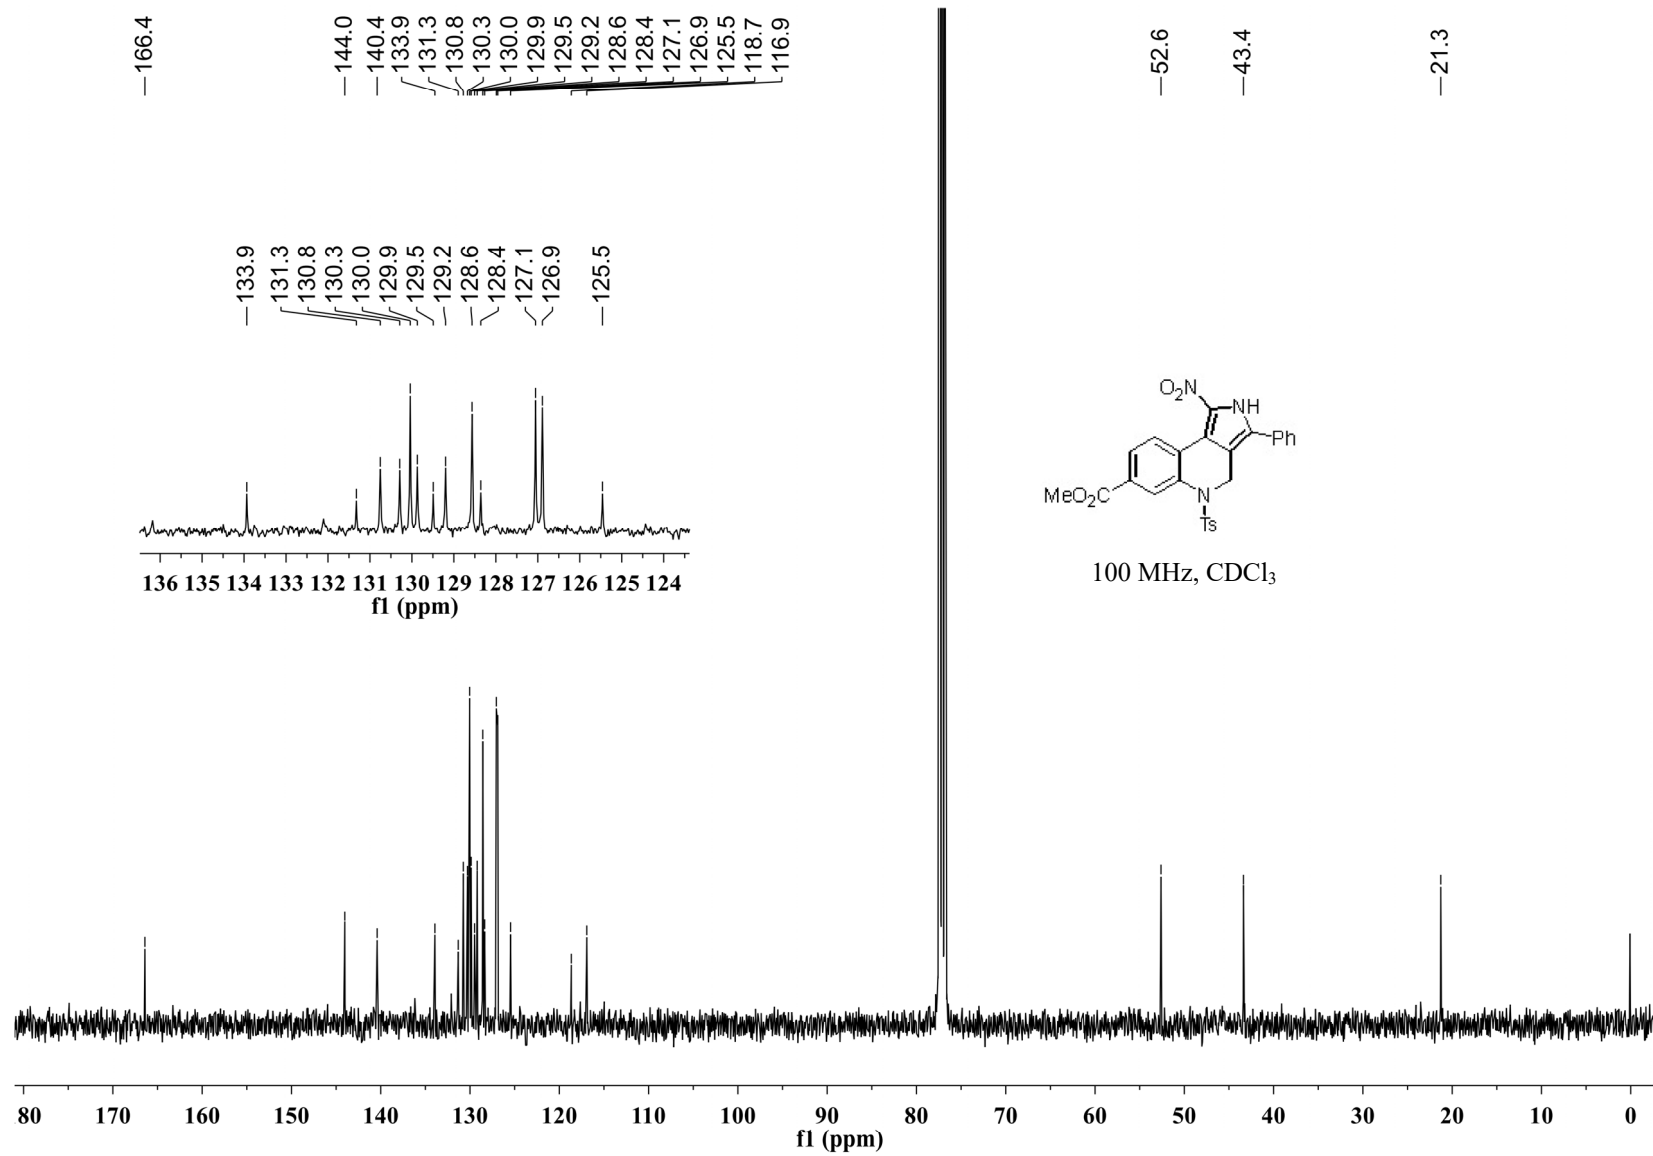

<sup>13</sup>C NMR Spectrum of Compound 3t

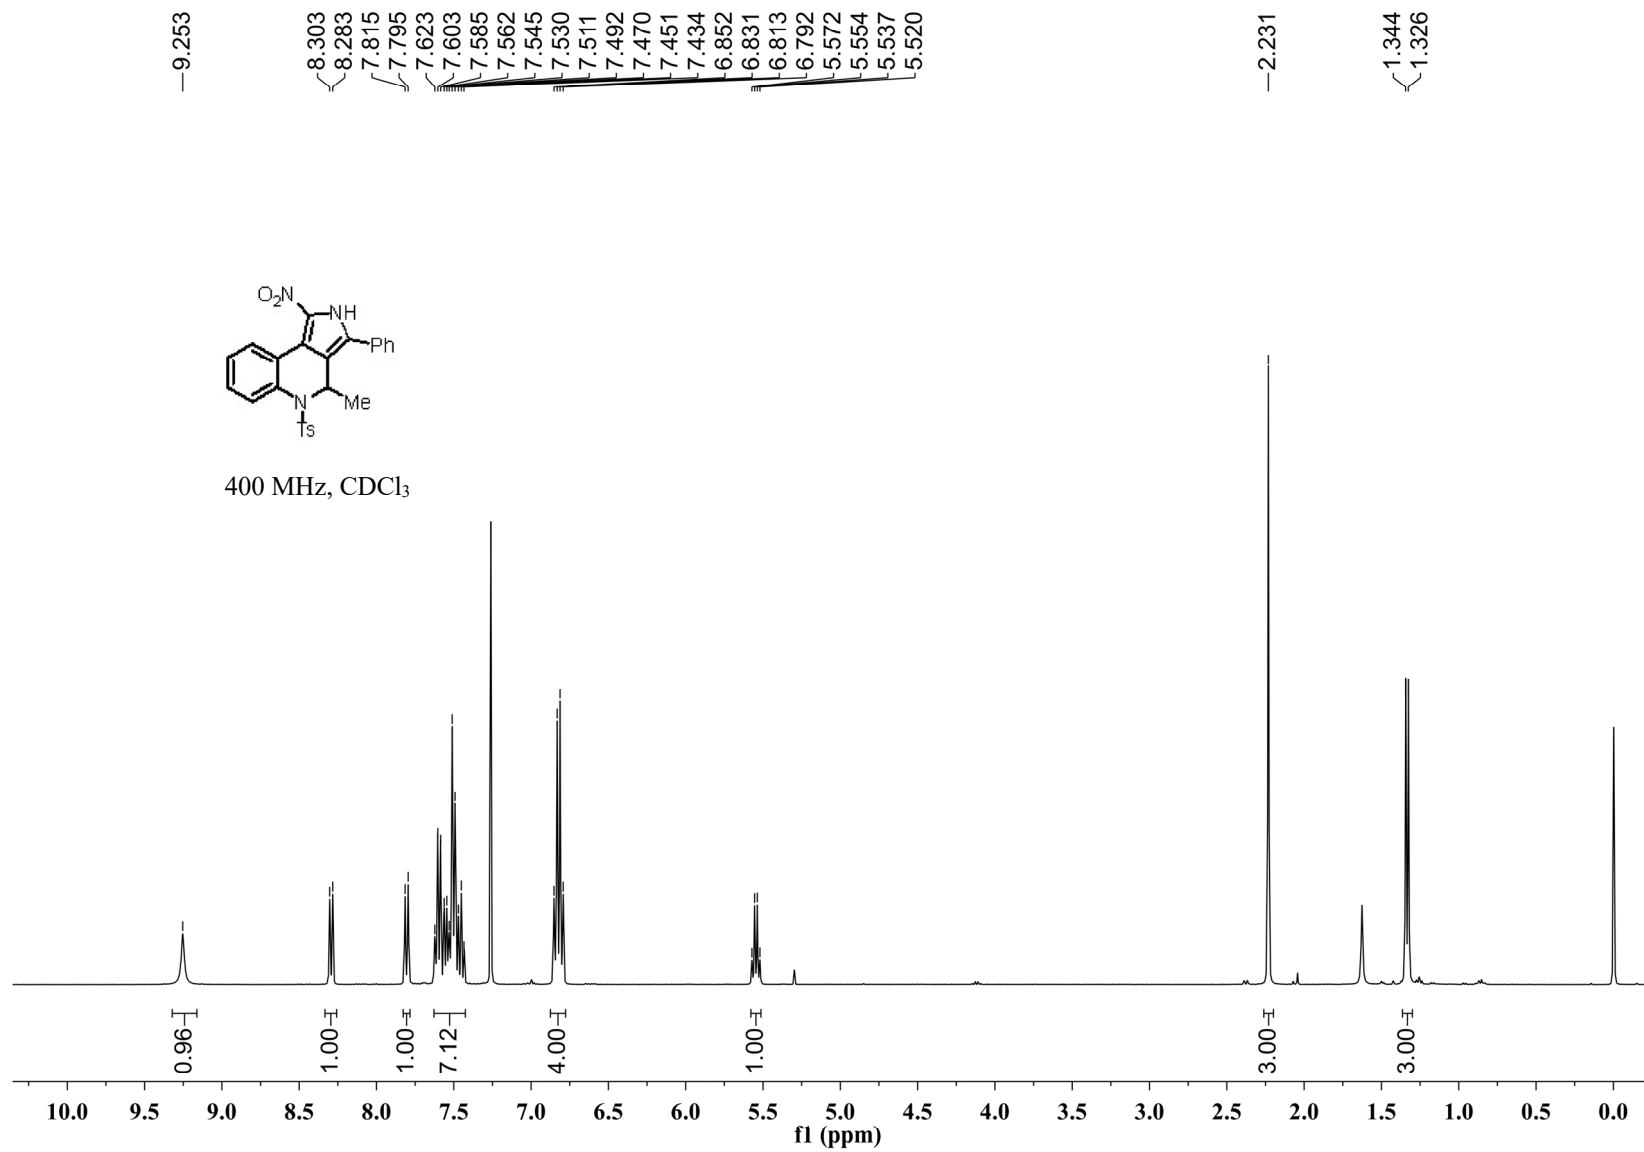

<sup>1</sup>H NMR Spectrum of Compound 3u

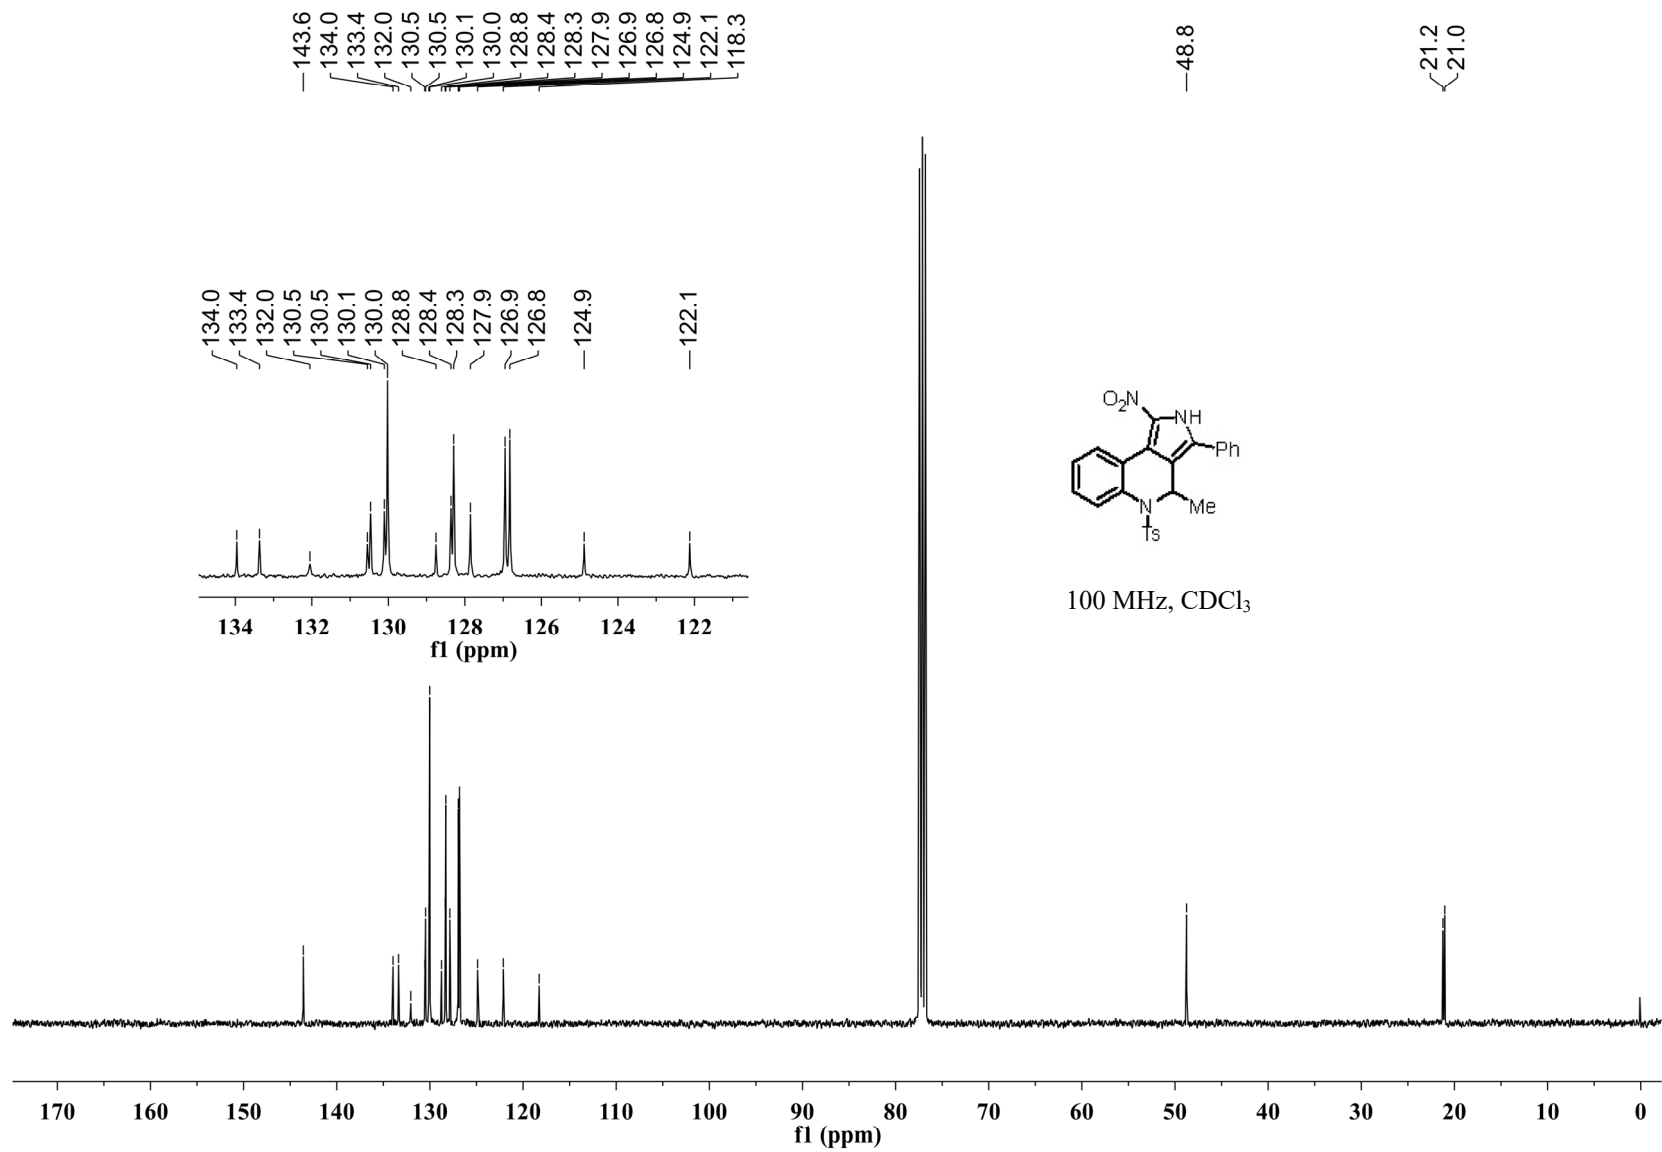

<sup>13</sup>C NMR Spectrum of Compound 3u

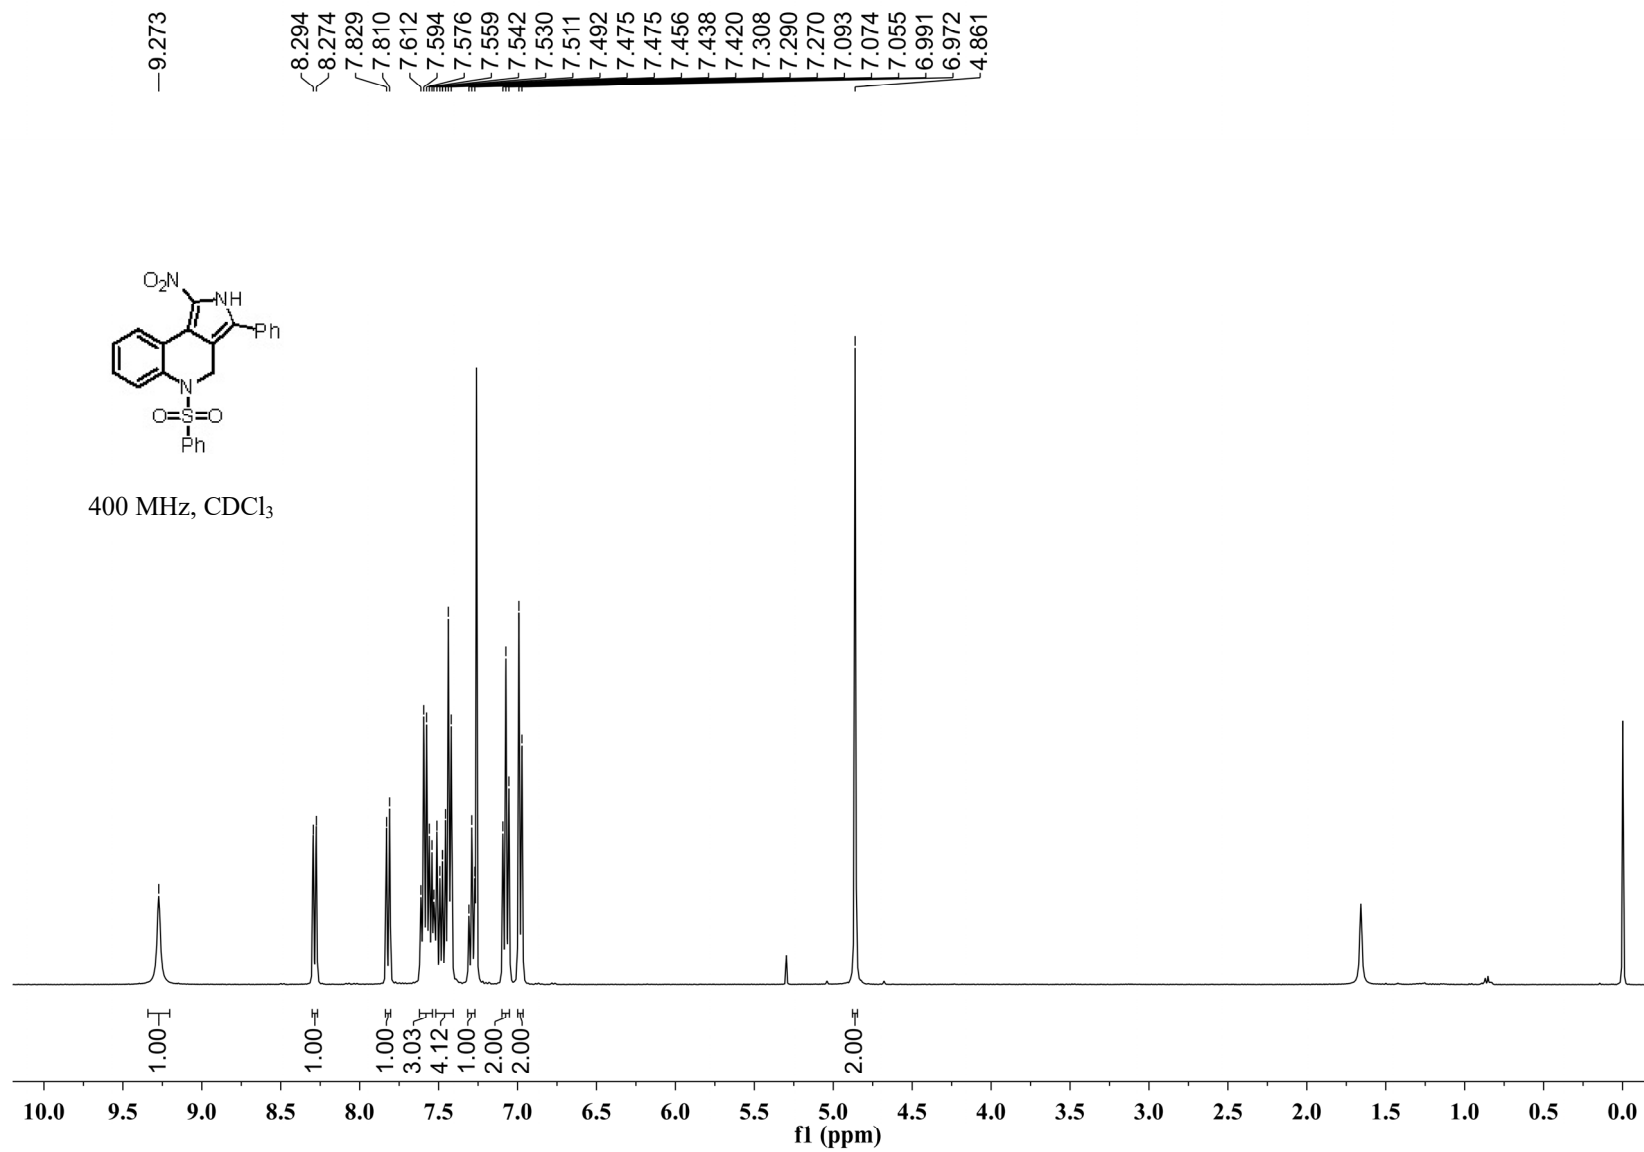

<sup>1</sup>H NMR Spectrum of Compound 3v

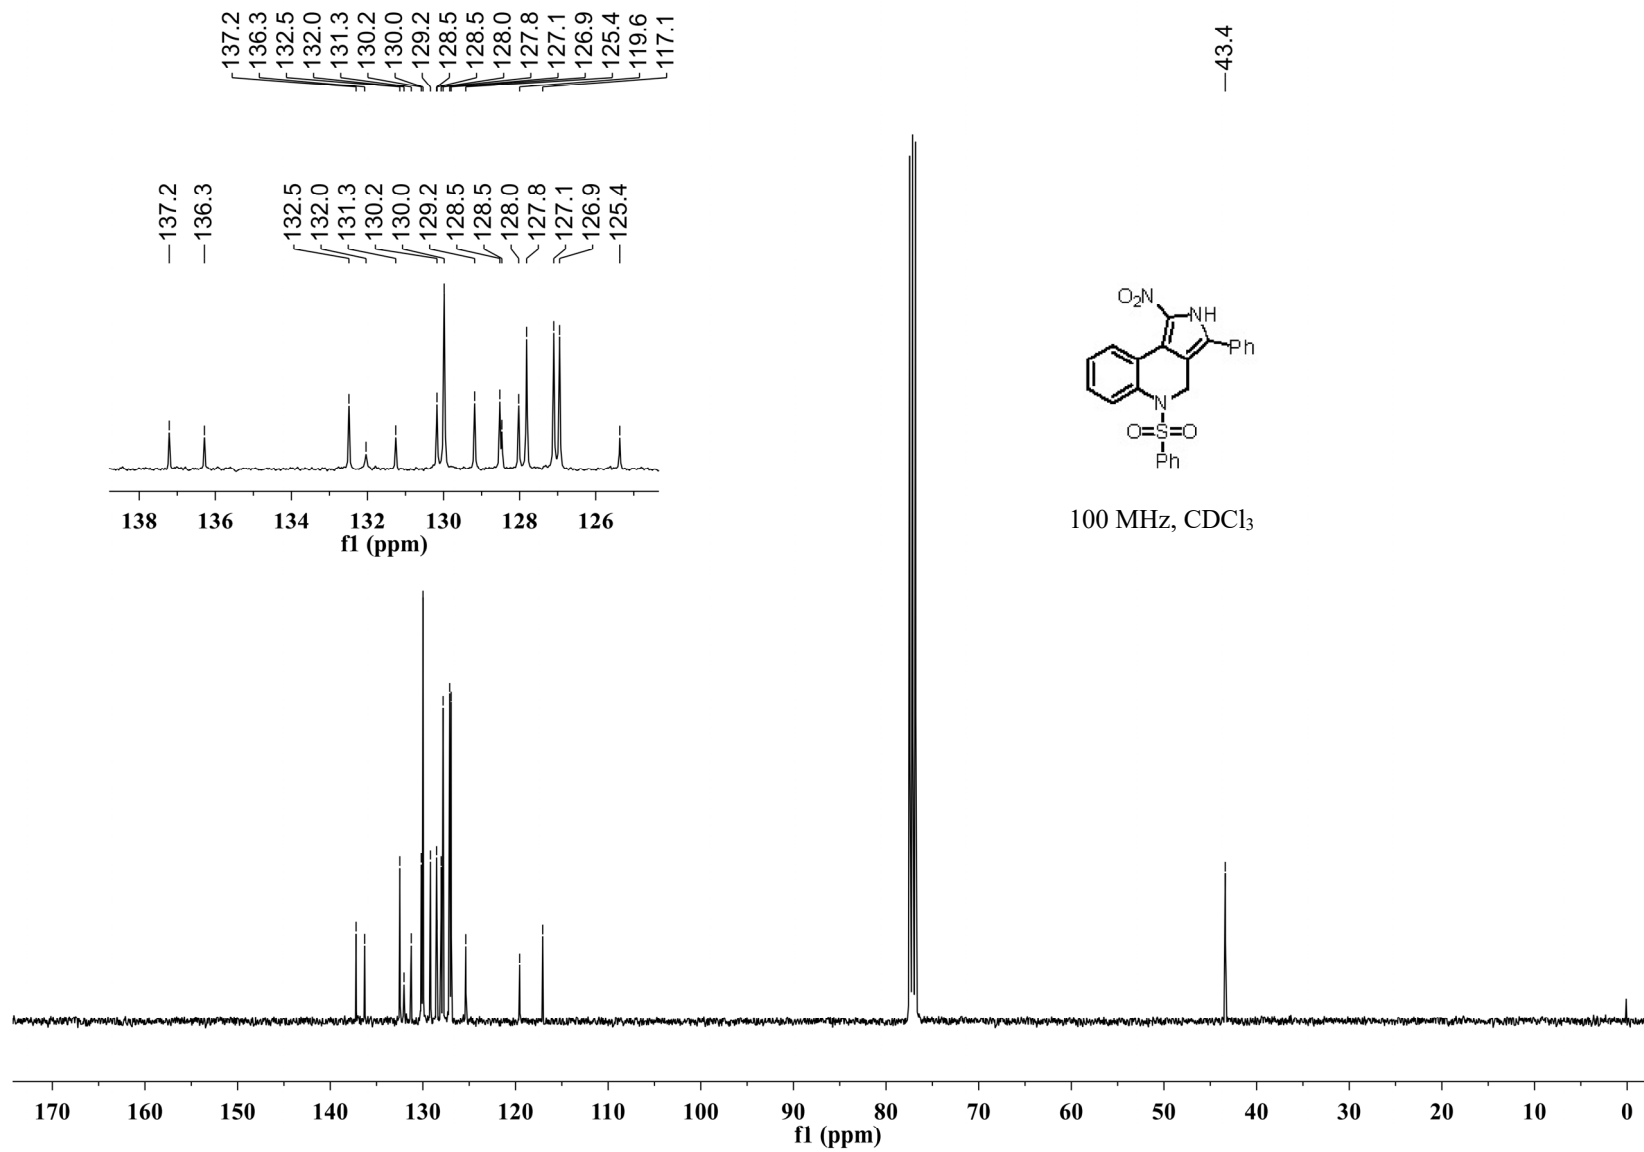

<sup>13</sup>C NMR Spectrum of Compound 3v



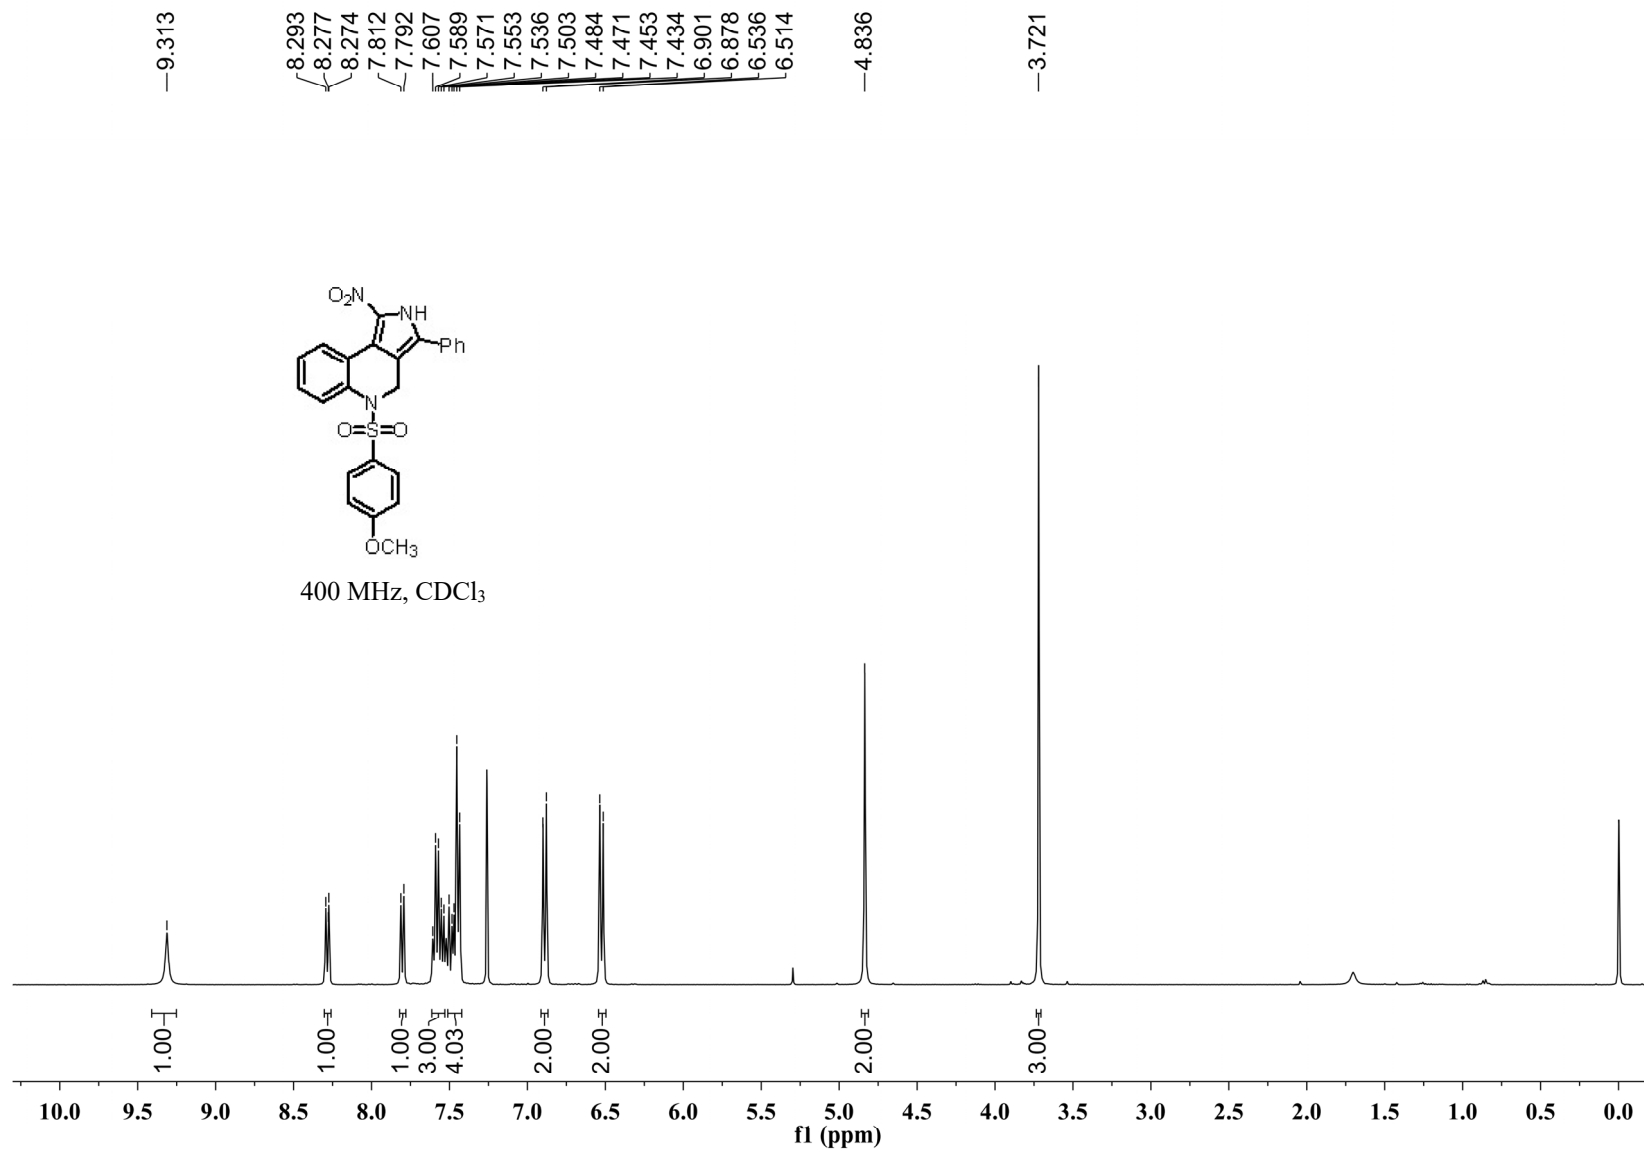

<sup>1</sup>H NMR Spectrum of Compound 3w

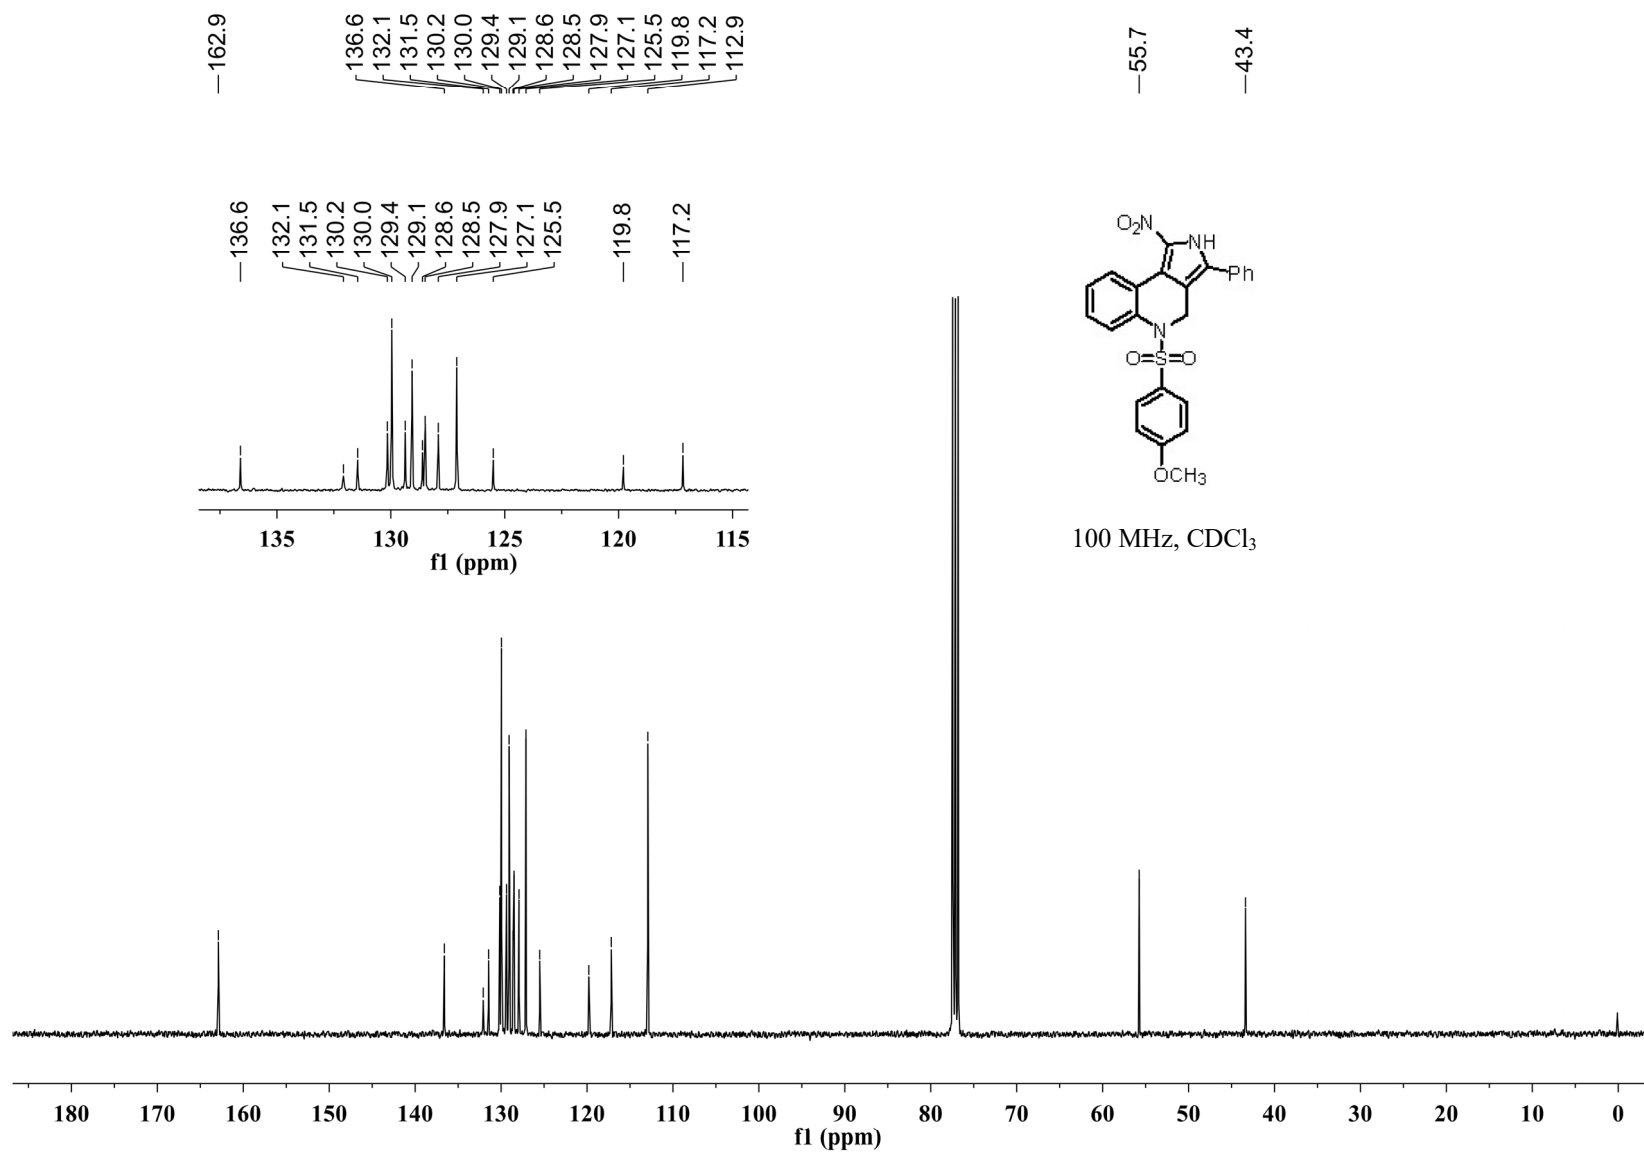

<sup>13</sup>C NMR Spectrum of Compound 3w

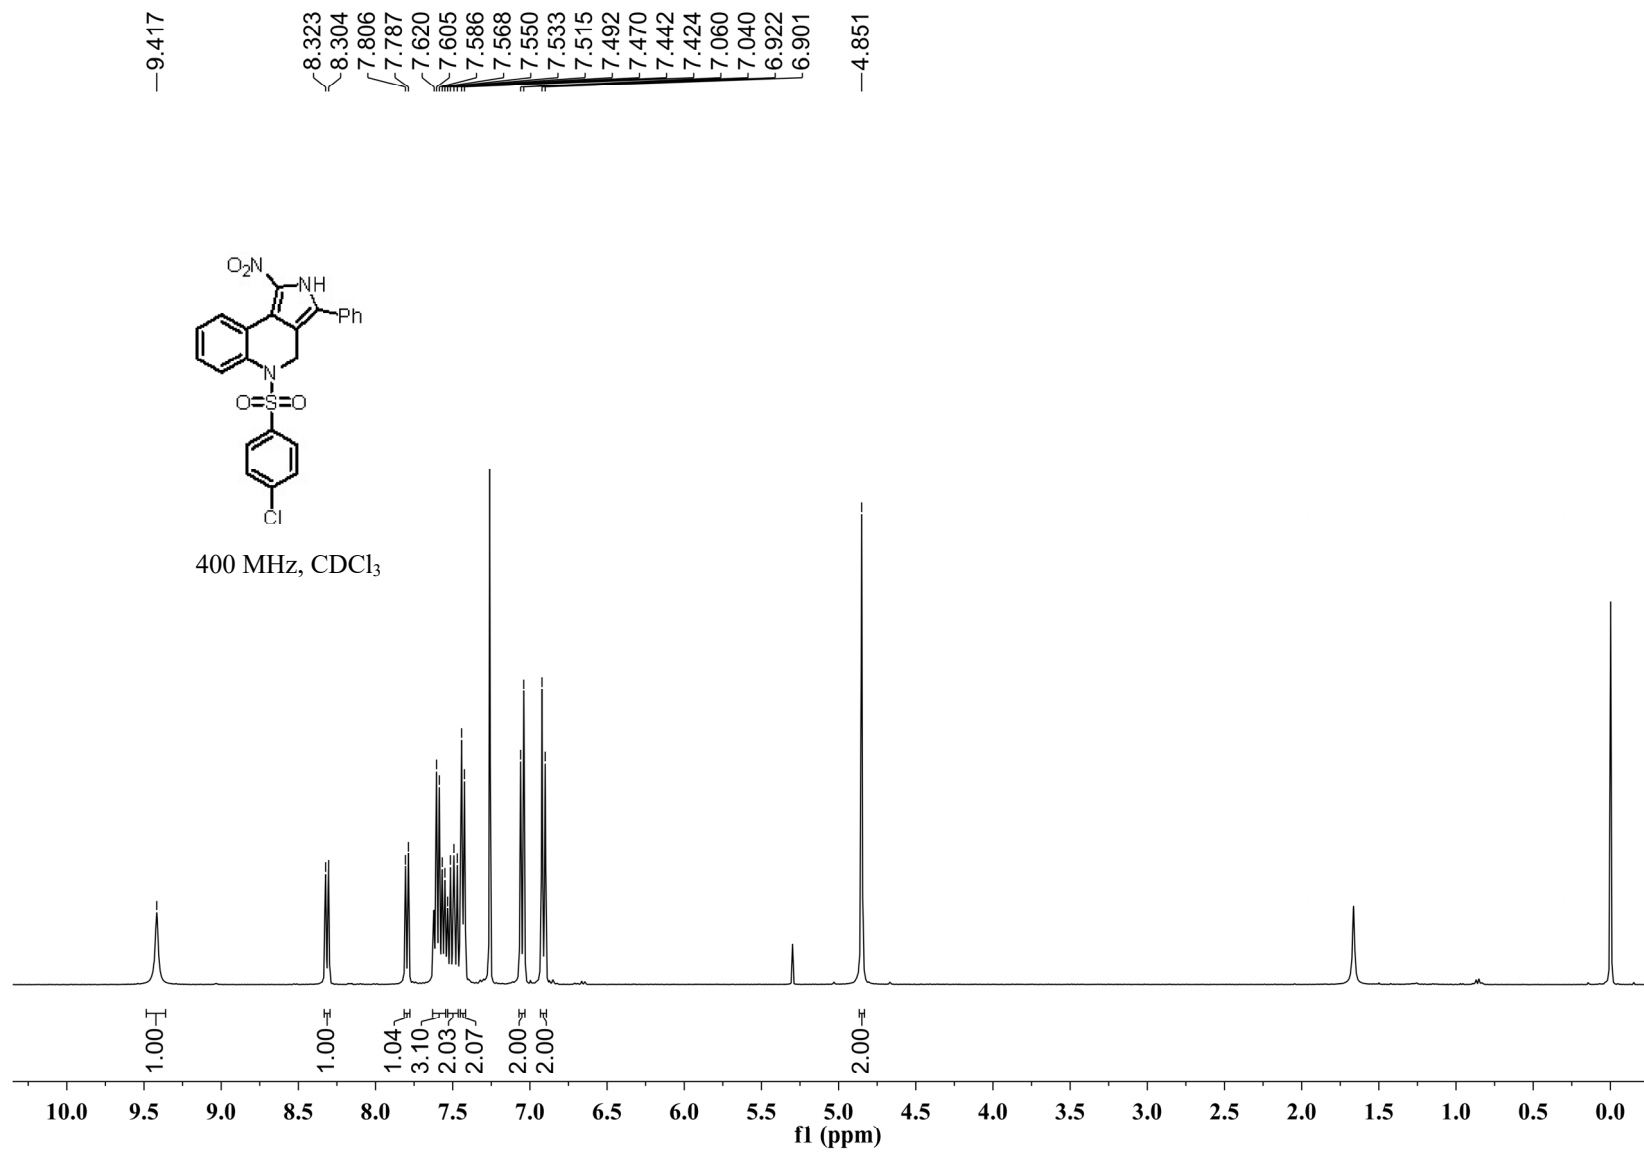

<sup>1</sup>H NMR Spectrum of Compound 3x

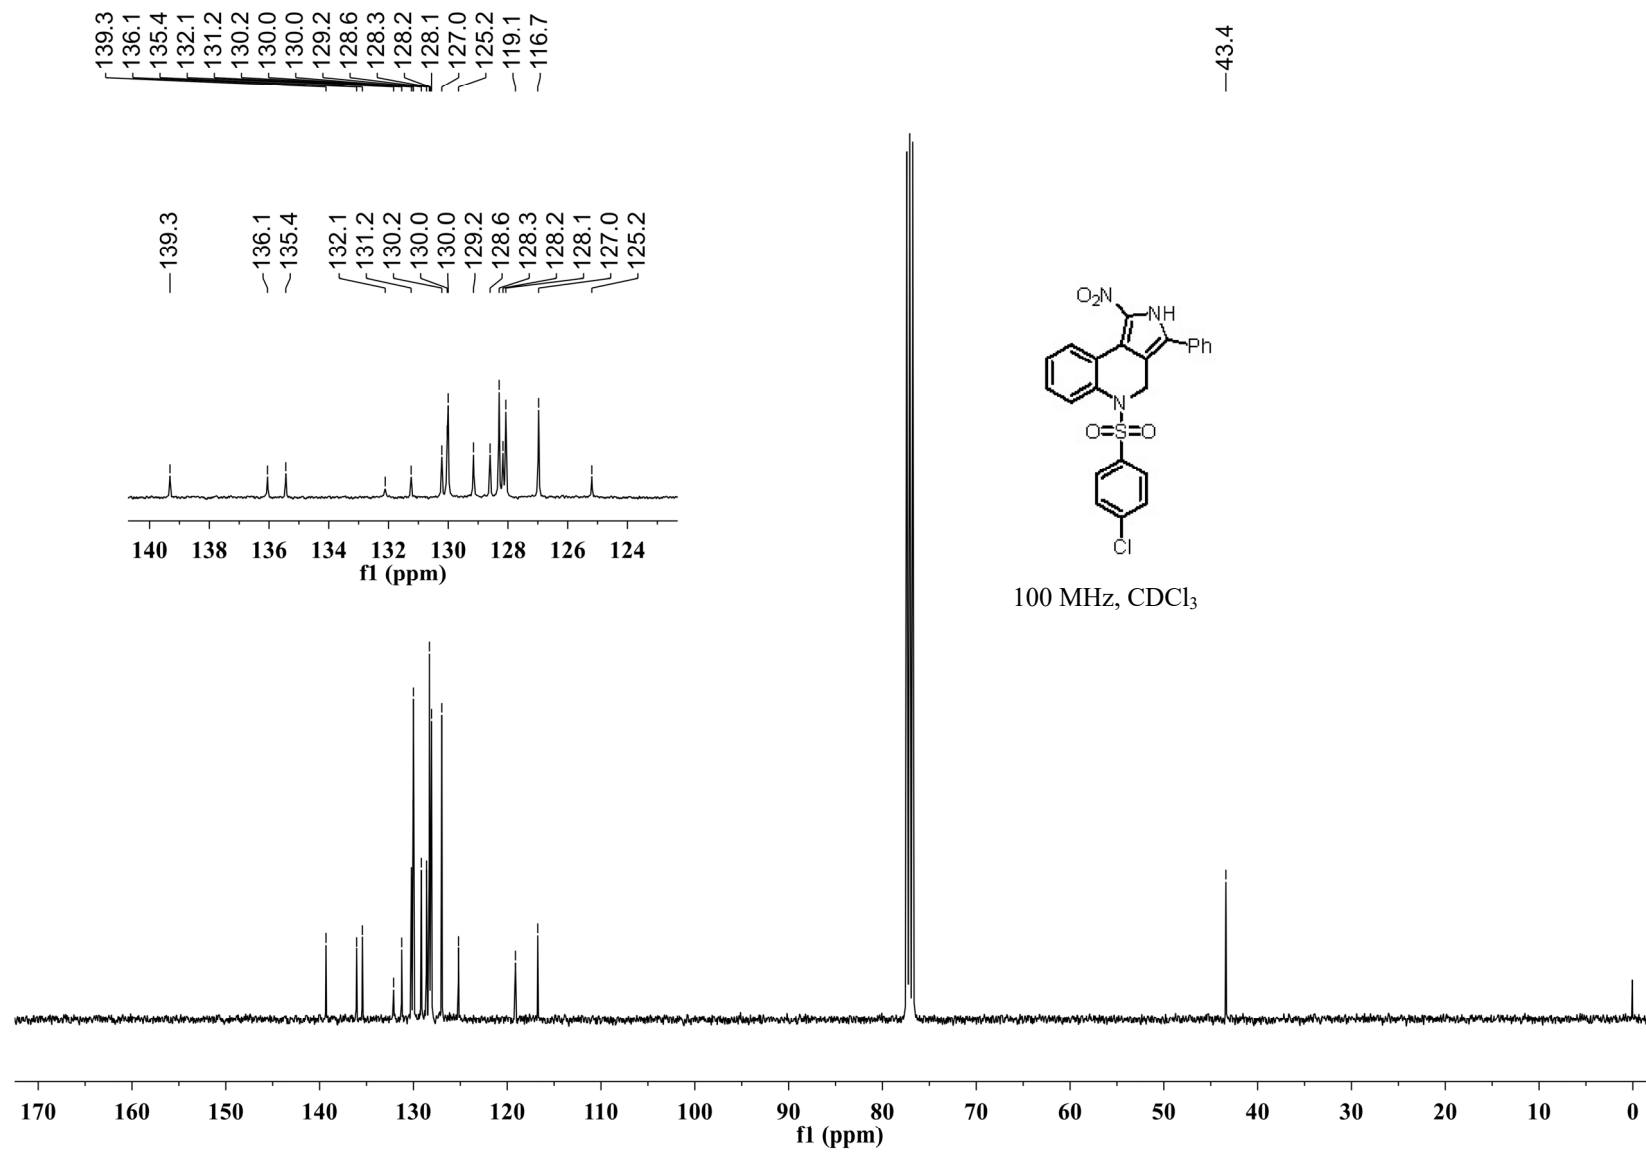

<sup>13</sup>C NMR Spectrum of Compound 3x

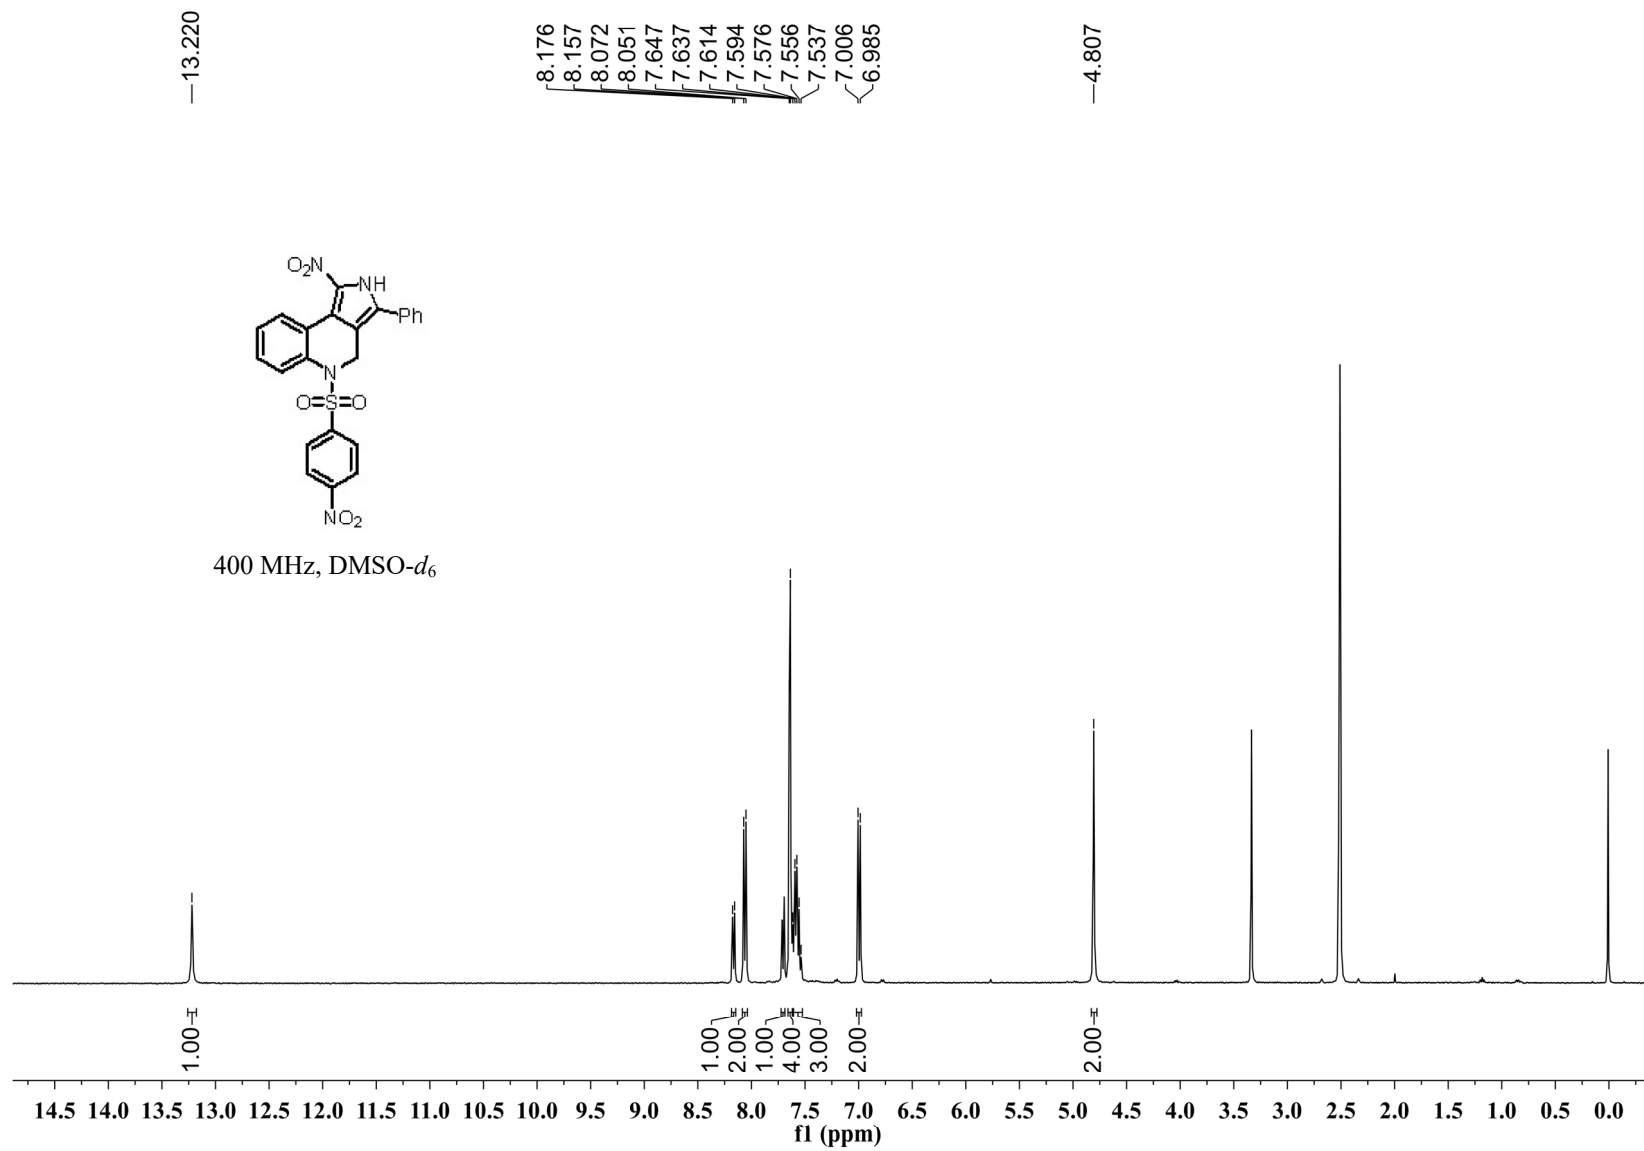

<sup>1</sup>H NMR Spectrum of Compound 3y

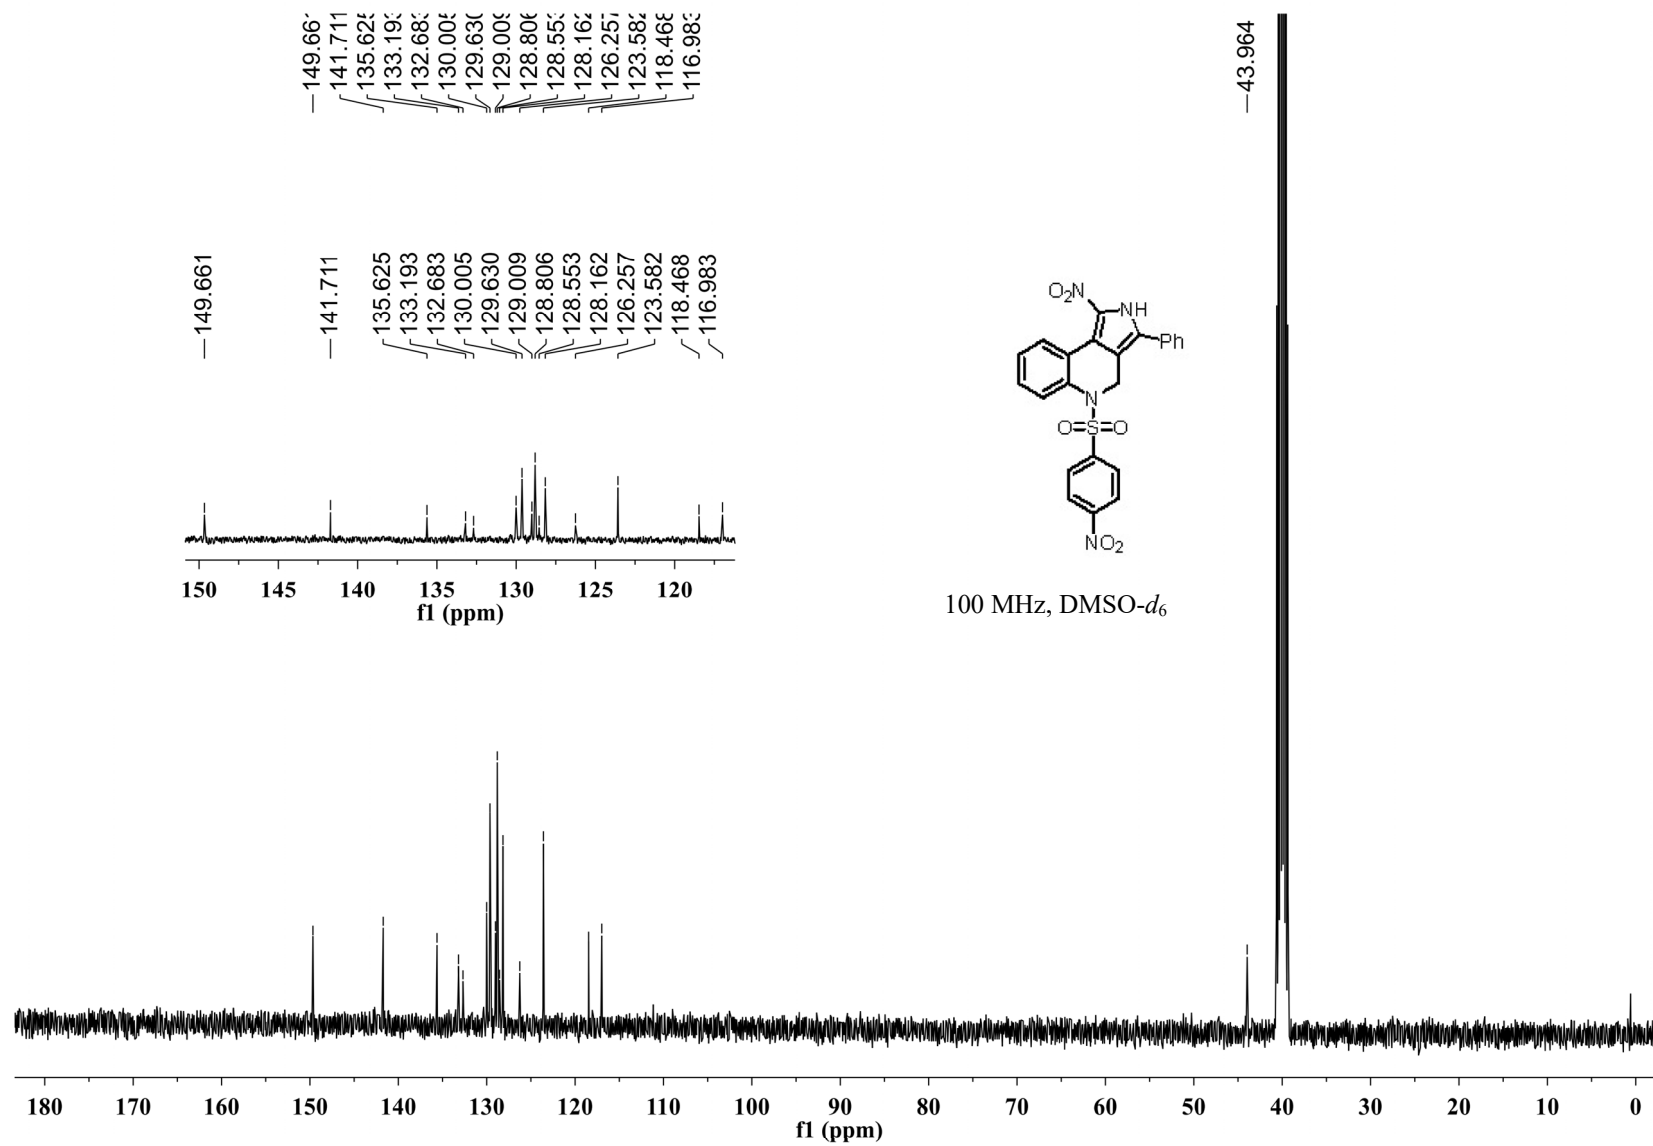

**<sup>13</sup>C NMR Spectrum of Compound 3y**

—13.349

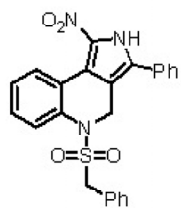

400 MHz, DMSO-*d*<sub>6</sub>

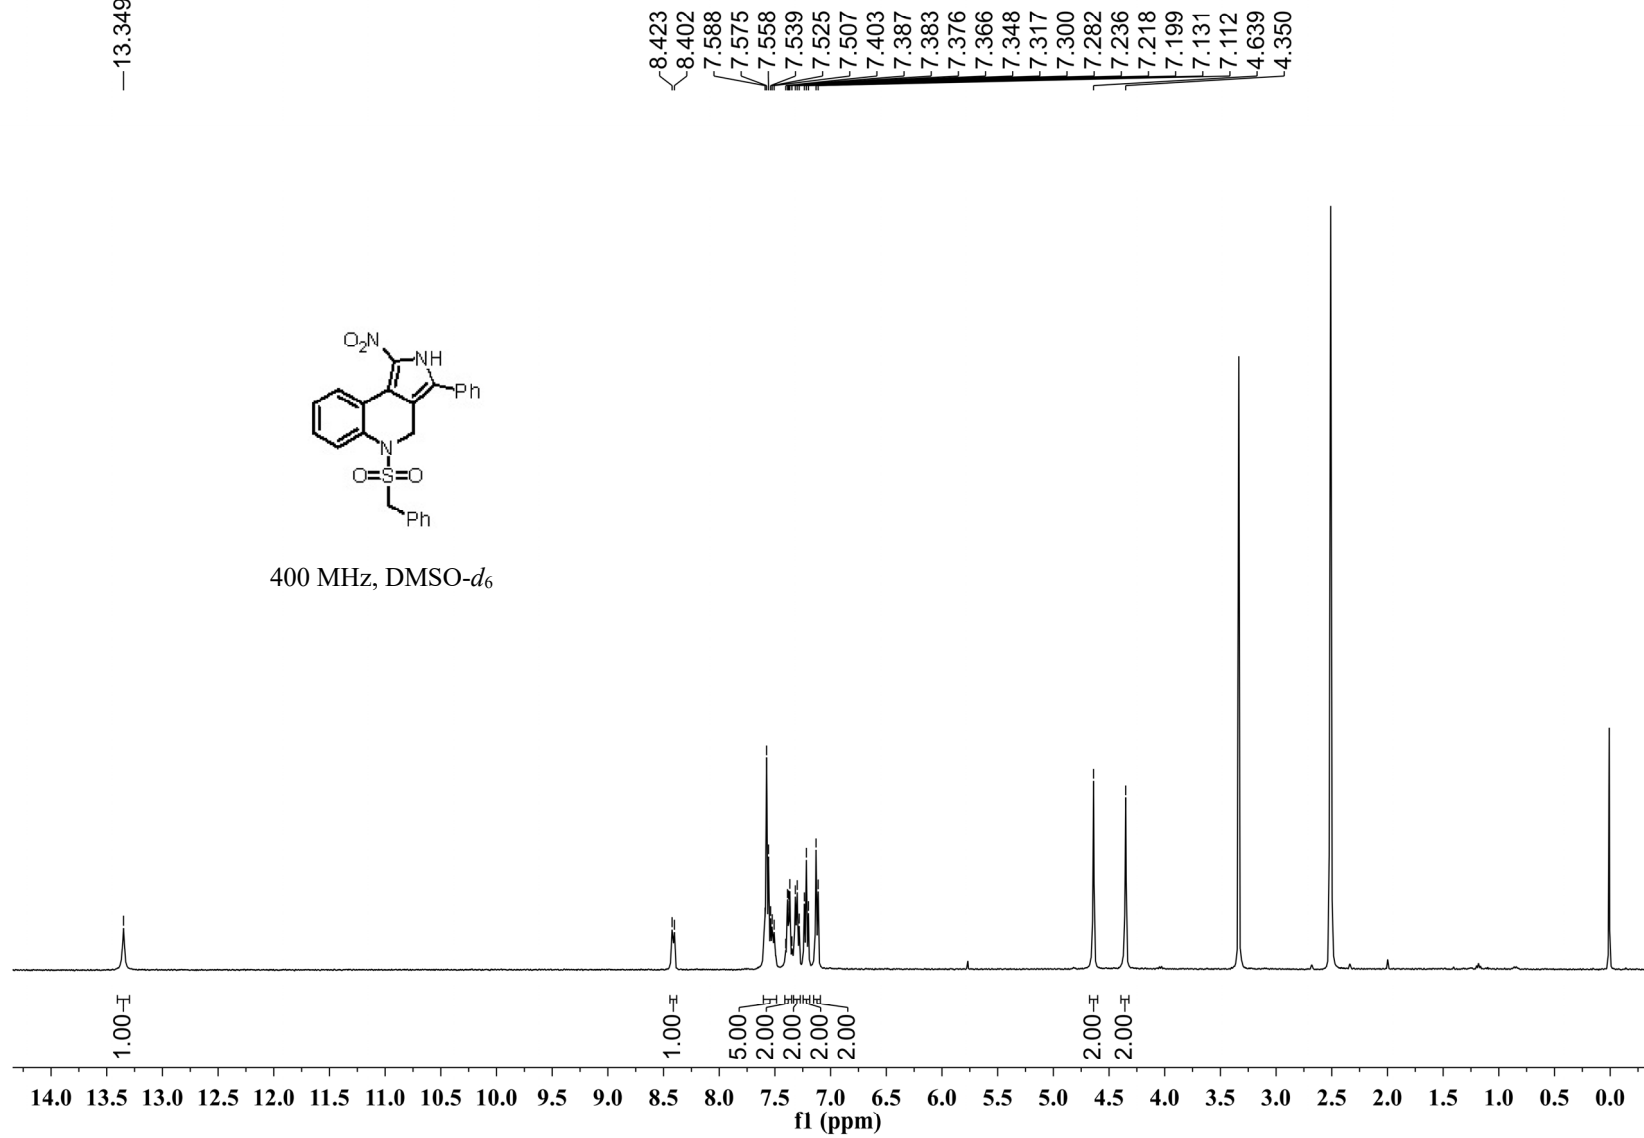

<sup>1</sup>H NMR Spectrum of Compound 3z

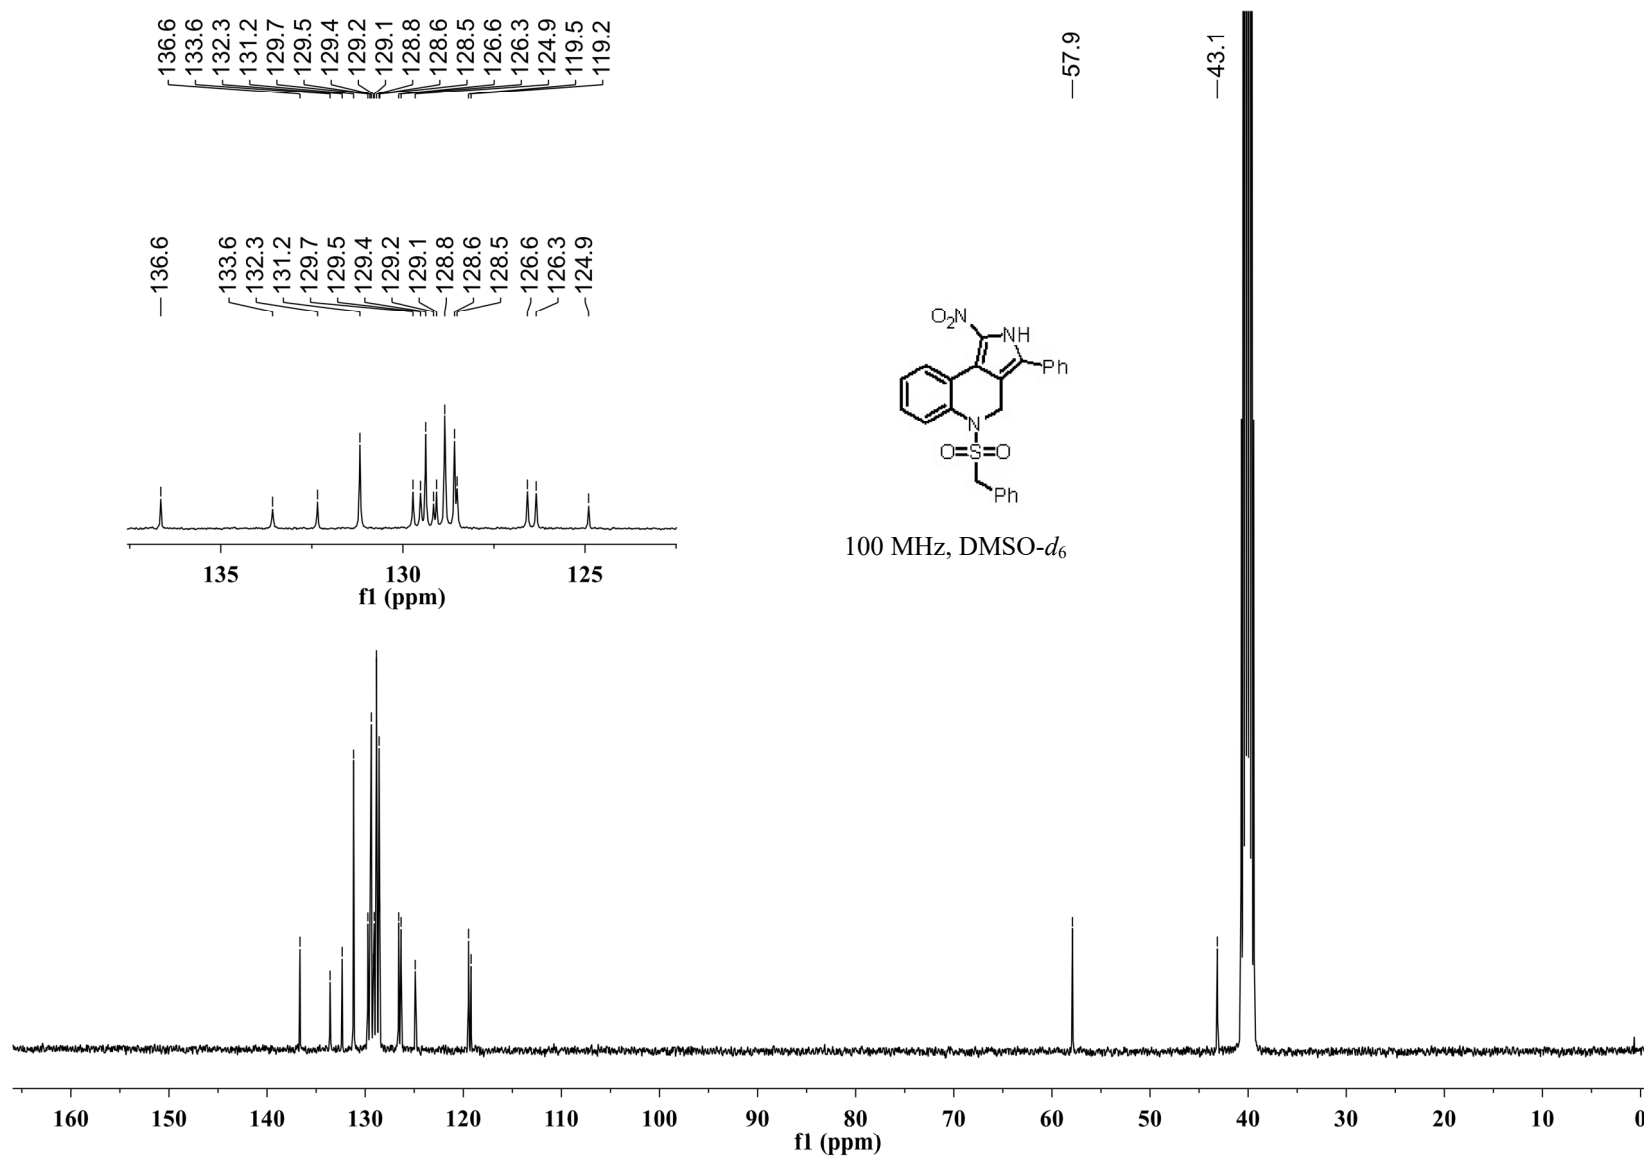

<sup>13</sup>C NMR Spectrum of Compound 3z



—13.450

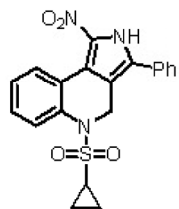

400 MHz, DMSO-*d*<sub>6</sub>

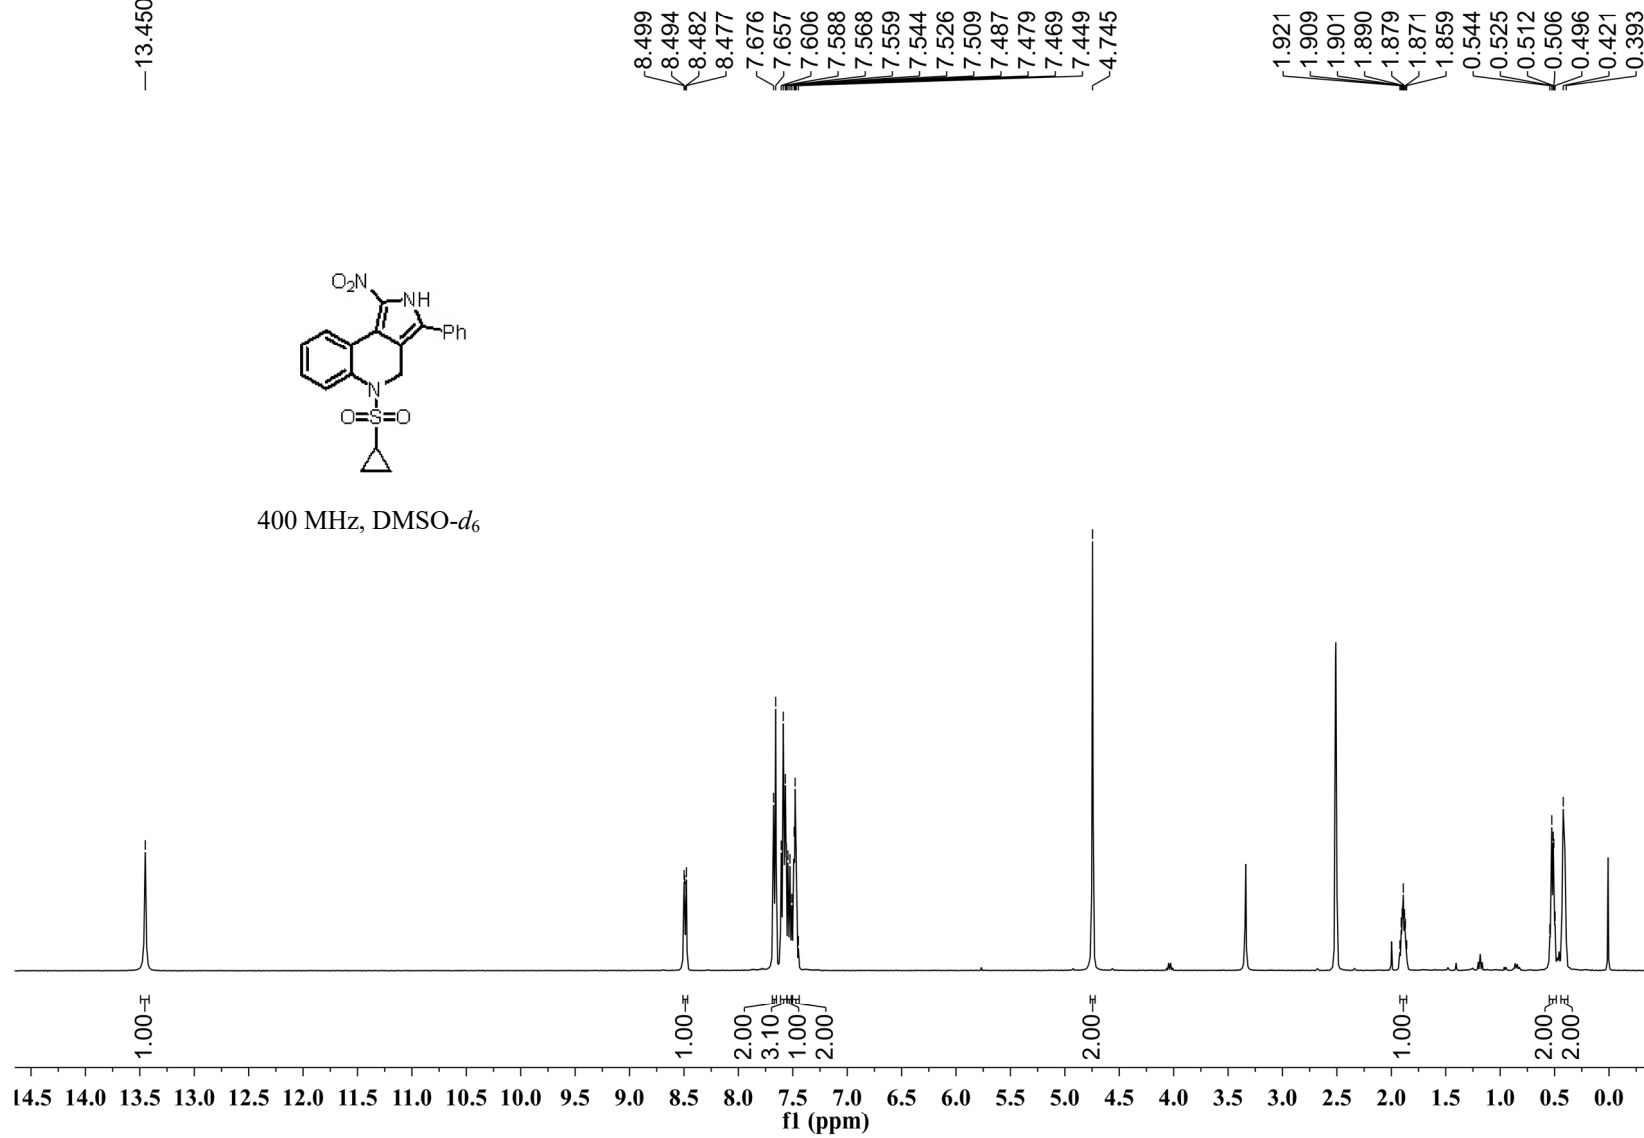

<sup>1</sup>H NMR Spectrum of Compound 3aa

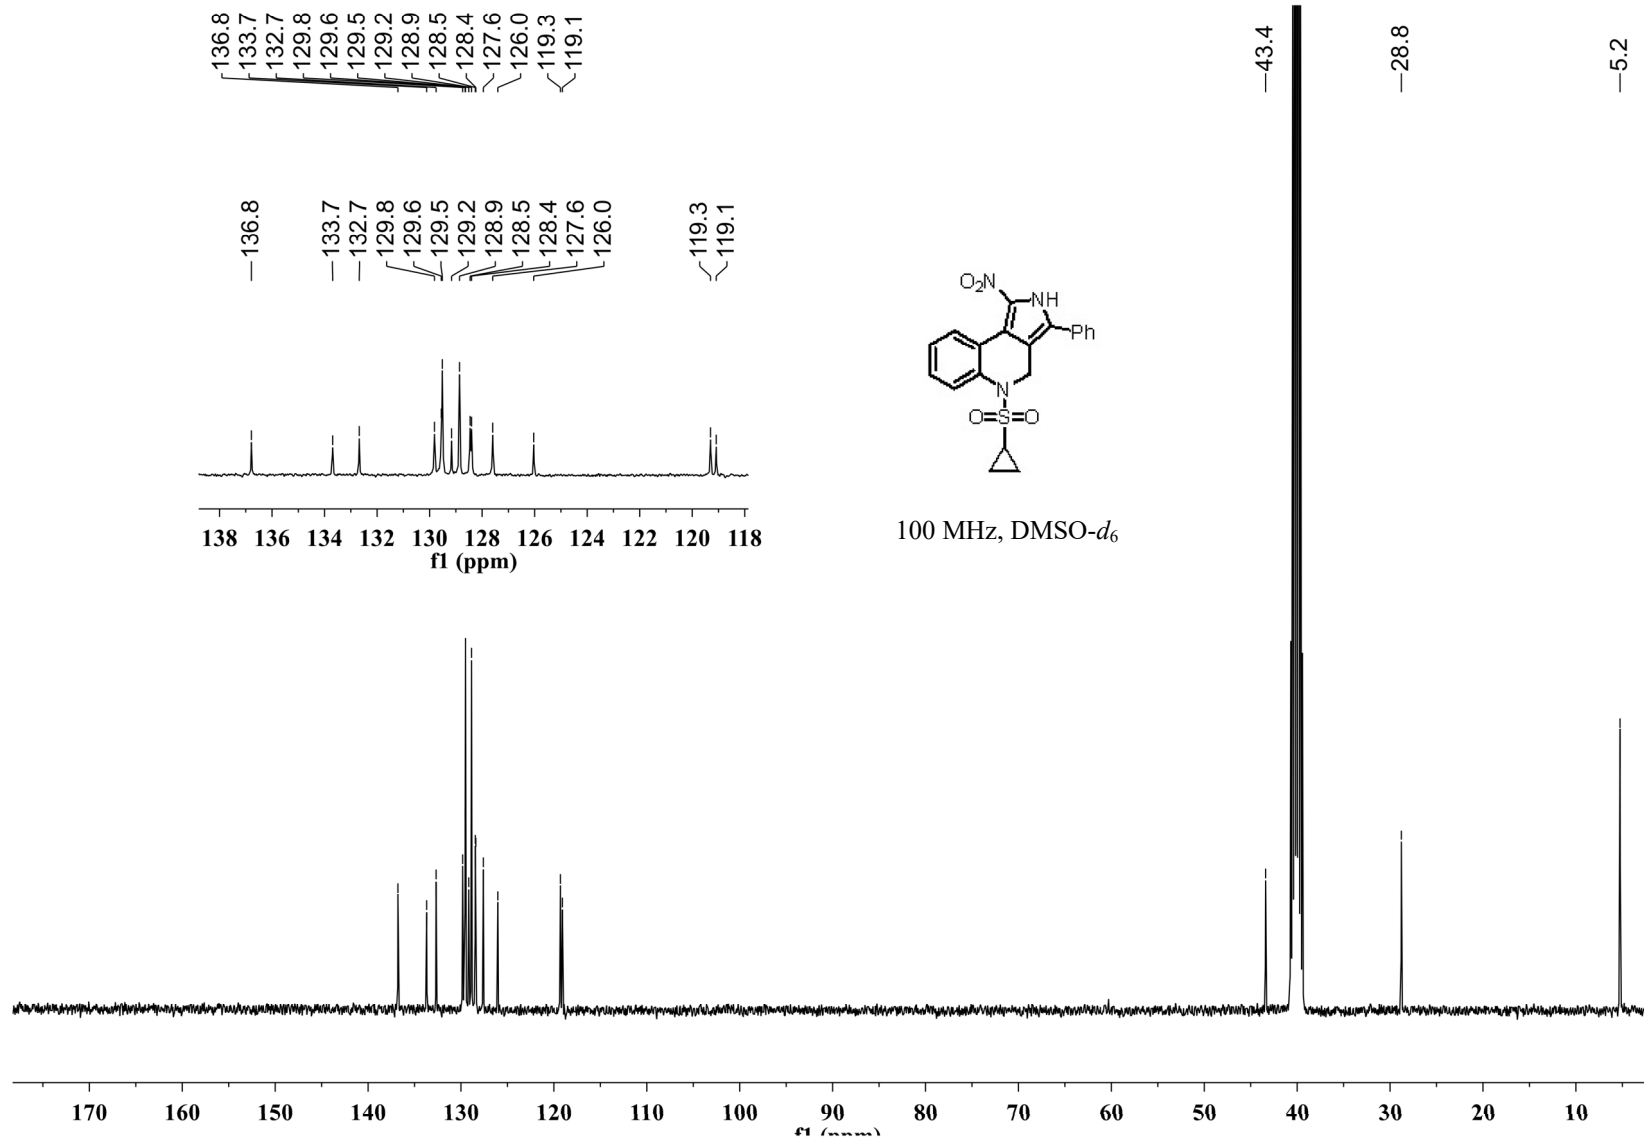

<sup>13</sup>C NMR Spectrum of Compound 3aa

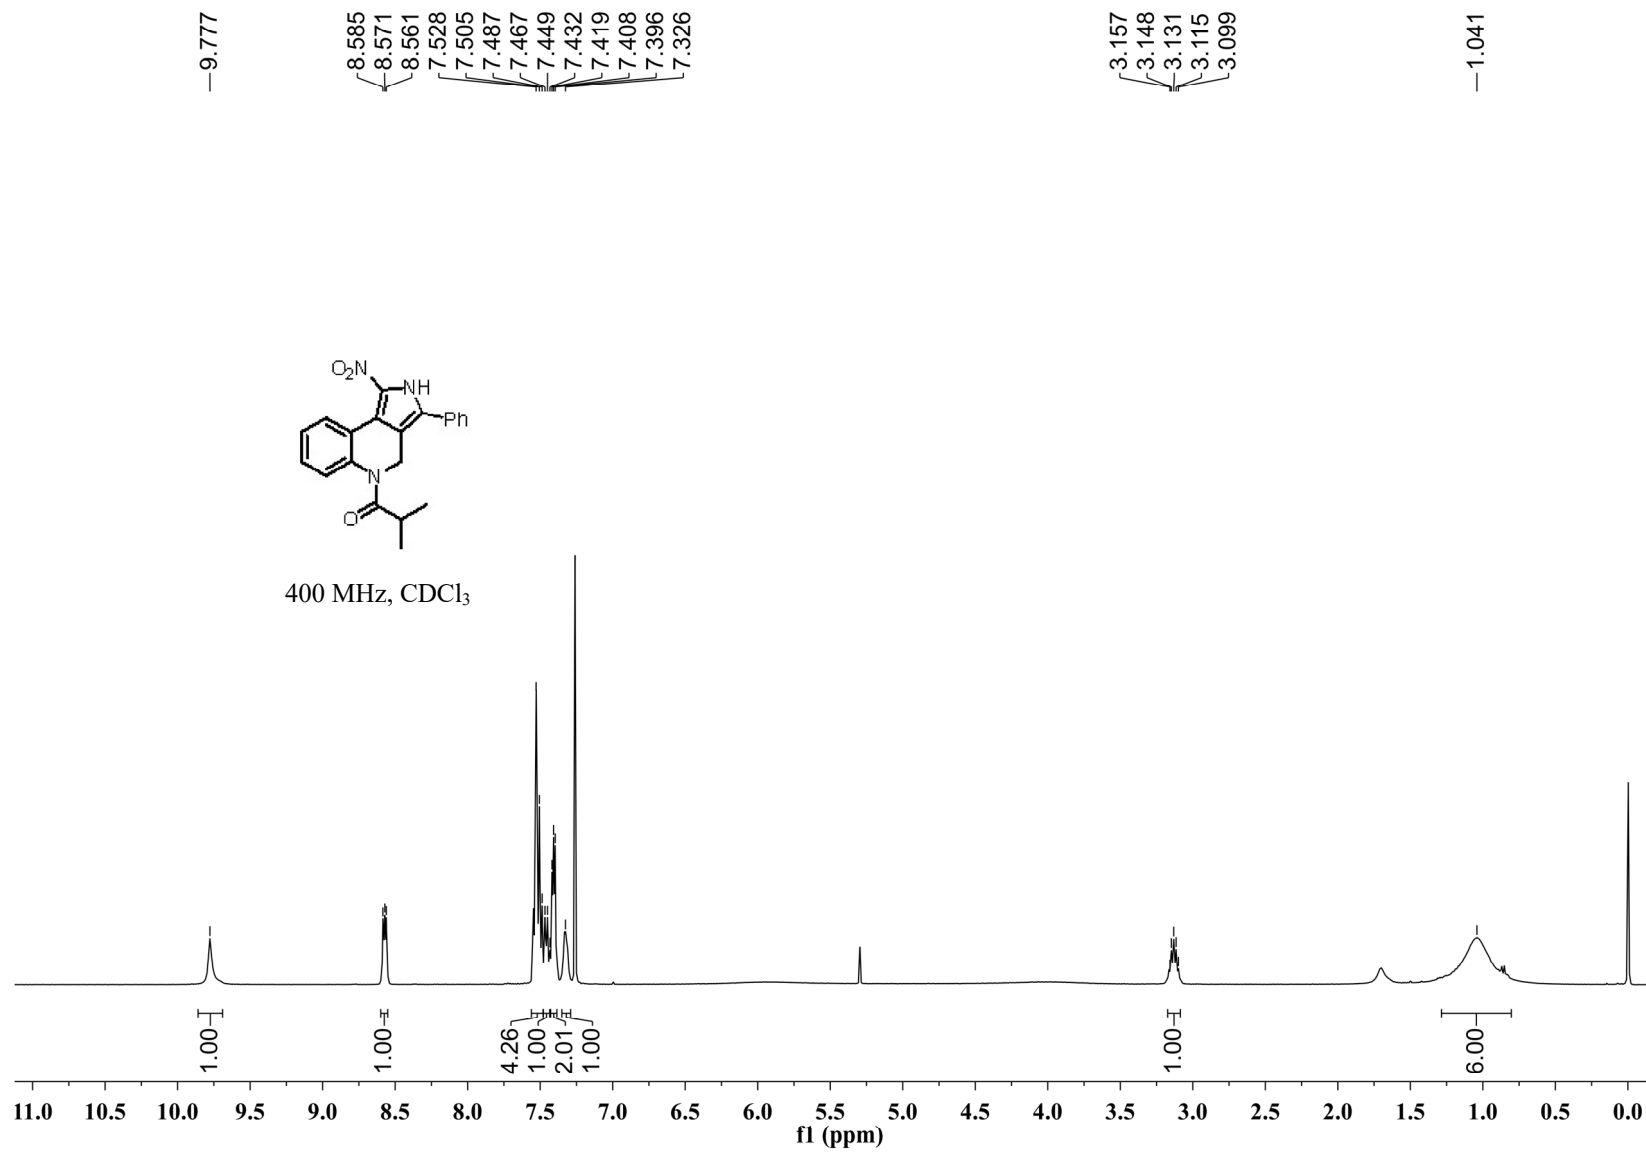

<sup>1</sup>H NMR Spectrum of Compound 3bb

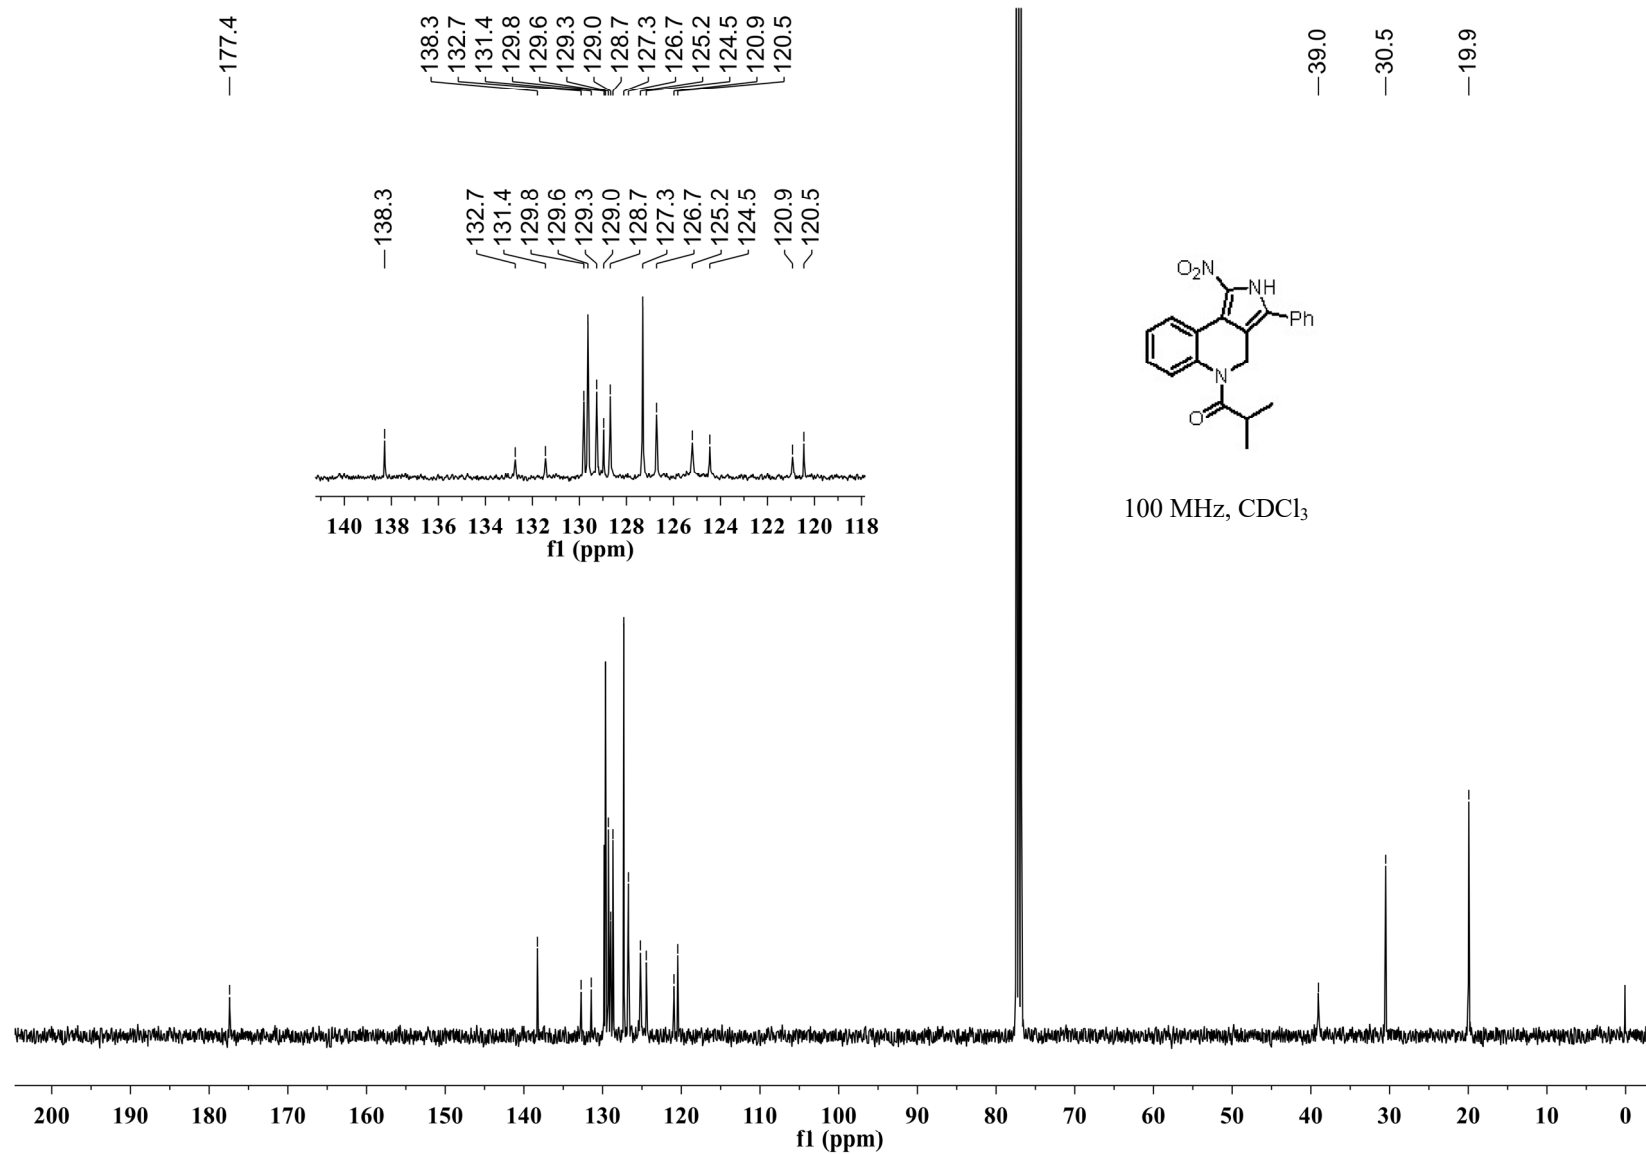

<sup>13</sup>C NMR Spectrum of Compound 3bb

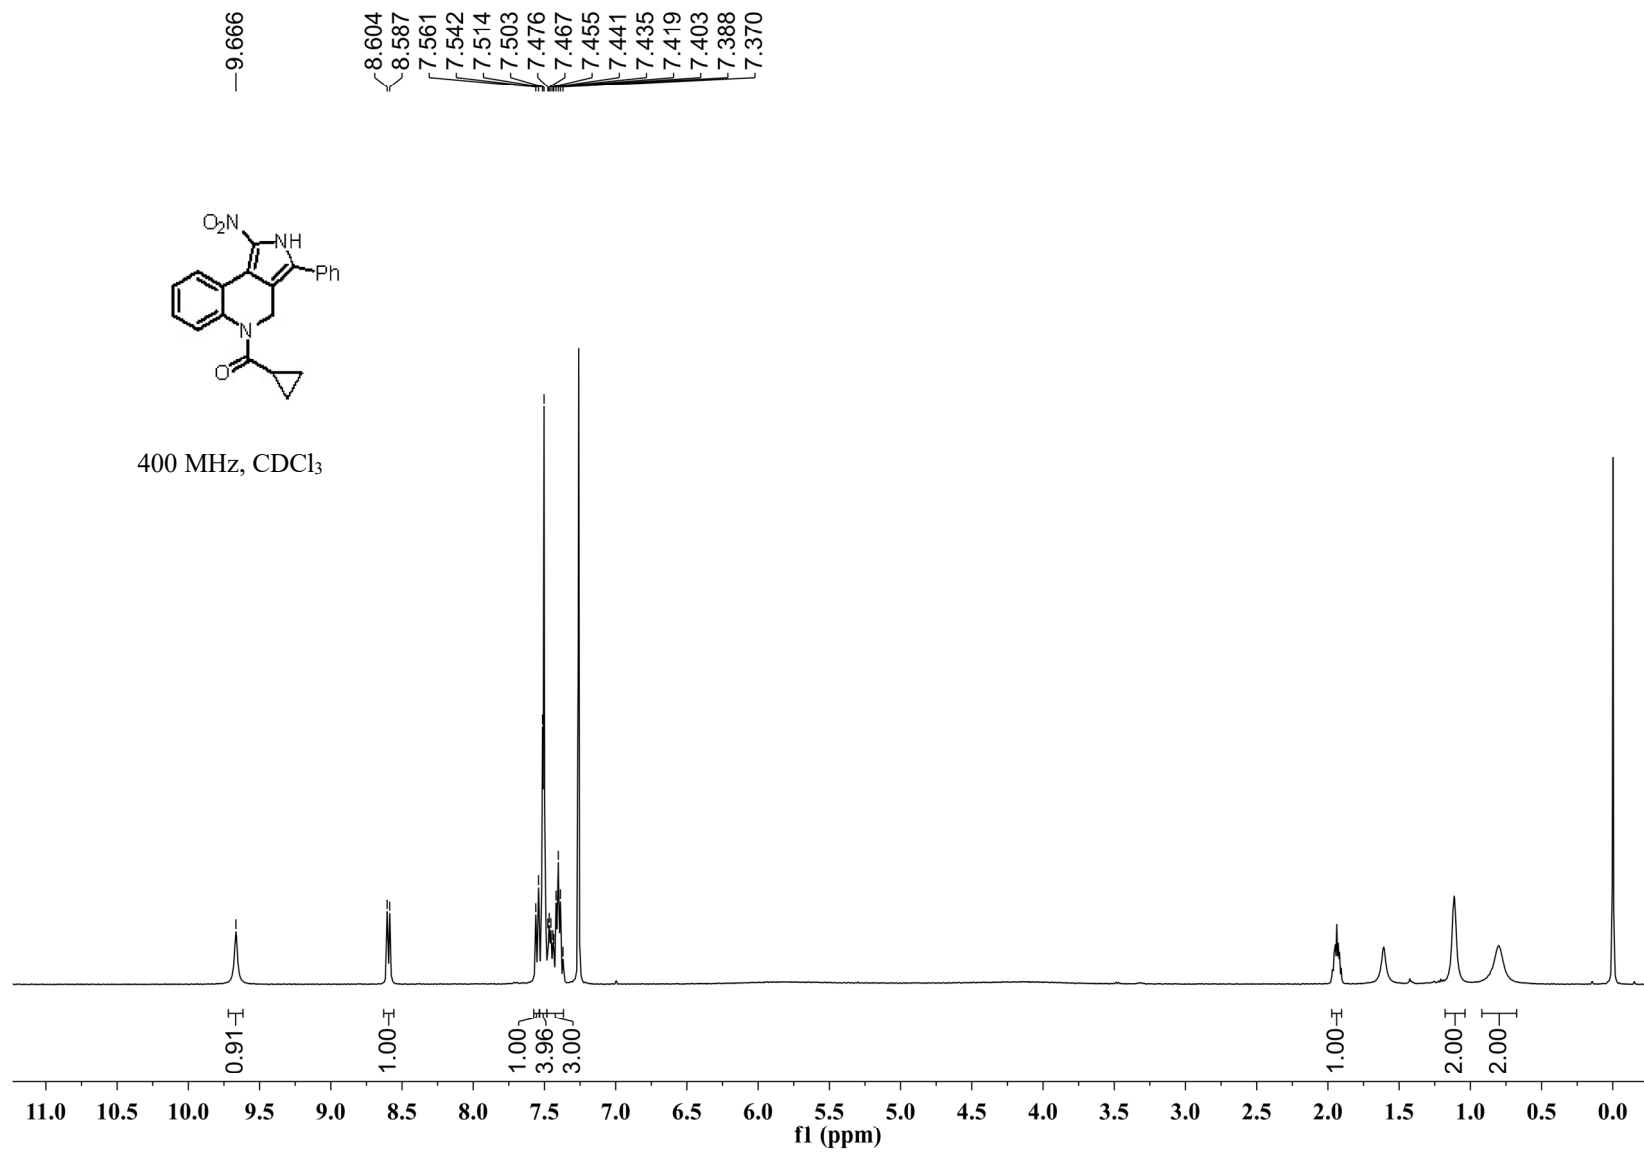

<sup>1</sup>H NMR Spectrum of Compound 3cc

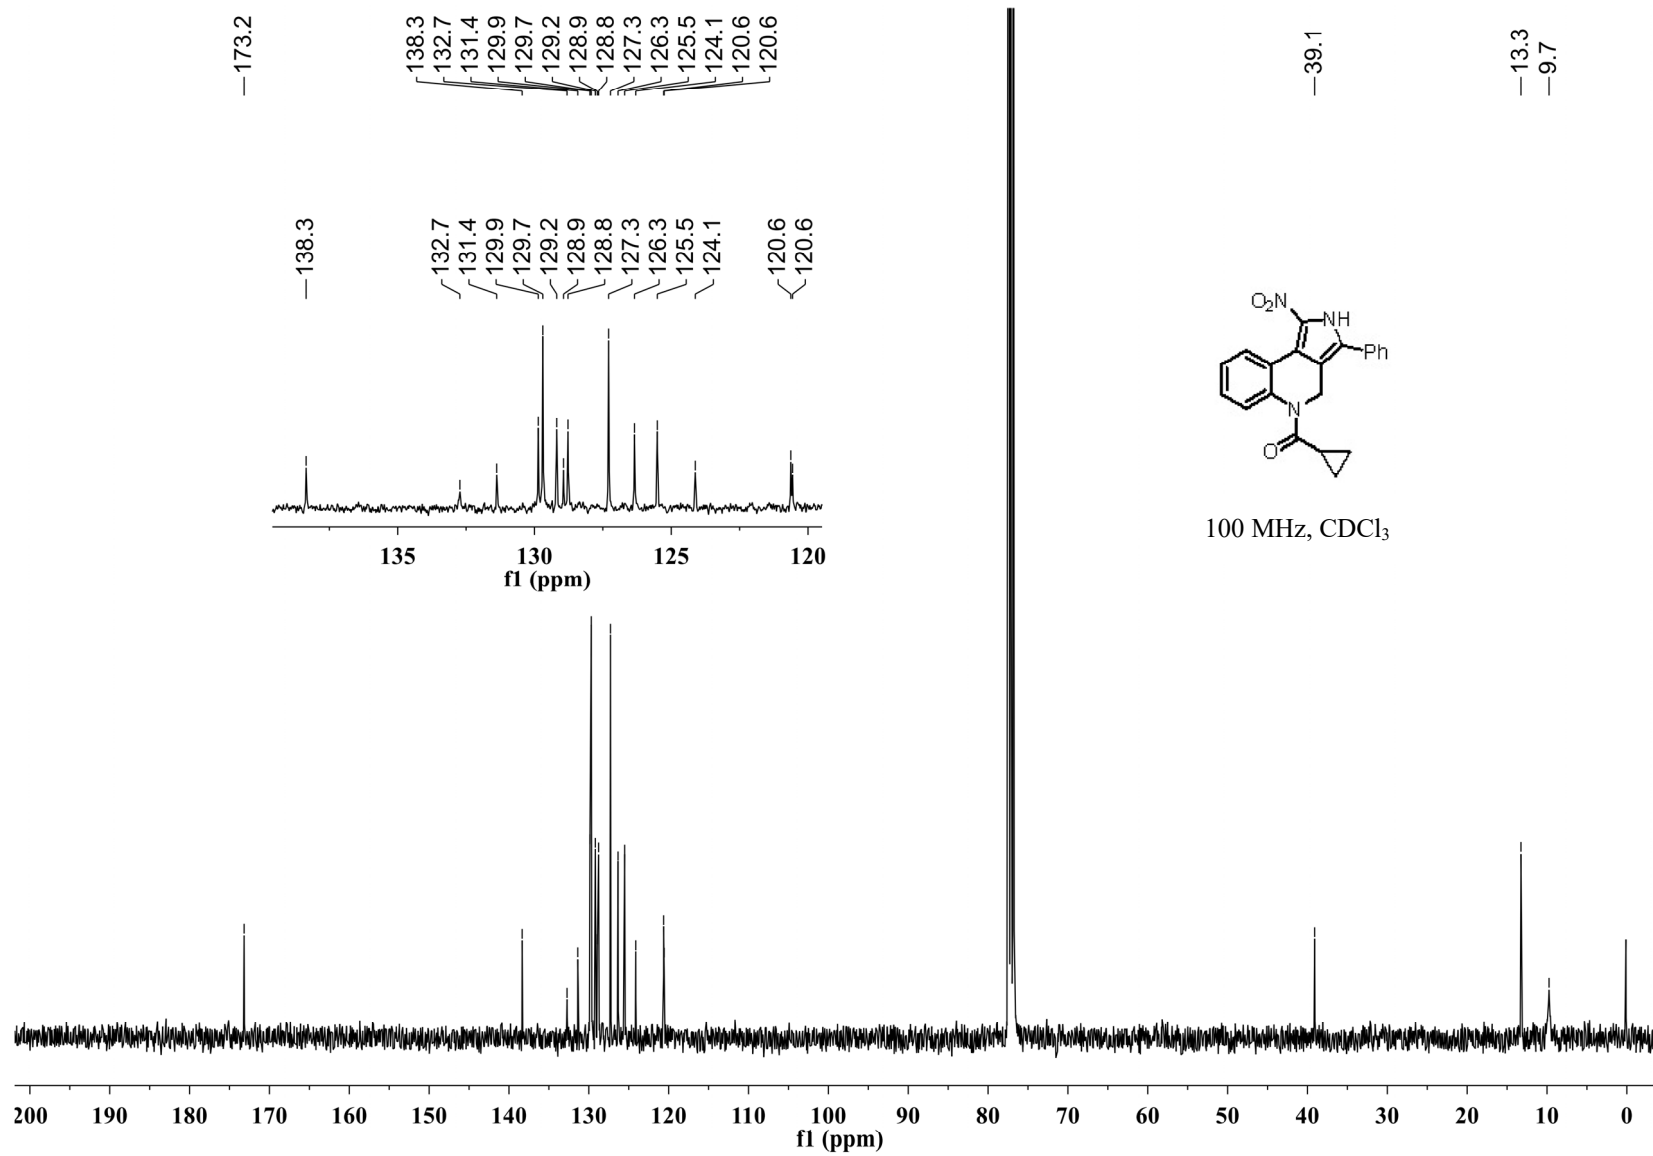

<sup>13</sup>C NMR Spectrum of Compound 3cc

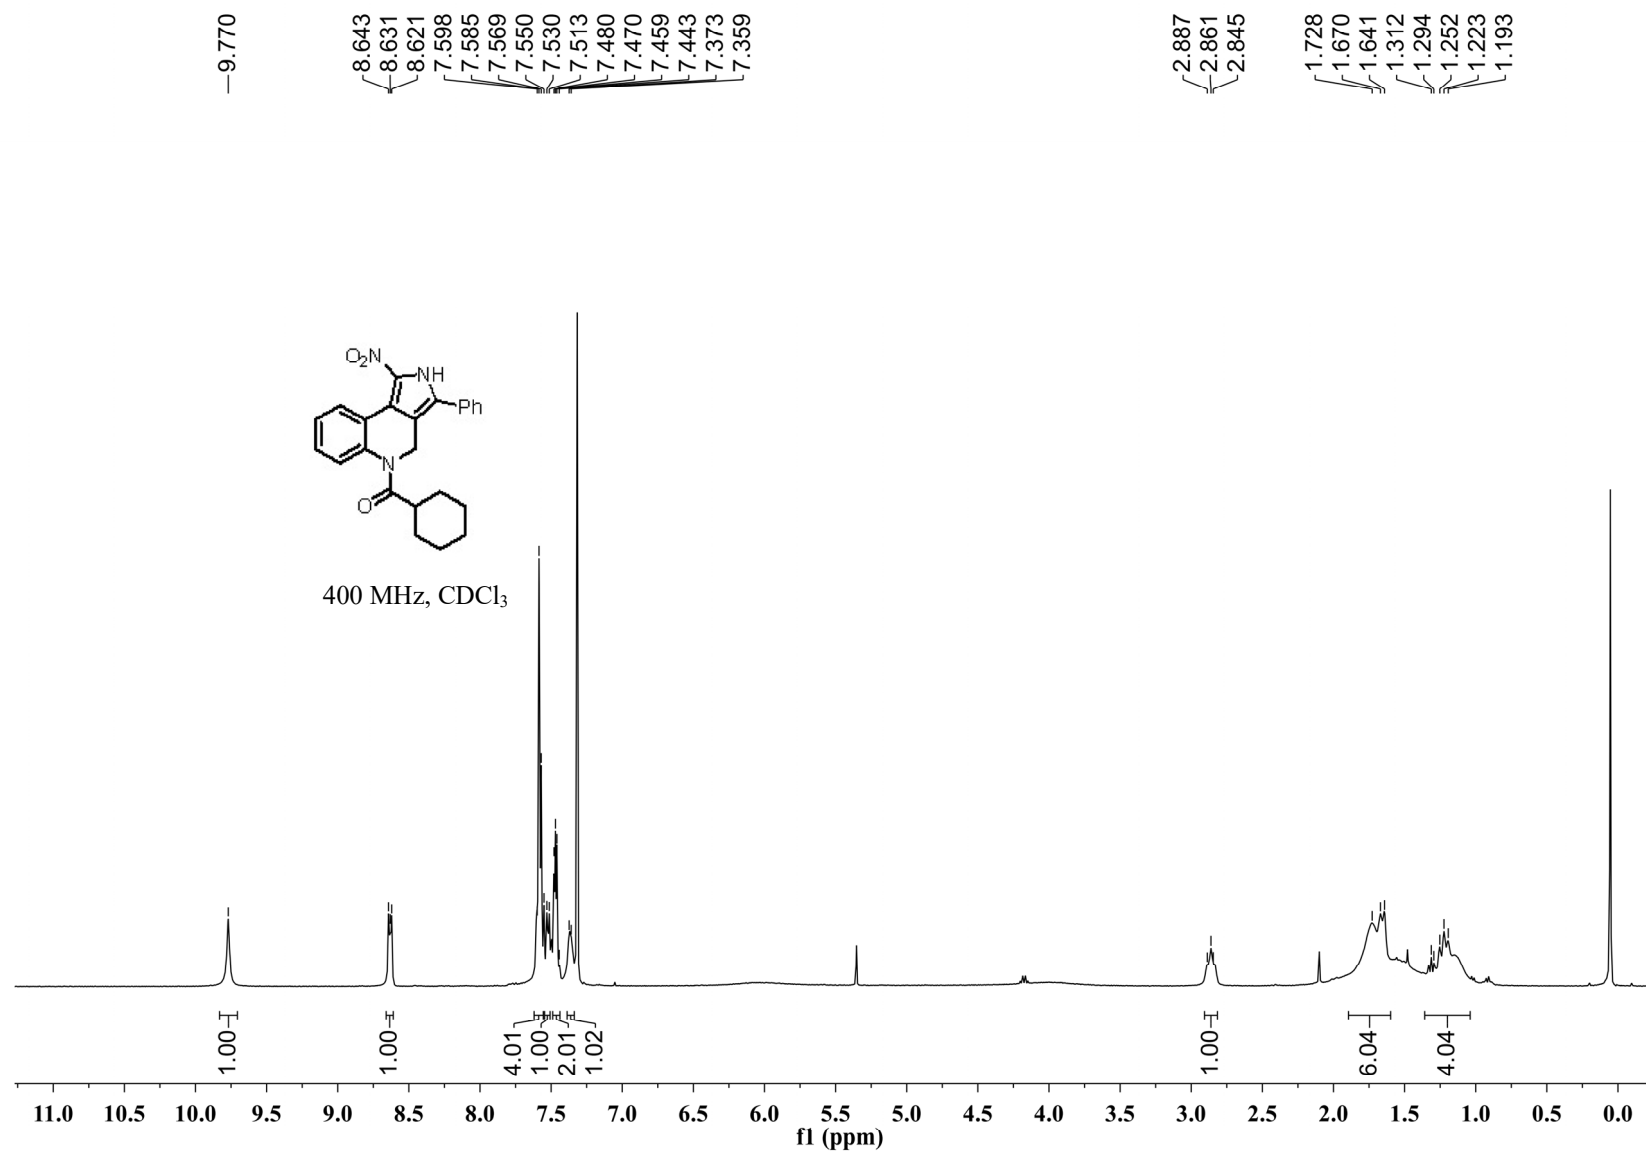

<sup>1</sup>H NMR Spectrum of Compound 3dd

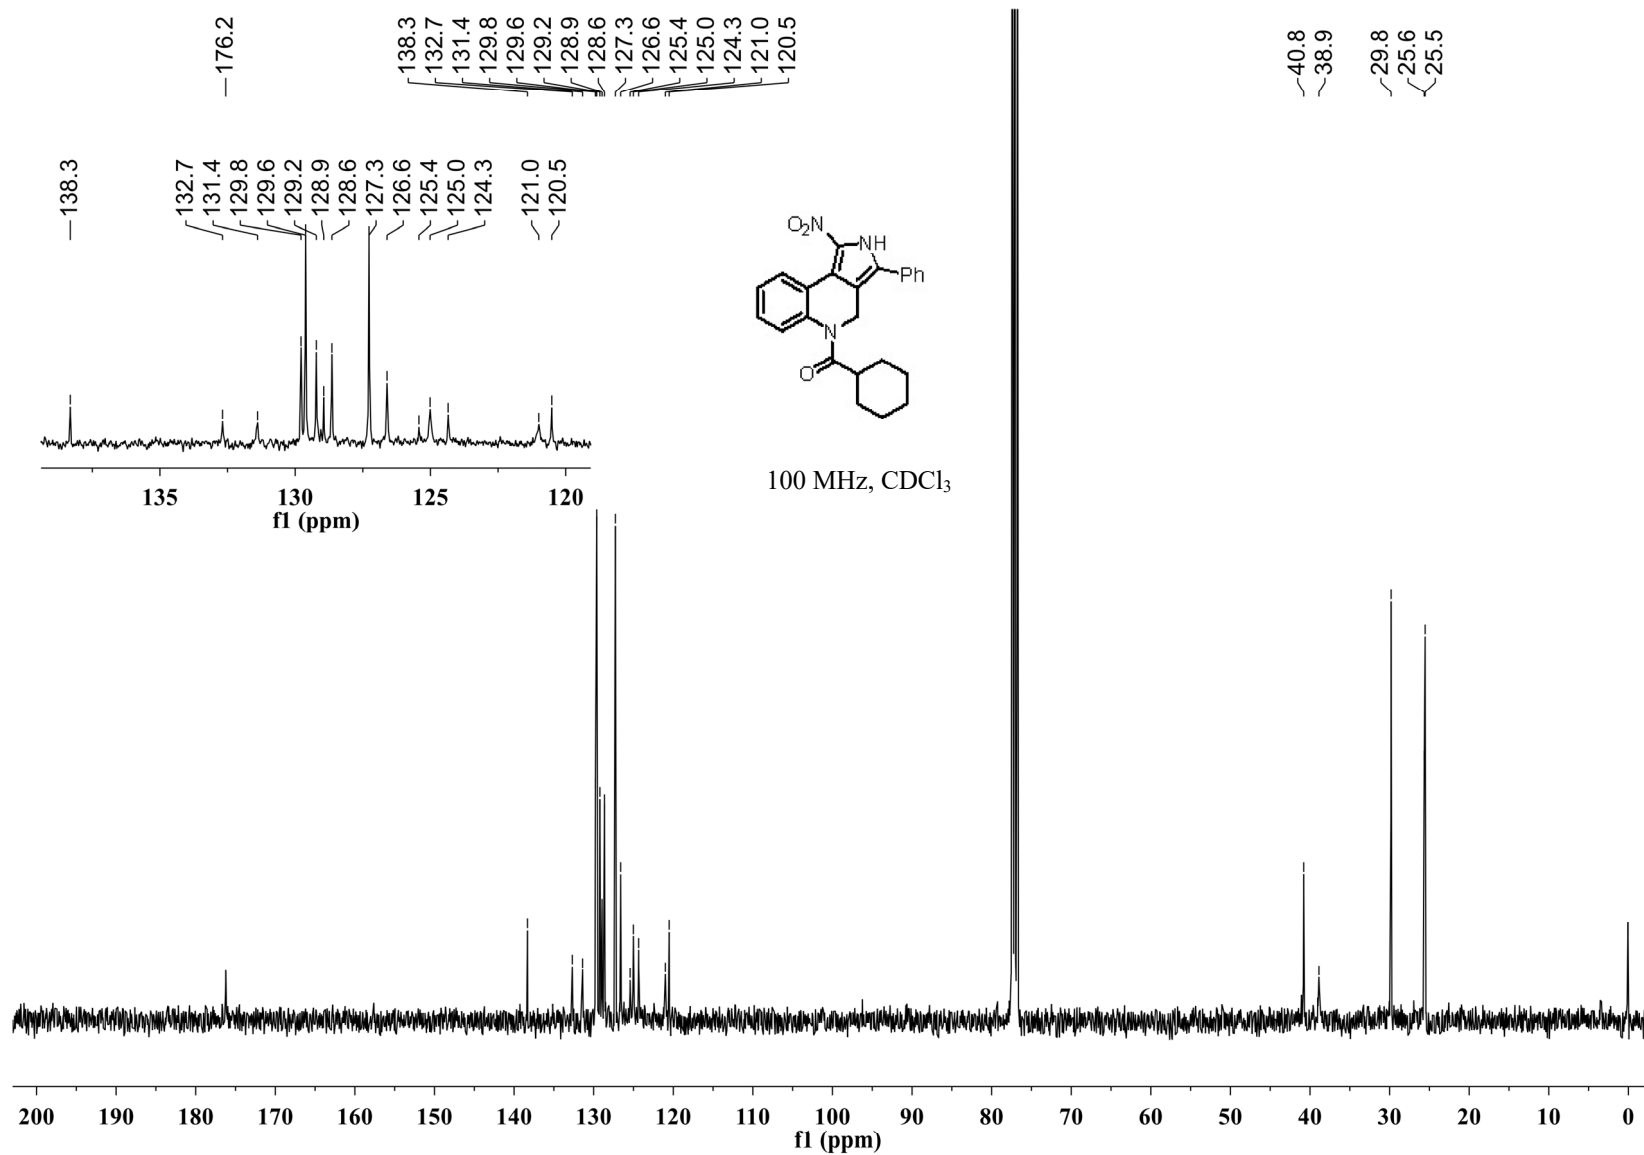

<sup>13</sup>C NMR Spectrum of Compound 3dd



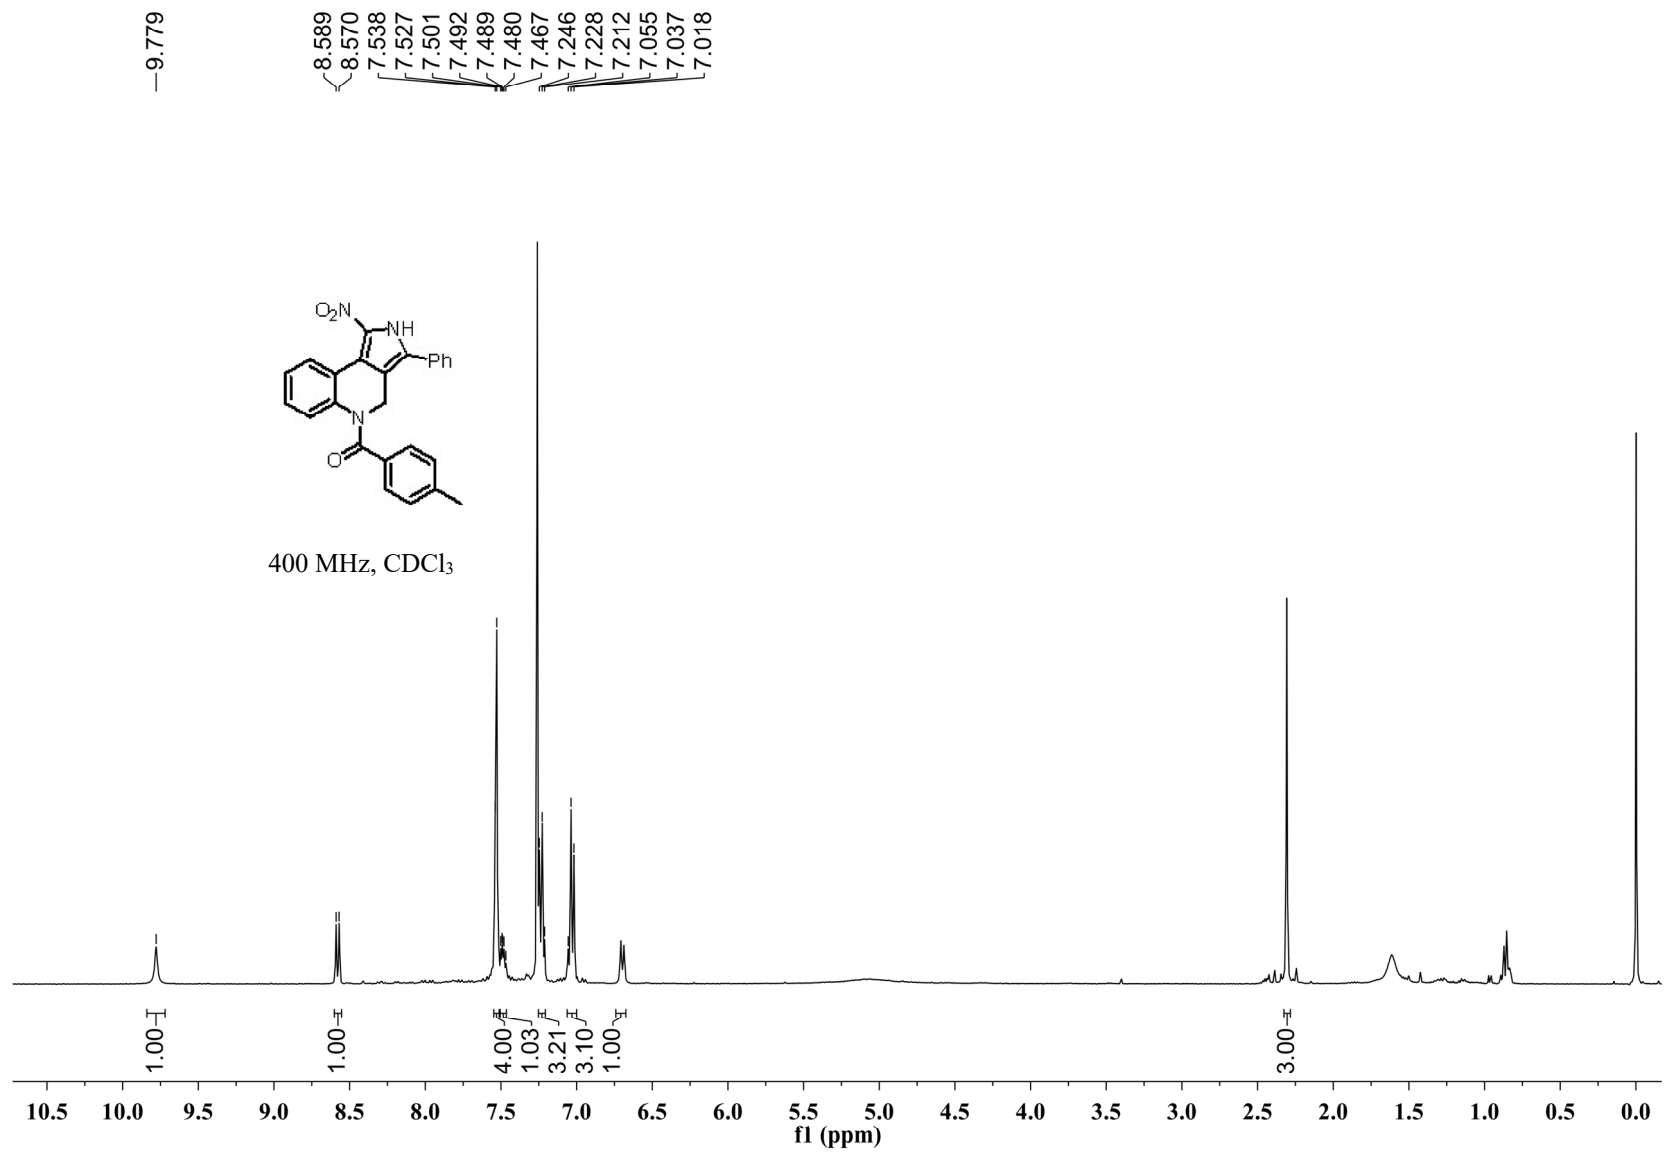

<sup>1</sup>H NMR Spectrum of Compound 3ee

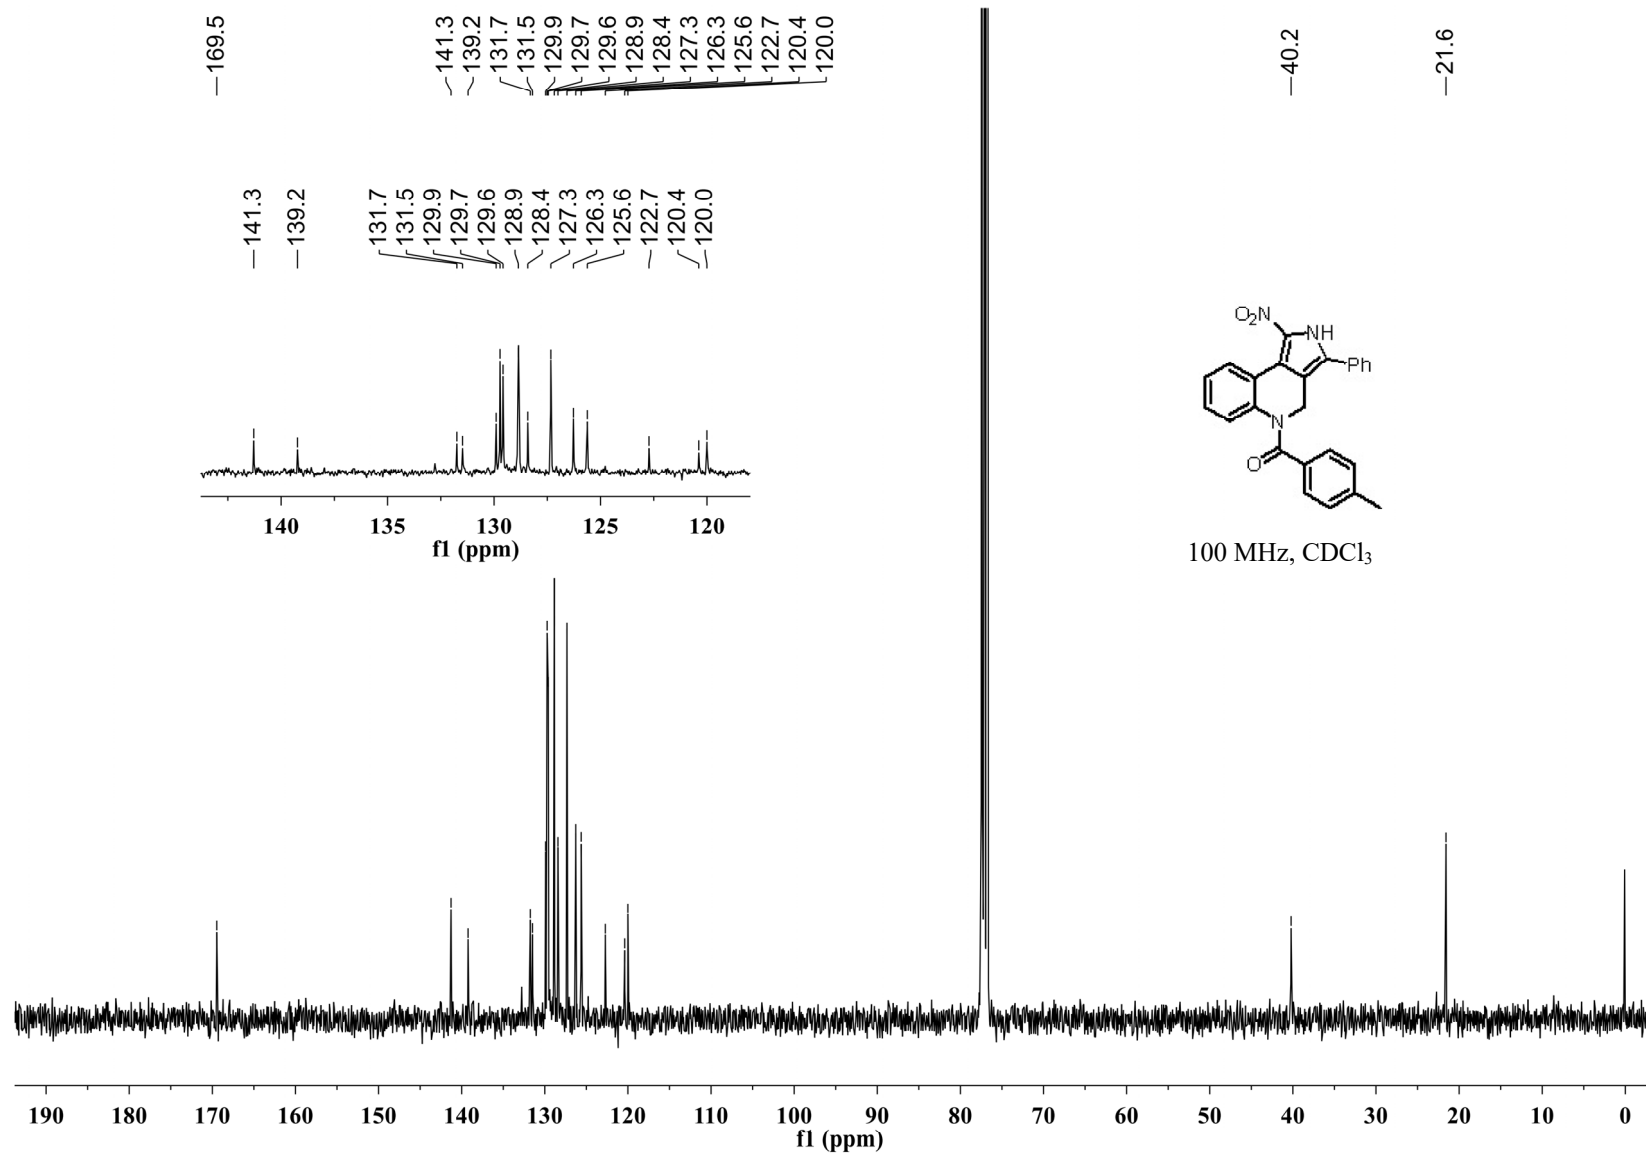

<sup>13</sup>C NMR Spectrum of Compound 3ee

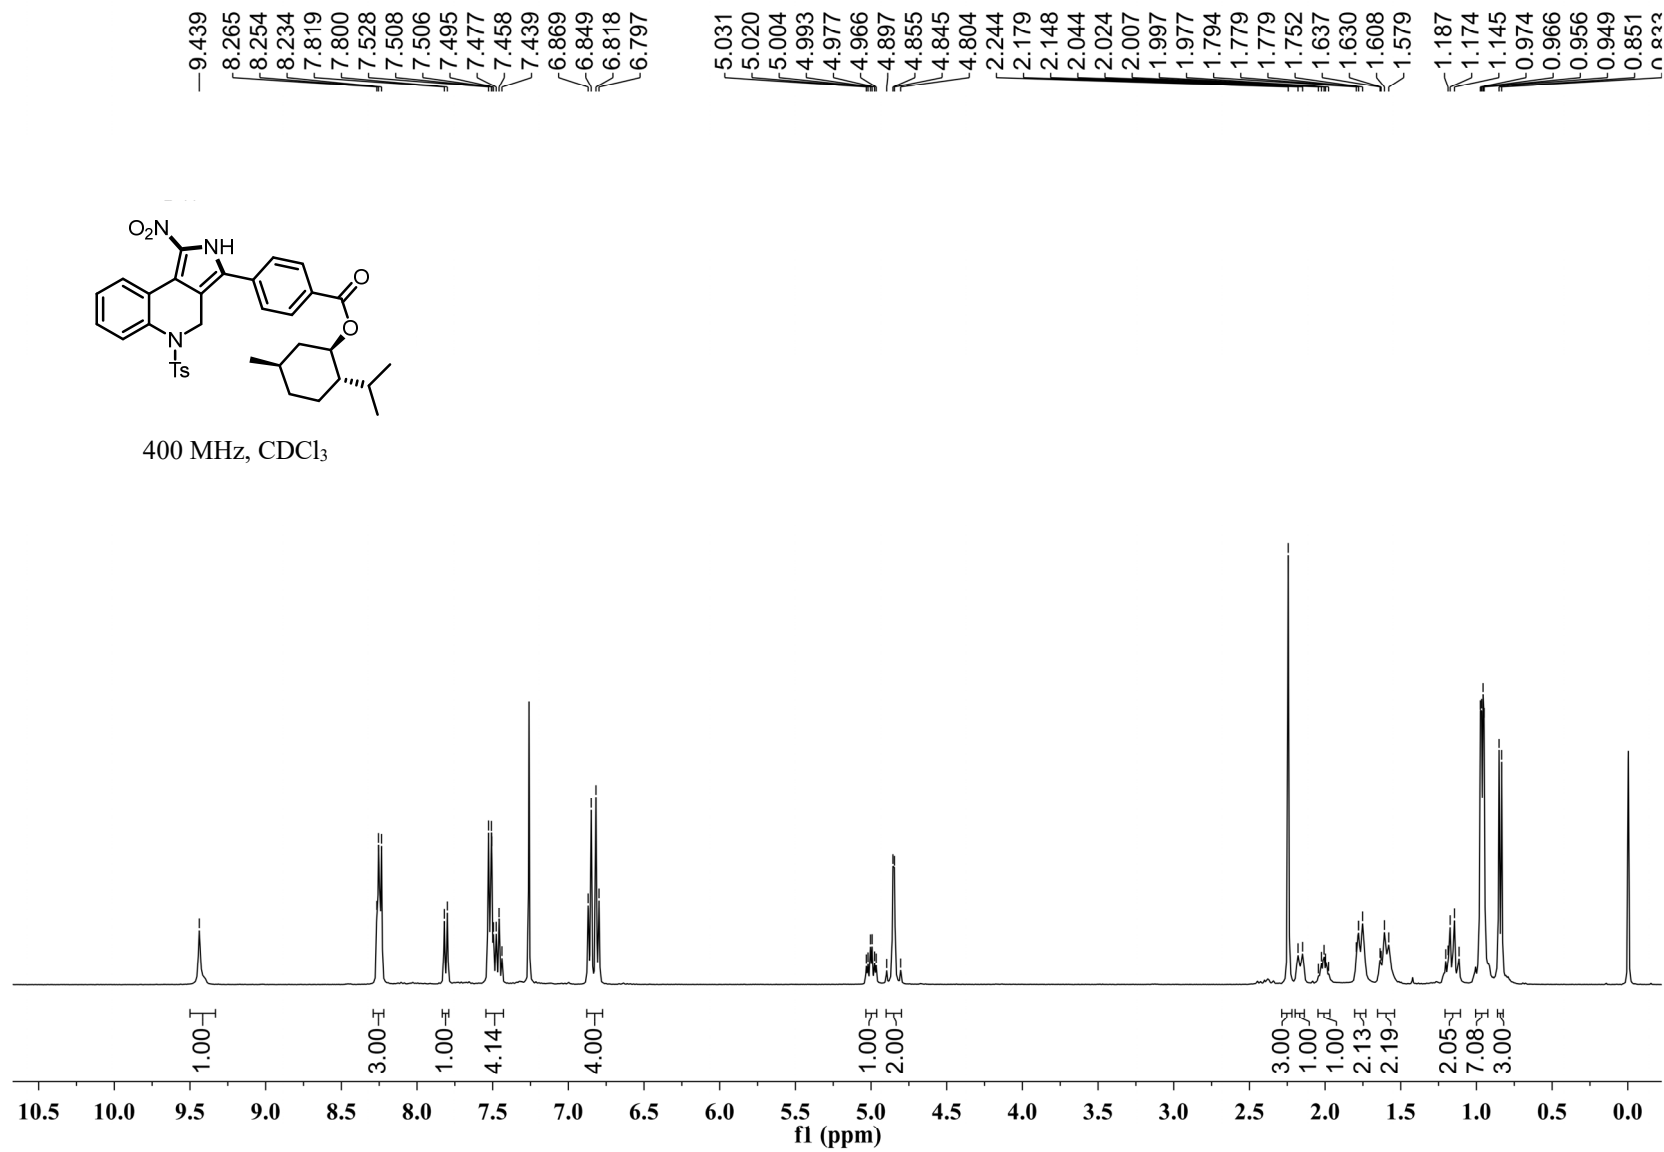

<sup>1</sup>H NMR Spectrum of Compound 3ff

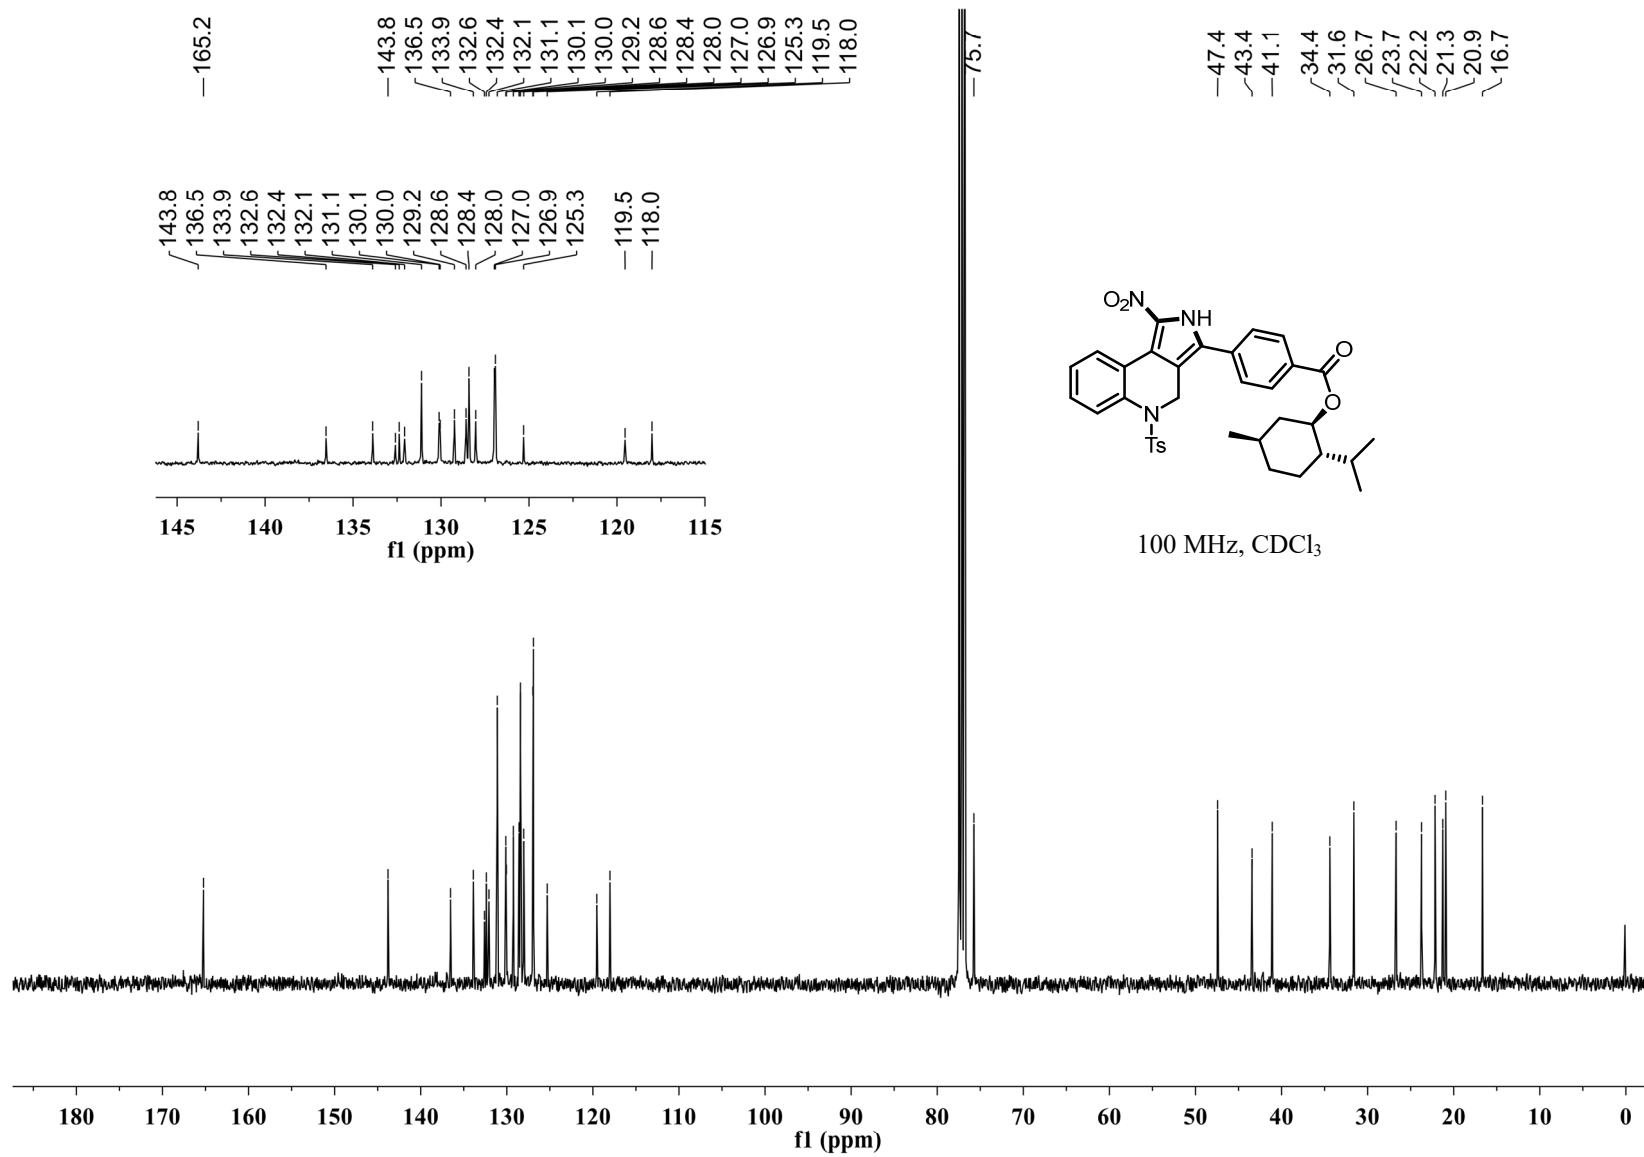

<sup>13</sup>C NMR Spectrum of Compound 3ff

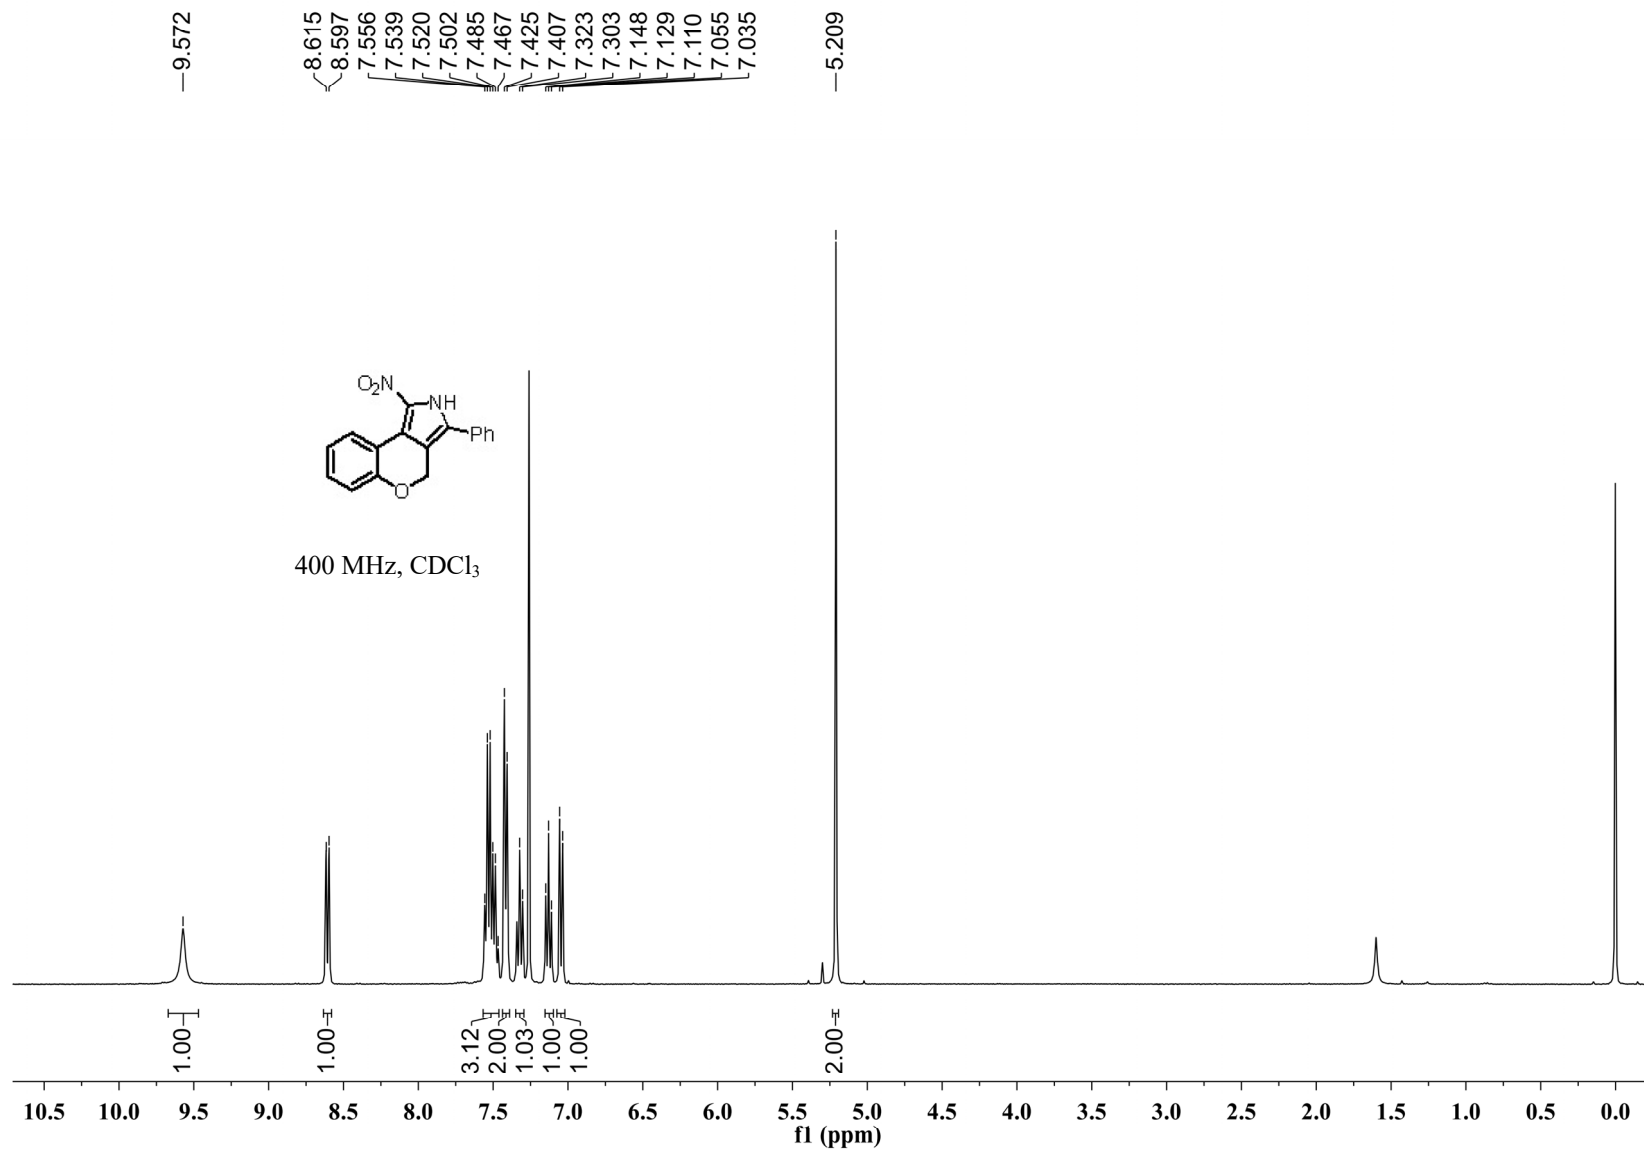

<sup>1</sup>H NMR Spectrum of Compound 5a

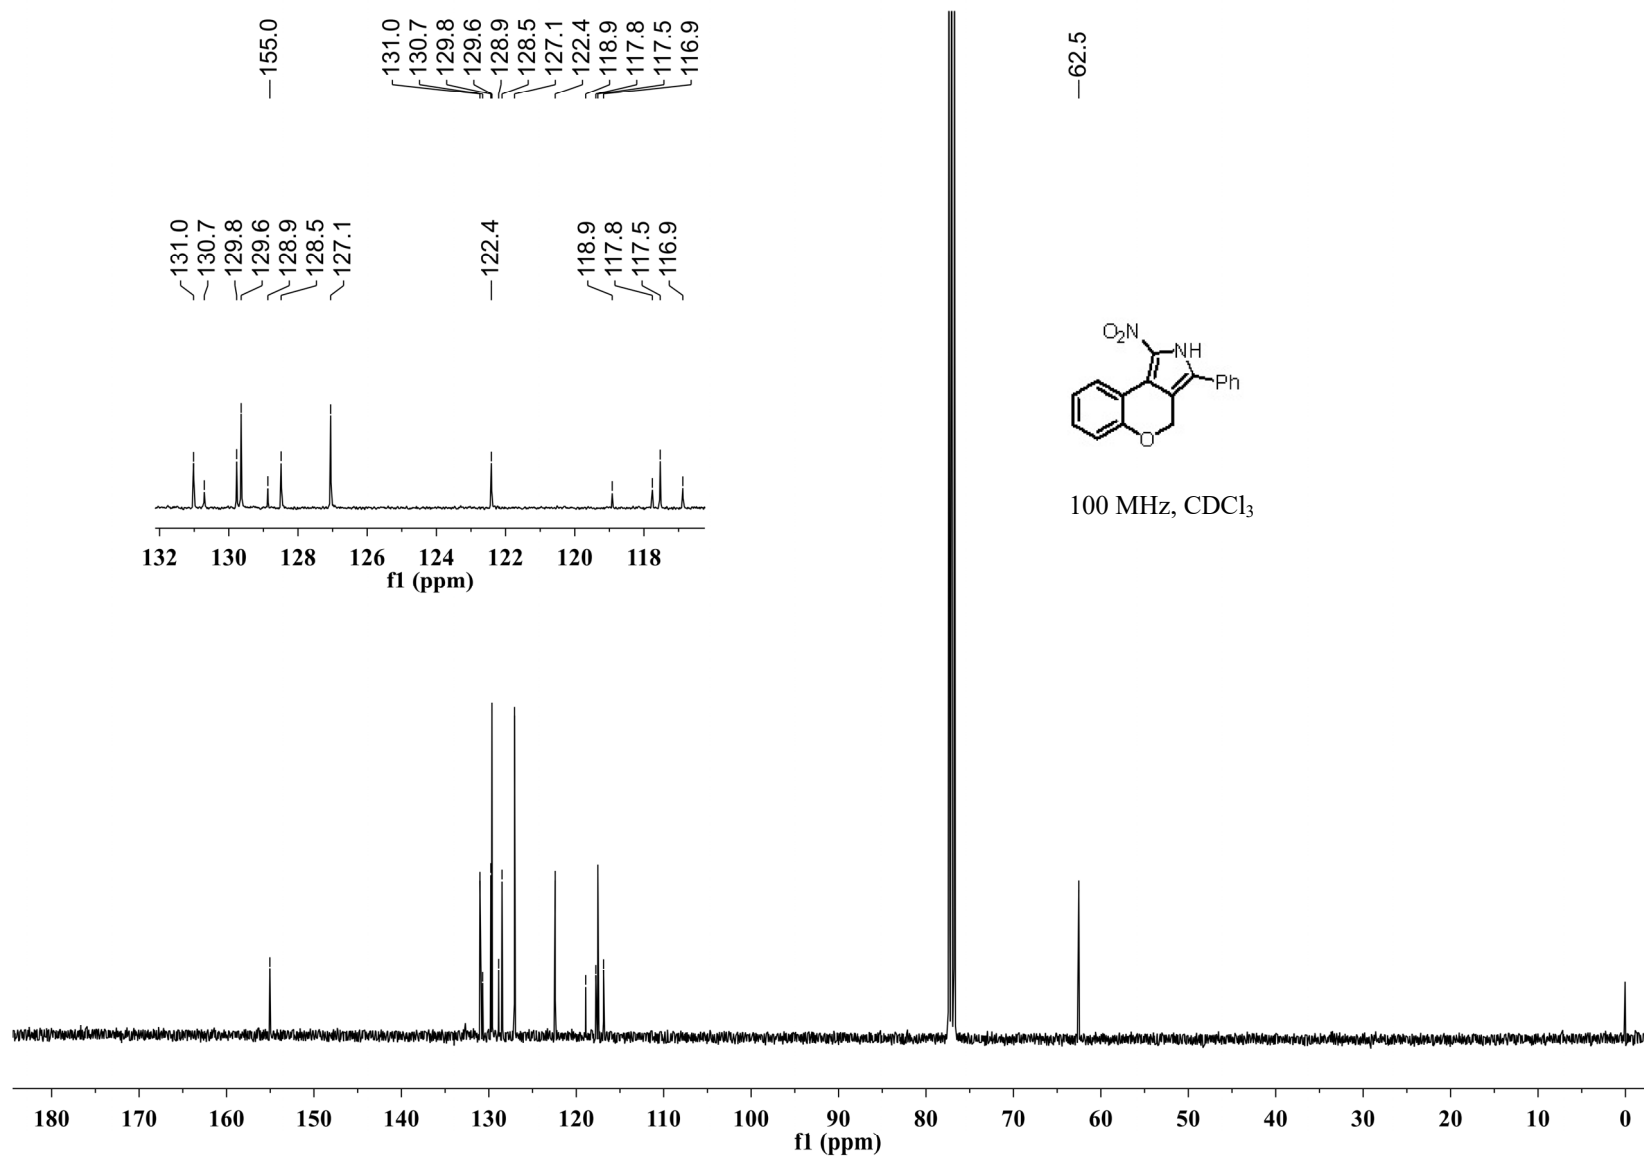

<sup>13</sup>C NMR Spectrum of Compound 5a

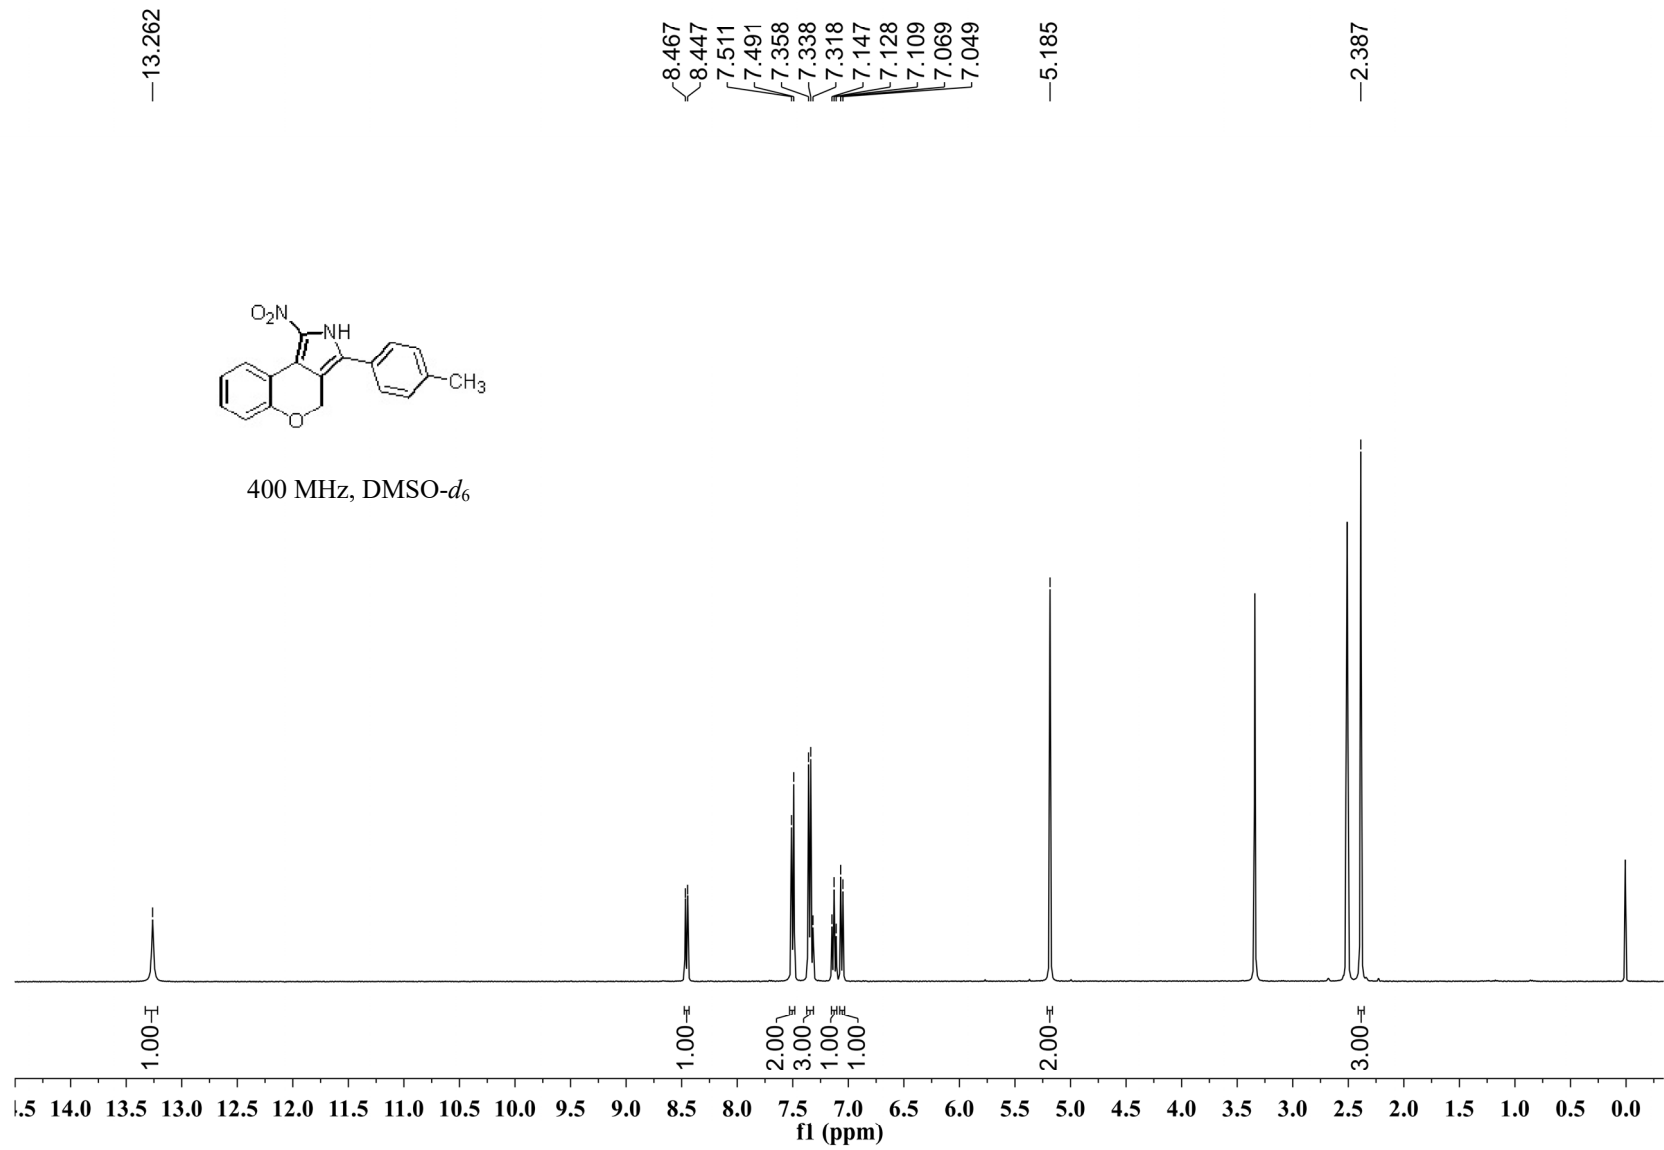

<sup>1</sup>H NMR Spectrum of Compound 5b

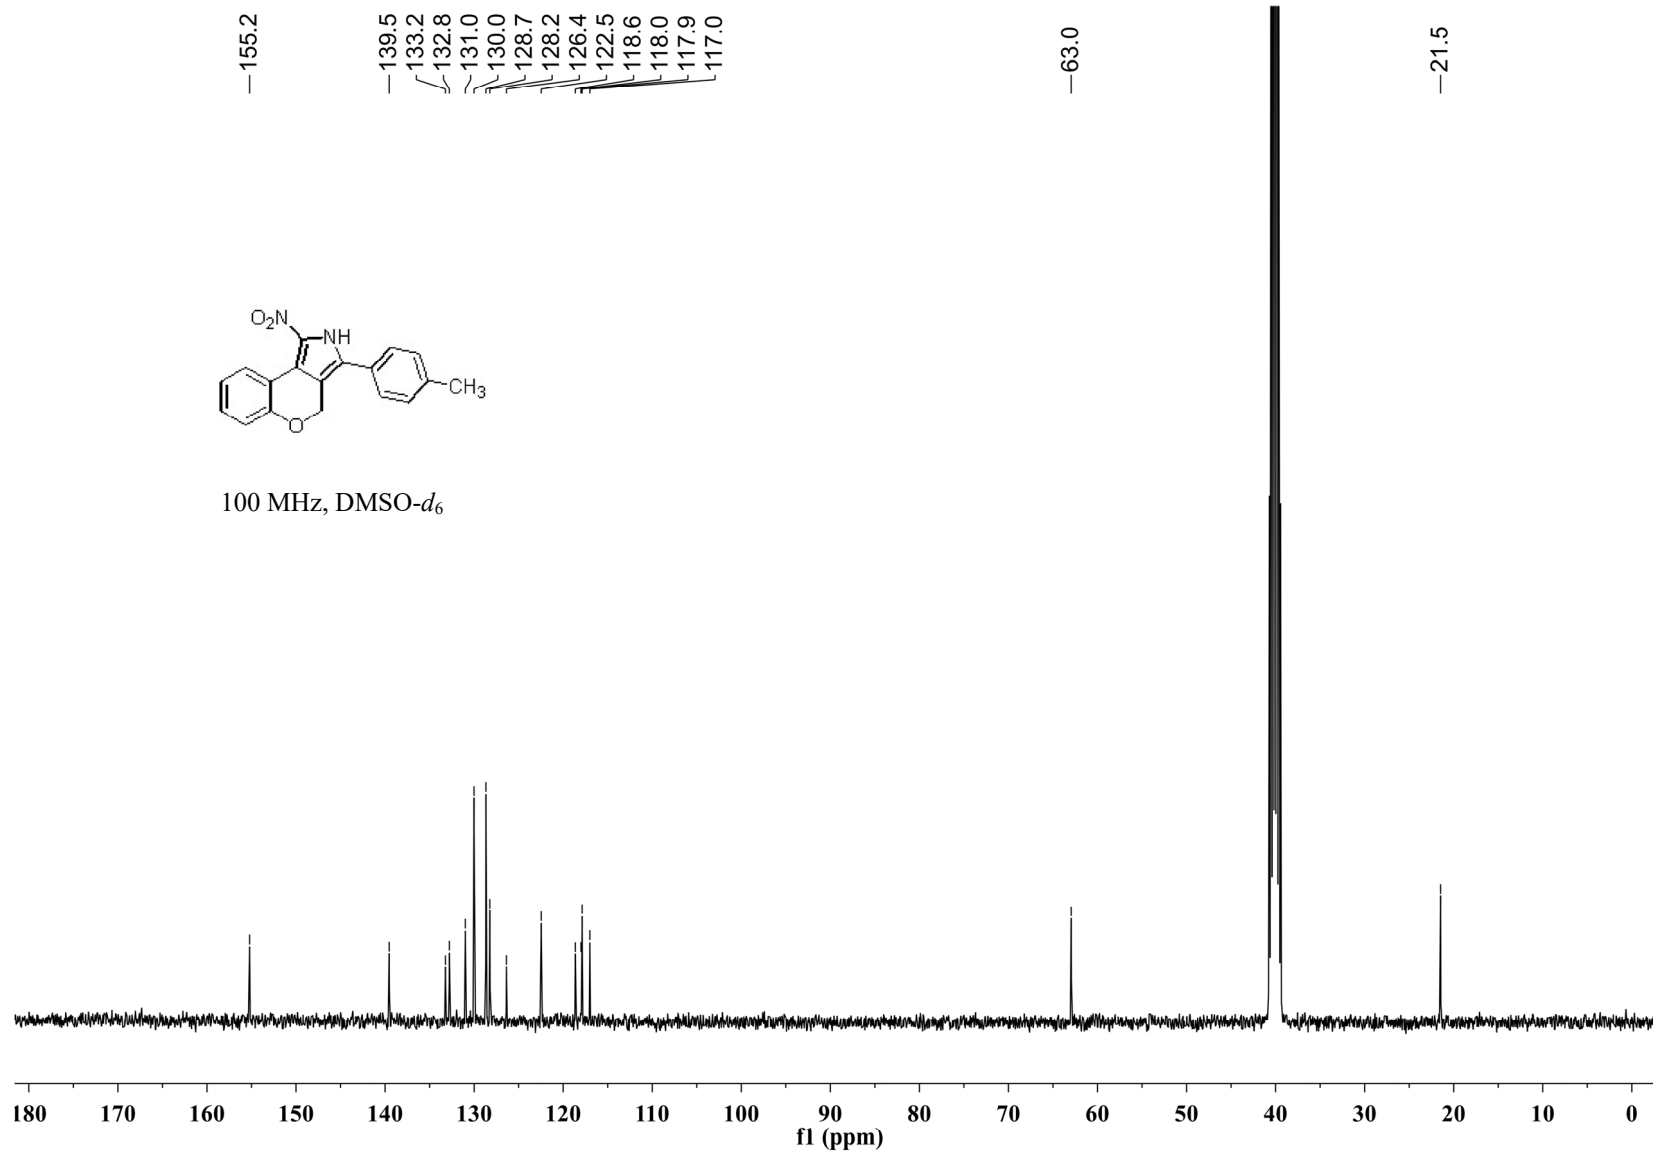

<sup>13</sup>C NMR Spectrum of Compound 5b



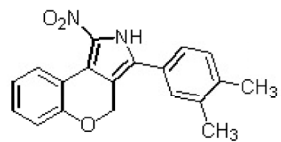

400 MHz, CDCl<sub>3</sub>

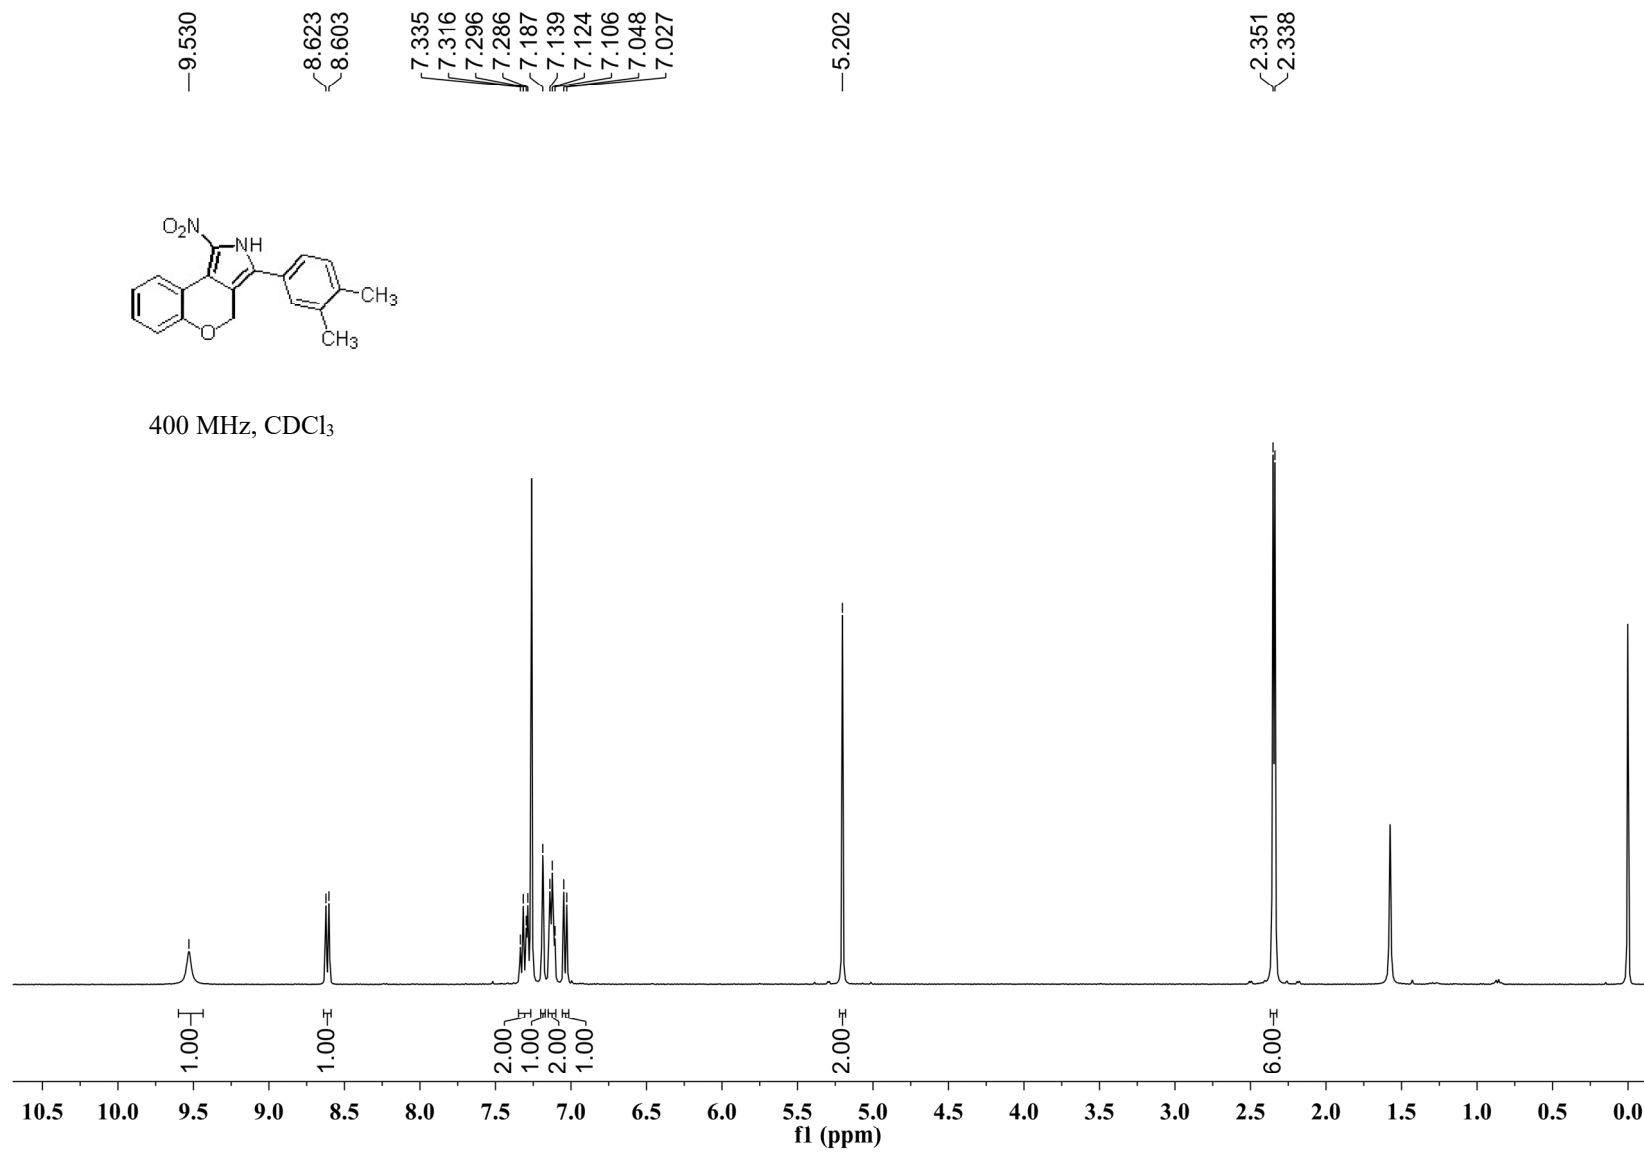

<sup>1</sup>H NMR Spectrum of Compound 5c

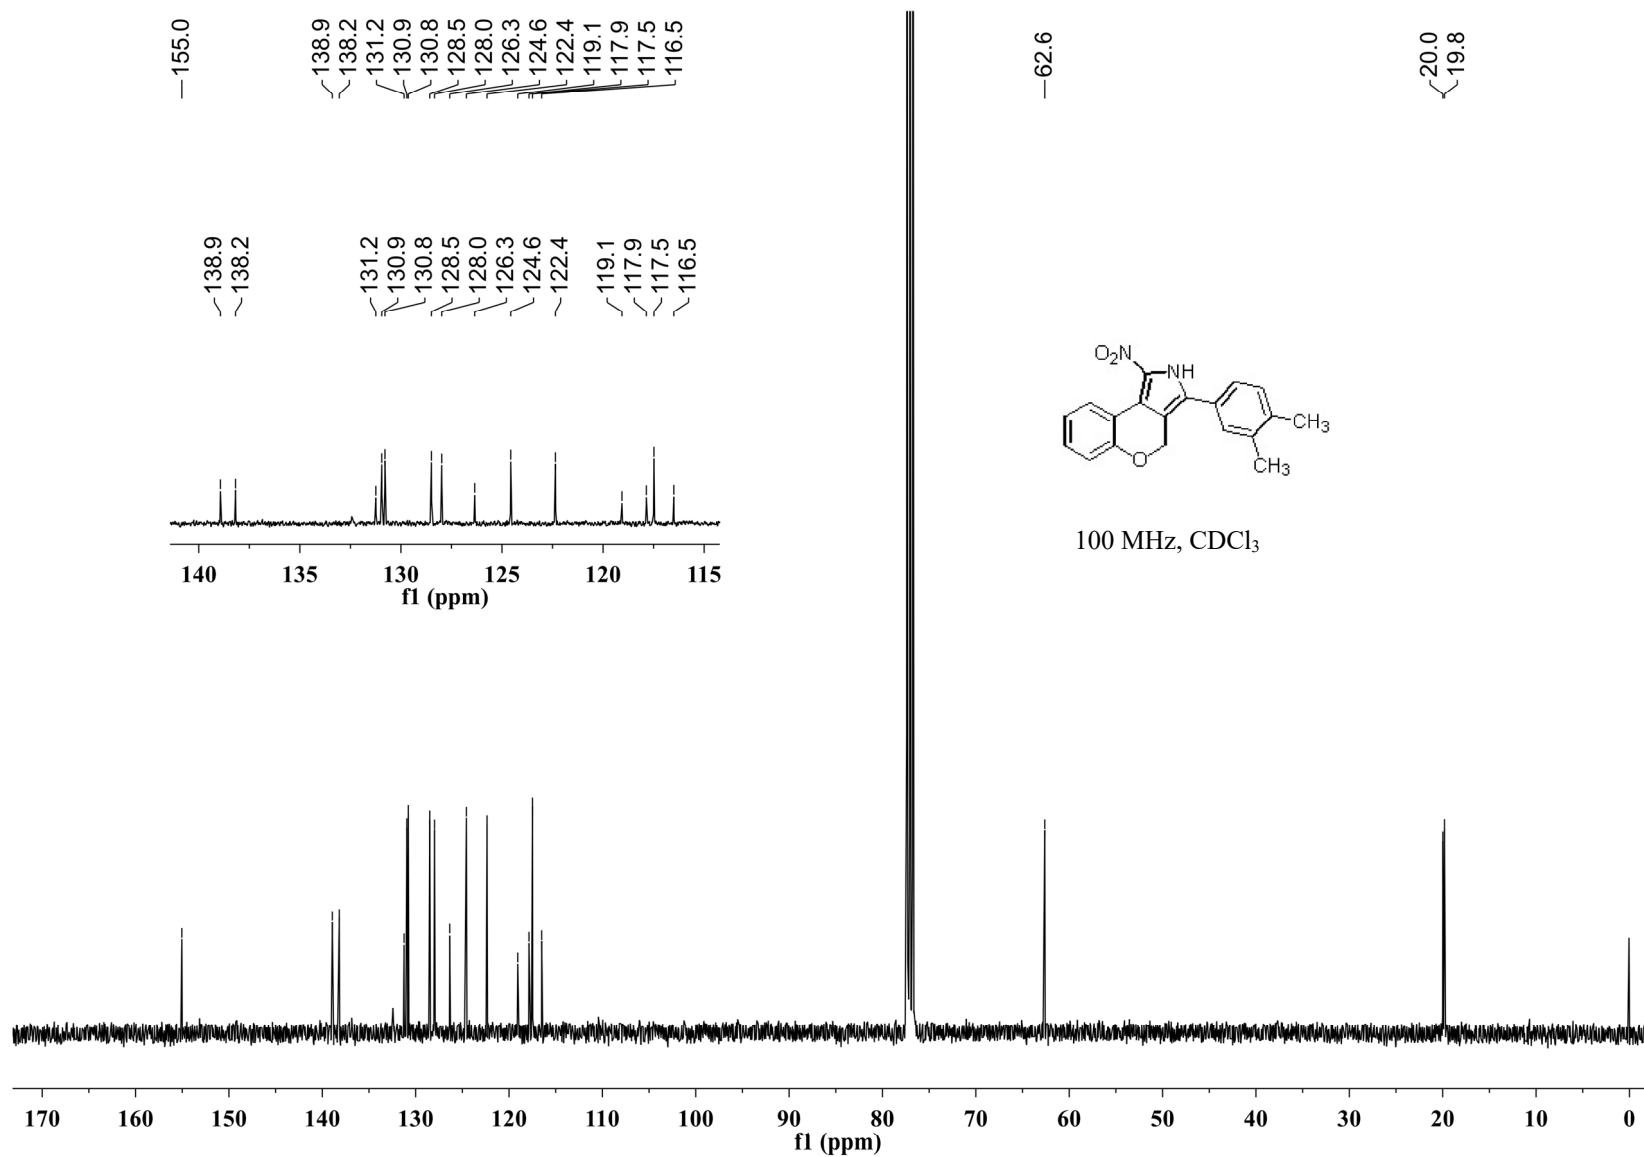

<sup>13</sup>C NMR Spectrum of Compound 5c

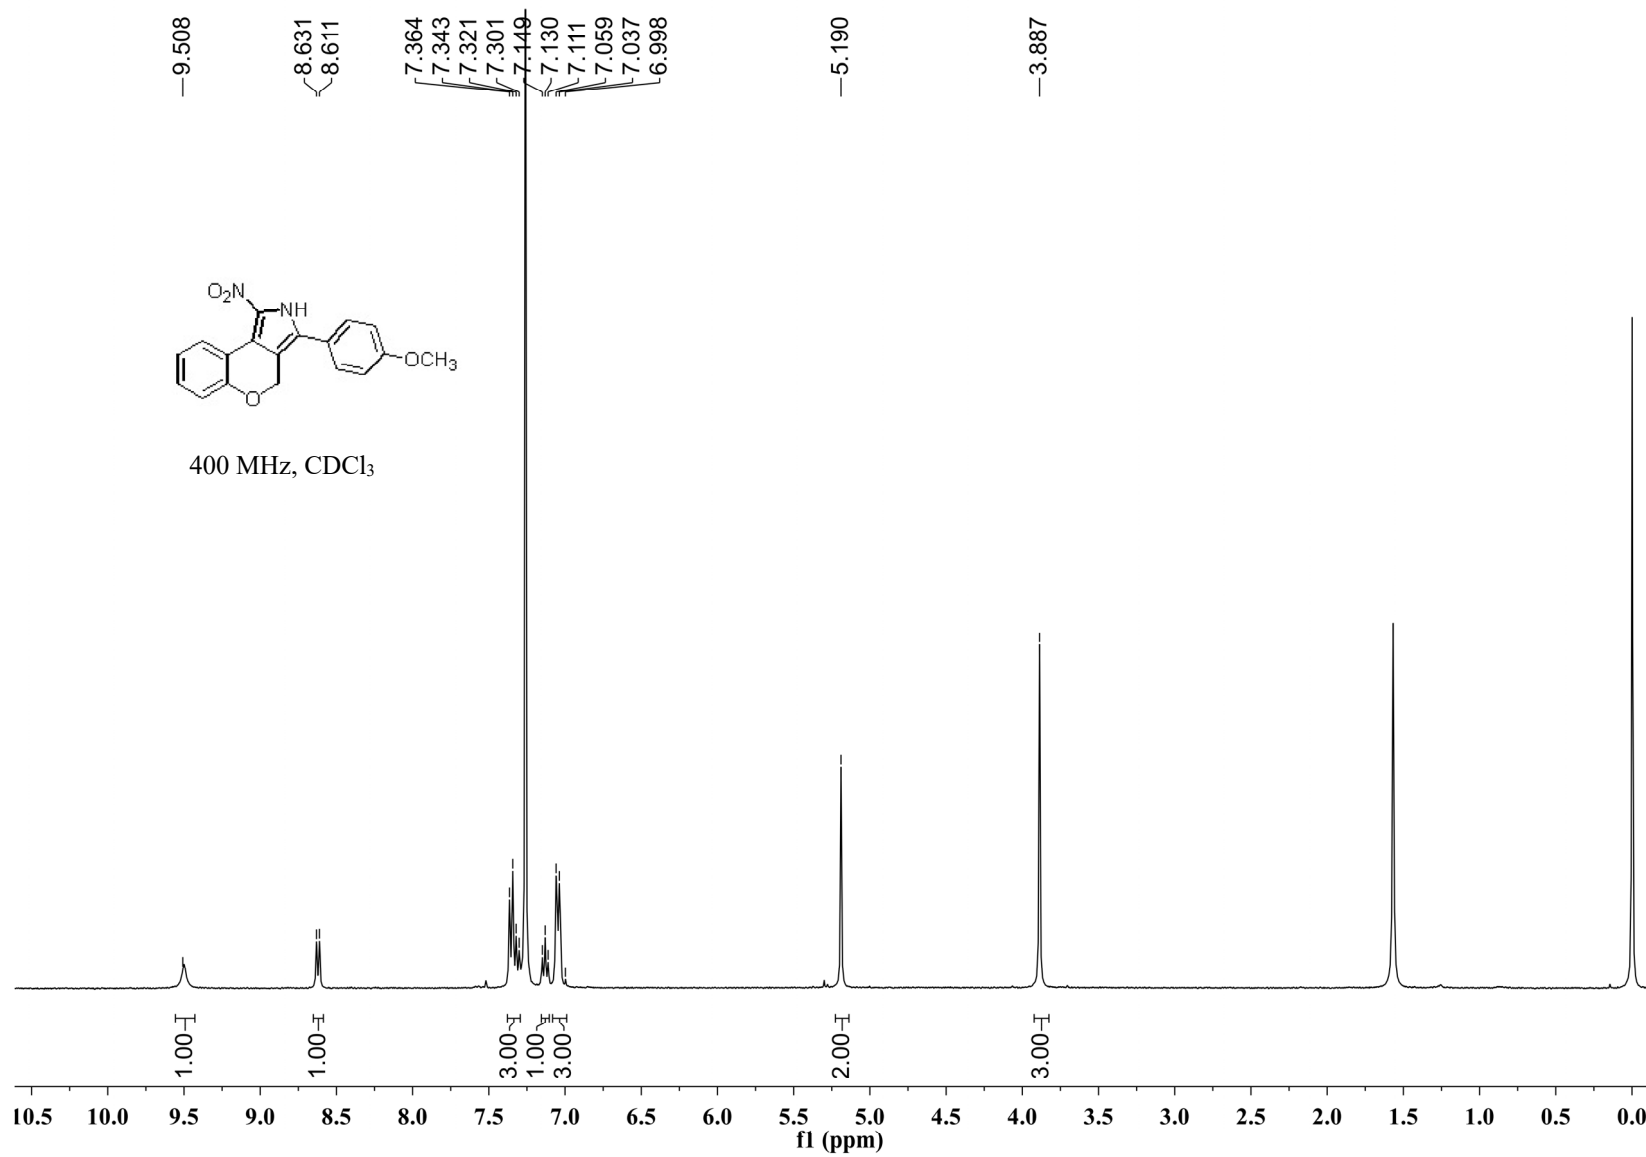

<sup>1</sup>H NMR Spectrum of Compound 5d

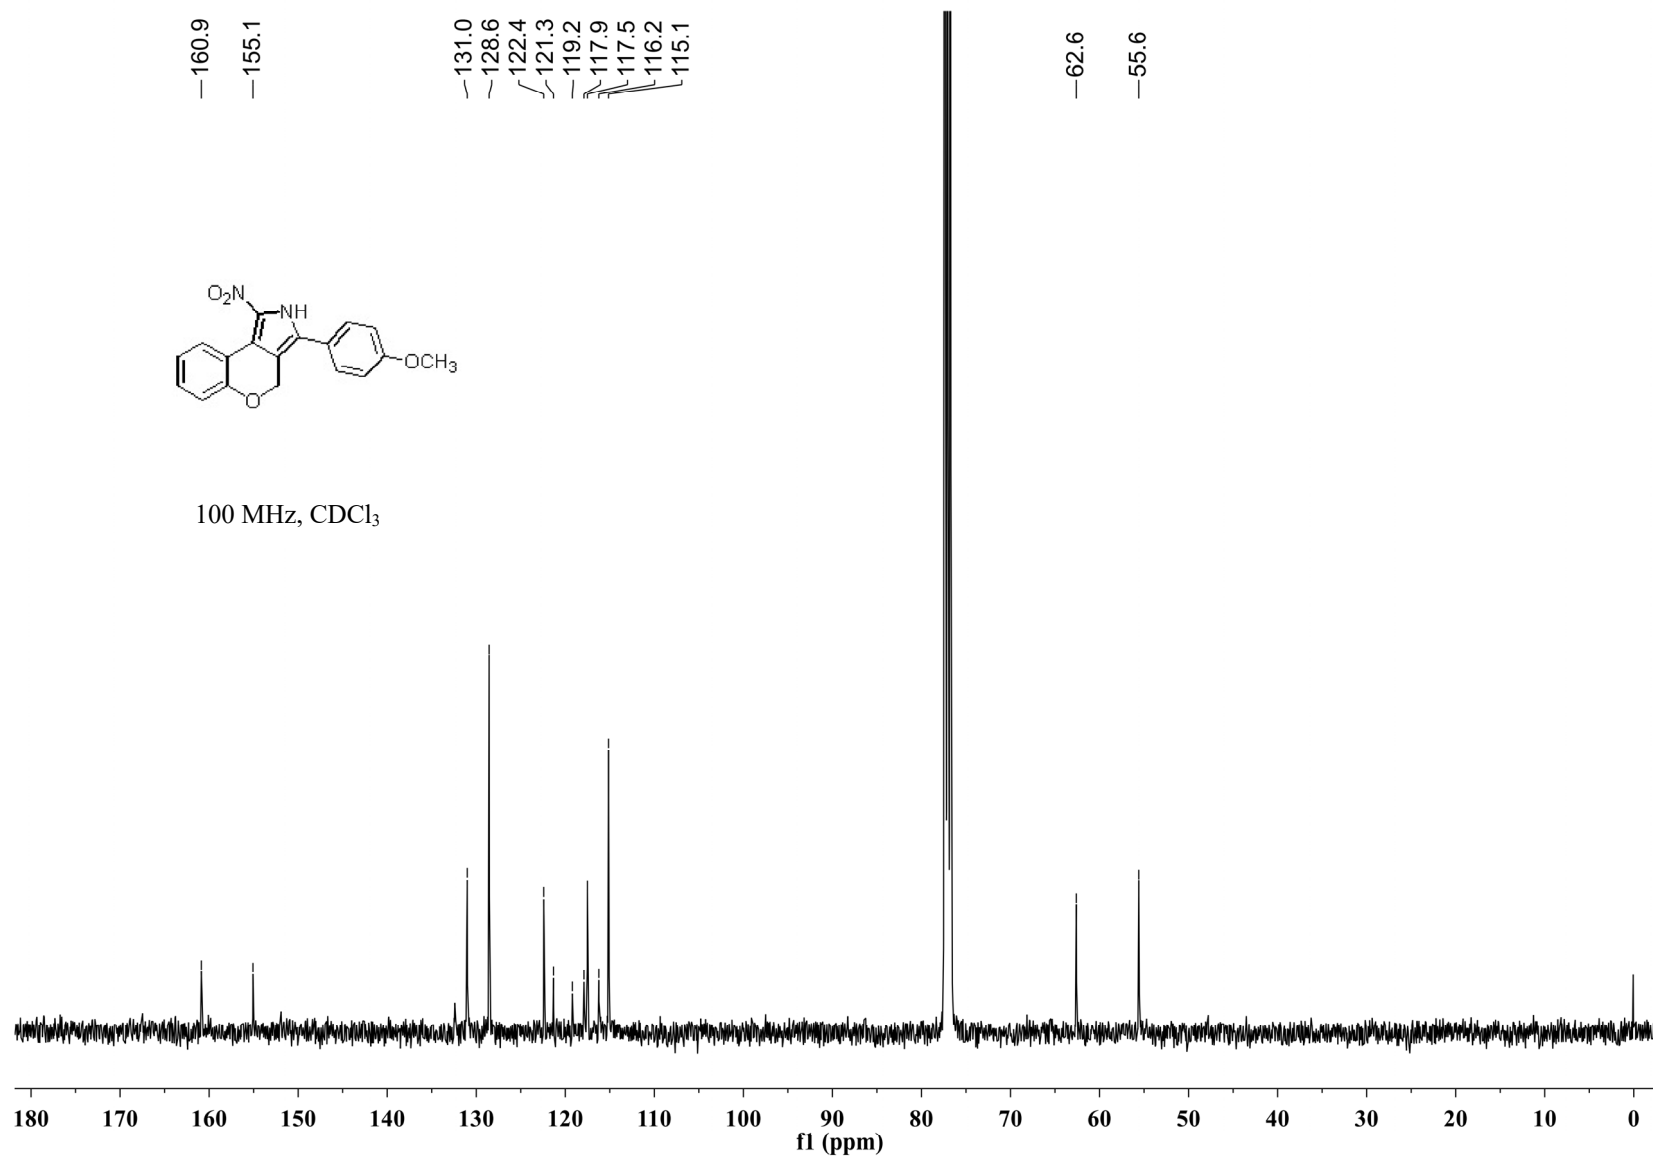

<sup>13</sup>C NMR Spectrum of Compound 5d

—13.399

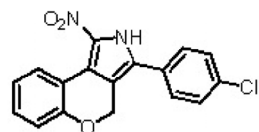

400 MHz, DMSO-*d*<sub>6</sub>

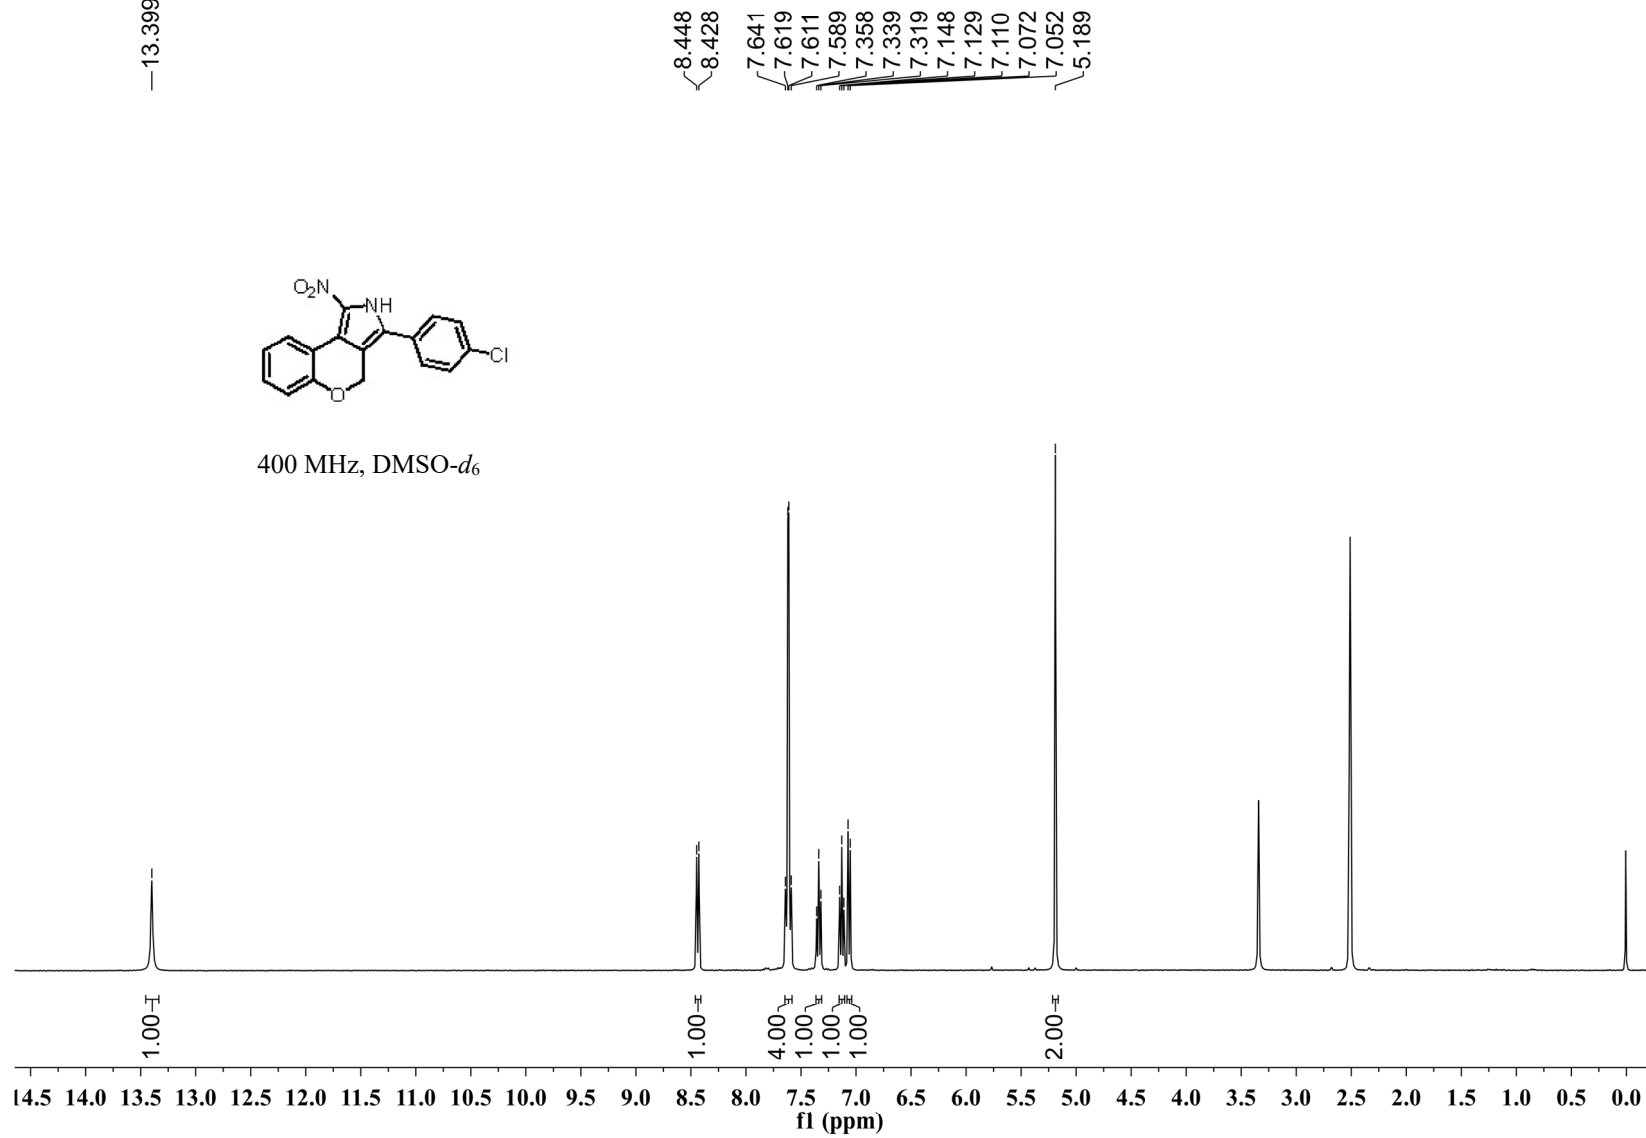

<sup>1</sup>H NMR Spectrum of Compound 5e

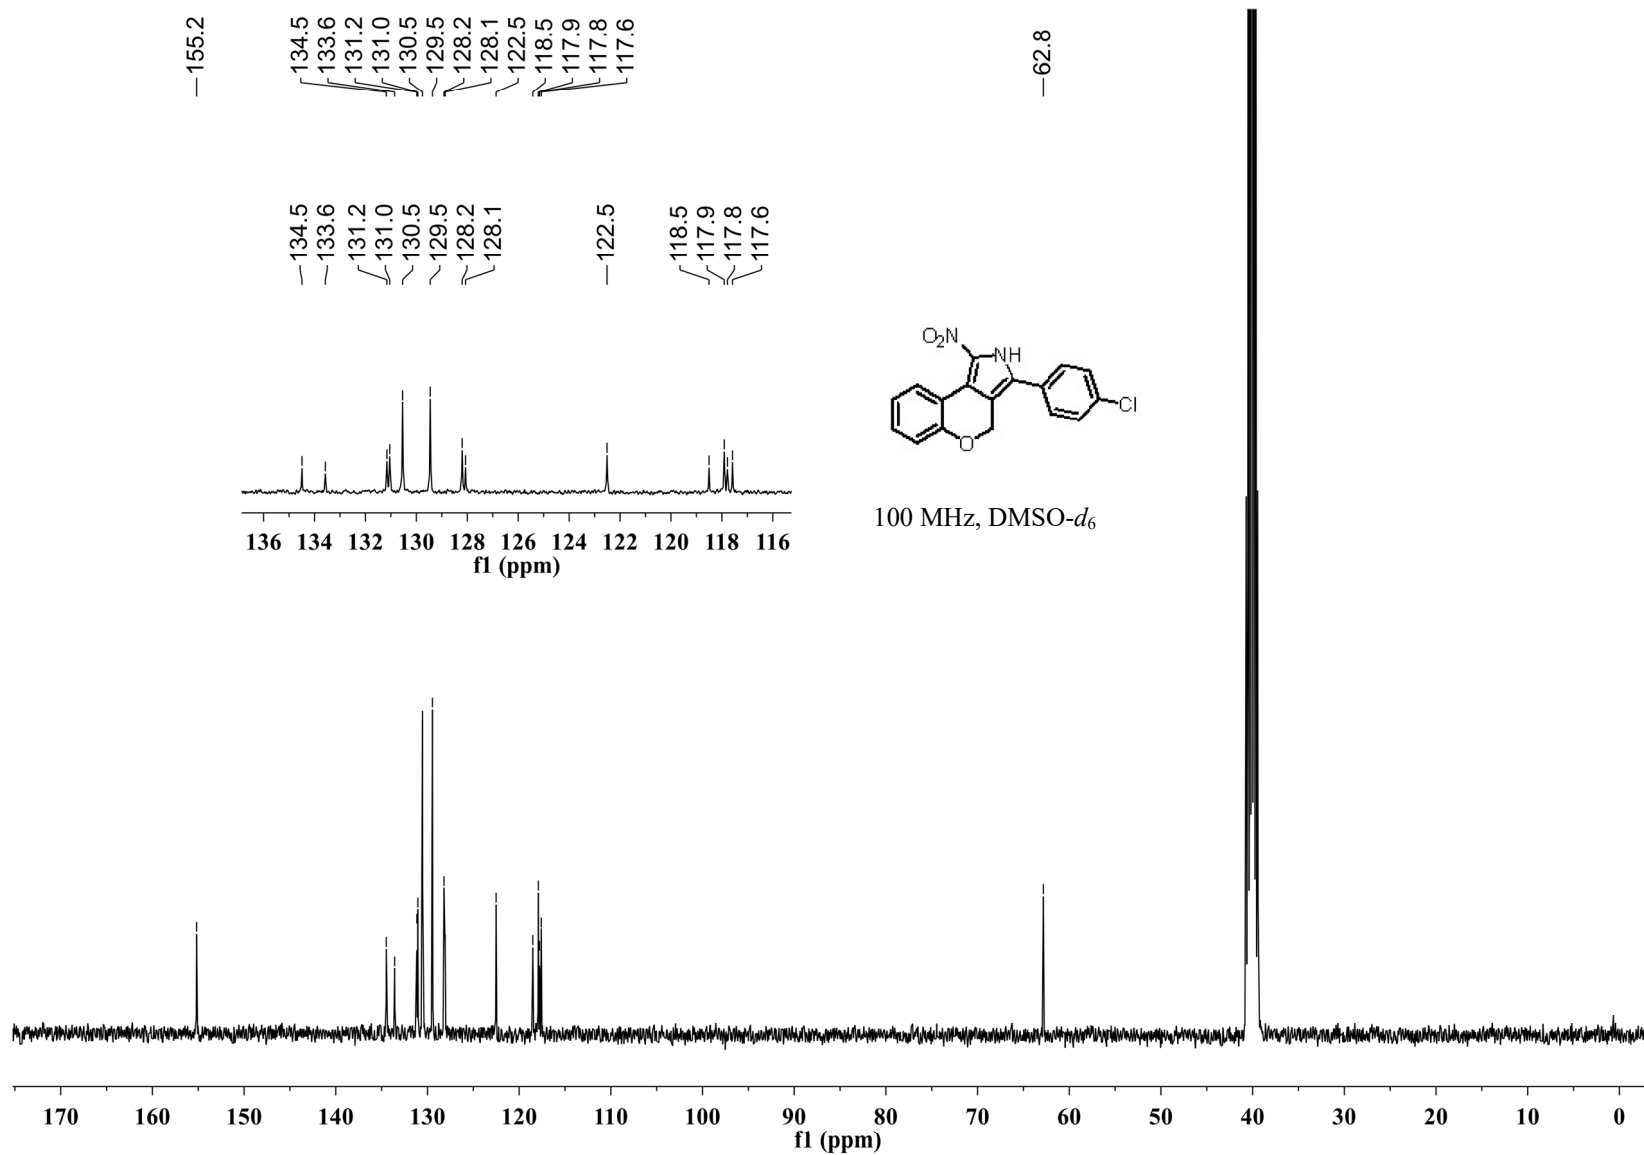

<sup>13</sup>C NMR Spectrum of Compound 5e

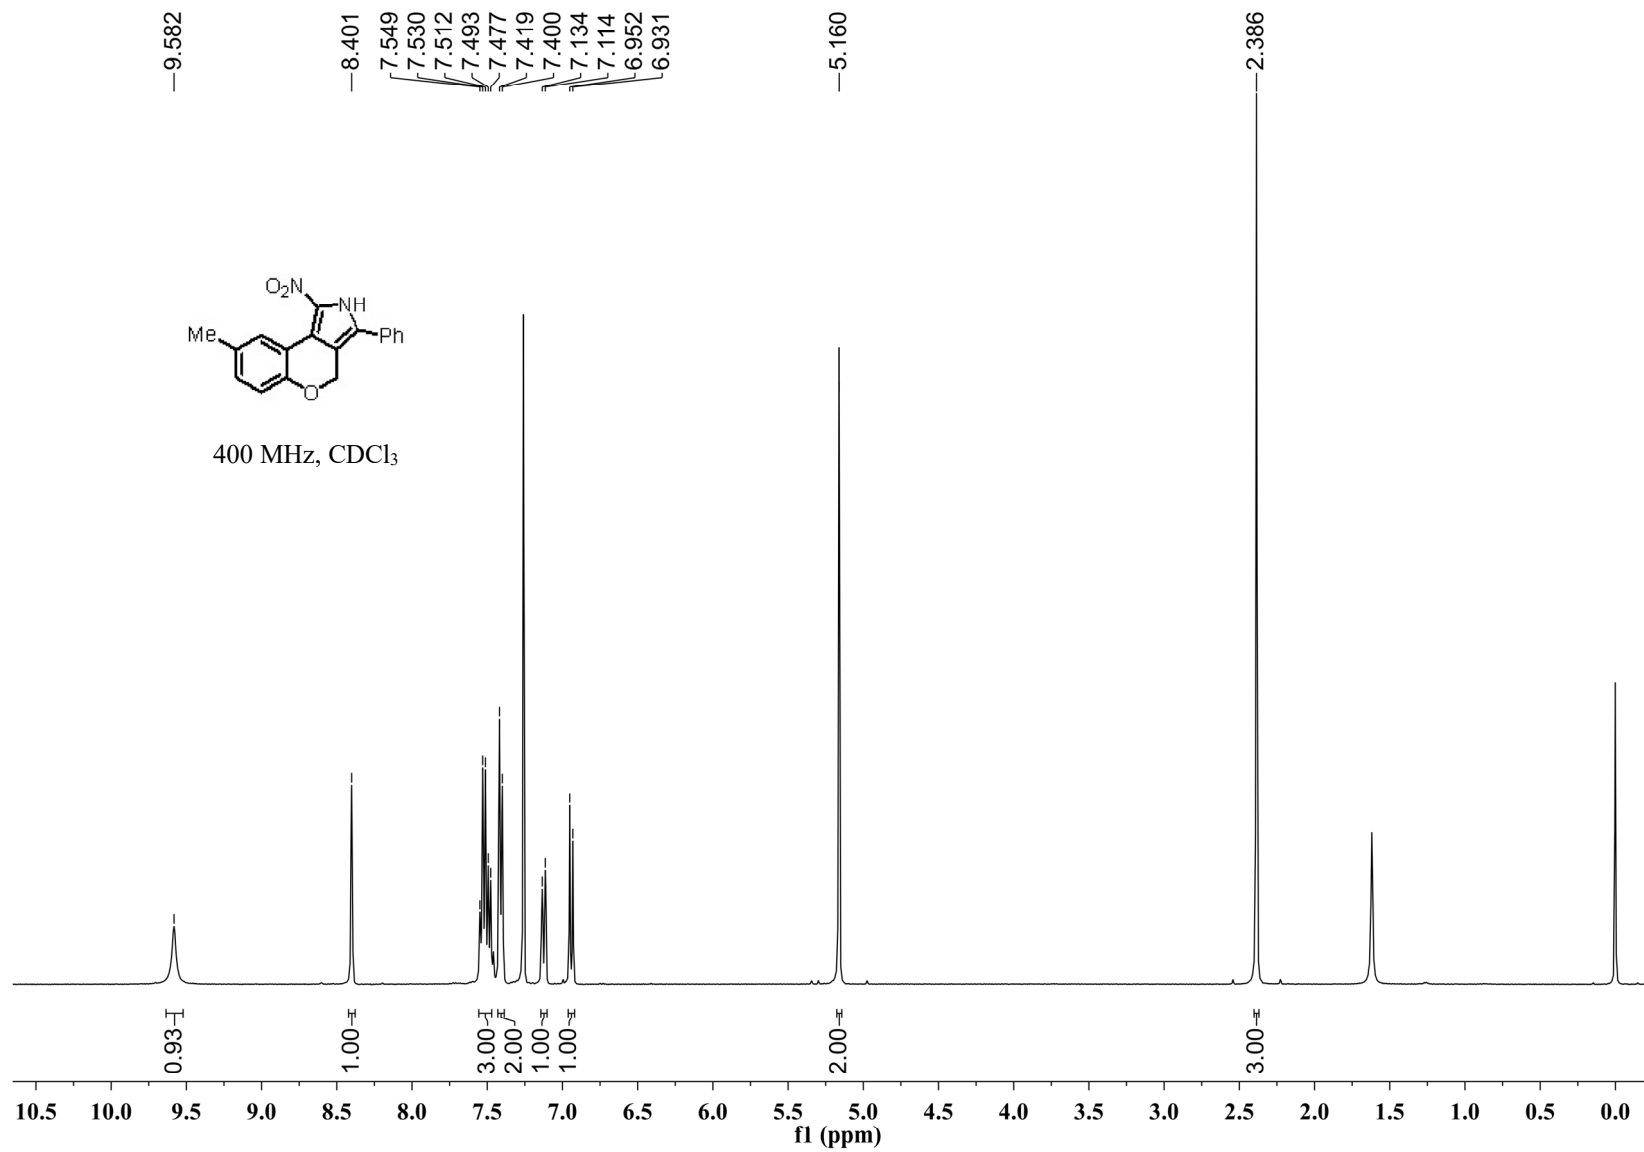

<sup>1</sup>H NMR Spectrum of Compound 5f

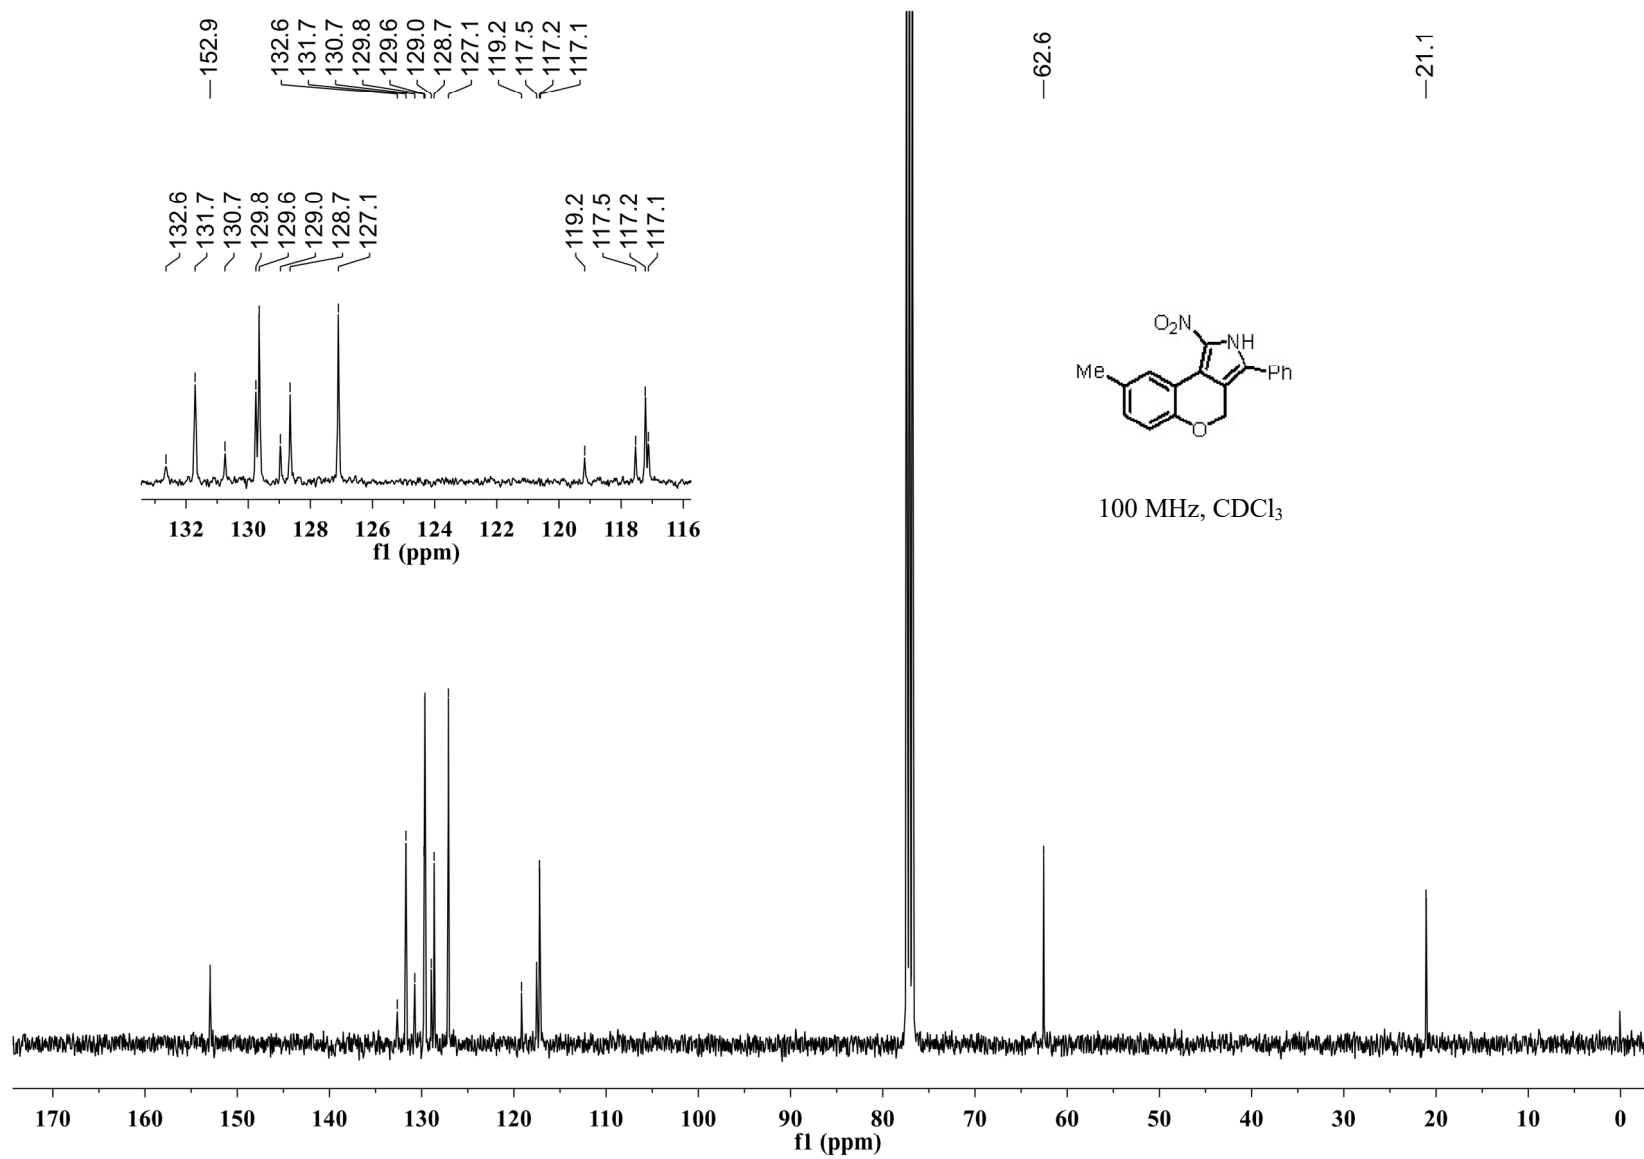

<sup>13</sup>C NMR Spectrum of Compound 5f



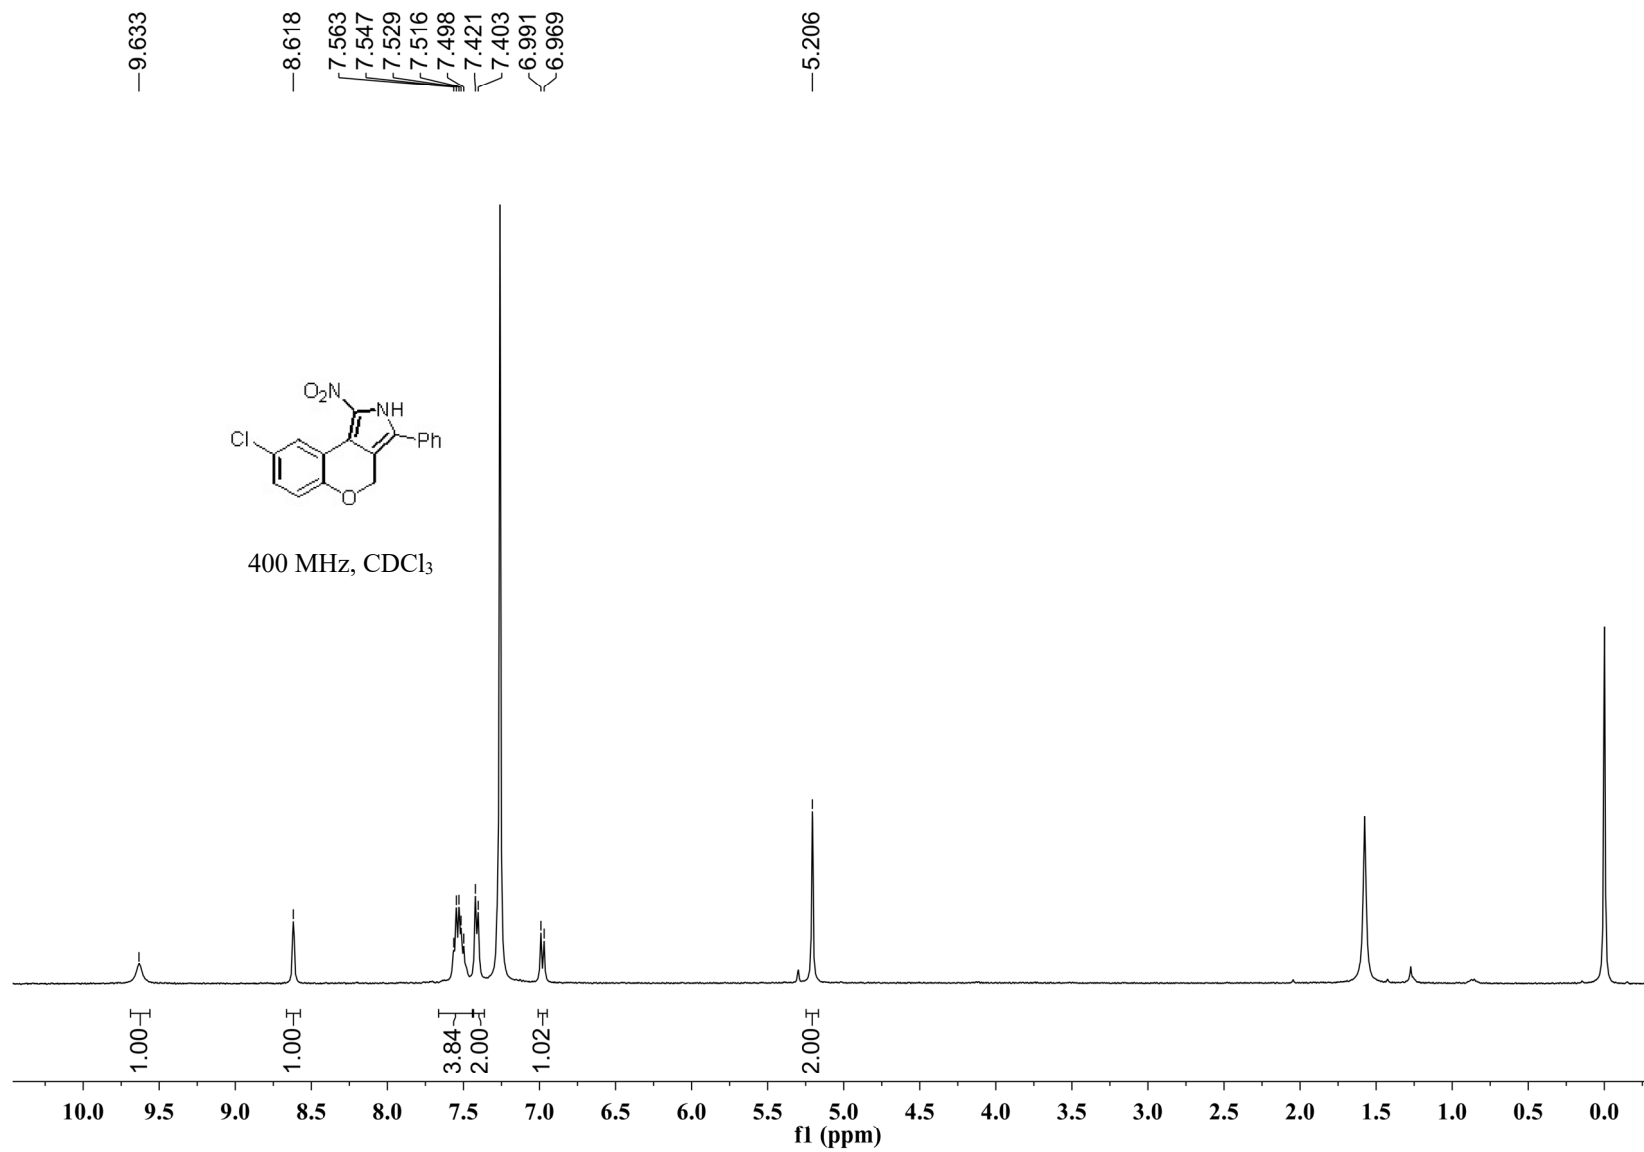

<sup>1</sup>H NMR Spectrum of Compound 5g

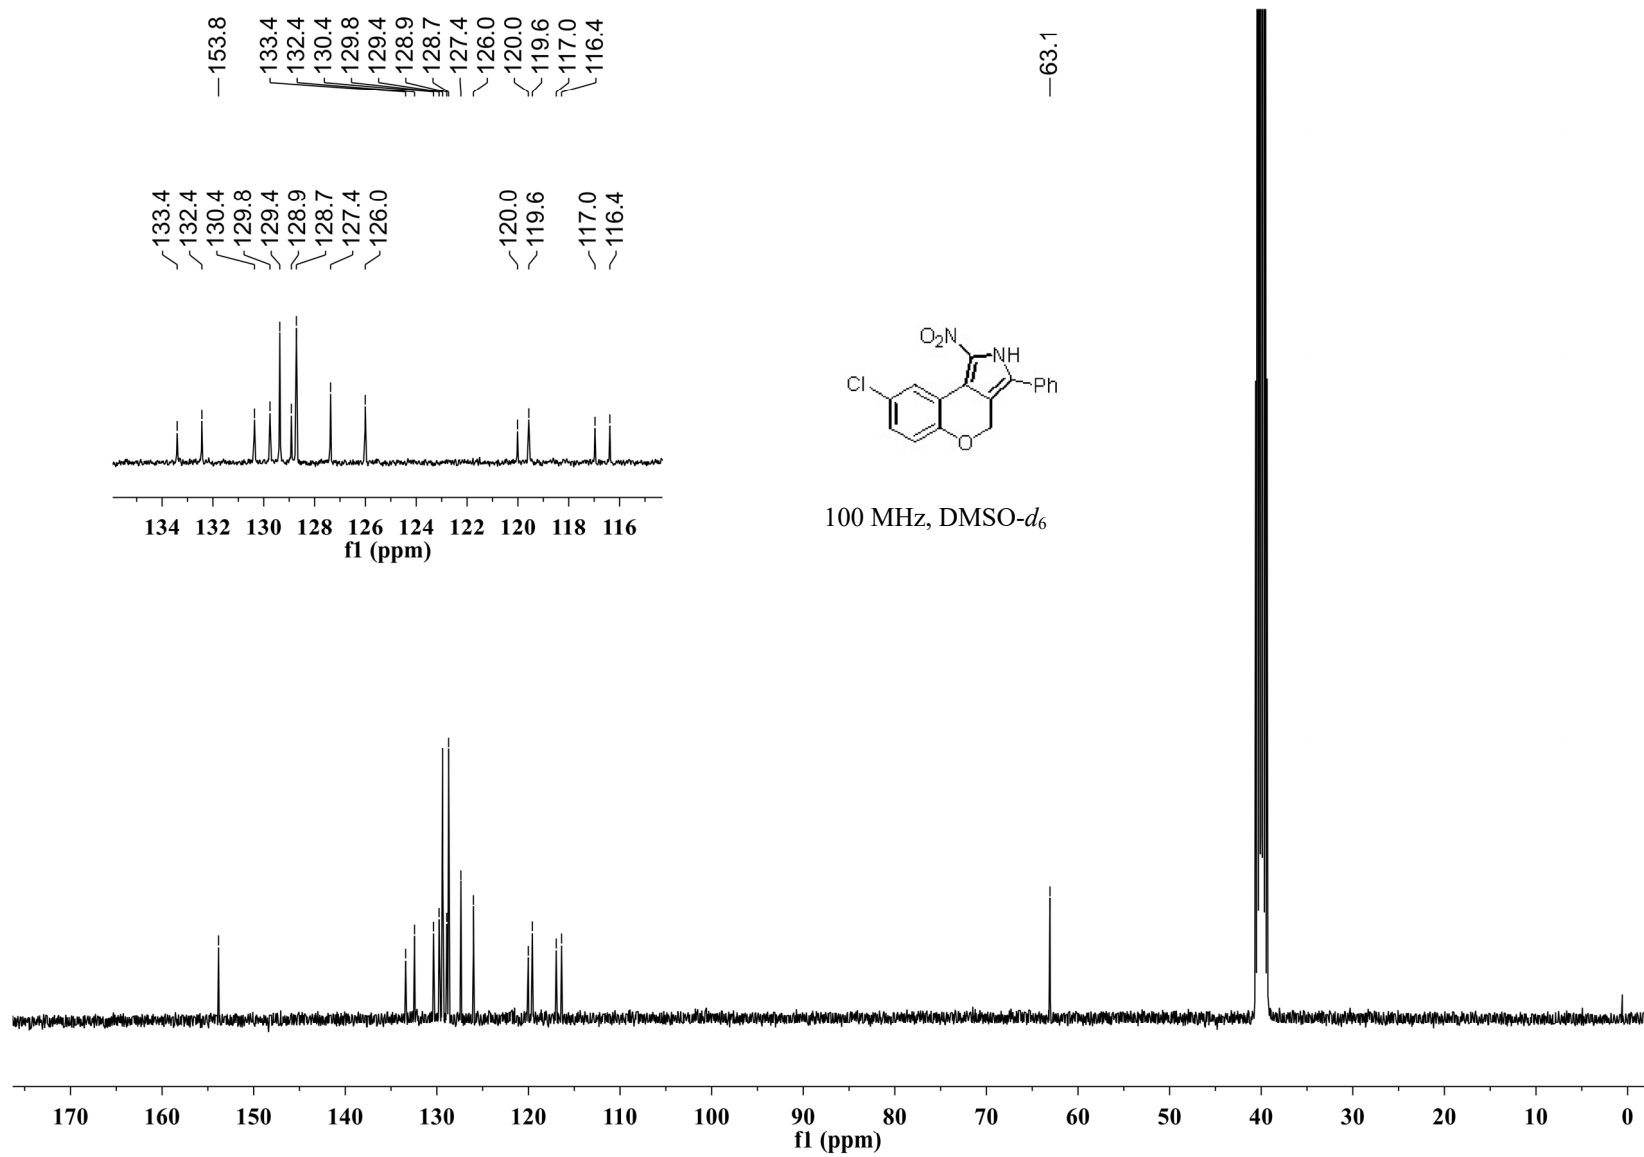

<sup>13</sup>C NMR Spectrum of Compound 5g

—13.068

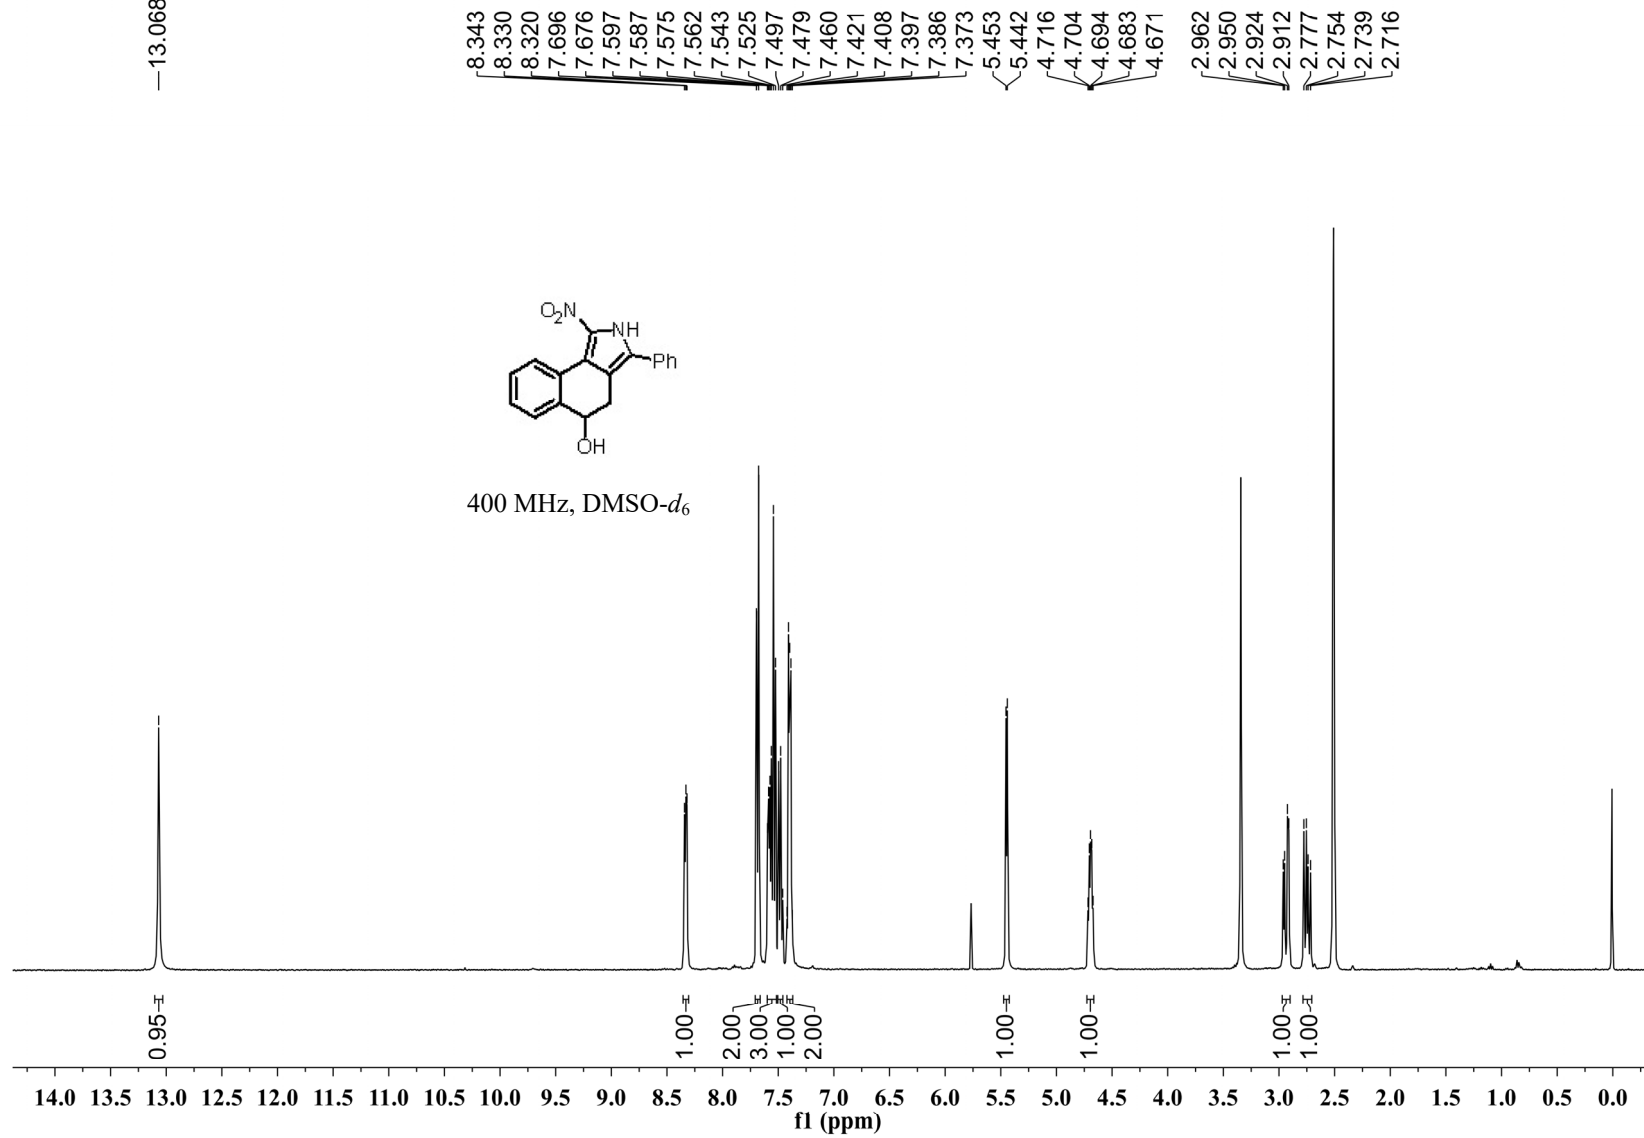

<sup>1</sup>H NMR Spectrum of Compound 7a

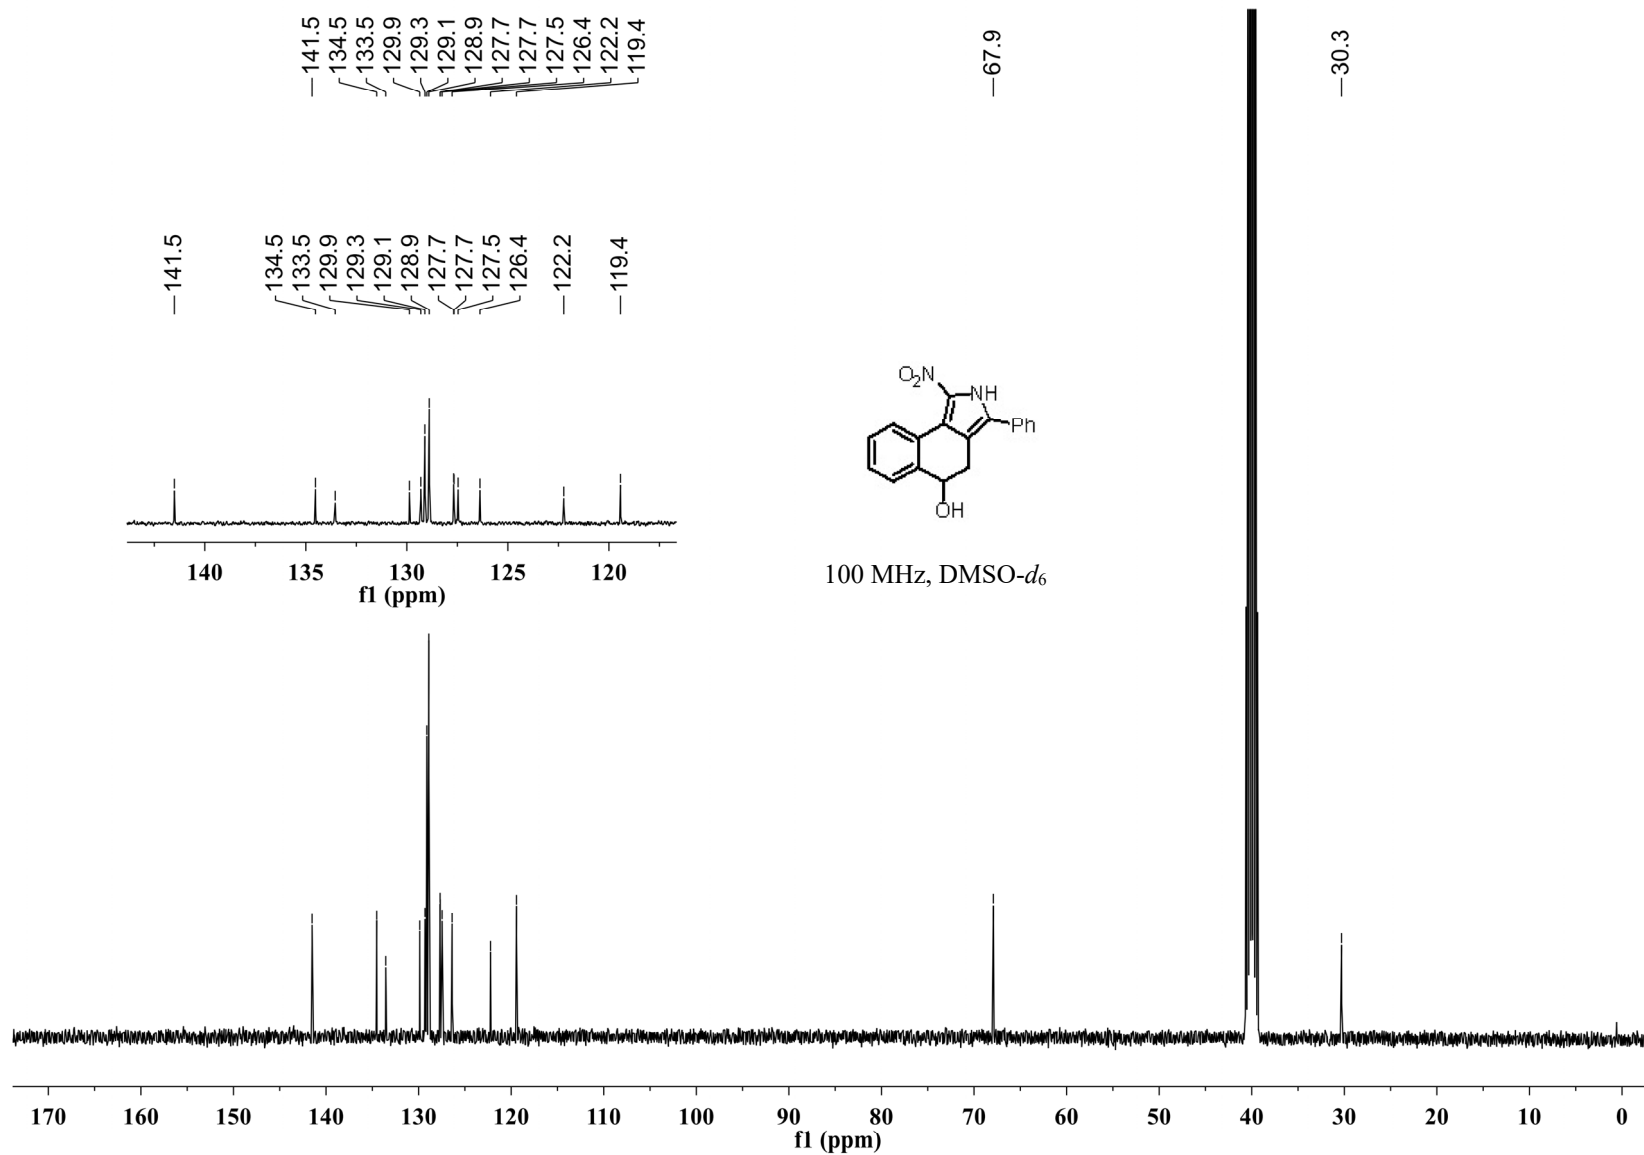

<sup>13</sup>C NMR Spectrum of Compound 7a

—13.004

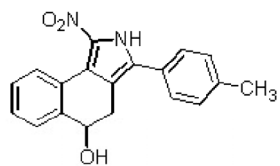

400 MHz, DMSO-*d*<sub>6</sub>

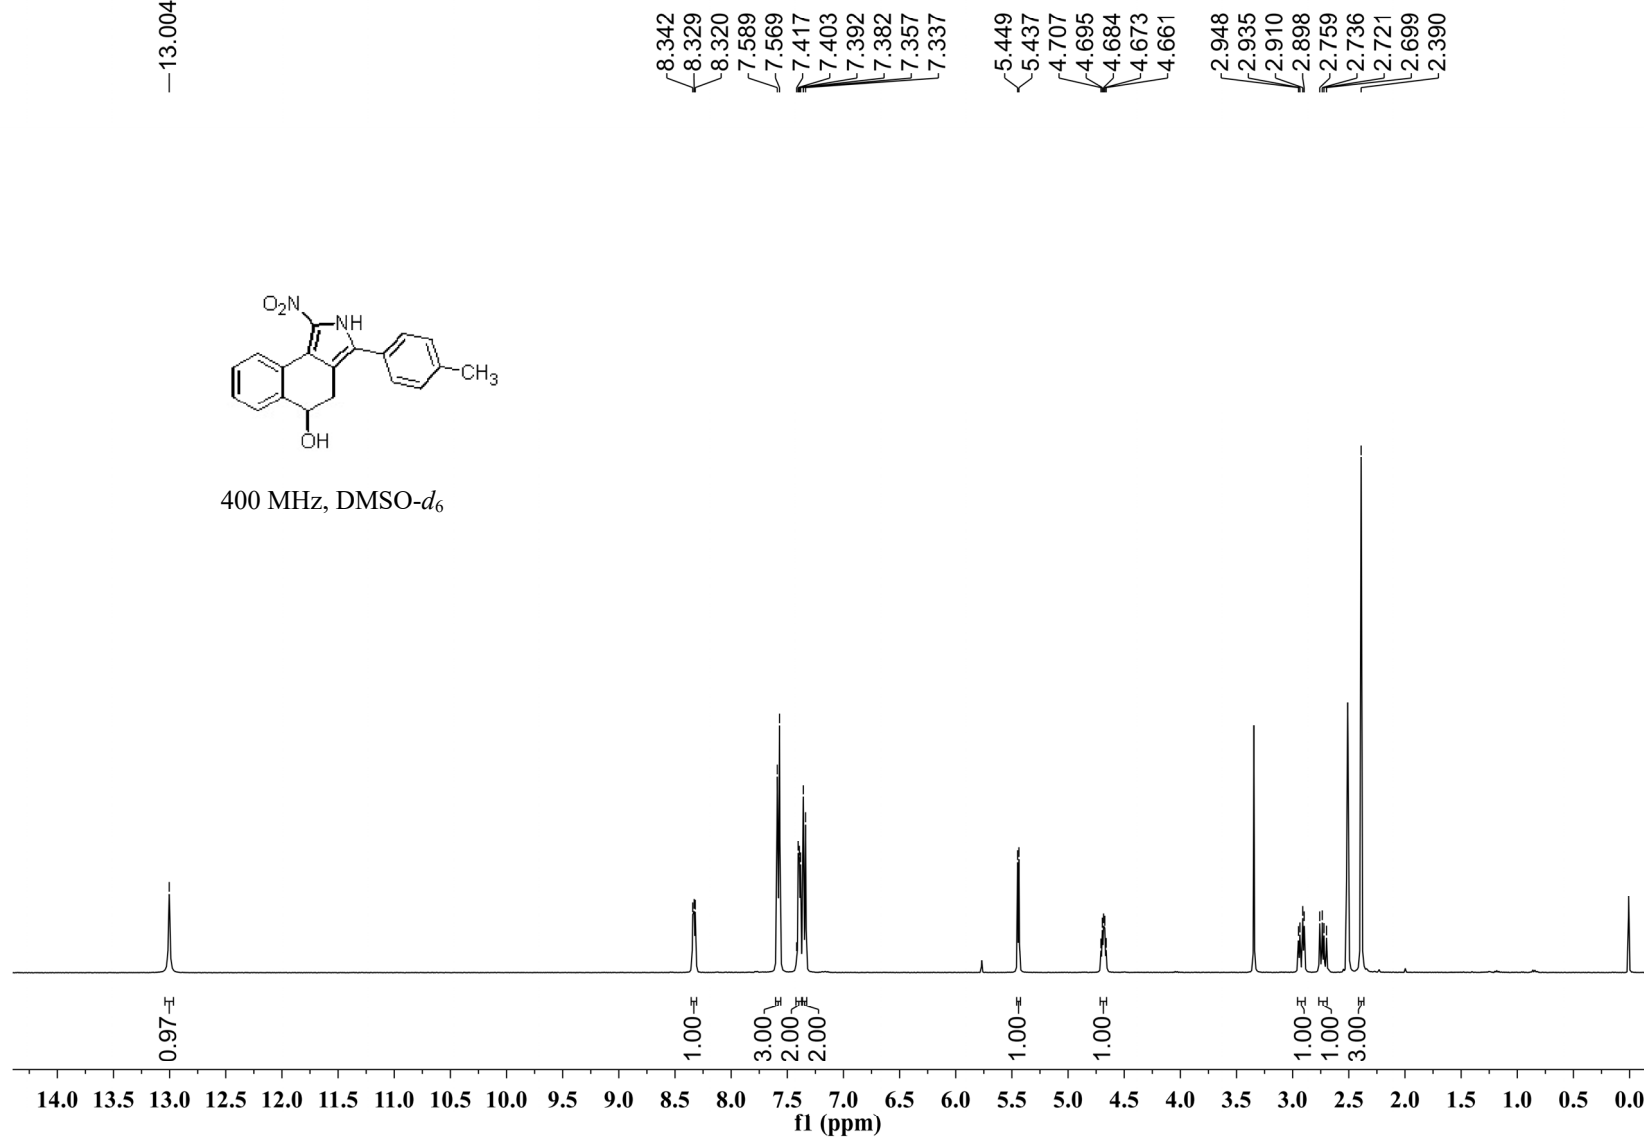

<sup>1</sup>H NMR Spectrum of Compound 7b

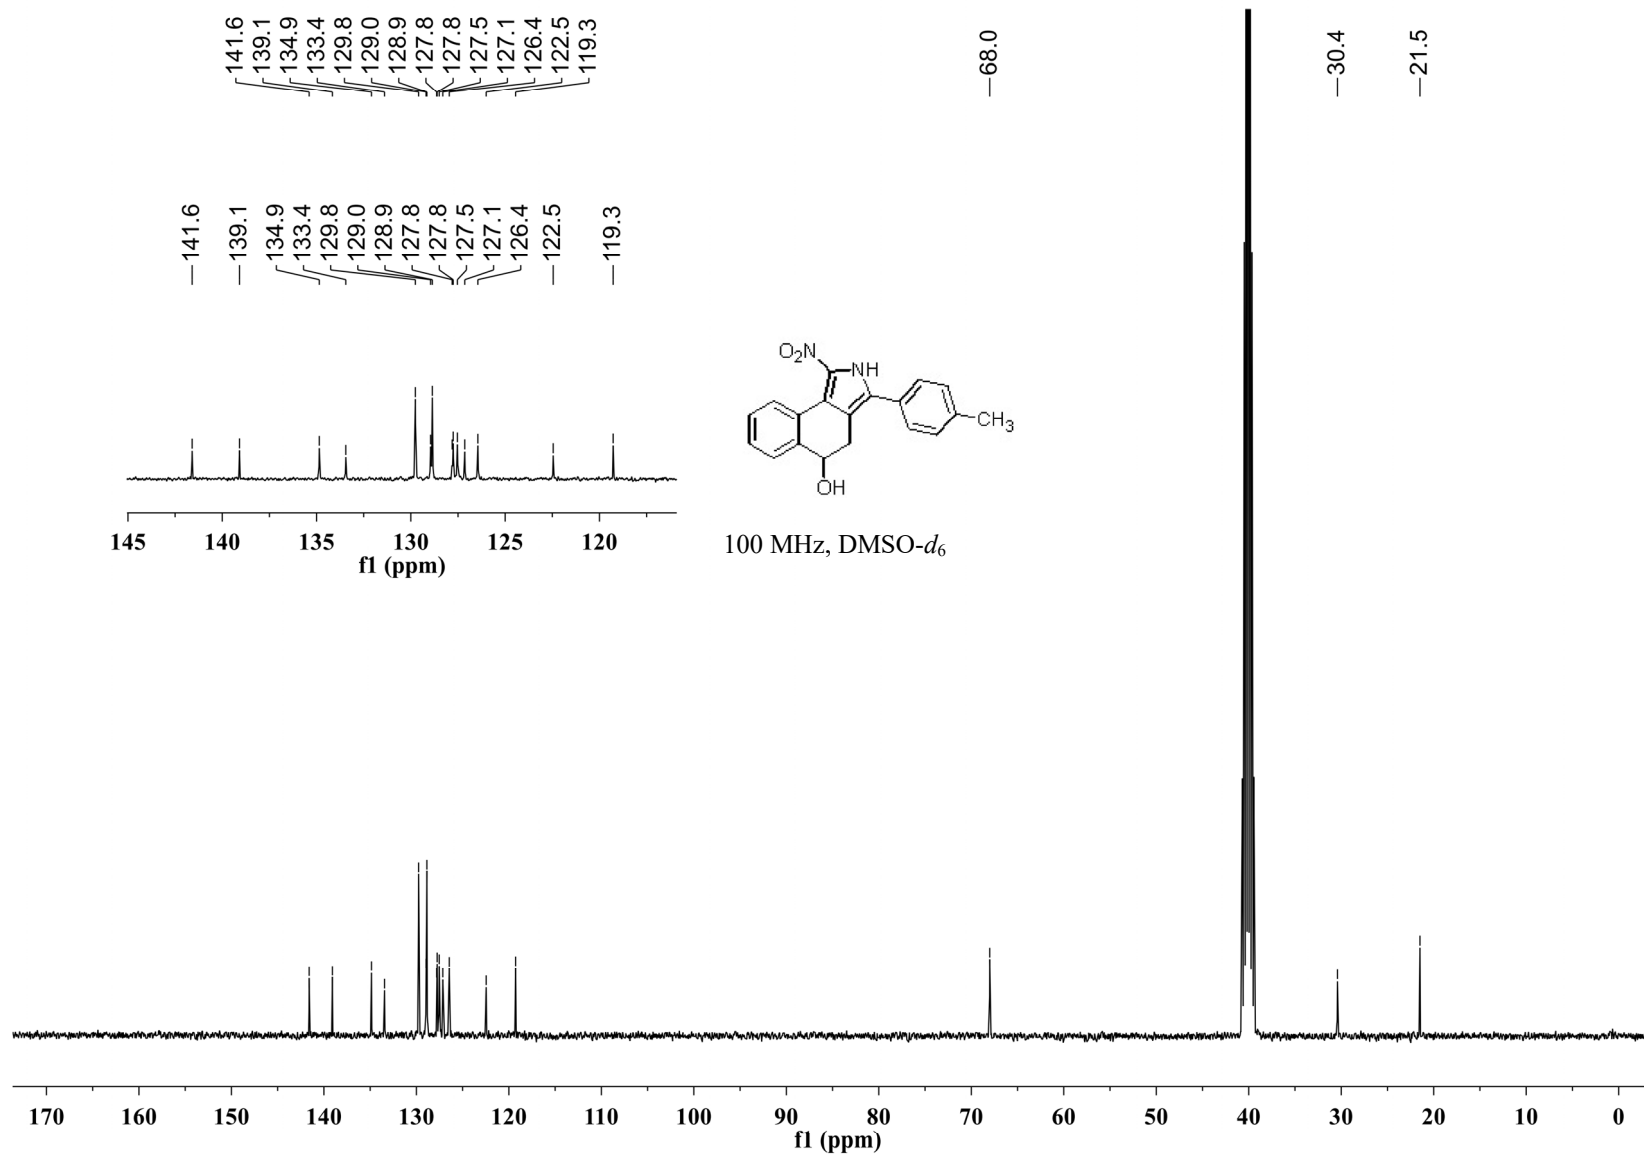

**<sup>13</sup>C NMR Spectrum of Compound 7b**

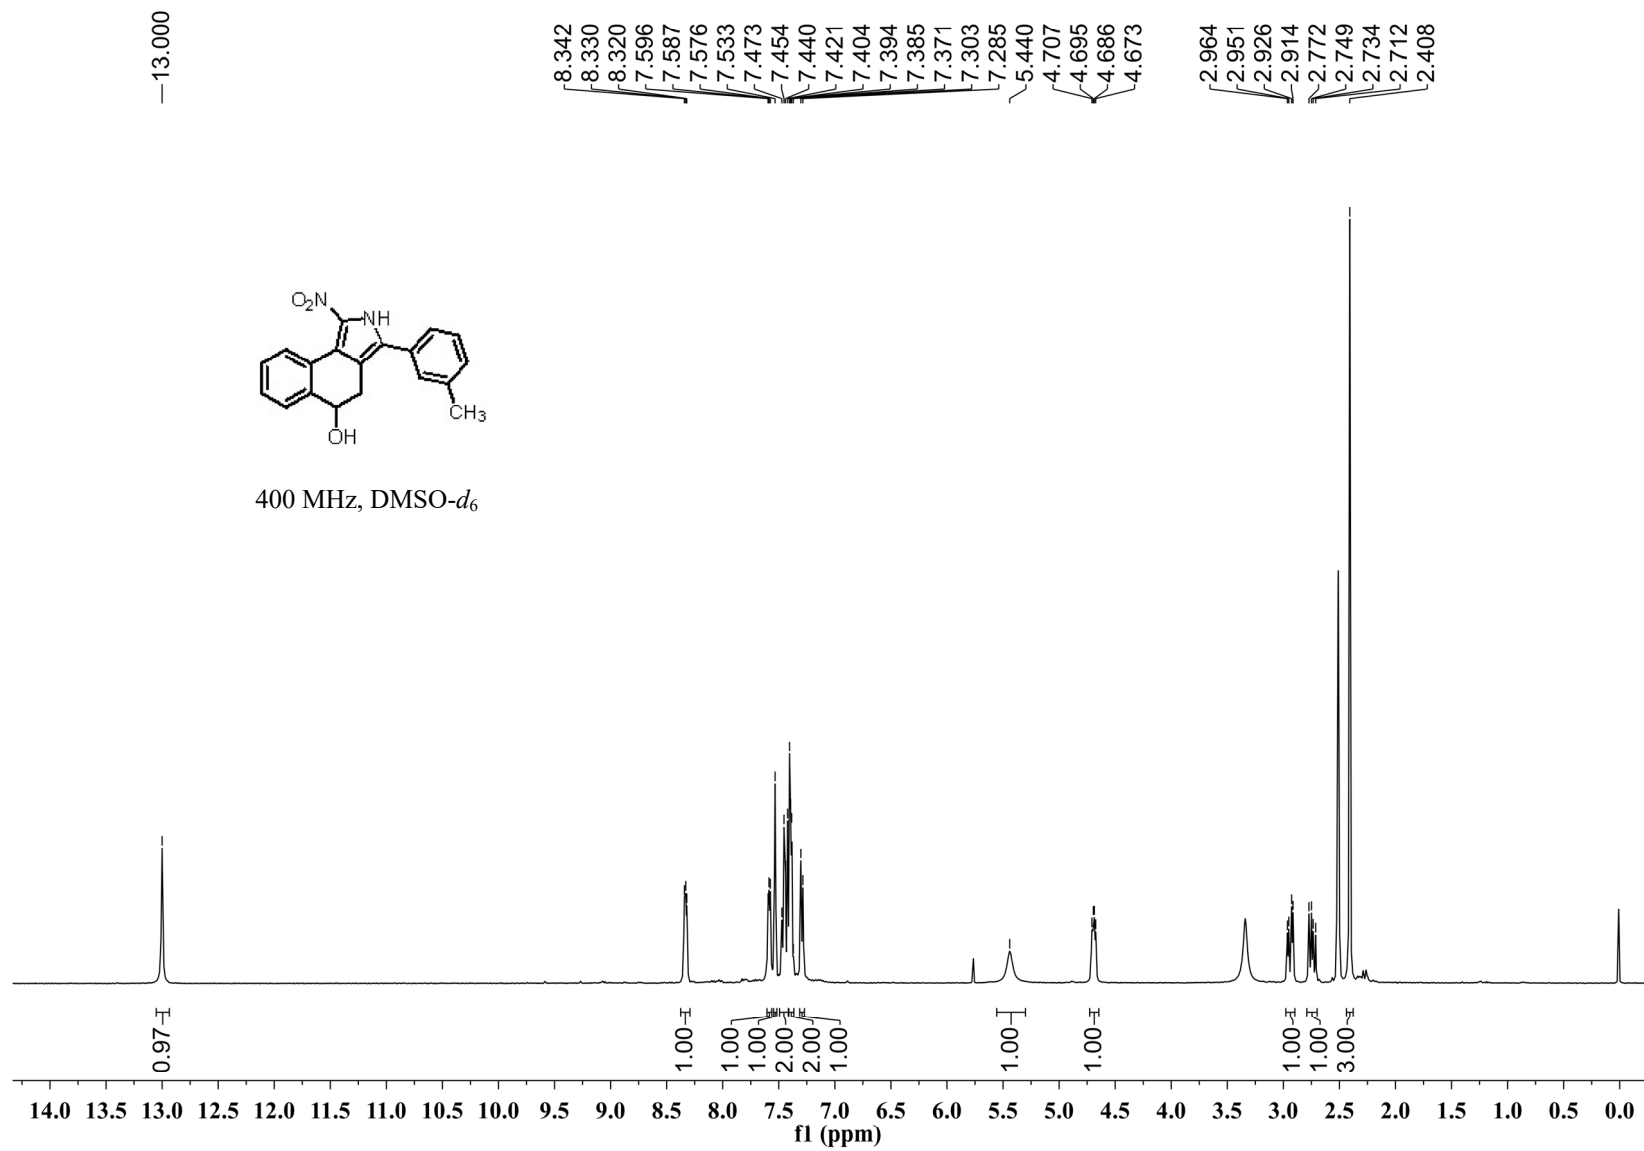

<sup>1</sup>H NMR Spectrum of Compound 7c

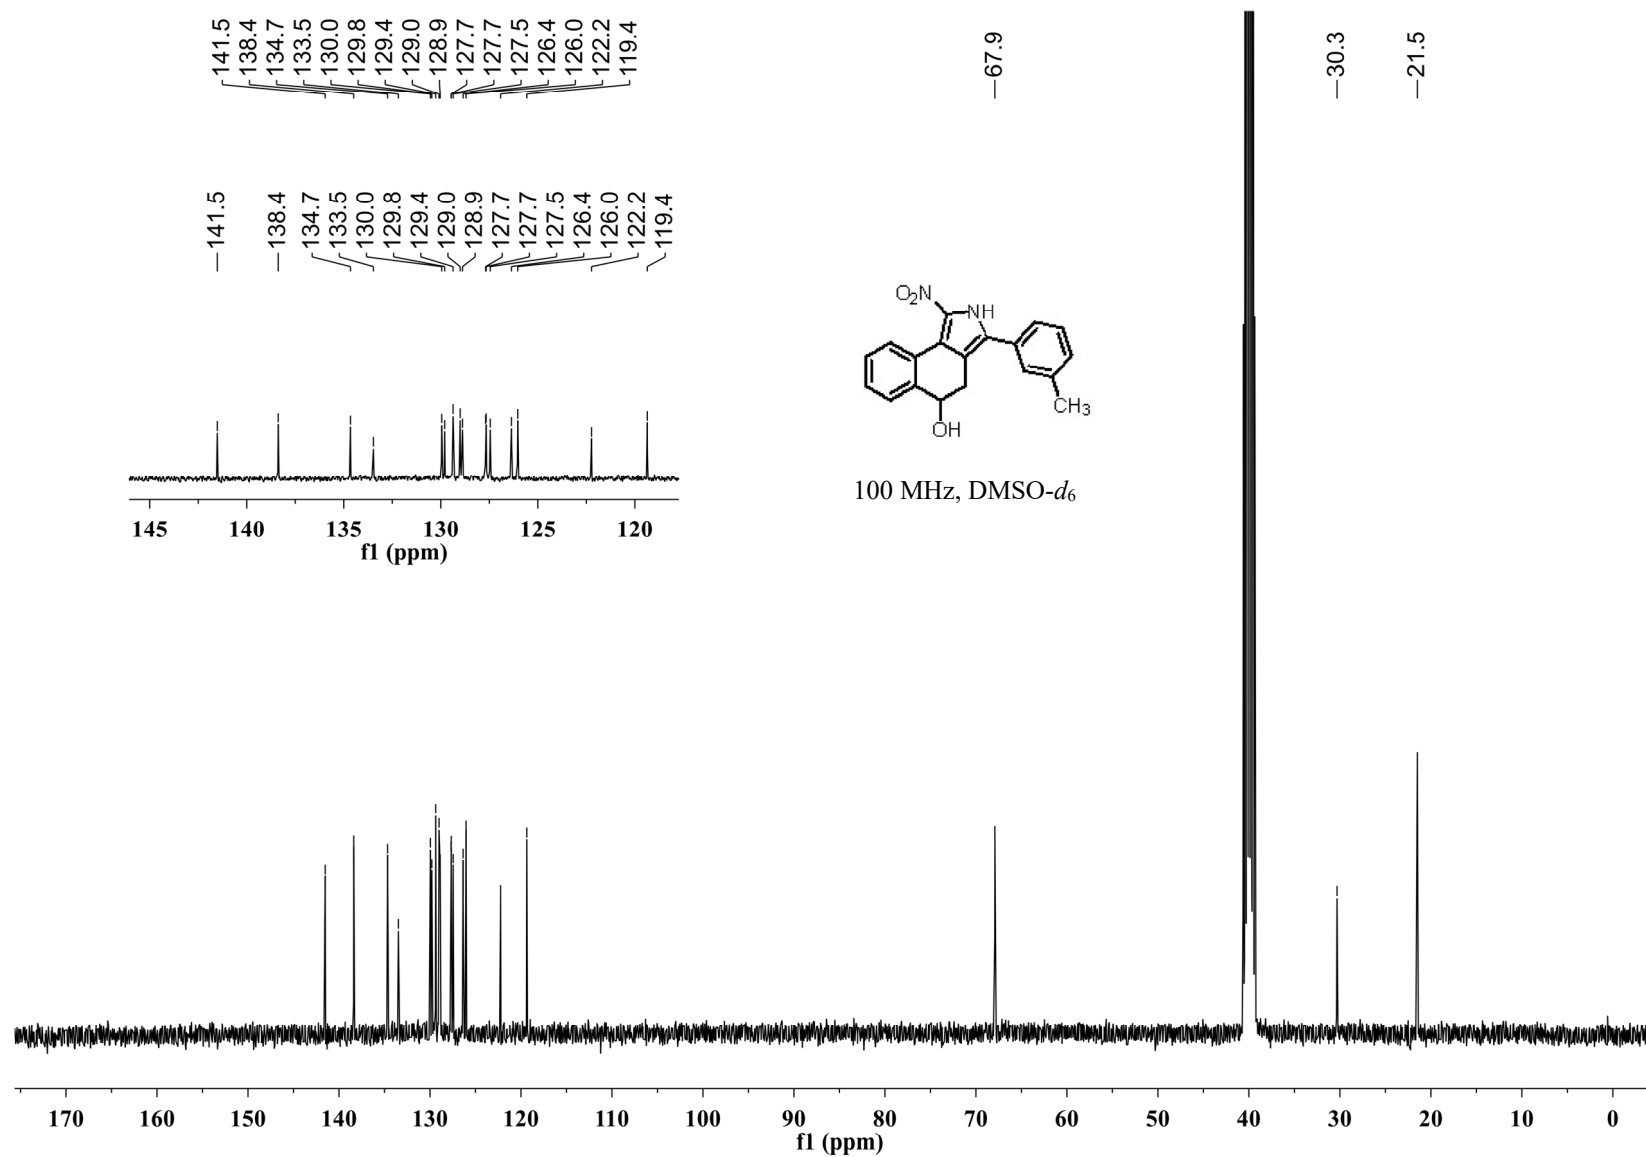

<sup>13</sup>C NMR Spectrum of Compound 7c



—13.129

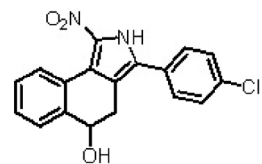

400 MHz, DMSO-*d*<sub>6</sub>

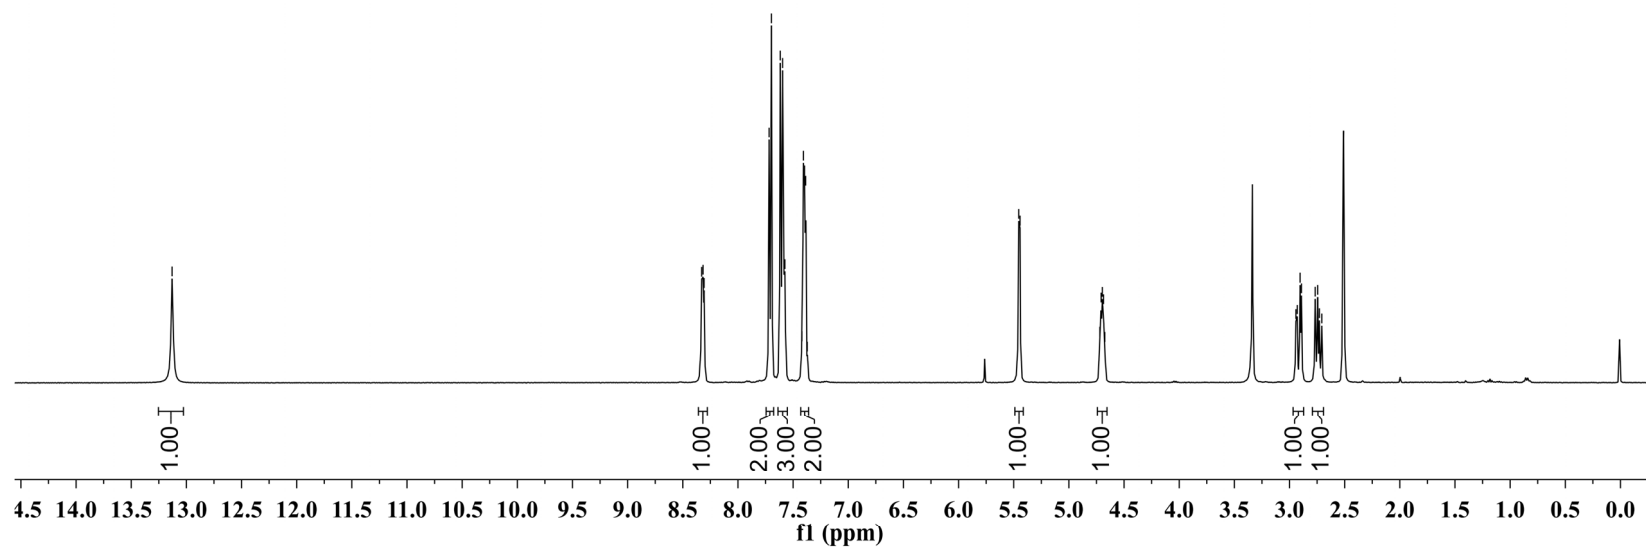

8.329  
8.316  
8.307  
7.717  
7.697  
7.616  
7.595  
7.575  
7.420  
7.406  
7.396  
7.386  
7.372  
5.455  
5.443  
4.719  
4.708  
4.697  
4.686  
4.675  
2.942  
2.930  
2.904  
2.892  
2.767  
2.745  
2.729  
2.707

<sup>1</sup>H NMR Spectrum of Compound 7d

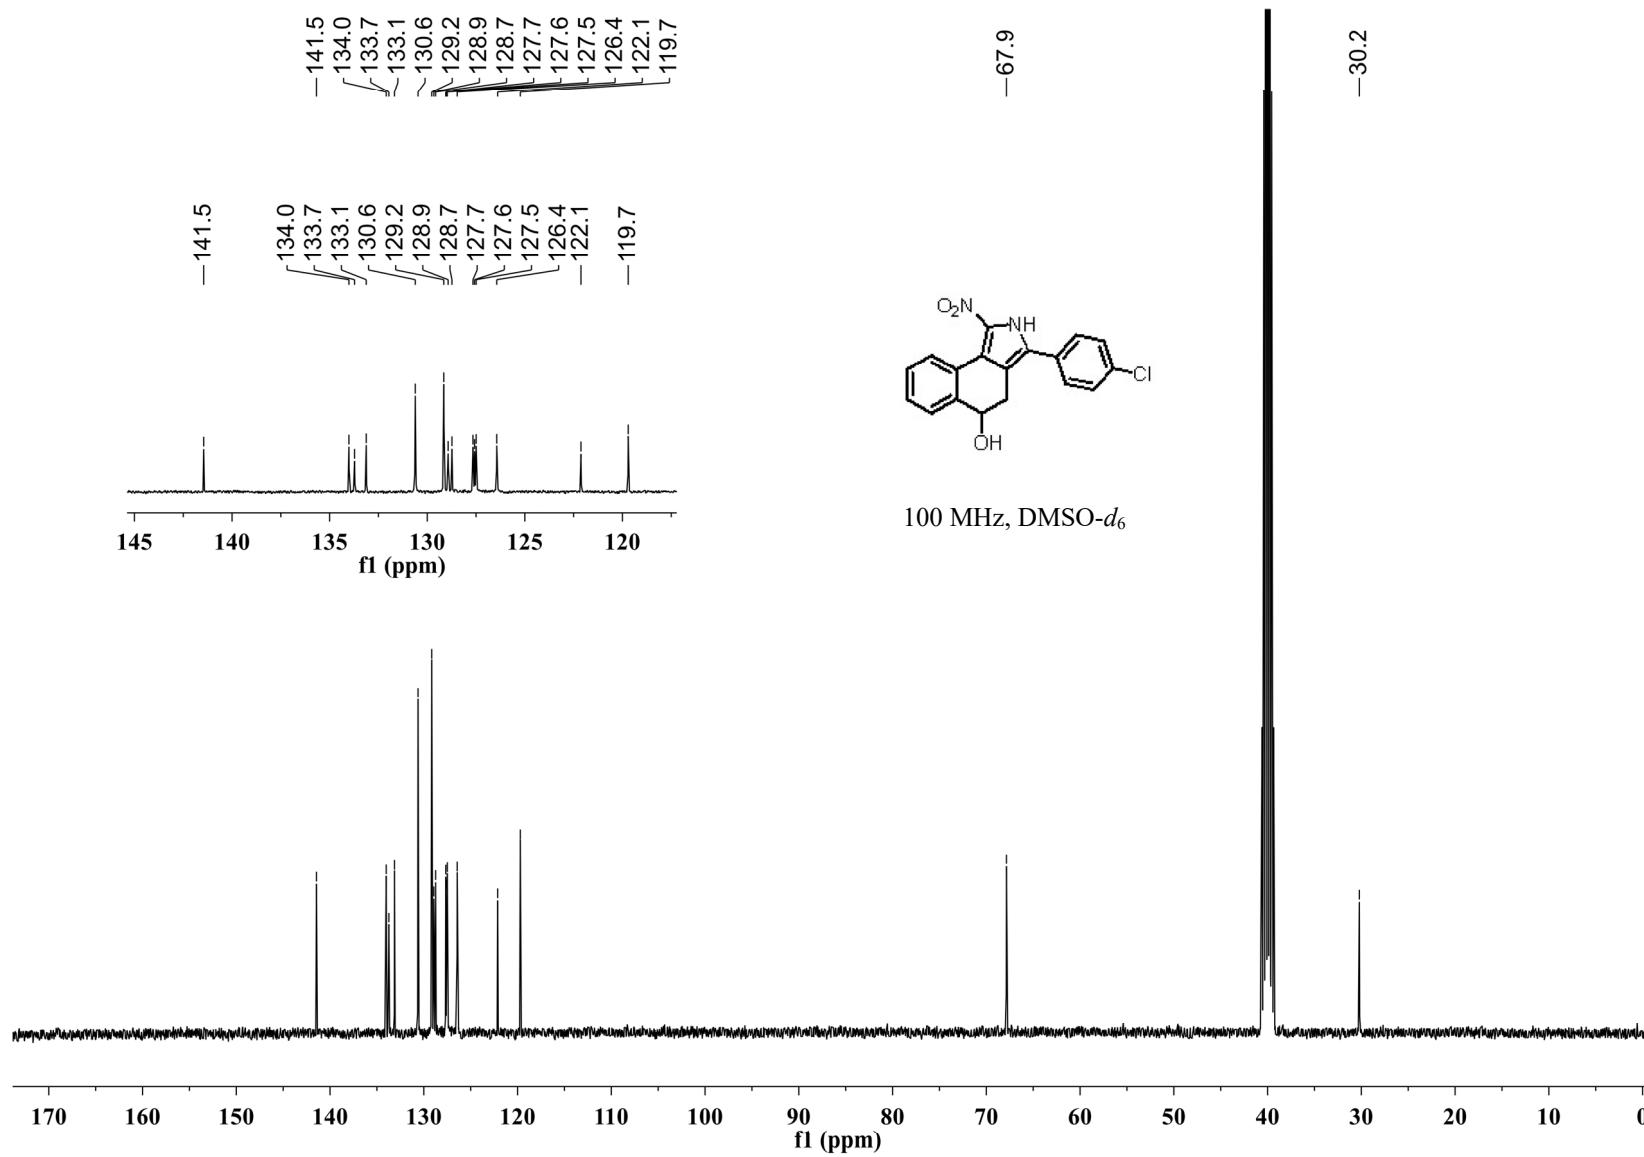

**<sup>13</sup>C NMR Spectrum of Compound 7d**

—13.169

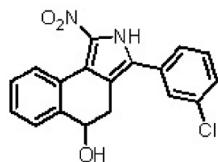

400 MHz, DMSO-*d*<sub>6</sub>

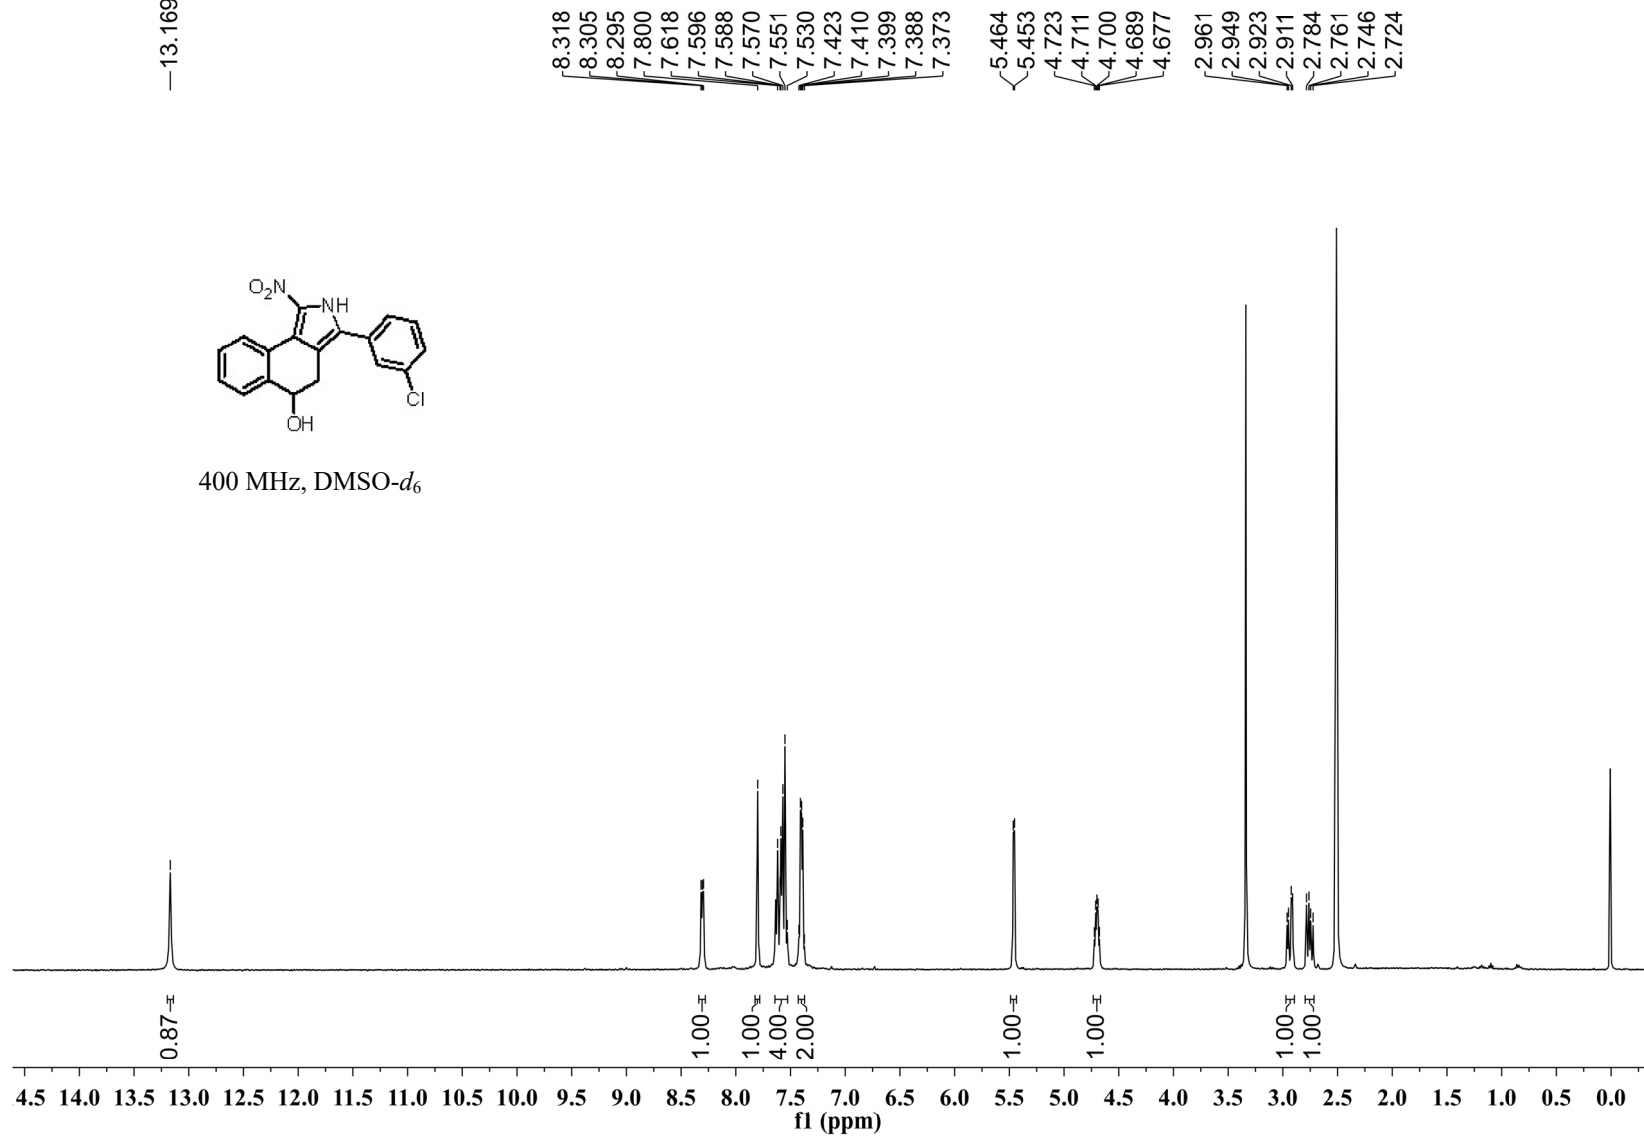

<sup>1</sup>H NMR Spectrum of Compound 7e

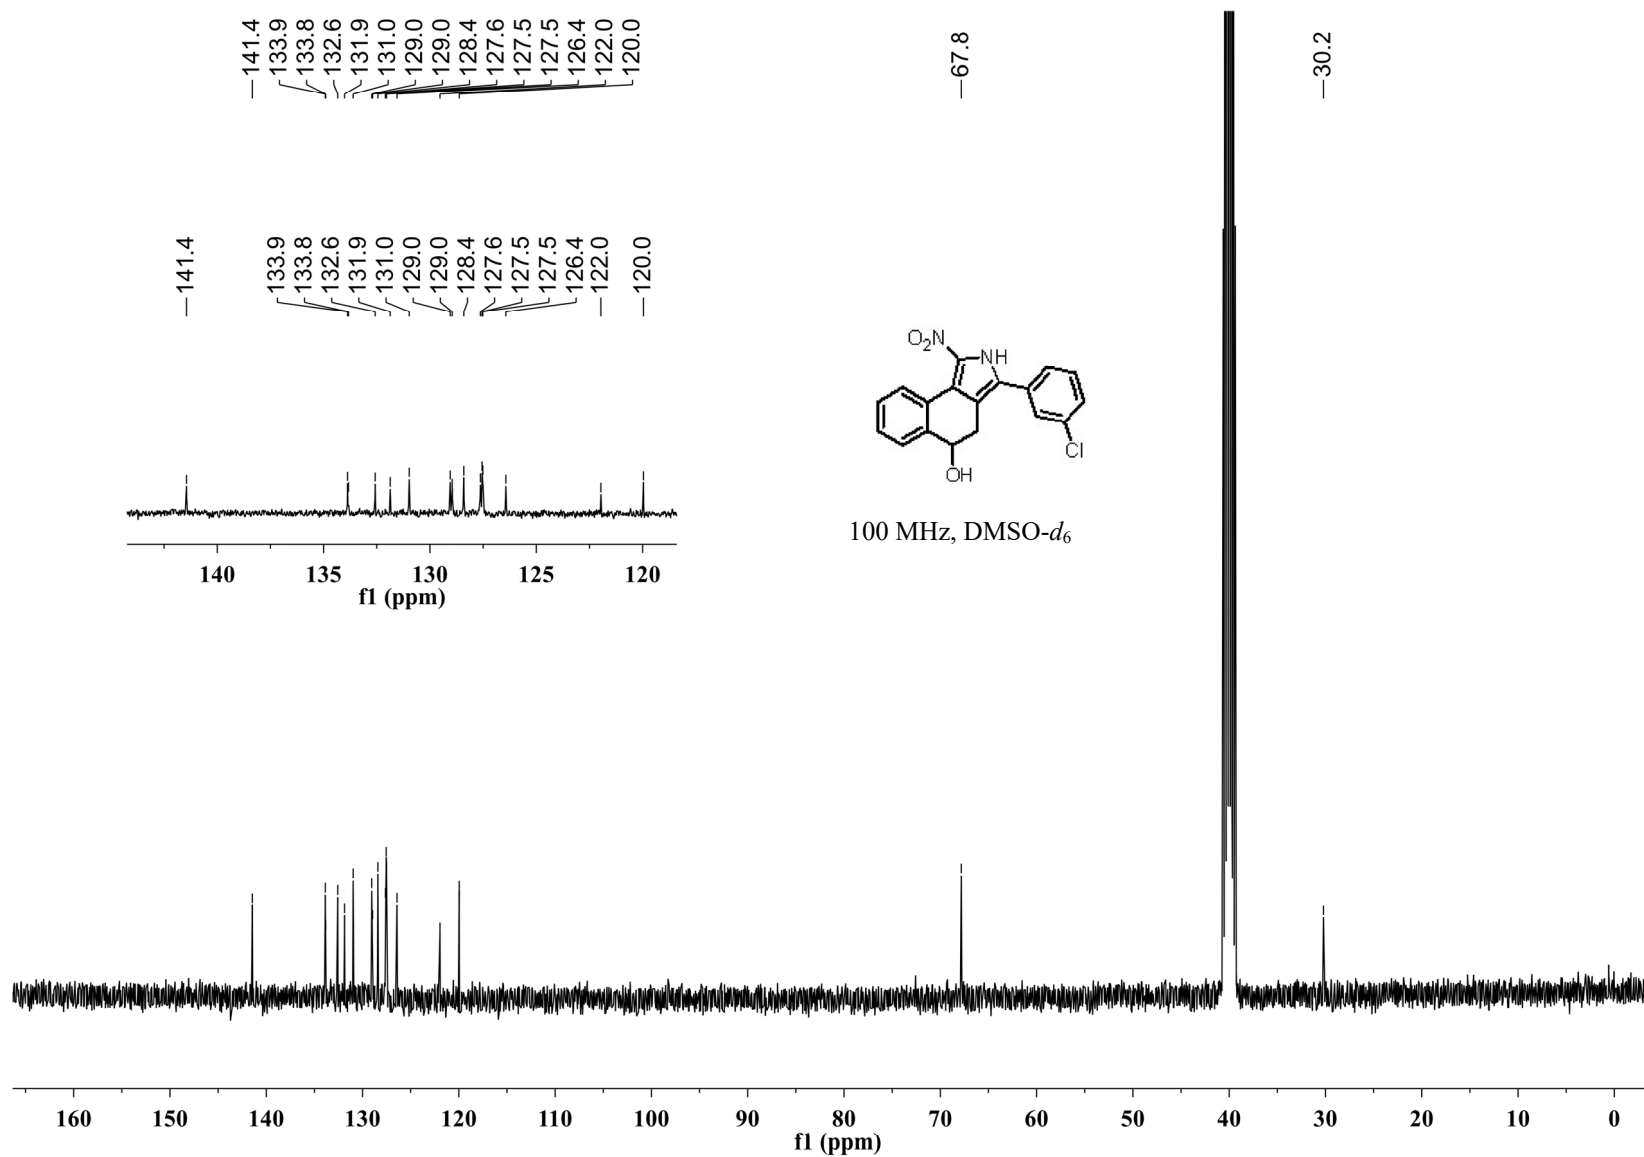

<sup>13</sup>C NMR Spectrum of Compound 7e

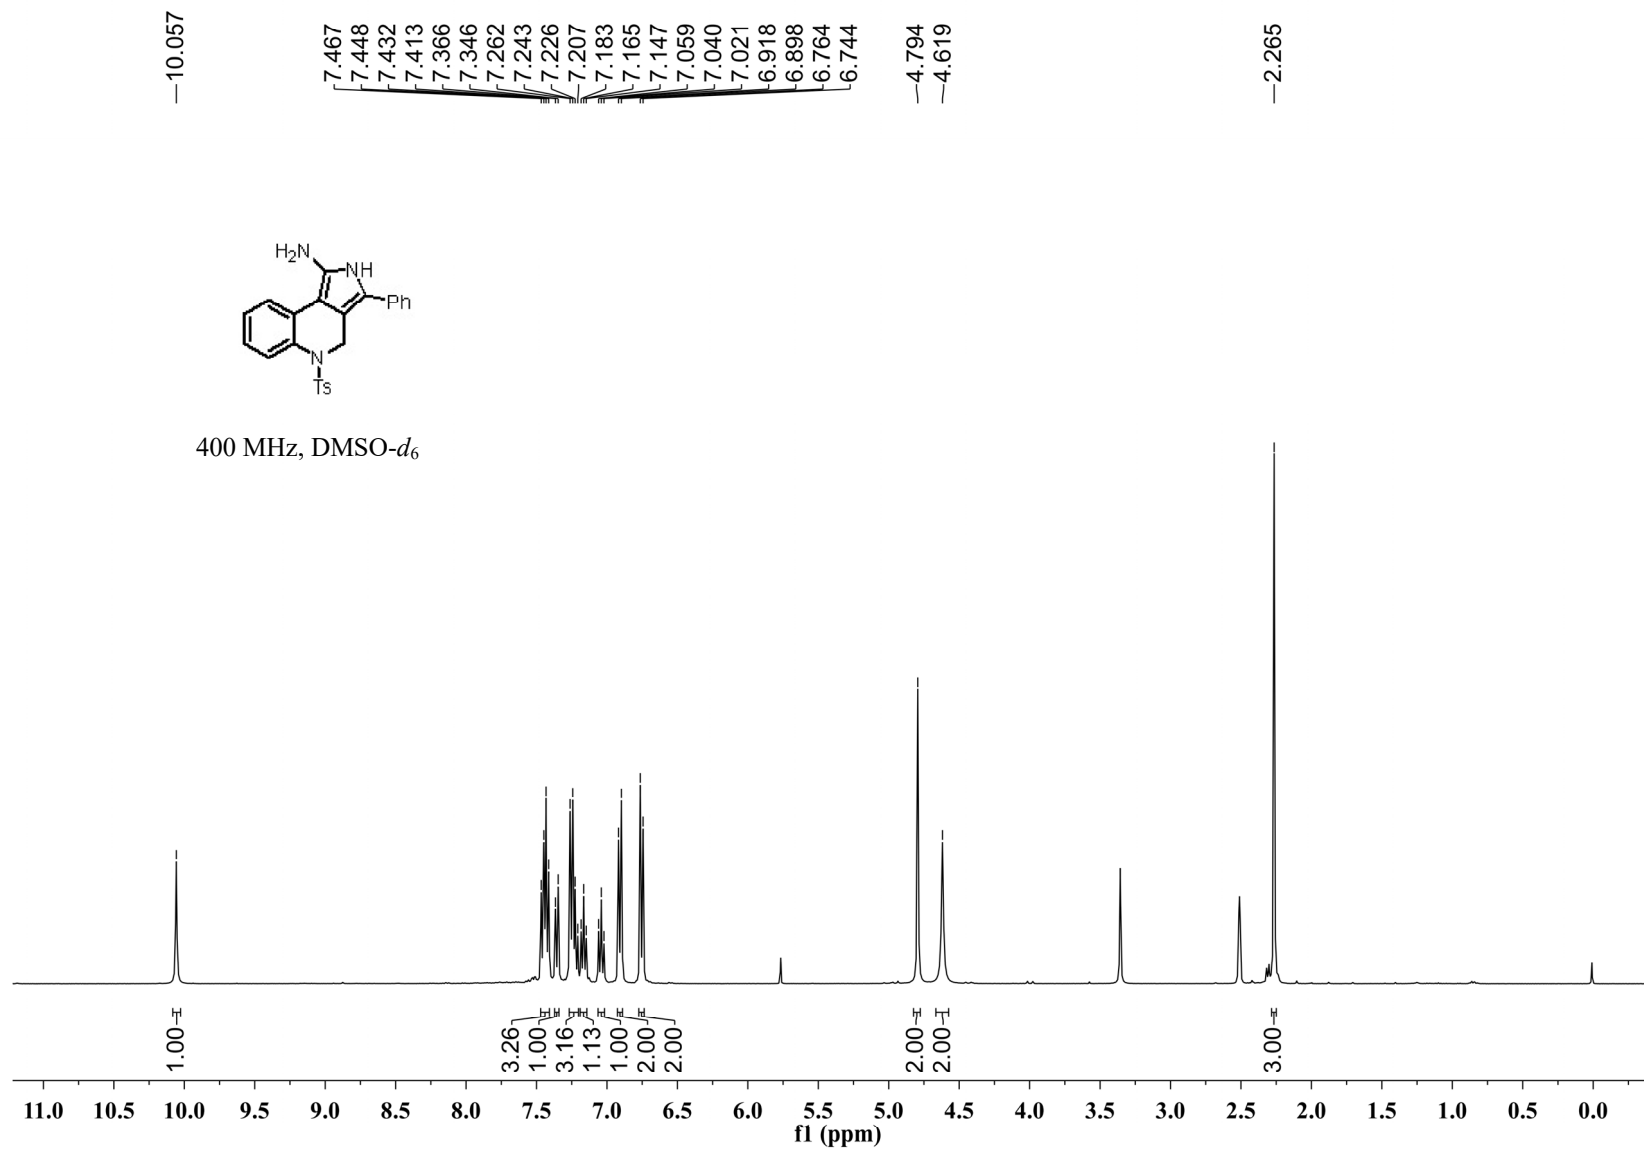

<sup>1</sup>H NMR Spectrum of Compound 8

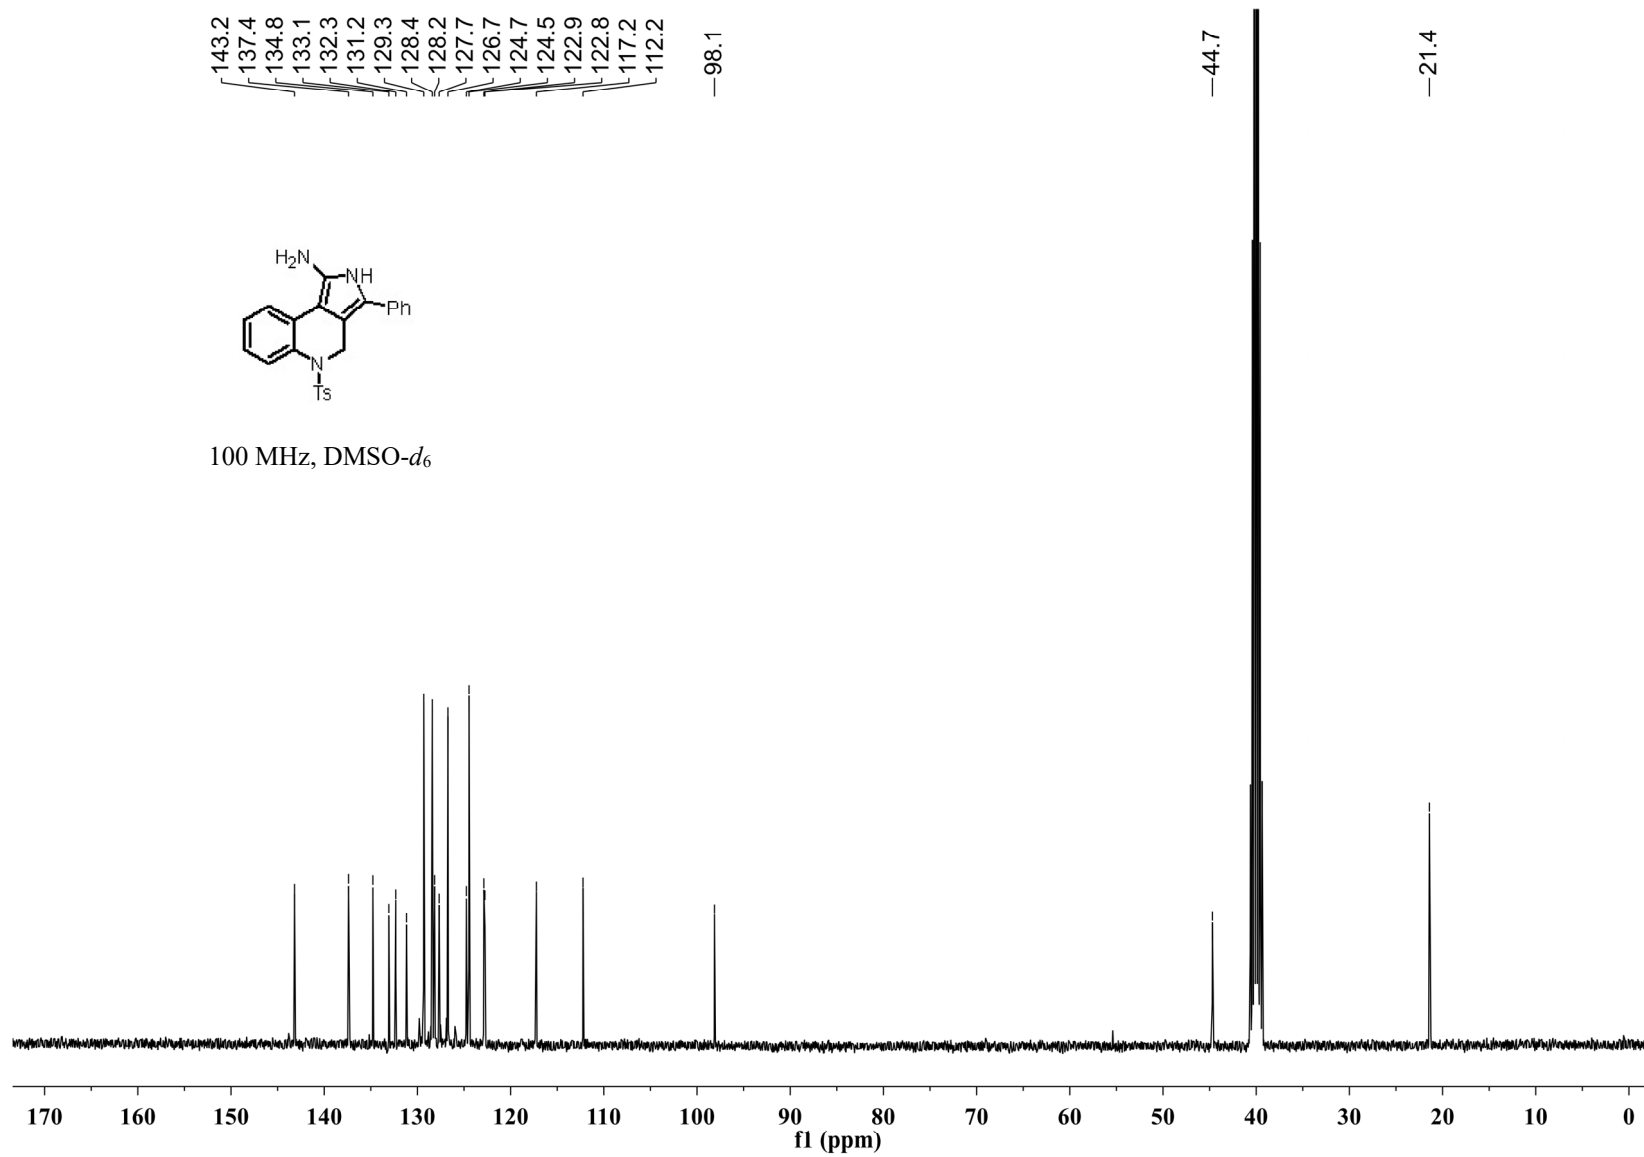

<sup>13</sup>C NMR Spectrum of Compound 8
